# Supplementary material for: LncRNA Snhg3 Aggravates Hepatic Steatosis via PPARγ Signaling
Source: bioRxiv preprint, doi:10.1101/2024.03.22.586335, version 4 (2024-09-09)
Supplement: table supp. 1 [file 586335_file14.xls]

## Sheet: Liver lncRNA-Seq 
Gene ID	Gene Symbol	Type	H1 TPM	H2 TPM	H3 TPM	N1 TPM	N2 TPM	N3 TPM	ND Average TPM	HFD Average TPM	H1 Read Count	H2 Read Count	H3 Read Count	N1 Read Count	N2 Read Count	N3 Read Count	ND Average Read Count	HFD Average Read Count	H1 FPKM	H2 FPKM	H3 FPKM	N1 FPKM	N2 FPKM	N3 FPKM	ND Average FPKM	HFD Average FPKM	log2 (HFD / ND)	Pvalue(HFD / ND)	Qvalue (HFD / ND)
100009664	'F630206G17Rik'	lncRNA	0.23	0	0	0	0	0	0	0.0766667	1	0	0	0	0	0	0	0.333333	0.18	0	0	0	0	0	0	0.06	0.747384	0.854672	0.952328
100034675	'Gm11335'	lncRNA	0.04	0.12	0.04	0.04	0.04	0.04	0.04	0.0666667	1	3	1	1	1	1	1	1.66667	0.03	0.1	0.03	0.03	0.03	0.03	0.03	0.0533333	0.51881	0.751112	0.952328
100036523	'Gm16982'	lncRNA	0.01	0.03	0.02	0.05	0.01	0.05	0.0366667	0.02	1	2	1	4	1	3	2.66667	1.33333	0.01	0.02	0.01	0.04	0.01	0.04	0.03	0.0133333	-1.23842	0.373222	0.750273
100036537	'Gm11149'	lncRNA	0	0	0.08	0	0	0	0	0.0266667	0	0	2	0	0	0	0	0.666667	0	0	0.06	0	0	0	0	0.02	1.61198	0.689933	0.952328
100036569	'Gm16525'	lncRNA	0	0.11	0.03	0.07	0.06	0.05	0.06	0.0466667	0	6.86	1.99	5	4	3	4	2.95	0	0.09	0.03	0.06	0.05	0.04	0.05	0.04	-1.00838	0.439722	0.814863
100036768	'Gm11696'	lncRNA	0.13	0.2	0.16	0.07	0.66	0.64	0.456667	0.163333	3.66	4.81	3	3	5	4	4	3.82333	0.11	0.16	0.12	0.05	0.5	0.5	0.35	0.13	-0.470118	0.632222	0.94417
100037262	'Gm12359'	lncRNA	0.39	0.65	0.36	0.42	0.77	0.48	0.556667	0.466667	13	18	12	15	27	19	20.3333	14.3333	0.32	0.51	0.28	0.34	0.59	0.37	0.433333	0.37	-0.708317	0.152548	0.434212
100037396	'D030047H15Rik'	lncRNA	0.34	0.54	0.53	0.32	0.51	0.51	0.446667	0.47	18	27	26	17.07	26.33	26	23.1333	23.6667	0.28	0.42	0.41	0.26	0.39	0.4	0.35	0.37	-0.171156	0.687893	0.952328
100038353	'Gm10532'	lncRNA	0.39	0.24	0.11	0.92	0.11	0.51	0.513333	0.246667	9	6	6	22	6	22	16.6667	7	0.32	0.19	0.09	0.75	0.08	0.39	0.406667	0.2	-1.48506	0.0373365	0.158886
100038356	'Gm15612'	lncRNA	0.2	0.32	0.2	0.08	0.18	0.14	0.133333	0.24	16	25	15	7	14	11	10.6667	18.6667	0.16	0.25	0.15	0.07	0.14	0.11	0.106667	0.186667	0.60228	0.277547	0.637046
100038358	'Gm10857'	lncRNA
100038363	'F630028O10Rik'	lncRNA	1.53	2.21	2.79	0.73	1.16	0.96	0.95	2.17667	132	182	224	64	97	79	80	179.333	1.26	1.74	2.17	0.59	0.89	0.74	0.74	1.72333	0.951594	0.000176374	0.00207781
100038374	'Gm10714'	lncRNA
100038378	'Gm10433'	lncRNA	0.5	1.04	0.44	0.78	0.59	0.56	0.643333	0.66	25	40	19	28	29	27.08	28.0267	28	0.41	0.82	0.34	0.64	0.45	0.43	0.506667	0.523333	-0.213999	0.612762	0.931854
100038392	'Gm10785'	lncRNA	0.13	0.34	0.38	0.23	0.29	0.14	0.22	0.283333	9	17	15	15	16	9	13.3333	13.6667	0.11	0.27	0.29	0.19	0.22	0.11	0.173333	0.223333	-0.181561	0.747773	0.952328
100038429	'Gm10505'	lncRNA	0	0.04	0	0.1	0.11	0	0.07	0.0133333	0	1	0	5.33	2.97	0	2.76667	0.333333	0	0.03	0	0.08	0.08	0	0.0533333	0.01	-2.94133	0.184623	0.49213
100038439	'Gm10556'	lncRNA	0	0.01	0	0	0.01	0.04	0.0166667	0.00333333	0	1	0	0	1	4	1.66667	0.333333	0	0.01	0	0	0.01	0.03	0.0133333	0.00333333	-2.42885	0.315962	0.686655
100038453	'Gm12522'	lncRNA	0.03	0	0.02	0.01	0.01	0.01	0.01	0.0166667	2	0	1	1	1	1	1	1	0.02	0	0.01	0.01	0.01	0.01	0.01	0.01	-0.201142	0.916209	0.975955
100038454	'Platr8'	lncRNA	0.21	0.37	0.18	0.06	0.09	0.24	0.13	0.253333	10	17	8	3	4	11	6	11.6667	0.17	0.29	0.14	0.05	0.07	0.19	0.103333	0.2	0.742661	0.33982	0.713876
100038460	'Gm10677'	lncRNA	0.72	0.49	0.91	0.51	0.74	0.86	0.703333	0.706667	34	22	40	25	34	39	32.6667	32	0.59	0.38	0.71	0.42	0.57	0.66	0.55	0.56	-0.240644	0.542863	0.893091
100038464	'Gm15441'	lncRNA	0.67	0.36	1.19	2.62	12.21	21.86	12.23	0.74	8	4	13	33	144	259	145.333	8.33333	0.55	0.28	0.92	2.14	9.34	16.9	9.46	0.583333	-4.329	3.62882e-11	2.40549e-09
100038468	'Gm10684'	lncRNA
100038479	'Gm10787'	lncRNA
100038481	'Gm10510'	lncRNA
100038493	'Gm13582'	lncRNA
100038494	'Gm10782'	lncRNA
100038516	'Gm10640'	lncRNA	0	0.05	0	0	0	0	0	0.0166667	0	3.33	0	0	0	0	0	1.11	0	0.04	0	0	0	0	0	0.0133333	2.21512	0.579291	0.919687
100038525	'Gm10804'	lncRNA	1.82	0.87	6.54	0.06	0.26	0.25	0.19	3.07667	91	36	170	3	13	8	8	99	1.49	0.69	5.08	0.05	0.2	0.19	0.146667	2.42	3.42969	3.68485e-08	1.31804e-06
100038526	'Gm16008'	lncRNA	9.27	14.29	12.54	7.93	9.27	8.53	8.57667	12.0333	311	423	357	275	314	281	290	363.667	7.61	11.27	9.75	6.47	7.09	6.6	6.72	9.54333	0.112103	0.478329	0.847928
100038554	'Gm15348'	lncRNA	0.05	0.82	0.08	0.71	0.44	0.23	0.46	0.316667	5	46	4	32	14	12	19.3333	18.3333	0.04	0.65	0.06	0.58	0.34	0.18	0.366667	0.25	-0.321367	0.7188	0.952328
100038555	'Gm10578'	lncRNA
100038560	'Gm10687'	lncRNA	0.46	0.46	0.63	0.31	0.2	0.45	0.32	0.516667	17	18	21	18	11	18	15.6667	18.6667	0.38	0.37	0.49	0.25	0.15	0.35	0.25	0.413333	0.0275531	0.955564	0.975955
100038566	'Gm10658'	lncRNA	11.56	12.14	9.74	8	9.52	8.42	8.64667	11.1467	276	265	203	189	214	186	196.333	248	9.5	9.57	7.57	6.53	7.28	6.51	6.77333	8.88	0.128298	0.50316	0.871097
100038574	'Gm10415'	lncRNA
100038575	'Gm10635'	lncRNA
100038577	'Gm10790'	lncRNA	0	0	0.03	0	0.26	0	0.0866667	0.01	0	0	1	0	1	0	0.333333	0.333333	0	0	0.02	0	0.2	0	0.0666667	0.00666667	-0.214388	0.957442	0.975955
100038584	'Gm14812'	lncRNA	0	0	0	0.07	0	0	0.0233333	0	0	0	0	1	0	0	0.333333	0	0	0	0	0.06	0	0	0.02	0	-1.17617	0.773161	0.952328
100038591	'F420014N23Rik'	lncRNA	0.22	0.33	0.69	0.3	0.3	0.3	0.3	0.413333	13	18	36	18	16	16	16.6667	22.3333	0.18	0.26	0.54	0.24	0.23	0.23	0.233333	0.326667	0.19498	0.71161	0.952328
100038595	'Gm16287'	lncRNA	0.03	0.08	0.02	0.03	0.01	0.02	0.02	0.0433333	2	5.02	1	2.01	0.66	1	1.22333	2.67333	0.03	0.07	0.01	0.03	0.01	0.01	0.0166667	0.0366667	1.17057	0.467963	0.839297
100038601	'Gm11691'	lncRNA
100038608	'Gm10389'	lncRNA	0.18	0.36	0.37	0.42	0.28	0.33	0.343333	0.303333	9.75	18.91	19.04	23.73	15.27	17.35	18.7833	15.9	0.14	0.28	0.29	0.34	0.22	0.25	0.27	0.236667	-0.488036	0.353226	0.727753
100038614	'Gm10791'	lncRNA	0.41	0.64	0.55	0.41	0.8	0.54	0.583333	0.533333	17	23	20	18	30	21	23	20	0.34	0.5	0.43	0.34	0.61	0.42	0.456667	0.423333	-0.408539	0.349861	0.723793
100038618	'Gm10847'	lncRNA	0.03	0	0	0	0	0.03	0.01	0.01	1	0	0	0	0	1	0.333333	0.333333	0.03	0	0	0	0	0.03	0.01	0.01	-0.214388	0.956448	0.975955
100038627	'F630042J09Rik'	lncRNA	0.03	0.01	0.01	0	0	0	0	0.0166667	3	1	1	0	0	0	0	1.66667	0.02	0.01	0.01	0	0	0	0	0.0133333	2.98261	0.230216	0.568287
100038636	'B230344G16Rik'	lncRNA	0	0	0	0	0.05	0	0.0166667	0	0	0	0	0	1	0	0.333333	0	0	0	0	0	0.04	0	0.0133333	0	-1.17617	0.773161	0.952328
100038638	'Fmr1os'	lncRNA	0.03	0	0	0	0	0	0	0.01	2	0	0	0	0	0	0	0.666667	0.02	0	0	0	0	0	0	0.00666667	1.68744	0.675716	0.952328
100038654	'Gm10371'	lncRNA	0.03	0.03	0.05	0	0.22	0.03	0.0833333	0.0366667	1	1	1	0	1	1	0.666667	1	0.02	0.02	0.04	0	0.16	0.02	0.06	0.0266667	0.390409	0.84945	0.952328
100038659	'Mirt2'	lncRNA	1.51	2.19	1.99	4.39	4.25	3.24	3.96	1.89667	31	44	39	97	86	67	83.3333	38	1.24	1.73	1.55	3.58	3.25	2.5	3.11	1.50667	-1.35234	6.80303e-06	0.000128481
100038689	'Gm10421'	lncRNA
100038690	'Gm10732'	lncRNA
100038693	'Tmem51os1'	lncRNA	0.24	0.17	0.3	0.22	0.25	0.11	0.193333	0.236667	15	12	20	14	18	10	14	15.6667	0.2	0.14	0.24	0.18	0.19	0.09	0.153333	0.193333	-0.0478398	0.928484	0.975955
100038699	'Gm10754'	lncRNA
100038706	'Gm10637'	lncRNA
100038712	'Gm10516'	lncRNA	1.71	1.38	1.24	0.51	0.84	0.58	0.643333	1.44333	86	103	78	45	62	45	50.6667	89	1.4	1.09	0.97	0.41	0.64	0.45	0.5	1.15333	0.604778	0.0253727	0.118557
100038713	'Gm10432'	lncRNA	0.07	0	0.04	0	0.07	0.07	0.0466667	0.0366667	2	0	1	0	2	2	1.33333	1	0.06	0	0.03	0	0.05	0.05	0.0333333	0.03	-0.589092	0.766235	0.952328
100038714	'Gm15401'	lncRNA	2.6	2.65	2.47	3.93	8.28	7.42	6.54333	2.57333	84	82	90	105	197	180	160.667	85.3333	2.14	2.09	1.92	3.2	6.33	5.73	5.08667	2.05	-1.11618	1.53636e-05	0.000258139
100038718	'Gm10494'	lncRNA
100038732	'Gm11681'	lncRNA	0	0	0	0	0.04	0	0.0133333	0	0	0	0	0	1	0	0.333333	0	0	0	0	0	0.03	0	0.01	0	-1.17617	0.773161	0.952328
100038734	'Gm10845'	lncRNA
100038743	'Gm13629'	lncRNA	0	0	0	0.03	0.04	0	0.0233333	0	0	0	0	2.04	3	0	1.68	0	0	0	0	0.02	0.03	0	0.0166667	0	-3.37415	0.227262	0.563724
100038746	'Gm1976'	lncRNA	6.66	4.89	6.65	3.19	6.14	4.26	4.53	6.06667	214.13	217.13	255.84	157.4	199.93	175.97	177.767	229.033	5.47	3.86	5.17	2.6	4.7	3.3	3.53333	4.83333	0.157659	0.344257	0.718328
100038752	'Gm10825'	lncRNA	0.26	0.25	1.31	0.92	0.4	0.17	0.496667	0.606667	11	10	16	2	8.78	7	5.92667	12.3333	0.21	0.19	1.02	0.75	0.3	0.13	0.393333	0.473333	0.919905	0.206607	0.530614
100038755	'Gm9917'	lncRNA	3.43	4.07	3.91	5.39	4.15	5.11	4.88333	3.80333	223	235	200	319	275	307	300.333	219.333	2.82	3.21	3.04	4.4	3.17	3.95	3.84	3.02333	-0.671298	0.000125494	0.0015468
100039027	'Gm2011'	lncRNA	4.29	4.52	4.18	3.87	4.17	3.91	3.98333	4.33	256.29	255.5	217.04	244.46	239.16	223.57	235.73	242.943	3.52	3.57	3.25	3.16	3.19	3.02	3.12333	3.44667	-0.169317	0.316412	0.687107
100039062	'Gm2027'	lncRNA	0.22	0.45	0.25	0.26	0.26	0.31	0.276667	0.306667	11.49	22.26	12.3	14.13	13.44	15.52	14.3633	15.35	0.18	0.35	0.2	0.21	0.2	0.24	0.216667	0.243333	-0.119898	0.826321	0.952328
100039176	'Gm13580'	lncRNA
100039186	'Gm2087'	lncRNA
100039332	'Gm2164'	lncRNA	0.01	0.01	0.04	0.17	0	0	0.0566667	0.02	3	1	5	1	1	0	0.666667	3	0.01	0.01	0.03	0.14	0	0	0.0466667	0.0166667	1.95592	0.244925	0.589856
100039374	'Gm2192'	lncRNA	4.41	8.94	9.32	9.92	7.14	11.51	9.52333	7.55667	178	251	259	402	258	355	338.333	229.333	3.62	7.05	7.25	8.1	5.46	8.9	7.48667	5.97333	-0.792502	0.000958418	0.00855322
100039440	'B230206L02Rik'	lncRNA	0.4	0.34	0.59	0.87	0.27	0.52	0.553333	0.443333	6	5	4	8	2	4	4.66667	5	0.32	0.27	0.46	0.71	0.2	0.4	0.436667	0.35	-0.133494	0.886381	0.966788
100039495	'Gm15706'	lncRNA	0.48	0.53	0.59	0.47	0.33	0.22	0.34	0.533333	10	10	14	10	7	4	7	11.3333	0.4	0.42	0.46	0.39	0.26	0.17	0.273333	0.426667	0.472674	0.488556	0.858662
100039542	'Tbx3os1'	lncRNA	0.3	0.33	0.2	0	0.15	0	0.05	0.276667	3	3	4	0	3	0	1	3.33333	0.25	0.26	0.15	0	0.11	0	0.0366667	0.22	1.56857	0.329637	0.702166
100039641	'E330012B07Rik'	lncRNA
100039684	'5031434O11Rik'	lncRNA	0.43	0.11	0.28	0.26	0.11	0.35	0.24	0.273333	15	10	26	13	10	15	12.6667	17	0.35	0.08	0.22	0.21	0.09	0.27	0.19	0.216667	0.199633	0.730186	0.952328
100039691	'Lncenc1'	lncRNA	0	0	0	0.04	0	0	0.0133333	0	0	0	0	3	0	0	1	0	0	0	0	0.03	0	0	0.01	0	-2.72352	0.494947	0.863698
100039706	'Gm2381'	lncRNA	0.27	0.3	0.24	0.44	0.36	0.42	0.406667	0.27	73.92	78.87	60.53	121	94.65	109.42	108.357	71.1067	0.22	0.24	0.18	0.36	0.27	0.33	0.32	0.213333	-0.837908	0.00108712	0.00948269
100039727	'1700049E15Rik'	lncRNA
100039805	'D5Ertd605e'	lncRNA	0.07	0	0.1	0.02	0.02	0.09	0.0433333	0.0566667	1	0	2	1	1	2	1.33333	1	0.06	0	0.08	0.02	0.02	0.07	0.0366667	0.0466667	-0.636759	0.72405	0.952328
100039864	'Snhg12'	lncRNA	19.66	23.21	18.87	17.83	15.56	14.13	15.84	20.58	277	299	307	366	315	275	318.667	294.333	16.15	18.3	14.68	14.55	11.9	10.93	12.46	16.3767	-0.333885	0.0541479	0.209882
100039911	'Gm2491'	lncRNA
100039954	'Gm2516'	lncRNA	0.01	0.02	0	0	0	0.04	0.0133333	0.01	0.76	1	0	0	0	1.95	0.65	0.586667	0.01	0.02	0	0	0	0.03	0.01	0.01	-0.214388	0.956759	0.975955
100039957	'Gm2518'	lncRNA	0.78	0.99	0.55	0.91	0.88	0.44	0.743333	0.773333	20	24	13	24	22	11	19	19	0.64	0.78	0.43	0.74	0.67	0.34	0.583333	0.616667	-0.212043	0.684045	0.952328
100040030	'Gm2560'	lncRNA
100040294	'Gm2694'	lncRNA	0	0	0.02	0.07	0.08	0.03	0.06	0.00666667	0	0	1	4.42	4.78	1.89	3.69667	0.333333	0	0	0.01	0.06	0.06	0.02	0.0466667	0.00333333	-3.27701	0.0758437	0.268476
100040322	'3830408C21Rik'	lncRNA	0.94	0.92	1.17	0.24	0.42	0.43	0.363333	1.01	30	36	34	14	16	14	14.6667	33.3333	0.78	0.73	0.91	0.19	0.32	0.33	0.28	0.806667	0.970633	0.0192931	0.0962417
100040328	'Gm2716'	lncRNA
100040339	'Gm2721'	lncRNA
100040421	'Gm2762'	lncRNA	0.35	0.39	0.15	0.06	0.2	0.23	0.163333	0.296667	10.73	13.44	5.33	2.73	7.79	9	6.50667	9.83333	0.28	0.3	0.11	0.05	0.16	0.18	0.13	0.23	0.438896	0.589868	0.923935
100040507	'Gm2814'	lncRNA	1.65	1.34	1.73	4.14	3.06	5.67	4.29	1.57333	80	62	78	206	144	264	204.667	73.3333	1.36	1.06	1.35	3.38	2.34	4.38	3.36667	1.25667	-1.70435	3.82341e-09	1.67852e-07
100040525	'Tmem181c-ps'	lncRNA	0.63	0.63	0.86	0.25	0.25	0.47	0.323333	0.706667	17.34	24.18	31.67	9.96	8.85	17.9	12.2367	24.3967	0.52	0.49	0.67	0.2	0.19	0.36	0.25	0.56	0.857333	0.114438	0.357567
100040557	'Gm12408'	lncRNA
100040617	'Wincr1'	lncRNA
100040710	'Gm13219'	lncRNA
100040724	'Mirg'	lncRNA	0.01	0.21	0.35	0.06	0.01	0.04	0.0366667	0.19	1.23	5	3	5.27	1.21	3	3.16	3.07667	0.01	0.16	0.27	0.05	0.01	0.03	0.03	0.146667	-0.24913	0.836018	0.952328
100040736	'Foxd2os'	lncRNA	0.25	0.36	0.33	0.39	0.34	0.11	0.28	0.313333	14	26	20	17	16	10	14.3333	20	0.21	0.29	0.26	0.32	0.26	0.09	0.223333	0.253333	0.261591	0.610914	0.930265
100040769	'Gm15506'	lncRNA	0.6	0.5	0.46	0.34	0.36	0.26	0.32	0.52	46.81	44	41.45	33.24	30.77	20.86	28.29	44.0867	0.49	0.4	0.36	0.27	0.27	0.2	0.246667	0.416667	0.444516	0.218384	0.551559
100040822	'Gm1604a'	lncRNA	0.8	0.88	0.72	0.75	0.62	0.9	0.756667	0.8	67	81	55.7	58.51	44.55	57.09	53.3833	67.9	0.66	0.7	0.56	0.61	0.47	0.7	0.593333	0.64	0.132882	0.662477	0.952328
100040846	'5930403N24Rik'	lncRNA	0.02	0.04	0.06	0	0	0.01	0.00333333	0.04	1	2	6	0	0	1	0.333333	3	0.02	0.03	0.05	0	0	0.01	0.00333333	0.0333333	2.83389	0.142365	0.414708
100040852	'Gm3002'	lncRNA	0.12	0.08	0.08	0.09	0.08	0.04	0.07	0.0933333	8.87	5.46	5.76	7.36	5.88	3.12	5.45333	6.69667	0.1	0.06	0.06	0.08	0.06	0.03	0.0566667	0.0733333	0.0493146	0.953586	0.975955
100040882	'1700017G19Rik'	lncRNA
100040926	'Gm3045'	lncRNA	0	0	0	0.01	0	0	0.00333333	0	0	0	0	1	0	0	0.333333	0	0	0	0	0.01	0	0	0.00333333	0	-1.17617	0.773161	0.952328
100041034	'LOC100041034'	lncRNA	0.13	0.07	0.22	0.06	0.14	0.21	0.136667	0.14	2	1	3	1	2	3	2	2	0.11	0.06	0.17	0.05	0.11	0.16	0.106667	0.113333	-0.211003	0.87571	0.961407
100041089	'Gm3134'	lncRNA	11.48	12.8	25.62	9.11	11.63	7.97	9.57	16.6333	196	175	181	153	178	158	163	184	9.43	10.1	19.92	7.44	8.9	6.16	7.5	13.15	-0.0357075	0.836471	0.952328
100041099	'Gm3137'	lncRNA	0.03	0	0	0	0	0	0	0.01	1	0	0	0	0	0	0	0.333333	0.03	0	0	0	0	0	0	0.01	0.747384	0.854672	0.952328
100041108	'Gm3143'	lncRNA
100041244	'Gm3230'	lncRNA	0.1	0.21	0.11	0	0.05	0	0.0166667	0.14	2	4	2	0	1	0	0.333333	2.66667	0.08	0.16	0.08	0	0.04	0	0.0133333	0.106667	2.67891	0.157462	0.443182
100041286	'Snhg15'	lncRNA	3.38	5.01	10.16	5.1	4.72	4.26	4.69333	6.18333	87.11	124.6	281.91	127.62	118	99	114.873	164.54	2.78	3.95	7.9	4.16	3.61	3.29	3.68667	4.87667	0.285464	0.456663	0.828002
100041289	'Gm3255'	lncRNA	3.63	3.86	4.77	1.43	1.72	1.31	1.48667	4.08667	90.77	88.65	106.12	35.63	40.69	32.67	36.33	95.18	2.98	3.04	3.71	1.17	1.32	1.01	1.16667	3.24333	1.19505	1.03871e-05	0.000184777
100041290	'D4Ertd617e'	lncRNA	0.11	0.06	0.18	0.21	0.17	0.06	0.146667	0.116667	2	1	3	4	3	1	2.66667	2	0.09	0.05	0.14	0.17	0.13	0.04	0.113333	0.0933333	-0.635415	0.620459	0.93646
100041311	'Gm11978'	lncRNA
100041347	'Ccdc201'	lncRNA	0	0	0	0.07	0	0	0.0233333	0	0	0	0	1	0	0	0.333333	0	0	0	0	0.06	0	0	0.02	0	-1.17617	0.773161	0.952328
100041479	'Gm3363'	lncRNA	0	0	0	0	0.07	0	0.0233333	0	0	0	0	0	0.85	0	0.283333	0	0	0	0	0	0.06	0	0.02	0
100041480	'Gm9833'	lncRNA	0.09	0.07	0.1	0.12	0.17	0.18	0.156667	0.0866667	9	7	10	13	17	18	16	8.66667	0.07	0.05	0.08	0.1	0.13	0.14	0.123333	0.0666667	-1.09563	0.0521066	0.203684
100041562	'Gm14762'	lncRNA	0.08	0.12	0.03	0.38	0.52	0.89	0.596667	0.0766667	6	5	2	28	28	59	38.3333	4.33333	0.06	0.1	0.02	0.31	0.4	0.69	0.466667	0.06	-3.35912	1.41586e-07	4.33179e-06
100041576	'Gm3414'	lncRNA	0.96	0.72	1.03	0.96	0.89	1.06	0.97	0.903333	31	22	31	32	28	33	31	28	0.79	0.56	0.8	0.79	0.68	0.82	0.763333	0.716667	-0.36335	0.339236	0.713139
100041605	'Gm3428'	lncRNA
100041618	'Gm3434'	lncRNA
100041655	'Gm10863'	lncRNA	0.06	0.37	0.02	0	0.08	0.29	0.123333	0.15	1	6	1	0	2	6	2.66667	2.66667	0.05	0.29	0.01	0	0.06	0.23	0.0966667	0.116667	-0.21403	0.886724	0.966911
100041660	'Gm3458'	lncRNA	0	0.02	0	0	0	0	0	0.00666667	0	1	0	0	0	0	0	0.333333	0	0.01	0	0	0	0	0	0.00333333	0.747384	0.854672	0.952328
100041694	'Gm10451'	lncRNA	0.21	0.69	0.36	0.77	0.46	1.48	0.903333	0.42	4	14	10	20	12	34	22	9.33333	0.17	0.54	0.28	0.63	0.35	1.14	0.706667	0.33	-1.47283	0.0238995	0.113464
100041739	'1700025D23Rik'	lncRNA
100041805	'Gm3519'	lncRNA
100041931	'Gm13403'	lncRNA
100042056	'9130019P16Rik'	lncRNA	0.23	0.16	0.37	0.33	0.54	0.38	0.416667	0.253333	23	13	31	38	54	41	44.3333	22.3333	0.19	0.13	0.29	0.27	0.41	0.3	0.326667	0.203333	-1.19755	0.0033974	0.0242666
100042132	'Gm12371'	lncRNA
100042143	'Gm3693'	lncRNA
100042166	'Gm3704'	lncRNA	6.15	5.53	3.87	1.44	3.45	1.47	2.12	5.18333	573.61	530.76	313.36	184.42	338.25	178.69	233.787	472.577	5.05	4.36	3.01	1.18	2.64	1.13	1.65	4.14	0.82627	0.00507479	0.0335983
100042194	'Gm13446'	lncRNA
100042198	'Gm3716'	lncRNA	0	0	0.04	0	0	0	0	0.0133333	0	0	1	0	0	0	0	0.333333	0	0	0.03	0	0	0	0	0.01	0.747384	0.854672	0.952328
100042218	'Gm3728'	lncRNA	0.07	0.21	0	0	0	0.05	0.0166667	0.0933333	1.36	3.97	0	0	0	1.01	0.336667	1.77667	0.06	0.17	0	0	0	0.04	0.0133333	0.0766667	1.6832	0.513563	0.877628
100042277	'Gm3764'	lncRNA
100042291	'Gm3772'	lncRNA	1.3	1.5	1.53	1.06	1.03	0.88	0.99	1.44333	78.24	86.1	85.58	65.62	60.37	50.64	58.8767	83.3067	1.07	1.18	1.19	0.87	0.79	0.68	0.78	1.14667	0.292299	0.251145	0.600117
100042332	'2810410L24Rik'	lncRNA	3.88	4.8	3.93	4.17	4.8	4	4.32333	4.20333	164	208	158	179	218	164	187	176.667	3.19	3.79	3.05	3.4	3.67	3.09	3.38667	3.34333	-0.292415	0.134298	0.399061
100042484	'4732419C18Rik'	lncRNA	5.83	3.73	4.47	5.16	4.13	3.46	4.25	4.67667	210.19	162.89	153	202.93	120.79	135.46	153.06	175.36	4.79	2.94	3.48	4.21	3.16	2.68	3.35	3.73667	-0.0223647	0.936531	0.975955
100042498	'Mir22hg'	lncRNA	10.25	11.58	10.96	19.1	22.46	25.88	22.48	10.93	490	528	487	936	1042	1189	1055.67	501.667	8.42	9.13	8.52	15.59	17.18	20.01	17.5933	8.69	-1.28737	3.36618e-21	9.15326e-19
100042584	'Gm16523'	lncRNA	0.22	0.35	0.36	0.21	0.22	0.66	0.363333	0.31	2	3	3	2	2	6	3.33333	2.66667	0.18	0.28	0.28	0.17	0.17	0.51	0.283333	0.246667	-0.544832	0.631018	0.943592
100042605	'Rbakdn'	lncRNA
100042648	'Gm3948'	lncRNA	0.32	0.26	0.69	0.52	0.27	0.2	0.33	0.423333	9	4	6	4	14.02	4.54	7.52	6.33333	0.27	0.2	0.54	0.42	0.21	0.15	0.26	0.336667	-0.389995	0.646664	0.952328
100042679	'Gm16386'	lncRNA	1.74	2.43	2.67	3.04	4.16	2.7	3.3	2.28	73.48	82.17	76.93	63.93	78.31	61.79	68.01	77.5267	1.43	1.92	2.08	2.48	3.18	2.09	2.58333	1.81	-0.0174176	0.943016	0.975955
100042757	'Gm4013'	lncRNA	0.63	0.87	1.24	0.37	0.45	0.97	0.596667	0.913333	10	13	18	6	7	15	9.33333	13.6667	0.52	0.69	0.97	0.3	0.35	0.75	0.466667	0.726667	0.328215	0.610389	0.930093
100042794	'Gm4035'	lncRNA
100042814	'Apol7d'	lncRNA	0.6	0.38	0.46	0.96	0.8	0.12	0.626667	0.48	8	6	7	9	7	2	6	7	0.49	0.3	0.35	0.78	0.61	0.09	0.493333	0.38	0.00740375	0.992845	0.996135
100042827	'Gm12052'	lncRNA	0	0.15	0.11	0.06	0	0	0.02	0.0866667	0	3	3	2	0	0	0.666667	2	0	0.12	0.09	0.05	0	0	0.0166667	0.07	1.30312	0.557603	0.90451
100042889	'C920021L13Rik'	lncRNA	3.28	2.33	3.11	1.48	1.83	1.65	1.65333	2.90667	15	9	12	11	10	14	11.6667	12	2.69	1.84	2.42	1.21	1.4	1.28	1.29667	2.31667	-0.173036	0.766104	0.952328
100042926	'Gm13546'	lncRNA
100042948	'Gm15760'	lncRNA	0.62	0.6	0.89	0.76	0.83	0.98	0.856667	0.703333	15.09	14.01	20	19.01	20	22.56	20.5233	16.3667	0.51	0.47	0.69	0.62	0.64	0.76	0.673333	0.556667	-0.532453	0.24718	0.593415
100042951	'Gm4123'	lncRNA	0.14	0.04	0.13	0.11	0.13	0.12	0.12	0.103333	11	4	9.14	8.3	10	8.92	9.07333	8.04667	0.11	0.03	0.1	0.09	0.1	0.1	0.0966667	0.08	-0.320863	0.649637	0.952328
100043040	'1110002L01Rik'	lncRNA	7.59	9.33	8.73	4.41	6.22	6.32	5.65	8.55	172	177	187	105	150	122	125.667	178.667	6.23	7.35	6.79	3.6	4.76	4.88	4.41333	6.79	0.298966	0.111444	0.350663
100043065	'6030469F06Rik'	lncRNA
100043072	'A230070E04Rik'	lncRNA
100043089	'Gm4221'	lncRNA	0.4	0.33	0.18	0.11	0.2	0.22	0.176667	0.303333	19.04	7	10.96	7.15	11.03	13.67	10.6167	12.3333	0.33	0.26	0.14	0.09	0.15	0.17	0.136667	0.243333	0.0169445	0.979527	0.988357
100043102	'4632428C04Rik'	lncRNA	0.78	0.78	0.98	0.77	0.77	0.73	0.756667	0.846667	44	43	53	45	43	40	42.6667	46.6667	0.64	0.62	0.76	0.63	0.59	0.56	0.593333	0.673333	-0.0874075	0.773487	0.952328
100043132	'Gm4251'	lncRNA	0	0	0	0	0.17	0	0.0566667	0	0	0	0	0	2	0	0.666667	0	0	0	0	0	0.13	0	0.0433333	0	-1.99477	0.621905	0.93646
100043147	'Gm4262'	lncRNA	0.2	0.26	0.1	1.15	0.33	0.96	0.813333	0.186667	9.92	12.78	4.73	59.97	16.01	46.66	40.88	9.14333	0.16	0.21	0.08	0.94	0.25	0.74	0.643333	0.15	-2.51353	8.89433e-05	0.00115168
100043169	'Gm4278'	lncRNA
100043189	'Gm4285'	lncRNA	0.98	1.85	1.22	1.17	1.39	1.75	1.43667	1.35	50	90	58	61.01	68.61	85.94	71.8533	66	0.81	1.46	0.95	0.95	1.06	1.36	1.12333	1.07333	-0.329725	0.290667	0.65597
100043213	'5330434G04Rik'	lncRNA
100043229	'Gm10046'	lncRNA	0.6	0.26	0.8	0.56	1.33	0.48	0.79	0.553333	5	2	6	5	11	4	6.66667	4.33333	0.49	0.2	0.62	0.46	1.02	0.37	0.616667	0.436667	-0.816246	0.361854	0.73783
100043232	'3110099E03Rik'	lncRNA
100043245	'Gm4311'	lncRNA
100043255	'Gm4319'	lncRNA
100043309	'4732414G09Rik'	lncRNA	0	0	0	0.03	0	0	0.01	0	0	0	0	2	0	0	0.666667	0	0	0	0	0.03	0	0	0.01	0	-2.13576	0.596345	0.923935
100043315	'LOC100043315'	lncRNA
100043335	'Gm4371'	lncRNA
100043407	'Gm4419'	lncRNA	0.18	1.26	0.81	0.44	0.78	0.7	0.64	0.75	8.55	13.18	11.41	19.58	16.93	13.74	16.75	11.0467	0.15	0.99	0.63	0.36	0.59	0.54	0.496667	0.59	-0.805698	0.142494	0.414991
100043416	'Gm4425'	lncRNA	0.53	0.32	0.3	0.38	0.38	0.34	0.366667	0.383333	28.59	19.26	15.38	20.46	20.49	17.3	19.4167	21.0767	0.43	0.25	0.23	0.31	0.29	0.27	0.29	0.303333	-0.0861112	0.856154	0.9528
100043424	'Morrbid'	lncRNA	2.11	2.84	3.28	2.11	1.63	1.72	1.82	2.74333	93.3	111	117.26	77	66	72.69	71.8967	107.187	1.74	2.24	2.55	1.72	1.25	1.33	1.43333	2.17667	0.35811	0.128149	0.386741
100043450	'AA387883'	lncRNA
100043489	'1300002E11Rik'	lncRNA	8.5	9.76	9.81	19.44	22.22	28.99	23.55	9.35667	375	454	455	1008	1001	1261	1090	428	6.98	7.7	7.63	15.86	17	22.41	18.4233	7.43667	-1.56811	1.09137e-23	4.09619e-21
100043513	'Gm4489'	lncRNA
100043582	'AU016765'	lncRNA
100043600	'Gm4544'	lncRNA	0	0	0.1	0	0	0	0	0.0333333	0	0	1	0	0	0	0	0.333333	0	0	0.08	0	0	0	0	0.0266667	0.747384	0.854672	0.952328
100043606	'Arl4aos'	lncRNA	0.09	0.06	0.16	0.04	0.04	0.04	0.04	0.103333	5	4	9	3	4	4	3.66667	6	0.08	0.05	0.12	0.04	0.03	0.03	0.0333333	0.0833333	0.494898	0.582702	0.921915
100043609	'Gm14207'	lncRNA	0.12	0.38	0.19	0.28	0.23	0.25	0.253333	0.23	2	6	2	4	2	4	3.33333	3.33333	0.1	0.3	0.15	0.23	0.17	0.19	0.196667	0.183333	-0.230142	0.833439	0.952328
100043636	'AI662270'	lncRNA	1.02	2.29	4.02	0.64	0.93	1.21	0.926667	2.44333	35	71	98	18	29	37	28	68	0.84	1.8	3.13	0.53	0.71	0.94	0.726667	1.92333	1.05918	0.0170535	0.0874857
100043644	'Gm4566'	lncRNA
100043726	'Gm4610'	lncRNA
100043729	'Gm14010'	lncRNA	0.25	0	0	0	0	0	0	0.0833333	1	0	0	0	0	0	0	0.333333	0.2	0	0	0	0	0	0	0.0666667	0.747384	0.854672	0.952328
100043765	'Gm4632'	lncRNA	0.11	0	0	0.1	0	0	0.0333333	0.0366667	1	0	0	1	0	0	0.333333	0.333333	0.09	0	0	0.09	0	0	0.03	0.03	-0.214388	0.956135	0.975955
100043902	'Six3os1'	lncRNA
100043904	'Gm4719'	lncRNA
100043910	'A630075F10Rik'	lncRNA	0	0	0.02	0.02	0.02	0.07	0.0366667	0.00666667	0	0	1	1	1	3.01	1.67	0.333333	0	0	0.02	0.02	0.02	0.05	0.03	0.00666667	-2.43784	0.249281	0.596932
100043911	'Ppp4r1l-ps'	lncRNA	8.86	9.15	9.76	7.24	9.39	7.02	7.88333	9.25667	662	580	714	500	638	580	572.667	652	7.28	7.22	7.59	5.91	7.18	5.43	6.17333	7.36333	-0.0227198	0.869046	0.958657
100043946	'Gm14635'	lncRNA
100045066	'Gm17767'	lncRNA	0.46	1.05	1.36	0.8	1.22	0.82	0.946667	0.956667	32	48	57	33	40	27	33.3333	45.6667	0.38	0.82	1.05	0.65	0.93	0.63	0.736667	0.75	0.23813	0.506532	0.872763
100045469	'Gm14204'	lncRNA	0.01	0	0	0	0.01	0.04	0.0166667	0.00333333	2	0	0	0	1	1	0.666667	0.666667	0.01	0	0	0	0	0.03	0.01	0.00333333	-0.151997	0.955621	0.975955
100047123	'Gm15743'	lncRNA	0.07	0	0.05	0.02	0.02	0.05	0.03	0.04	3	0	2	1	1	2	1.33333	1.66667	0.06	0	0.04	0.02	0.02	0.04	0.0266667	0.0333333	0.115707	0.944383	0.975955
100047133	'Gm16894'	lncRNA	0	0.02	0	0	0	0	0	0.00666667	0	1	0	0	0	0	0	0.333333	0	0.02	0	0	0	0	0	0.00666667	0.747384	0.854672	0.952328
100047482	'Pitpnm2os2'	lncRNA	0.14	0.13	0.02	0.08	0.19	0.17	0.146667	0.0966667	8.89	8.01	1.33	5.24	11.62	10	8.95333	6.07667	0.12	0.1	0.02	0.07	0.15	0.13	0.116667	0.08	-0.804198	0.353968	0.728586
100048701	'AI847159'	lncRNA	0	0.41	0.01	0	0.05	0	0.0166667	0.14	0	6.2	0.2	0	1	0	0.333333	2.13333	0	0.32	0.01	0	0.04	0	0.0133333	0.11	2.25345	0.430105	0.806632
100048895	'9330020H09Rik'	lncRNA	1.09	1.18	1.31	1.06	1.28	1.23	1.19	1.19333	59	61	66	59	67	64	63.3333	62	0.9	0.93	1.02	0.87	0.98	0.95	0.933333	0.95	-0.244233	0.334716	0.708295
100048985	'Gm14321'	lncRNA	0.56	1.12	0.95	0.56	0.82	0.71	0.696667	0.876667	9	16	13	9	12	11	10.6667	12.6667	0.46	0.88	0.74	0.45	0.62	0.55	0.54	0.693333	0.0335813	0.953761	0.975955
100049161	'Gm13032'	lncRNA
100093714	'Gm12296'	lncRNA
100125339	'A230020J21Rik'	lncRNA	0.25	0.12	0.12	0.06	0.06	0.16	0.0933333	0.163333	5.18	2.53	2.52	1	1	3.47	1.82333	3.41	0.2	0.09	0.1	0.05	0.05	0.12	0.0733333	0.13	0.641759	0.625555	0.938979
100125594	'LOC100125594'	lncRNA	0.07	0.03	0.08	0.07	0.1	0.1	0.09	0.06	5.26	2.47	5.61	5.15	7.84	7.24	6.74333	4.44667	0.06	0.03	0.06	0.05	0.08	0.08	0.07	0.05	-0.870518	0.315213	0.686033
100125929	'0610009E02Rik'	lncRNA	1.17	1.74	1.34	1.32	0.79	0.98	1.03	1.41667	20	29	24	24	15	16	18.3333	24.3333	0.96	1.37	1.05	1.08	0.61	0.76	0.816667	1.12667	0.183063	0.689901	0.952328
100126034	'Gm10644'	lncRNA	1.6	2.31	1.99	1.5	2.41	1.47	1.79333	1.96667	30	38	31	30	42	24	32	33	1.31	1.82	1.55	1.22	1.85	1.14	1.40333	1.56	-0.163123	0.661512	0.952328
100126203	'6820426E19Rik'	lncRNA
100126224	'Gm11747'	lncRNA	0.17	0.15	0.16	0.13	0.23	0.22	0.193333	0.16	14	12	13	13	18	20	17	13	0.14	0.12	0.12	0.11	0.17	0.17	0.15	0.126667	-0.596455	0.240756	0.583402
100126227	'Gm13031'	lncRNA	0.04	0	0	0	0	0	0	0.0133333	1	0	0	0	0	0	0	0.333333	0.03	0	0	0	0	0	0	0.01	0.747384	0.854672	0.952328
100126229	'Gm12758'	lncRNA	0.28	0.13	0.22	0	0.17	0.37	0.18	0.21	7	3	5	0	4	9	4.33333	5	0.23	0.1	0.17	0	0.13	0.29	0.14	0.166667	0.0109086	0.992418	0.995931
100126242	'Frs3os'	lncRNA	0.04	0	0	0	0	0	0	0.0133333	1	0	0	0	0	0	0	0.333333	0.03	0	0	0	0	0	0	0.01	0.747384	0.854672	0.952328
100126269	'BC048602'	lncRNA
100126692	'B020018J22Rik'	lncRNA
100126795	'Gm10575'	lncRNA	0.13	0.08	0.16	0.06	0.08	0.06	0.0666667	0.123333	7	4	8	3	4	3	3.33333	6.33333	0.11	0.06	0.13	0.04	0.06	0.05	0.05	0.1	0.716794	0.42646	0.803473
100127433	'Gm11532'	lncRNA	0.01	0.01	0.03	0.02	0.01	0.02	0.0166667	0.0166667	1	1	4	3	1	3	2.33333	2	0.01	0.01	0.02	0.02	0.01	0.02	0.0166667	0.0133333	-0.465525	0.731118	0.952328
100165	'AI507597'	lncRNA	0.26	0.13	0.33	0.57	0.56	0.59	0.573333	0.24	12	4	14	27	25	26	26	10	0.21	0.1	0.25	0.46	0.43	0.45	0.446667	0.186667	-1.59448	0.00337494	0.0241438
100169874	'Gm11110'	lncRNA	0.14	0	0.08	0.14	0	0	0.0466667	0.0733333	2	0	1	2	0	0	0.666667	1	0.12	0	0.06	0.11	0	0	0.0366667	0.06	0.336673	0.89448	0.970808
100174921	'4930505N22Rik'	lncRNA	0.2	0.07	0.15	0.13	0.14	0.07	0.113333	0.14	3	1	2	2	2	1	1.66667	2	0.17	0.06	0.11	0.11	0.11	0.05	0.09	0.113333	0.057251	0.967205	0.98172
100196896	'BC048559'	lncRNA
100270707	'Gm14379'	lncRNA	0.09	0.07	0.02	0	0	0.04	0.0133333	0.06	4	3	1	0	0	2	0.666667	2.66667	0.07	0.05	0.02	0	0	0.03	0.01	0.0466667	1.78992	0.330939	0.703589
100271841	'Uckl1os'	lncRNA	0.02	0.12	0.17	0.1	0.12	0.12	0.113333	0.103333	2	5	10	8	7	11	8.66667	5.66667	0.02	0.09	0.13	0.08	0.09	0.09	0.0866667	0.08	-0.844516	0.296015	0.663098
100272219	'AA543186'	lncRNA	0.48	1.13	1.16	0.92	0.87	0.98	0.923333	0.923333	9	20	20	18	16	18	17.3333	16.3333	0.39	0.89	0.9	0.75	0.67	0.76	0.726667	0.726667	-0.310736	0.54707	0.896728
100286843	'Gm16325'	lncRNA	0	0.01	0	0.02	0.01	0.02	0.0166667	0.00333333	0	1	0	2	1	2	1.66667	0.333333	0	0.01	0	0.02	0.01	0.02	0.0166667	0.00333333	-2.4463	0.238147	0.579928
100302648	'Gm11944'	lncRNA	0.41	0.63	0.49	0.32	0.3	0.32	0.313333	0.51	25	36	28	19	17	19	18.3333	29.6667	0.34	0.49	0.38	0.26	0.23	0.24	0.243333	0.403333	0.475792	0.254124	0.60458
100302730	'5830417I10Rik'	lncRNA	4.09	4.95	3.64	3.35	5.36	2.38	3.69667	4.22667	112.14	124.27	99.85	101.5	125.01	91.13	105.88	112.087	3.36	3.91	2.83	2.74	4.1	1.84	2.89333	3.36667	-0.129231	0.561865	0.908421
100303644	'C130080G10Rik'	lncRNA	0	0	0.17	0.05	0.07	0	0.04	0.0566667	0	0	2.45	2	2	0	1.33333	0.816667	0	0	0.13	0.04	0.05	0	0.03	0.0433333	-1.23283	0.603006	0.926559
100303731	'Gm10874'	lncRNA	4.07	2.71	2.74	2.22	3.75	3.94	3.30333	3.17333	90.4	57	56	51.01	81.13	85	72.38	67.8	3.34	2.14	2.13	1.81	2.87	3.05	2.57667	2.53667	-0.296422	0.364583	0.740361
100303738	'D030025P21Rik'	lncRNA	0	0	0.02	0	0.02	0	0.00666667	0.00666667	0	0	1	0	1	0	0.333333	0.333333	0	0	0.01	0	0.01	0	0.00333333	0.00333333	-0.214388	0.957442	0.975955
100313531	'Nkx2-2os'	lncRNA
100316903	'Gm20605'	lncRNA	0	0	0.78	0.67	0.03	0.47	0.39	0.26	0	0	15.75	15.19	0.59	10.03	8.60333	5.25	0	0	0.61	0.55	0.02	0.36	0.31	0.203333	-1.0362	0.744357	0.952328
100379610	'Gm11651'	lncRNA
100380944	'Ino80dos'	lncRNA	6.97	6.86	7.68	4.03	5.15	4.98	4.72	7.17	886	781.82	840.63	460.17	527.99	556.19	514.783	836.15	5.72	5.41	5.97	3.29	3.94	3.85	3.69333	5.7	0.488742	0.000256337	0.0028384
100382	'AW011738'	lncRNA	0.84	1.18	0.79	1.1	0.69	0.69	0.826667	0.936667	38.34	51.23	33.55	51.57	30.56	30.19	37.44	41.04	0.69	0.93	0.61	0.9	0.53	0.53	0.653333	0.743333	-0.0891894	0.8211	0.952328
100415784	'Gm17830'	lncRNA	0	0	0	0.04	0.05	0	0.03	0	0	0	0	0.78	1	0	0.593333	0	0	0	0	0.03	0.04	0	0.0233333	0	-1.17617	0.773161	0.952328
100415787	'Tomm6os'	lncRNA	0.24	0.33	0.09	0.08	0.08	0.24	0.133333	0.22	3	4	1	1	1	3	1.66667	2.66667	0.19	0.26	0.07	0.06	0.06	0.18	0.1	0.173333	0.464791	0.732359	0.952328
100415912	'Gm11665'	lncRNA
100415914	'Gm12505'	lncRNA	0.46	1.07	1.3	1.28	0.98	1.64	1.3	0.943333	47.44	104.77	124.22	134.44	97.89	161.42	131.25	92.1433	0.38	0.84	1.01	1.05	0.75	1.27	1.02333	0.743333	-0.747036	0.0382257	0.161843
100415915	'A530072M11Rik'	lncRNA	1.48	1.85	1.99	1.43	1.95	1.48	1.62	1.77333	59	63.62	67.01	46.82	69.33	48.99	55.0467	63.21	1.22	1.46	1.55	1.17	1.49	1.14	1.26667	1.41	0.00583993	0.983245	0.990193
100415916	'Gm15997'	lncRNA
100416830	'Zfp572'	lncRNA
100417125	'Gm18409'	lncRNA
100473	'BB031773'	lncRNA
100500713	'9530027J09Rik'	lncRNA	0.59	0.76	0.7	0.57	0.63	0.44	0.546667	0.683333	40	49	44	41	42	29	37.3333	44.3333	0.48	0.6	0.54	0.47	0.48	0.34	0.43	0.54	0.0334277	0.918879	0.975955
100502597	'Gm19272'	lncRNA	0.03	0	0	0	0.01	0.02	0.01	0.01	2.05	0	0	0	0.99	1.64	0.876667	0.683333	0.02	0	0	0	0.01	0.02	0.01	0.00666667	0.723411	0.835779	0.952328
100502601	'Gm19276'	lncRNA	0.01	0.01	0	0	0	0	0	0.00666667	1	1	0	0	0	0	0	0.666667	0.01	0.01	0	0	0	0	0	0.00666667	1.65927	0.67916	0.952328
100502602	'Gm19277'	lncRNA	0	0	0	0	0.02	0	0.00666667	0	0	0	0	0	1	0	0.333333	0	0	0	0	0	0.02	0	0.00666667	0	-1.17617	0.773161	0.952328
100502619	'AW046200'	lncRNA	0.3	0.78	1.46	0.41	0.86	0.72	0.663333	0.846667	9	23	30	18	20	24	20.6667	20.6667	0.25	0.61	1.14	0.34	0.66	0.55	0.516667	0.666667	-0.225704	0.666819	0.952328
100502624	'Gm13483'	lncRNA	0.74	0.65	0.54	0.54	0.86	0.57	0.656667	0.643333	39	31	27	30	45	30	35	32.3333	0.61	0.51	0.42	0.44	0.66	0.44	0.513333	0.513333	-0.316255	0.394104	0.77552
100502630	'Gm15545'	lncRNA	3.13	3.66	3.86	1.49	2.22	2.39	2.03333	3.55	89.26	108.81	109.84	54.27	66.58	87	69.2833	102.637	2.57	2.88	3	1.22	1.7	1.85	1.59	2.81667	0.348401	0.18311	0.489518
100502636	'Gm19299'	lncRNA
100502653	'C130060C02Rik'	lncRNA	0.03	0.03	0.06	0.07	0.04	0.01	0.04	0.04	3	3	5	5	4	1	3.33333	3.66667	0.03	0.03	0.04	0.06	0.03	0.01	0.0333333	0.0333333	-0.0831497	0.938244	0.975955
100502695	'Gm17399'	lncRNA	0.26	0.55	0.44	0.43	0.15	0.03	0.203333	0.416667	7	14	11	12	4	1	5.66667	10.6667	0.21	0.43	0.35	0.35	0.12	0.03	0.166667	0.33	0.668954	0.45336	0.825233
100502700	'AV039307'	lncRNA	0.29	0.23	0.56	0.19	0.92	1.15	0.753333	0.36	15.94	12	6.94	10.04	22.58	15.02	15.88	11.6267	0.24	0.18	0.44	0.15	0.71	0.89	0.583333	0.286667	-0.70192	0.248084	0.595045
100502734	'Gm16023'	lncRNA	1.29	1.34	1.25	1.22	1.44	1.07	1.24333	1.29333	86	85	77	83	79.21	68.05	76.7533	82.6667	1.06	1.05	0.97	1	1.1	0.83	0.976667	1.02667	-0.105467	0.662622	0.952328
100502742	'1700007L15Rik'	lncRNA	1.44	1.78	1.8	1.12	1.43	1.83	1.46	1.67333	22	23	24	18	23	27	22.6667	23	1.18	1.4	1.4	0.91	1.09	1.41	1.13667	1.32667	-0.191599	0.64493	0.95177
100502745	'2900009J06Rik'	lncRNA	2.02	1.25	1.82	2.14	1.9	1.91	1.98333	1.69667	30	16	26	31	26	21	26	24	1.66	0.99	1.41	1.75	1.45	1.48	1.56	1.35333	-0.329582	0.456228	0.827552
100502819	'BC065403'	lncRNA	0.09	0	0	0.04	0.09	0.23	0.12	0.03	2	0	0	1	2	5	2.66667	0.666667	0.07	0	0	0.04	0.07	0.18	0.0966667	0.0233333	-2.1874	0.232717	0.57182
100502820	'Gm19395'	lncRNA	0.13	0.07	0	0	0	0	0	0.0666667	2	1	0	0	0	0	0	1	0.11	0.05	0	0	0	0	0	0.0533333	2.25393	0.51587	0.877628
100502829	'Gm9899'	lncRNA	0	0.01	0.01	0.01	0.02	0.02	0.0166667	0.00666667	1	2	2	2	2	2	2	1.66667	0	0.01	0.01	0.01	0.01	0.01	0.01	0.00666667	-0.483426	0.721996	0.952328
100502834	'Gm15972'	lncRNA	0.04	0.05	0	0	0.04	0	0.0133333	0.03	2	2	0	0	2	0	0.666667	1.33333	0.04	0.04	0	0	0.03	0	0.01	0.0266667	0.859641	0.720857	0.952328
100502849	'Gm19412'	lncRNA	0.11	0.18	0.22	0.1	0.36	0.32	0.26	0.17	1	3	4	1	4	5	3.33333	2.66667	0.09	0.14	0.17	0.08	0.27	0.24	0.196667	0.133333	-0.533763	0.651964	0.952328
100502868	'Gm20597'	lncRNA
100502871	'Gm19424'	lncRNA
100502888	'Gm19434'	lncRNA	0	0.06	0	0.03	0.03	0.06	0.04	0.02	0	2	0	1.02	1.22	2.05	1.43	0.666667	0	0.04	0	0.02	0.03	0.04	0.03	0.0133333	-1.22636	0.559933	0.906341
100502917	'Gm12130'	lncRNA
100502920	'Gm16998'	lncRNA	0.46	0.19	0.38	0.48	0.29	0.44	0.403333	0.343333	13	5	10	14	8	12	11.3333	9.33333	0.38	0.15	0.3	0.39	0.22	0.34	0.316667	0.276667	-0.500104	0.451871	0.824021
100502923	'Gm17619'	lncRNA
100502932	'Gm13544'	lncRNA
100502933	'Gm19461'	lncRNA	0.26	0.45	0.35	0.5	0.53	0.33	0.453333	0.353333	12	11	7	18	24	20	20.6667	10	0.22	0.35	0.27	0.41	0.41	0.26	0.36	0.28	-1.25295	0.016279	0.0845478
100502942	'Gm4814'	lncRNA
100502945	'Gm19466'	lncRNA	0.63	0.8	0.71	0.83	0.94	0.78	0.85	0.713333	62	75	65	84	90	74	82.6667	67.3333	0.52	0.63	0.55	0.68	0.72	0.61	0.67	0.566667	-0.509868	0.0357483	0.153872
100502959	'AV051173'	lncRNA	0.14	0.17	0.06	0	0.05	0.1	0.05	0.123333	3.27	4.95	1	0	2.66	3.11	1.92333	3.07333	0.11	0.14	0.05	0	0.04	0.07	0.0366667	0.1	0.485217	0.738559	0.952328
100503007	'Gm19500'	lncRNA	0.04	0.03	0.03	0.06	0.03	0.02	0.0366667	0.0333333	2	3	3	6	3	2	3.66667	2.66667	0.03	0.03	0.03	0.05	0.02	0.02	0.03	0.03	-0.690258	0.528893	0.882465
100503019	'Gm16551'	lncRNA	8.8	26.42	59.07	17.16	20.64	17.32	18.3733	31.43	582.89	1742.15	3849.35	1132.73	1312	1099.69	1181.47	2058.13	7.23	20.83	45.93	14.01	15.79	13.39	14.3967	24.6633	0.568098	0.415212	0.793267
100503033	'Gm19519'	lncRNA
100503040	'Gm19522'	lncRNA	5.15	5.99	7.94	2.19	3.65	5.27	3.70333	6.36	97	121	154	74	91	120.01	95.0033	124	4.23	4.72	6.17	1.78	2.8	4.07	2.88333	5.04	0.166089	0.537499	0.888539
100503044	'A730020M07Rik'	lncRNA	0	0	0	0.11	0	0	0.0366667	0	0	0	0	2	0	0	0.666667	0	0	0	0	0.09	0	0	0.03	0	-2.13576	0.596345	0.923935
100503072	'Gm16291'	lncRNA	0.19	0.19	0.14	0.22	0.08	0.4	0.233333	0.173333	13	12	9	15	5	26	15.3333	11.3333	0.16	0.15	0.11	0.18	0.06	0.31	0.183333	0.14	-0.666099	0.335656	0.709226
100503074	'2610016A17Rik'	lncRNA	0.13	0	0	0.12	0.08	0.13	0.11	0.0433333	1	0	0	1	1	1	1	0.333333	0.1	0	0	0.1	0.06	0.1	0.0866667	0.0333333	-1.69594	0.471359	0.842497
100503099	'Gm19554'	lncRNA
100503104	'Gm19557'	lncRNA	0	0.06	0.23	0.1	0.11	0.11	0.106667	0.0966667	0	1	4	2	2	2	2	1.66667	0	0.04	0.18	0.08	0.08	0.08	0.08	0.0733333	-0.498843	0.745621	0.952328
100503106	'Gm13944'	lncRNA
100503120	'A930006K02Rik'	lncRNA	0.47	0.42	0.43	0.12	0.38	0.56	0.353333	0.44	33	28	30	12	22	30	21.3333	30.3333	0.38	0.33	0.34	0.1	0.29	0.43	0.273333	0.35	0.301081	0.501051	0.869314
100503142	'B230303A05Rik'	lncRNA	3.25	2.71	2.76	2.79	3.12	3.38	3.09667	2.90667	228.51	188.23	183.46	210.56	222.18	230.02	220.92	200.067	2.67	2.14	2.15	2.28	2.39	2.61	2.42667	2.32	-0.355503	0.0499596	0.19735
100503147	'Gm13293'	lncRNA
100503157	'Gm15471'	lncRNA	0.04	0.03	0	0.13	0.1	0	0.0766667	0.0233333	1	1	0	3	3	0	2	0.666667	0.03	0.02	0	0.11	0.07	0	0.06	0.0166667	-1.78433	0.361179	0.737299
100503167	'Gm13752'	lncRNA
100503178	'2810013P06Rik'	lncRNA	7.35	7.31	8.47	4.21	6.19	5.8	5.4	7.71	375	356	402	220	306	284	270	377.667	6.04	5.76	6.59	3.43	4.73	4.49	4.21667	6.13	0.275172	0.0784711	0.274891
100503184	'Gm19583'	lncRNA
100503190	'Gm19585'	lncRNA	0.1	0.08	0.5	0.02	0.42	0.21	0.216667	0.226667	3	2	3	1	4	6	3.66667	2.66667	0.08	0.06	0.39	0.01	0.32	0.16	0.163333	0.176667	-0.661453	0.559441	0.906064
100503197	'Gm19589'	lncRNA	0	0	0.03	0.02	0.92	0.03	0.323333	0.01	0	0	1	1	1	1	1	0.333333	0	0	0.02	0.02	0.7	0.02	0.246667	0.00666667	-1.69595	0.472687	0.842553
100503199	'5430416N02Rik'	lncRNA	7.05	8.49	9.4	5.95	5.64	6.41	6	8.31333	319.18	327.89	347.93	270.09	258.05	295.78	274.64	331.667	5.79	6.7	7.31	4.85	4.31	4.96	4.70667	6.6	0.0536321	0.721321	0.952328
100503248	'Gm15179'	lncRNA
100503265	'Gm19619'	lncRNA	13.73	12.47	15.99	2.24	3.55	3.52	3.10333	14.0633	163	131	187	30	46	42	39.3333	160.333	11.27	9.83	12.44	1.83	2.71	2.72	2.42	11.18	1.81834	1.12612e-11	8.11171e-10
100503272	'Gm11423'	lncRNA	2.31	1.58	2.1	2.01	2.48	2.07	2.18667	1.99667	61	43	57	56	62	49	55.6667	53.6667	1.9	1.25	1.63	1.64	1.9	1.6	1.71333	1.59333	-0.263113	0.371355	0.747987
100503289	'Gm14133'	lncRNA
100503307	'Gm15408'	lncRNA	11.51	11.4	8.77	2.13	3.35	2	2.49333	10.56	333	306	218	59	96	61	72	285.667	9.46	8.99	6.82	1.74	2.56	1.55	1.95	8.42333	1.78966	9.10031e-12	6.68058e-10
100503337	'Gm9895'	lncRNA	3.27	1.75	0.67	1.52	1.7	1.55	1.59	1.89667	27	23	10	23	20	20	21	20	2.69	1.38	0.52	1.24	1.3	1.2	1.24667	1.53	-0.279661	0.584502	0.923011
100503338	'Gm14636'	lncRNA	2.58	3.95	5.05	2.21	2.86	3.21	2.76	3.86	203	251	239	156	216	207	193	231	2.12	3.11	3.93	1.81	2.19	2.48	2.16	3.05333	0.048076	0.787996	0.952328
100503378	'Gm15638'	lncRNA	5.43	4.89	4.1	5.48	5.77	8.99	6.74667	4.80667	167	167	146	234	250	402	295.333	160	4.46	3.85	3.19	4.47	4.41	6.95	5.27667	3.83333	-1.09945	9.65137e-06	0.000173425
100503380	'Snhg4'	lncRNA	23.01	22.62	22.54	47.32	30.78	47.54	41.88	22.7233	332	313	317	693	429	643	588.333	320.667	18.9	17.83	17.53	38.61	23.54	36.75	32.9667	18.0867	-1.10228	8.40098e-07	2.06712e-05
100503392	'4833438C02Rik'	lncRNA	1.36	1.57	1.8	0.6	0.86	0.75	0.736667	1.57667	68	75	84	31	42	36	36.3333	75.6667	1.11	1.24	1.4	0.49	0.66	0.58	0.576667	1.25	0.846502	0.00276289	0.0204515
100503393	'Gm14827'	lncRNA	0.21	0.39	0.14	0.25	0.21	0.29	0.25	0.246667	16.53	24	11	20	18	21	19.6667	17.1767	0.17	0.31	0.11	0.21	0.16	0.22	0.196667	0.196667	-0.426569	0.391674	0.773077
100503427	'Gm10390'	lncRNA	0.24	0.4	0.15	0.09	0.23	0.05	0.123333	0.263333	27	44	16	10	25	5	13.3333	29	0.19	0.32	0.12	0.07	0.17	0.04	0.0933333	0.21	0.934764	0.148341	0.42629
100503434	'Gm19689'	lncRNA
100503447	'Gm19696'	lncRNA	11.97	12.09	10.4	14.96	19.35	18.6	17.6367	11.4867	304	283	224	404	502.02	499	468.34	270.333	9.83	9.53	8.08	12.21	14.8	14.38	13.7967	9.14667	-1.00015	1.75901e-08	6.80319e-07
100503460	'Gm19705'	lncRNA	0.17	0.02	0.37	0.25	0	0.33	0.193333	0.186667	4.9	0.45	7.83	5	0	5.13	3.37667	4.39333	0.14	0.02	0.29	0.21	0	0.25	0.153333	0.15	-0.117046	0.937327	0.975955
100503468	'Gm14023'	lncRNA	0.89	0.52	0.67	0.15	0.32	0.49	0.32	0.693333	21.6	17.17	18.25	3.43	7.41	12.7	7.84667	19.0067	0.73	0.41	0.52	0.12	0.25	0.38	0.25	0.553333	1.1415	0.0715494	0.257655
100503469	'Gm19710'	lncRNA	0.14	0	0.15	0	0	0.14	0.0466667	0.0966667	1	0	1	0	0	1	0.333333	0.666667	0.11	0	0.12	0	0	0.1	0.0333333	0.0766667	0.687306	0.816265	0.952328
100503470	'Gm16619'	lncRNA	0	0	0	0	0.04	0	0.0133333	0	0	0	0	0	1	0	0.333333	0	0	0	0	0	0.03	0	0.01	0	-1.17617	0.773161	0.952328
100503474	'Platr22'	lncRNA	0.05	0.24	0.12	0.02	0.08	0	0.0333333	0.136667	2	7	3	1	2	0	1	4	0.04	0.19	0.09	0.02	0.06	0	0.0266667	0.106667	1.7955	0.217494	0.549884
100503481	'4930453H23Rik'	lncRNA
100503490	'Gm19723'	lncRNA
100503498	'Gm16675'	lncRNA	0.96	1.34	1.07	0.72	0.53	1.07	0.773333	1.12333	35.62	47.61	36.96	27.75	19.32	38.45	28.5067	40.0633	0.78	1.06	0.83	0.59	0.41	0.83	0.61	0.89	0.26669	0.508715	0.874161
100503518	'Gm11827'	lncRNA	1.75	0.68	0.96	0.43	0.33	0.9	0.553333	1.13	26	16	22	16	9	11	12	21.3333	1.44	0.54	0.75	0.35	0.25	0.7	0.433333	0.91	0.609527	0.251045	0.600041
100503530	'Gm11351'	lncRNA
100503536	'Gm19757'	lncRNA	0	0	0.1	0.09	0	0.07	0.0533333	0.0333333	0	0	1.01	1	0	0.76	0.586667	0.336667	0	0	0.08	0.07	0	0.05	0.04	0.0266667	-0.214388	0.95654	0.975955
100503538	'Gm15941'	lncRNA	0.9	1.75	1.5	0.75	3.2	2	1.98333	1.38333	10	17	14	9	34	22	21.6667	13.6667	0.74	1.38	1.16	0.61	2.45	1.55	1.53667	1.09333	-0.859384	0.138754	0.407774
100503565	'Gm9926'	lncRNA	0.01	0	0.01	0	0	0	0	0.00666667	1	0	1	0	0	0	0	0.666667	0.01	0	0.01	0	0	0	0	0.00666667	1.65007	0.681532	0.952328
100503580	'Gm19782'	lncRNA	0	0	0	0	0.01	0.02	0.01	0	0	0	0	0	1	1.5	0.833333	0	0	0	0	0	0.01	0.02	0.01	0	-2.04168	0.596122	0.923935
100503582	'Gm19784'	lncRNA
100503592	'A330076C08Rik'	lncRNA
100503595	'Gm13003'	lncRNA
100503613	'5031434C07Rik'	lncRNA	0.11	0.1	0.14	0.07	0.04	0.05	0.0533333	0.116667	9	8	11	6	3	4	4.33333	9.33333	0.09	0.08	0.11	0.06	0.03	0.04	0.0433333	0.0933333	0.881484	0.255766	0.606483
100503619	'E330011O21Rik'	lncRNA	5.71	4.36	5.75	0.86	1.72	1.72	1.43333	5.27333	140	106	140	21	43	39	34.3333	128.667	4.69	3.44	4.47	0.71	1.32	1.33	1.12	4.2	1.70286	3.04695e-08	1.11655e-06
100503622	'Gm16630'	lncRNA	0.13	0.1	0.12	0.14	0.16	0.22	0.173333	0.116667	16.49	13.07	14.09	16	18.82	23.96	19.5933	14.55	0.1	0.08	0.09	0.11	0.12	0.17	0.133333	0.09	-0.619024	0.202902	0.523473
100503636	'1700123M08Rik'	lncRNA	0.16	0.26	0.72	0.13	0.1	0.12	0.116667	0.38	11	15	22	13	5	8	8.66667	16	0.13	0.21	0.56	0.1	0.08	0.1	0.0933333	0.3	0.647067	0.311933	0.682415
100503652	'Gm16845'	lncRNA	0.56	0.28	0.44	0.18	0.3	0.45	0.31	0.426667	25	12	18	8	13	19	13.3333	18.3333	0.46	0.22	0.34	0.14	0.23	0.34	0.236667	0.34	0.255492	0.655544	0.952328
100503676	'Gm38426'	lncRNA	8.05	7.8	7.03	5.23	6.54	3.78	5.18333	7.62667	62	54	63	47	57	37	47	59.6667	6.61	6.15	5.46	4.27	5	2.93	4.06667	6.07333	0.134885	0.647481	0.952328
100503704	'Gm16861'	lncRNA	0.15	0.21	0.14	0.05	0.13	0.24	0.14	0.166667	6	8	5	2	5	9	5.33333	6.33333	0.12	0.17	0.11	0.04	0.1	0.18	0.106667	0.133333	0.0398947	0.963286	0.979233
100503727	'1700011B04Rik'	lncRNA
100503751	'Gm19872'	lncRNA
100503759	'Gm5084'	lncRNA
100503783	'Gm17733'	lncRNA
100503794	'Gm9920'	lncRNA	0.71	0.51	1.09	0.51	0.37	0.76	0.546667	0.77	24	16	20	17	7	14	12.6667	20	0.58	0.4	0.85	0.42	0.28	0.59	0.43	0.61	0.432903	0.43438	0.810252
100503799	'Gm7931'	lncRNA
100503802	'Gm10419'	lncRNA
100503812	'3300002A11Rik'	lncRNA	2.17	2.08	2.31	1.25	1.57	1.55	1.45667	2.18667	118	108	117	66	83	81	76.6667	114.333	1.78	1.64	1.8	1.02	1.2	1.2	1.14	1.74	0.365924	0.0964145	0.316294
100503816	'Gm16548'	lncRNA	10.35	10.57	6.63	10.63	9.34	10.56	10.1767	9.18333	232	219	136	285	224	260	256.333	195.667	8.5	8.33	5.15	8.68	7.14	8.17	7.99667	7.32667	-0.605326	0.0174609	0.0890863
100503823	'Gm16973'	lncRNA	1.22	1.43	1.6	1.33	1.51	1.84	1.56	1.41667	63	79	80	74	78	94	82	74	1	1.13	1.24	1.08	1.15	1.42	1.21667	1.12333	-0.365555	0.141489	0.413007
100503827	'Tnfsf13os'	lncRNA	1.18	1.82	0.95	0.09	0.22	0.25	0.186667	1.31667	13.86	17	10.67	4.64	2	3	3.21333	13.8433	0.97	1.44	0.74	0.07	0.17	0.2	0.146667	1.05	1.93134	0.0146922	0.0782954
100503830	'Gm11762'	lncRNA	0	0	0.03	0	0	0	0	0.01	0	0	1	0	0	0	0	0.333333	0	0	0.02	0	0	0	0	0.00666667	0.747384	0.854672	0.952328
100503849	'Sp3os'	lncRNA	4.53	5.84	2.63	5.7	2.32	2.19	3.40333	4.33333	81.95	103.65	79.65	119.73	113.19	132.11	121.677	88.4167	3.72	4.61	2.05	4.65	1.78	1.69	2.70667	3.46	-0.686147	0.00269875	0.020094
100503859	'1110015O18Rik'	lncRNA
100503868	'Gm19935'	lncRNA	0.05	0.17	0.51	0.05	0.08	0	0.0433333	0.243333	1	3	9	1	2	0	1	4.33333	0.04	0.13	0.4	0.04	0.06	0	0.0333333	0.19	1.89923	0.212259	0.54054
100503869	'Mkln1os'	lncRNA	0.45	1	1.28	1.2	0.99	1	1.06333	0.91	28	36	50	33	51	49	44.3333	38	0.37	0.79	0.99	0.98	0.75	0.77	0.833333	0.716667	-0.435515	0.219854	0.553697
100503872	'Hotair'	lncRNA
100503882	'Gm17308'	lncRNA
100503961	'Gm19990'	lncRNA
100503962	'Gm16701'	lncRNA	0.05	0.11	0.15	0.05	0.03	0	0.0266667	0.103333	2	4	5	2	1	0	1	3.66667	0.04	0.09	0.11	0.04	0.02	0	0.02	0.08	1.64209	0.256757	0.607832
100503969	'1810008I18Rik'	lncRNA	37.56	26.97	19.08	19.14	20.97	21.39	20.5	27.87	2680	1826.02	1269	1385.93	1426	1460.78	1424.24	1925.01	30.85	21.26	14.84	15.62	16.04	16.54	16.0667	22.3167	0.231254	0.357476	0.732828
100504007	'Gm15787'	lncRNA	1.07	0.4	0.6	0.94	1.82	1.03	1.26333	0.69	5	3	4	5	9.8	3	5.93333	4	0.88	0.32	0.46	0.76	1.39	0.8	0.983333	0.553333	-0.698424	0.442989	0.817505
100504026	'Gm16157'	lncRNA	4.98	4.44	5.02	5.24	4.76	8.03	6.01	4.81333	119	97	112	128	113	182	141	109.333	4.09	3.5	3.91	4.28	3.64	6.21	4.71	3.83333	-0.585052	0.024426	0.115245
100504029	'Gm16740'	lncRNA	1.82	2.3	2.47	1.77	2.76	2.47	2.33333	2.19667	33	41	42	35	48	44	42.3333	38.6667	1.49	1.82	1.92	1.44	2.11	1.91	1.82	1.74333	-0.342606	0.282461	0.643774
100504049	'Gm15559'	lncRNA	0.04	0.05	0.05	0.04	0.05	0.05	0.0466667	0.0466667	3	3	3	3	3	3	3	3	0.04	0.04	0.04	0.04	0.03	0.04	0.0366667	0.04	-0.214591	0.840707	0.952328
100504056	'Gm20036'	lncRNA	0.59	0.43	0.54	0.72	0.9	0.64	0.753333	0.52	14	10	12	18	21	15	18	12	0.48	0.34	0.42	0.59	0.69	0.49	0.59	0.413333	-0.793726	0.12059	0.371029
100504069	'Gm15915'	lncRNA	0	0	0.05	0	0	0	0	0.0166667	0	0	1	0	0	0	0	0.333333	0	0	0.04	0	0	0	0	0.0133333	0.747384	0.854672	0.952328
100504101	'Gm20063'	lncRNA
100504104	'Gm16062'	lncRNA	1.51	0.98	0.86	1.08	0.4	0.61	0.696667	1.11667	23	14	12	17	6	9	10.6667	16.3333	1.24	0.77	0.67	0.88	0.31	0.47	0.553333	0.893333	0.389829	0.543128	0.893204
100504114	'Gm16907'	lncRNA	3.69	9.65	4.43	5.81	2.8	4.12	4.24333	5.92333	13	27	15	23	12	15	16.6667	18.3333	3.03	7.61	3.45	4.74	2.14	3.18	3.35333	4.69667	-0.0934553	0.864558	0.957196
100504121	'Med9os'	lncRNA	0	0	0.19	0	0	0	0	0.0633333	0	0	1	0	0	0	0	0.333333	0	0	0.15	0	0	0	0	0.05	0.747384	0.854672	0.952328
100504140	'4930412M03Rik'	lncRNA	0.79	0.53	0.94	0.47	1.15	0.34	0.653333	0.753333	12	7	12	7	16	5	9.33333	10.3333	0.65	0.42	0.73	0.38	0.88	0.27	0.51	0.6	-0.0454351	0.948104	0.975955
100504145	'Platr30'	lncRNA	0.03	0	0.06	0	0.06	0	0.02	0.03	1	0	2	0	2	0	0.666667	1	0.02	0	0.05	0	0.05	0	0.0166667	0.0233333	0.427205	0.867743	0.95807
100504169	'Gm20098'	lncRNA
100504178	'Dhrs13os'	lncRNA	0.03	0	0.03	0.08	0.06	0.05	0.0633333	0.02	2	0	2	5	4	3	4	1.33333	0.03	0	0.03	0.06	0.05	0.04	0.05	0.02	-1.80011	0.164419	0.45493
100504184	'Gm16336'	lncRNA
100504191	'Gm16576'	lncRNA	0.79	0.93	0.95	0.47	0.43	0.44	0.446667	0.89	83	77	65	47	41	42	43.3333	75	0.65	0.73	0.74	0.38	0.33	0.34	0.35	0.706667	0.577075	0.0439101	0.179351
100504202	'Gm20110'	lncRNA	0	0	0	0	0.04	0	0.0133333	0	0	0	0	0	2	0	0.666667	0	0	0	0	0	0.03	0	0.01	0	-1.99477	0.621905	0.93646
100504231	'Gm15708'	lncRNA	0.57	0.54	0.61	0.33	0.3	0.29	0.306667	0.573333	22.02	20.62	22.55	13.03	11.86	10.81	11.9	21.73	0.47	0.43	0.48	0.27	0.23	0.22	0.24	0.46	0.696389	0.159435	0.446452
100504235	'Gm20125'	lncRNA	0	0.1	0.22	0	0.02	0	0.00666667	0.106667	0	3	8	0	1	0	0.333333	3.66667	0	0.08	0.17	0	0.01	0	0.00333333	0.0833333	3.11436	0.13968	0.409528
100504249	'Gm15350'	lncRNA
100504255	'Gm12159'	lncRNA	0	0	0	0	0	0.03	0.01	0	0	0	0	0	0	1	0.333333	0	0	0	0	0	0	0.02	0.00666667	0	-1.17617	0.773161	0.952328
100504262	'A730020E08Rik'	lncRNA
100504265	'Gm20139'	lncRNA
100504267	'Trp53cor1'	lncRNA	0.1	0.1	0.1	0.03	0.09	0.04	0.0533333	0.1	8	7	7	2	4	3	3	7.33333	0.09	0.07	0.08	0.02	0.07	0.03	0.04	0.08	1.08586	0.218406	0.551562
100504291	'Gm16618'	lncRNA	0.1	0.05	0	0	0.05	0	0.0166667	0.05	2	1	0	0	1	0	0.333333	1	0.08	0.04	0	0	0.04	0	0.0133333	0.04	1.28971	0.636205	0.946887
100504304	'Gm20161'	lncRNA
100504308	'Gm15473'	lncRNA	0.04	0.04	0	0.04	0.04	0	0.0266667	0.0266667	1	1	0	1	1	0	0.666667	0.666667	0.03	0.03	0	0.03	0.03	0	0.02	0.02	-0.197961	0.934512	0.975955
100504312	'Gm17597'	lncRNA	0.5	0.24	0.36	0	0.1	0	0.0333333	0.366667	15	7	10	0	3	0	1	10.6667	0.41	0.19	0.28	0	0.08	0	0.0266667	0.293333	3.24061	0.00852281	0.05093
100504333	'Gm16712'	lncRNA	0.02	0.04	0.04	0	0.02	0.04	0.02	0.0333333	1	2	2	0	1	2	1	1.66667	0.02	0.03	0.03	0	0.02	0.03	0.0166667	0.0266667	0.526312	0.759621	0.952328
100504347	'Gm20187'	lncRNA
100504350	'Gm14169'	lncRNA
100504360	'D730003I15Rik'	lncRNA	2.69	2.4	3.25	0.94	0.89	1.13	0.986667	2.78	65	68	82	21	30	27	26	71.6667	2.21	1.89	2.53	0.77	0.68	0.87	0.773333	2.21	1.25106	6.54901e-05	0.000889491
100504375	'Gm15880'	lncRNA	0.07	0.06	0.06	0.04	0	0.04	0.0266667	0.0633333	5	4	4	3	0	3	2	4.33333	0.06	0.04	0.04	0.03	0	0.03	0.02	0.0466667	0.878142	0.467729	0.839284
100504399	'C130021I20Rik'	lncRNA
100504412	'Kcnmb4os2'	lncRNA	0	0.05	0	0.04	0	0	0.0133333	0.0166667	0	1	0	1	0	0	0.333333	0.333333	0	0.04	0	0.03	0	0	0.01	0.0133333	-0.214388	0.956441	0.975955
100504421	'2900076A07Rik'	lncRNA	5.39	6.69	7.3	4.57	5.25	4.58	4.8	6.46	258	289	300	215	219	169	201	282.333	4.43	5.28	5.68	3.73	4.01	3.54	3.76	5.13	0.274732	0.107333	0.340867
100504425	'Tincr'	lncRNA	0.36	0.38	0.4	0.01	0.63	0.18	0.273333	0.38	6.99	5	6.99	1.99	11	2	4.99667	6.32667	0.29	0.3	0.31	0.01	0.48	0.14	0.21	0.3	0.111432	0.913807	0.975955
100504457	'4921513H07Rik'	lncRNA
100504464	'E230016K23Rik'	lncRNA	0.37	0.36	0.34	0.27	0.59	0.39	0.416667	0.356667	27.73	24.9	23.03	20.47	42	27.05	29.84	25.22	0.31	0.28	0.26	0.22	0.45	0.3	0.323333	0.283333	-0.464416	0.265983	0.619835
100504467	'Gm16596'	lncRNA	0.03	0.03	0.03	0.03	0.06	0.06	0.05	0.03	1	1	1	1	2	2	1.66667	1	0.02	0.02	0.02	0.02	0.05	0.05	0.04	0.02	-0.942523	0.554445	0.902281
100504477	'Gm16677'	lncRNA	0.01	0.03	0.06	0.04	0.02	0	0.02	0.0333333	1	2	3.9	3	1.01	0	1.33667	2.3	0.01	0.02	0.05	0.03	0.01	0	0.0133333	0.0266667	0.339795	0.832901	0.952328
100504486	'Gdap10'	lncRNA	5.43	4.82	7.38	2.11	3.7	4.64	3.48333	5.87667	733	623	930	291	483	598	457.333	762	4.46	3.8	5.74	1.73	2.83	3.59	2.71667	4.66667	0.527424	0.0353253	0.152519
100504512	'4930426I24Rik'	lncRNA	0.44	0.43	0.06	0.18	0.41	0.3	0.296667	0.31	6	8	1	3	9	7	6.33333	5	0.36	0.34	0.04	0.15	0.32	0.23	0.233333	0.246667	-0.530312	0.577834	0.918486
100504525	'Gm20268'	lncRNA
100504539	'Gm20275'	lncRNA	5.59	6	5.67	8.52	8.11	9.68	8.77	5.75333	199.88	205.03	188.58	307	281.48	327.7	305.393	197.83	4.59	4.73	4.41	6.95	6.2	7.48	6.87667	4.57667	-0.84532	4.74128e-07	1.25842e-05
100504549	'AI463170'	lncRNA	2.92	2.21	2.57	1.93	3.18	3.06	2.72333	2.56667	43	23	30	34	37	42	37.6667	32	2.39	1.75	2	1.58	2.43	2.37	2.12667	2.04667	-0.44359	0.247182	0.593415
100504561	'9230112J17Rik'	lncRNA	0	0	0.04	0	0	0	0	0.0133333	0	0	1	0	0	0	0	0.333333	0	0	0.03	0	0	0	0	0.01	0.747384	0.854672	0.952328
100504568	'Gm17634'	lncRNA	0.64	0.97	0.6	0.13	0.24	0.99	0.453333	0.736667	12	20	9	4	7	16	9	13.6667	0.52	0.77	0.47	0.11	0.19	0.77	0.356667	0.586667	0.389722	0.585246	0.923701
100504589	'Gm11454'	lncRNA	0.05	0	0	0	0	0	0	0.0166667	1	0	0	0	0	0	0	0.333333	0.04	0	0	0	0	0	0	0.0133333	0.747384	0.854672	0.952328
100504591	'Gm15987'	lncRNA	0.03	0.19	0.15	0.06	0.03	0.02	0.0366667	0.123333	2	11	9	4	2	1	2.33333	7.33333	0.03	0.15	0.12	0.05	0.03	0.01	0.03	0.1	1.41321	0.189823	0.501216
100504594	'A630012P03Rik'	lncRNA	0	0.04	0.02	0	0	0	0	0.02	0	2	1	0	0	0	0	1	0	0.03	0.02	0	0	0	0	0.0166667	2.20925	0.52835	0.882465
100504601	'Gm16702'	lncRNA	0.06	0.16	0.23	0.11	0.17	0.15	0.143333	0.15	3.99	9.41	13.41	6.94	10.13	8.91	8.66	8.93667	0.05	0.13	0.18	0.09	0.13	0.12	0.113333	0.12	-0.159203	0.833226	0.952328
100504616	'Gm15910'	lncRNA	0.04	0.03	0.05	0.05	0.08	0.03	0.0533333	0.04	3.02	2.24	3.51	3.92	6.09	2.01	4.00667	2.92333	0.03	0.02	0.04	0.04	0.06	0.02	0.04	0.03	-0.656119	0.547704	0.897098
100504626	'Gm16364'	lncRNA	0.03	0.03	0	0	0.03	0.49	0.173333	0.02	1	1	0	0	1	2	1	0.666667	0.02	0.02	0	0	0.03	0.38	0.136667	0.0133333	-0.775411	0.729285	0.952328
100504628	'Gm20319'	lncRNA	79.36	58.32	63.16	17.76	29.87	28.76	25.4633	66.9467	2719	1928	2047	590	939	870	799.667	2231.33	65.19	45.98	49.11	14.49	22.85	22.23	19.8567	53.4267	1.28102	2.36099e-10	1.33014e-08
100504637	'Gm20324'	lncRNA	0.37	0.43	0.35	0.4	0.52	0.28	0.4	0.383333	8	9	7	9	11	6	8.66667	8	0.3	0.34	0.27	0.32	0.39	0.22	0.31	0.303333	-0.324035	0.630974	0.943592
100504641	'1700101I11Rik'	lncRNA	0.07	0.07	0.09	0.04	0.09	0.15	0.0933333	0.0766667	5	5	6	3	6	10	6.33333	5.33333	0.06	0.06	0.07	0.03	0.07	0.11	0.07	0.0633333	-0.458644	0.583602	0.922311
100504653	'4930555A03Rik'	lncRNA	0.13	0.12	0.05	0.01	0.03	0.05	0.03	0.1	5	1	5	1	3	5	3	3.66667	0.11	0.09	0.04	0.01	0.03	0.04	0.0266667	0.08	0.0870725	0.940408	0.975955
100504661	'Gm20337'	lncRNA	0.39	0.49	0.55	0.44	0.55	0.52	0.503333	0.476667	13.08	14	16	15	18	16.02	16.34	14.36	0.32	0.38	0.43	0.36	0.42	0.4	0.393333	0.376667	-0.401628	0.4131	0.791848
100504687	'2810029C07Rik'	lncRNA	0.15	0.16	0.24	0.18	0.13	0.07	0.126667	0.183333	5	6	11	4	8	5	5.66667	7.33333	0.12	0.12	0.18	0.15	0.1	0.05	0.1	0.14	0.162702	0.837406	0.952328
100504692	'Gm20356'	lncRNA
100504701	'Gm20362'	lncRNA	0.09	0.14	0.19	0.06	0.05	0	0.0366667	0.14	4	6.1	8	3	2.1	0	1.7	6.03333	0.07	0.11	0.15	0.05	0.04	0	0.03	0.11	1.62233	0.164031	0.45433
100504703	'A730063M14Rik'	lncRNA	0.14	0.24	0.35	0.16	0.07	0.12	0.116667	0.243333	6	10	12	7	3	5	5	9.33333	0.11	0.19	0.27	0.13	0.05	0.09	0.09	0.19	0.666246	0.391215	0.772745
100504714	'Gm16793'	lncRNA	0.87	0.79	0.91	0.38	0.42	0.39	0.396667	0.856667	37	32	37	17	17	16	16.6667	35.3333	0.71	0.62	0.71	0.31	0.32	0.3	0.31	0.68	0.870424	0.0292058	0.131956
100504717	'Gm12709'	lncRNA
100504720	'2310002F09Rik'	lncRNA
100504728	'Gm13985'	lncRNA
100504733	'A730018C14Rik'	lncRNA
100504740	'Gm20383'	lncRNA	2.61	2.37	5.45	1.34	0.84	0.59	0.923333	3.47667	22	20	44	12	7	5	8	28.6667	2.15	1.87	4.24	1.1	0.64	0.46	0.733333	2.75333	1.61135	0.00715225	0.0441904
100505025	'4930429H19Rik'	lncRNA
100529079	'5830418P13Rik'	lncRNA
100532730	'C230037L18Rik'	lncRNA	2.05	1.83	1.96	0.31	0.75	0.78	0.613333	1.94667	57	40	60	20	30	21	23.6667	52.3333	1.68	1.44	1.53	0.25	0.57	0.6	0.473333	1.55	0.938623	0.0104169	0.0595305
100534279	'Gm21011'	lncRNA
100568458	'Gm38431'	lncRNA	0.07	0.07	0.22	0.2	0.07	0.14	0.136667	0.12	1	1	3	3	1	2	2	1.66667	0.06	0.06	0.17	0.16	0.05	0.11	0.106667	0.0966667	-0.503805	0.722617	0.952328
100579137	'Dmrt1i'	lncRNA
100579147	'Gm10619'	lncRNA
100579151	'Gm16833'	lncRNA
100653389	'Mir155hg'	lncRNA	0	0.13	0.07	0	0	0	0	0.0666667	0	4	2	0	0	0	0	2	0	0.1	0.05	0	0	0	0	0.05	3.2089	0.248517	0.595708
100689703	'9330133O14Rik'	lncRNA	0.3	0.38	0.39	0.61	0.54	0.4	0.516667	0.356667	15	18	18	31	26	19	25.3333	17	0.25	0.3	0.3	0.5	0.41	0.31	0.406667	0.283333	-0.794629	0.075898	0.268499
100740	'AI839979'	lncRNA	0.64	0.17	0.12	0.2	0.53	0.21	0.313333	0.31	32	22	16	30.06	60.59	30	40.2167	23.3333	0.52	0.14	0.09	0.16	0.41	0.16	0.243333	0.25	-0.967018	0.0328959	0.144037
100859962	'Gm21057'	lncRNA	0	0	0.09	0	0	0	0	0.03	0	0	1	0	0	0	0	0.333333	0	0	0.07	0	0	0	0	0.0233333	0.747384	0.854672	0.952328
100861647	'Gm21104'	lncRNA	2.03	3.05	3.84	2.53	1.87	2.34	2.24667	2.97333	26.75	37.08	46.26	34.94	24.24	30.31	29.83	36.6967	1.66	2.41	2.98	2.07	1.43	1.81	1.77	2.35	0.0814245	0.834505	0.952328
100861794	'Gm21221'	lncRNA
100861851	'Gm21269'	lncRNA
100861869	'Gm21283'	lncRNA	0	1.45	0.74	2.56	1.15	0.53	1.41333	0.73	0	2	1	5	2	1	2.66667	1	0	1.14	0.58	2.09	0.88	0.41	1.12667	0.573333	-1.6608	0.296951	0.664199
100861870	'Gm21284'	lncRNA	0.1	0.04	0.06	0	0.02	0.06	0.0266667	0.0666667	6.17	3	4	0	2	3	1.66667	4.39	0.08	0.03	0.04	0	0.02	0.05	0.0233333	0.05	1.18521	0.347122	0.721195
100861913	'C330026H20Rik'	lncRNA	0	0	0	0	0.02	0	0.00666667	0	0	0	0	0	1	0	0.333333	0	0	0	0	0	0.01	0	0.00333333	0	-1.17617	0.773161	0.952328
100862268	'Gm16958'	lncRNA
100873092	'Gm15679'	lncRNA
100873094	'Rubie'	lncRNA	0	0.03	0.26	0.3	0.02	0	0.106667	0.0966667	0	1	1	13	1	0	4.66667	0.666667	0	0.02	0.2	0.24	0.01	0	0.0833333	0.0733333	-3.09044	0.103074	0.332139
100993	'AW549542'	lncRNA	8.69	9.6	6.63	4.63	10.81	7.47	7.63667	8.30667	205	201	147	96	237	189	174	184.333	7.14	7.57	5.15	3.78	8.27	5.78	5.94333	6.62	-0.109044	0.719732	0.952328
100996933	'Lincred1'	lncRNA
101055769	'Gm12596'	lncRNA	0.08	0.09	0	0.08	0	0	0.0266667	0.0566667	1	1	0	1	0	0	0.333333	0.666667	0.07	0.07	0	0.06	0	0	0.02	0.0466667	0.695295	0.81325	0.952328
101055840	'Gm29729'	lncRNA
101056032	'Gm9831'	lncRNA
101056138	'Gm20619'	lncRNA	0.07	0	0	0.06	0.01	0.07	0.0466667	0.0233333	1	0	0	1	1	1	1	0.333333	0.06	0	0	0.05	0.01	0.05	0.0366667	0.02	-1.69594	0.471359	0.842497
101056149	'Gm15908'	lncRNA	0.05	0	0	0	0	0.21	0.07	0.0166667	1	0	0	0	0	4	1.33333	0.333333	0.04	0	0	0	0	0.16	0.0533333	0.0133333	-2.12479	0.475386	0.844764
101056219	'Urml'	lncRNA	51.04	69.72	99.01	154.25	93.1	159.93	135.76	73.2567	1290.66	1532.57	1976.2	3715.14	2300.26	3671.79	3229.06	1599.81	41.93	54.97	76.99	125.89	71.21	123.64	106.913	57.9633	-1.24741	8.46433e-08	2.77098e-06
101056408	'Gm15816'	lncRNA
101202683	'Dreh'	lncRNA	1.87	2.37	2.25	0.59	1.27	1.08	0.98	2.16333	21	25	23	7	14	12	11	23	1.53	1.87	1.75	0.48	0.97	0.83	0.76	1.71667	0.857591	0.0882909	0.298111
101202684	'Uchl1os'	lncRNA
101447999	'Mirc35hg'	lncRNA
101521	'AI314278'	lncRNA	0.18	0	0.4	0	0	0	0	0.193333	1	0	2	0	0	0	0	1	0.15	0	0.31	0	0	0	0	0.153333	2.22237	0.524676	0.88023
101669761	'Gm15694'	lncRNA	0.98	1.75	3	2.98	2.85	0.44	2.09	1.91	2	3	5	7	6	1	4.66667	3.33333	0.81	1.38	2.33	2.43	2.18	0.34	1.65	1.50667	-0.70811	0.508241	0.873838
101694	'Mir9-3hg'	lncRNA
101786	'A730082K24Rik'	lncRNA
102132	'E230013L22Rik'	lncRNA	0.72	0.82	0.4	0.34	0.29	0.25	0.293333	0.646667	33	36	17	16	13	11	13.3333	28.6667	0.59	0.65	0.31	0.28	0.22	0.19	0.23	0.516667	0.891727	0.0795149	0.277236
102631513	'Gm11998'	lncRNA
102631518	'Gm38438'	lncRNA
102631658	'Gm14437'	lncRNA
102631675	'1700040K01Rik'	lncRNA
102631685	'Gm29642'	lncRNA	0.75	1.43	1.08	1.19	1.68	1.36	1.41	1.08667	51	95	76	70	100	77	82.3333	74	0.62	1.12	0.84	0.97	1.29	1.05	1.10333	0.86	-0.366206	0.206582	0.530603
102631697	'Gm14664'	lncRNA
102631731	'Gm29998'	lncRNA	1.41	1.26	1.23	1.78	1.55	1.32	1.55	1.3	30	25	25	39	31	27	32.3333	26.6667	1.16	0.99	0.96	1.45	1.19	1.02	1.22	1.03667	-0.494517	0.198633	0.51654
102631757	'Gm15318'	lncRNA	7.64	5.04	3.85	1.8	2.54	1.82	2.05333	5.51	228	153	110	62	78	56	65.3333	163.667	6.27	3.98	2.99	1.47	1.94	1.4	1.60333	4.41333	1.1261	0.000443309	0.00448153
102631784	'Gm13267'	lncRNA	0.15	0.07	0.14	0.06	0.11	0.09	0.0866667	0.12	7	3	6	3	5	4	4	5.33333	0.13	0.05	0.11	0.05	0.09	0.07	0.07	0.0966667	0.212564	0.81513	0.952328
102631821	'Gm11682'	lncRNA
102631833	'Gm14040'	lncRNA
102631841	'Gm26629'	lncRNA
102631845	'Gm30075'	lncRNA
102631887	'Gm30108'	lncRNA
102631889	'Gm16638'	lncRNA	0.66	0.61	0.56	0.11	0.19	0.38	0.226667	0.61	38	36	31	7	11	21	13	35	0.55	0.48	0.44	0.09	0.14	0.29	0.173333	0.49	1.21864	0.0142503	0.0764066
102631922	'Gm30132'	lncRNA
102631959	'Gm30158'	lncRNA
102631961	'Gm26634'	lncRNA	0	0	0	0.03	0.03	0	0.02	0	0	0	0	1	1	0	0.666667	0	0	0	0	0.02	0.02	0	0.0133333	0	-2.06659	0.589303	0.923935
102631981	'Gm30173'	lncRNA	0	0.32	0.61	1.79	0.88	0.84	1.17	0.31	0	3	10	24	8	11	14.3333	4.33333	0	0.25	0.47	1.46	0.67	0.65	0.926667	0.24	-1.98804	0.0428501	0.176008
102631993	'Gm15756'	lncRNA	0	0.07	0	0.07	0.07	0.07	0.07	0.0233333	0	3	0	3	3	3	3	1	0	0.06	0	0.06	0.05	0.06	0.0566667	0.02	-1.80816	0.263635	0.617234
102632008	'Gm30189'	lncRNA	0.2	0.14	0.26	0.07	0.08	0.08	0.0766667	0.2	6	3.98	5	2.09	2	1	1.69667	4.99333	0.17	0.11	0.2	0.06	0.06	0.06	0.06	0.16	1.277	0.265812	0.619835
102632031	'Gm15728'	lncRNA	0	0.02	0.01	0.02	0.03	0.01	0.02	0.01	0	2	1	2	3	0.55	1.85	1	0	0.02	0.01	0.02	0.03	0	0.0166667	0.01	-0.947933	0.619843	0.93646
102632048	'Gm30223'	lncRNA	0	0	0	0.03	0	0	0.01	0	0	0	0	1	0	0	0.333333	0	0	0	0	0.02	0	0	0.00666667	0	-1.17617	0.773161	0.952328
102632051	'Gm30225'	lncRNA
102632053	'A330032P22Rik'	lncRNA	0.53	0.53	1.01	0.6	0.55	0.47	0.54	0.69	18	16	22	14	12	16	14	18.6667	0.43	0.42	0.79	0.49	0.42	0.36	0.423333	0.546667	0.196008	0.690927	0.952328
102632075	'Gm30244'	lncRNA	0	0	0	0.26	0.87	0	0.376667	0	0	0	0	1	3	0	1.33333	0	0	0	0	0.21	0.66	0	0.29	0	-3.03063	0.321934	0.693443
102632078	'Gm12290'	lncRNA	0	0.02	0	0	0	0	0	0.00666667	0	1	0	0	0	0	0	0.333333	0	0.02	0	0	0	0	0	0.00666667	0.747384	0.854672	0.952328
102632119	'Gm16311'	lncRNA
102632136	'Gm20482'	lncRNA	1.34	1.23	1.14	0.58	0.7	0.65	0.643333	1.23667	91.78	80.53	72.24	40.4	46.58	42.8	43.26	81.5167	1.1	0.97	0.88	0.47	0.54	0.51	0.506667	0.983333	0.715328	0.00949084	0.0554632
102632139	'Gm30292'	lncRNA
102632155	'Gm24105'	lncRNA	0	0.04	0	0	0.04	0.07	0.0366667	0.0133333	0	1	0	0	1	2	1	0.333333	0	0.03	0	0	0.03	0.05	0.0266667	0.01	-1.6811	0.529454	0.882465
102632156	'2610318M16Rik'	lncRNA	0.02	0.04	0.07	0.06	0.05	0.06	0.0566667	0.0433333	0.99	2	3.78	2.04	1.3	2.09	1.81	2.25667	0.01	0.03	0.06	0.04	0.04	0.05	0.0433333	0.0333333	-0.244742	0.876044	0.961541
102632222	'Gm17182'	lncRNA
102632231	'Gm2245'	lncRNA	0.5	0.62	0.55	0.12	0.3	0.17	0.196667	0.556667	12	14	12	3	7	4	4.66667	12.6667	0.41	0.49	0.42	0.1	0.23	0.13	0.153333	0.44	1.23803	0.0807837	0.280484
102632240	'Gm15555'	lncRNA
102632244	'Gm30375'	lncRNA
102632246	'Gm12354'	lncRNA	8.31	8.92	9.77	4.4	6.86	4.63	5.29667	9	69	68	67	36	52	38	42	68	6.82	7.03	7.59	3.59	5.25	3.58	4.14	7.14667	0.487755	0.0854599	0.291779
102632253	'Gm30381'	lncRNA
102632284	'Gm30400'	lncRNA	0	0.03	0	0	0	0	0	0.01	0	2	0	0	0	0	0	0.666667	0	0.03	0	0	0	0	0	0.01	1.63075	0.686389	0.952328
102632302	'Hoxb3os'	lncRNA	0.71	0.93	1.23	0.68	0.89	0.51	0.693333	0.956667	13	19	34	22	19	16	19	22	0.58	0.73	0.95	0.55	0.68	0.39	0.54	0.753333	-0.0151515	0.976188	0.986891
102632331	'Gm30431'	lncRNA	2.16	2.52	2.86	1.13	1.36	1.69	1.39333	2.51333	83	87.24	99.79	46.16	50.73	61.15	52.68	90.01	1.78	1.99	2.22	0.93	1.04	1.31	1.09333	1.99667	0.560964	0.0301363	0.134993
102632360	'Gm14616'	lncRNA
102632391	'Gm30476'	lncRNA	0	0	0	0.1	0	0.15	0.0833333	0	0	0	0	1	0	1	0.666667	0	0	0	0	0.09	0	0.12	0.07	0	-2.11052	0.577327	0.91802
102632393	'Gm30478'	lncRNA
102632400	'Gm26689'	lncRNA
102632423	'Gm30498'	lncRNA
102632430	'Gm30505'	lncRNA	0.4	0	0.97	0.36	1.18	1.11	0.883333	0.456667	1	0	2	1	3	3	2.33333	1	0.33	0	0.75	0.29	0.9	0.86	0.683333	0.36	-1.42612	0.372181	0.749056
102632462	'Gm30529'	lncRNA	0.48	0.45	0.43	0.71	0.54	0.36	0.536667	0.453333	11	9.72	8.99	16.73	12.01	7.98	12.24	9.90333	0.39	0.35	0.33	0.58	0.41	0.28	0.423333	0.356667	-0.537832	0.3985	0.779392
102632463	'Prox1os'	lncRNA	10.98	8.57	5.16	4.99	7.34	6.91	6.41333	8.23667	199	155	97	117	138	128	127.667	150.333	9.02	6.76	4.01	4.07	5.61	5.34	5.00667	6.59667	0.0329664	0.908846	0.975955
102632477	'Gm30539'	lncRNA
102632488	'Gm29508'	lncRNA
102632492	'Gm30551'	lncRNA	0.04	0.04	0.05	0.12	0.08	0.04	0.08	0.0433333	1	1	1.02	3	2	1	2	1.00667	0.03	0.03	0.04	0.1	0.06	0.03	0.0633333	0.0333333	-1.22116	0.42944	0.805931
102632493	'4930554P06Rik'	lncRNA
102632515	'Gm30570'	lncRNA	0.02	0	0	0	0	0	0	0.00666667	1	0	0	0	0	0	0	0.333333	0.02	0	0	0	0	0	0	0.00666667	0.747384	0.854672	0.952328
102632566	'Gm30605'	lncRNA	0.05	0.02	0.02	0	0.02	0.09	0.0366667	0.03	1	1	1	0	1	3	1.33333	1	0.04	0.01	0.02	0	0.01	0.07	0.0266667	0.0233333	-0.62292	0.735113	0.952328
102632621	'Gm30648'	lncRNA	0.22	0.15	0.15	0.13	0.2	0.17	0.166667	0.173333	8	5	5	5	7	6	6	6	0.18	0.11	0.12	0.11	0.15	0.13	0.13	0.136667	-0.203734	0.795537	0.952328
102632645	'Gm30667'	lncRNA
102632654	'Gm16555'	lncRNA	0.04	0	0	0	0	0	0	0.0133333	1	0	0	0	0	0	0	0.333333	0.03	0	0	0	0	0	0	0.01	0.747384	0.854672	0.952328
102632673	'Gm15245'	lncRNA
102632688	'Gm30694'	lncRNA
102632708	'Gm15523'	lncRNA
102632716	'Gm30712'	lncRNA	0.34	0.4	0.49	0.1	0	0	0.0333333	0.41	9	9	12	3	0	0	1	10	0.28	0.31	0.38	0.08	0	0	0.0266667	0.323333	3.0801	0.011438	0.0641277
102632730	'Gm30726'	lncRNA
102632812	'Gm30789'	lncRNA	1.21	0.63	0.82	0.37	0.57	0.9	0.613333	0.886667	152	79	93	41	72	107	73.3333	108	0.99	0.5	0.64	0.3	0.44	0.7	0.48	0.71	0.359299	0.361656	0.737707
102632813	'Gm15486'	lncRNA
102632814	'Gm30790'	lncRNA
102632818	'Gm30794'	lncRNA	0.07	0.22	0.22	0.13	0.21	0.48	0.273333	0.17	1	3	4	2	3	4	3	2.66667	0.06	0.17	0.17	0.11	0.16	0.37	0.213333	0.133333	-0.39121	0.735125	0.952328
102632853	'Gm30818'	lncRNA	0.03	0	0	0	0.03	0.03	0.02	0.01	1	0	0	0	1	1	0.666667	0.333333	0.02	0	0	0	0.02	0.02	0.0133333	0.00666667	-1.08372	0.711053	0.952328
102632854	'Gm17115'	lncRNA	0.54	0.8	0.71	0.73	0.83	1.17	0.91	0.683333	10	14	12	14	15	21	16.6667	12	0.45	0.63	0.55	0.6	0.64	0.9	0.713333	0.543333	-0.691296	0.18991	0.501312
102632880	'Gm30842'	lncRNA	8.49	11.69	10.97	23.71	24.15	22.99	23.6167	10.3833	345	467	460	1101	1056	991	1049.33	424	6.97	9.21	8.53	19.35	18.47	17.77	18.53	8.23667	-1.52746	1.29478e-24	5.47671e-22
102632897	'Gm30853'	lncRNA
102632928	'Gm17215'	lncRNA
102632938	'Gm15939'	lncRNA	0	0	0.04	0.04	0.04	0.06	0.0466667	0.0133333	0	0	2	2	2	3	2.33333	0.666667	0	0	0.03	0.03	0.03	0.05	0.0366667	0.01	-2.04162	0.258948	0.611188
102632940	'Gm11482'	lncRNA
102632943	'Gm30889'	lncRNA
102632990	'A730098A19Rik'	lncRNA
102633000	'2310043M15Rik'	lncRNA	0.24	0.19	0.03	0.08	0.16	0.05	0.0966667	0.153333	9	7	1	3	6	2	3.66667	5.66667	0.19	0.15	0.02	0.06	0.12	0.04	0.0733333	0.12	0.445277	0.674851	0.952328
102633035	'Gm28979'	lncRNA	0	0	0.02	0	0	0	0	0.00666667	0	0	1	0	0	0	0	0.333333	0	0	0.01	0	0	0	0	0.00333333	0.747384	0.854672	0.952328
102633042	'Gm30963'	lncRNA	0	0.1	0.02	0.04	0.16	0.1	0.1	0.04	0	2	1	2	4	1	2.33333	1	0	0.08	0.02	0.03	0.13	0.08	0.08	0.0333333	-1.42888	0.376439	0.75434
102633065	'Gm13470'	lncRNA	0	0	0	0	0	0.18	0.06	0	0	0	0	0	0	1	0.333333	0	0	0	0	0	0	0.14	0.0466667	0	-1.17617	0.773161	0.952328
102633071	'Gm14167'	lncRNA	0.25	0.18	0.63	0.39	0.57	0.37	0.443333	0.353333	8	9	16	21	29	19	23	11	0.21	0.14	0.49	0.32	0.43	0.29	0.346667	0.28	-1.27654	0.0135838	0.0735584
102633081	'Gm12610'	lncRNA	0	0.08	0	0.25	0.57	0.06	0.293333	0.0266667	0	1	0	3	5	1	3	0.333333	0	0.06	0	0.2	0.44	0.05	0.23	0.02	-3.26261	0.0787228	0.275409
102633151	'M5C1000I18Rik'	lncRNA
102633152	'Gm28703'	lncRNA	2.15	2.1	2.4	2.13	1.96	2.21	2.1	2.21667	619.17	580.58	645.9	625.67	546.46	608.03	593.387	615.217	1.76	1.66	1.86	1.74	1.5	1.71	1.65	1.76	-0.166965	0.242714	0.586492
102633169	'Gm31064'	lncRNA	0.02	0	0.03	0.06	0.03	0.1	0.0633333	0.0166667	2.15	0	3.01	6.15	2.55	10.15	6.28333	1.72	0.02	0	0.02	0.05	0.02	0.08	0.05	0.0133333	-2.08274	0.09073	0.303857
102633181	'Gm31072'	lncRNA
102633199	'Gm31087'	lncRNA
102633214	'Gm12925'	lncRNA	0.05	0.28	0.28	0.24	0.19	0.33	0.253333	0.203333	2	10	10	4	5	10	6.33333	7.33333	0.04	0.22	0.22	0.2	0.15	0.26	0.203333	0.16	-0.0173504	0.984087	0.990555
102633236	'Gm13481'	lncRNA	0	0.02	0	0	0	0	0	0.00666667	0	1	0	0	0	0	0	0.333333	0	0.02	0	0	0	0	0	0.00666667	0.747384	0.854672	0.952328
102633244	'Gm26710'	lncRNA	0.11	0.59	0.05	0.02	0.53	0.41	0.32	0.25	5	4	2	1	6	7	4.66667	3.66667	0.09	0.46	0.04	0.02	0.41	0.32	0.25	0.196667	-0.537392	0.608267	0.928595
102633245	'Gm15723'	lncRNA
102633266	'Gm9748'	lncRNA
102633275	'Gm31138'	lncRNA	0.05	0.04	0.16	0.62	0.17	0.62	0.47	0.0833333	2.14	1.44	6.09	13.13	2	11.19	8.77333	3.22333	0.04	0.03	0.12	0.51	0.13	0.48	0.373333	0.0633333	-1.78494	0.0898914	0.301995
102633311	'Gm31108'	lncRNA	0	0	0.02	0.6	0.58	1.09	0.756667	0.00666667	0	0	1	1.14	0.99	2.01	1.38	0.333333	0	0	0.02	0.49	0.45	0.84	0.593333	0.00666667	-1.72324	0.517341	0.877628
102633312	'1700001J04Rik'	lncRNA
102633315	'Gm16159'	lncRNA	0.05	0	0	0	0	0	0	0.0166667	1	0	0	0	0	0	0	0.333333	0.04	0	0	0	0	0	0	0.0133333	0.747384	0.854672	0.952328
102633345	'Gm9922'	lncRNA	0.21	0.37	0.31	0.18	0.35	0.13	0.22	0.296667	8	15	16	5	11	7	7.66667	13	0.17	0.29	0.24	0.15	0.27	0.1	0.173333	0.233333	0.553374	0.398558	0.779392
102633347	'Gm26708'	lncRNA
102633388	'Gm31223'	lncRNA	0.1	0.4	0.05	0.16	0.2	0.07	0.143333	0.183333	3	12	2	4	6	2	4	5.66667	0.08	0.32	0.04	0.13	0.15	0.06	0.113333	0.146667	0.295602	0.777332	0.952328
102633423	'Gm31254'	lncRNA
102633436	'Gm11217'	lncRNA
102633437	'Chrna1os'	lncRNA	2.94	2.11	2.82	1.5	2	1.77	1.75667	2.62333	49	36	45	25	33	31	29.6667	43.3333	2.42	1.66	2.19	1.22	1.53	1.37	1.37333	2.09	0.338253	0.327858	0.700228
102633438	'Gm13974'	lncRNA
102633464	'Gm31282'	lncRNA	0	0.03	0.02	0	0.16	0.09	0.0833333	0.0166667	0	1	1	0	4	4	2.66667	0.666667	0	0.03	0.02	0	0.12	0.07	0.0633333	0.0166667	-2.1986	0.238483	0.580162
102633478	'Gm16090'	lncRNA	0.05	0.07	0.05	0.05	0	0.07	0.04	0.0566667	2	3	2	2	0	3	1.66667	2.33333	0.04	0.06	0.04	0.04	0	0.06	0.0333333	0.0466667	0.245179	0.865324	0.957391
102633504	'Gm31314'	lncRNA
102633526	'Gm31333'	lncRNA	2.98	3.71	2.85	1.89	3.59	4.54	3.34	3.18	131.87	157.09	119.14	89.45	150.66	184.18	141.43	136.033	2.45	2.92	2.22	1.54	2.75	3.51	2.6	2.53	-0.262579	0.348021	0.721716
102633540	'Myhas'	lncRNA
102633575	'Gm31367'	lncRNA	0	0	0.02	0	0.01	0.12	0.0433333	0.00666667	0	0	1	0	1	2	1	0.333333	0	0	0.01	0	0.01	0.09	0.0333333	0.00333333	-1.6811	0.529828	0.882465
102633578	'Gm31369'	lncRNA
102633673	'Etaa1os'	lncRNA	0.43	0.76	0.44	0.3	0.23	0.41	0.313333	0.543333	7	12	6	5	4	8	5.66667	8.33333	0.35	0.6	0.34	0.25	0.18	0.31	0.246667	0.43	0.335805	0.664392	0.952328
102633682	'Gm31447'	lncRNA
102633704	'Gm31465'	lncRNA
102633753	'4930534H03Rik'	lncRNA	0.02	0.05	0.13	0.05	0.1	0.13	0.0933333	0.0666667	1	2	5	2	4	5	3.66667	2.66667	0.02	0.04	0.1	0.04	0.08	0.1	0.0733333	0.0533333	-0.67845	0.551765	0.900448
102633754	'Gm31504'	lncRNA	0	0.43	0	0	1.09	0	0.363333	0.143333	0	1	0	0	3	0	1	0.333333	0	0.34	0	0	0.83	0	0.276667	0.113333	-1.61927	0.613942	0.932318
102633758	'Gm31508'	lncRNA	8.3	12.94	12.68	26.52	30.75	38.33	31.8667	11.3067	516.85	772.18	836.98	1909.69	2219.46	2786.83	2305.33	708.67	6.82	10.2	9.86	21.64	23.52	29.63	24.93	8.96	-1.92309	8.64575e-22	2.53178e-19
102633760	'Gm31510'	lncRNA
102633773	'Gm31520'	lncRNA
102633805	'Gm26688'	lncRNA
102633851	'Gm31579'	lncRNA
102633856	'Gm31583'	lncRNA	27.93	17.81	10.57	4.87	6.11	5.43	5.47	18.77	1945	1194	714	303	402	391	365.333	1284.33	22.94	14.04	8.22	3.97	4.67	4.2	4.28	15.0667	1.6191	2.71864e-07	7.73174e-06
102633867	'Gm31592'	lncRNA	0	0.08	0	0.04	0.04	0.27	0.116667	0.0266667	0	2	0	1	1	6.71	2.90333	0.666667	0	0.06	0	0.03	0.03	0.21	0.09	0.02	-2.23094	0.242111	0.585354
102633880	'A730081D07Rik'	lncRNA	0.32	0.26	0.32	0.27	0.15	0.23	0.216667	0.3	15	11	14	12	7	10.84	9.94667	13.3333	0.27	0.21	0.25	0.22	0.12	0.18	0.173333	0.243333	0.242234	0.683804	0.952328
102633901	'Gm31616'	lncRNA	0	0	0.09	0	0	0	0	0.03	0	0	1	0	0	0	0	0.333333	0	0	0.07	0	0	0	0	0.0233333	0.747384	0.854672	0.952328
102633911	'Gm12022'	lncRNA
102633941	'Gm31641'	lncRNA	0.02	0.03	0.04	0.07	0.05	0	0.04	0.03	1	1.54	2	4.33	3	0	2.44333	1.51333	0.01	0.02	0.03	0.06	0.04	0	0.0333333	0.02	-1.03057	0.510912	0.876281
102633975	'Gm12911'	lncRNA
102633986	'Gm31679'	lncRNA	1.95	1.81	1.8	1.54	1.98	1.99	1.83667	1.85333	180.34	160.42	154.94	145.13	177.53	175.71	166.123	165.233	1.6	1.43	1.4	1.25	1.52	1.54	1.43667	1.47667	-0.218187	0.239714	0.581882
102634000	'Gm31690'	lncRNA
102634016	'Gm31704'	lncRNA	0	0	0	0	0	0.04	0.0133333	0	0	0	0	0	0	1	0.333333	0	0	0	0	0	0	0.03	0.01	0	-1.17617	0.773161	0.952328
102634021	'Gm13001'	lncRNA
102634049	'Gm31728'	lncRNA	0.53	0.77	0.6	0.33	0.53	0.69	0.516667	0.633333	3	4	3	2	3	4	3	3.33333	0.43	0.61	0.46	0.27	0.4	0.53	0.4	0.5	-0.0597155	0.955053	0.975955
102634055	'Gm31734'	lncRNA	0.23	0.09	0.09	0.26	0.13	0.13	0.173333	0.136667	5	2	2	3	2	2	2.33333	3	0.19	0.07	0.07	0.22	0.1	0.1	0.14	0.11	0.152884	0.897217	0.971919
102634061	'Gm31739'	lncRNA
102634075	'Gm31747'	lncRNA
102634084	'Gm31752'	lncRNA
102634093	'Gm31759'	lncRNA
102634101	'Gm31763'	lncRNA	0.05	0.05	0.03	0.24	0.15	0.24	0.21	0.0433333	2	2.14	1	6	6	5	5.66667	1.71333	0.04	0.04	0.02	0.2	0.11	0.18	0.163333	0.0333333	-1.97696	0.0638728	0.236696
102634125	'Gm31786'	lncRNA	0	0	0	0	0	0.01	0.00333333	0	0	0	0	0	0	1	0.333333	0	0	0	0	0	0	0.01	0.00333333	0	-1.17617	0.773161	0.952328
102634128	'4930598N05Rik'	lncRNA
102634155	'Gm17025'	lncRNA	0.9	0.22	0.29	0.1	0.32	0.22	0.213333	0.47	17	3	5	1	4	4	3	8.33333	0.74	0.17	0.22	0.08	0.24	0.17	0.163333	0.376667	1.29577	0.216338	0.54766
102634174	'Gm16104'	lncRNA	0.14	0	0	0	0	0	0	0.0466667	1	0	0	0	0	0	0	0.333333	0.11	0	0	0	0	0	0	0.0366667	0.747384	0.854672	0.952328
102634194	'Gm29461'	lncRNA
102634268	'Kbtbd8os'	lncRNA	0	0	0	0.12	0	0	0.04	0	0	0	0	1	0	0	0.333333	0	0	0	0	0.1	0	0	0.0333333	0	-1.17617	0.773161	0.952328
102634280	'Gm48908'	lncRNA	0.59	0.55	0.4	0.63	0.26	0.21	0.366667	0.513333	28	17	13	27	20	16	21	19.3333	0.48	0.44	0.31	0.51	0.2	0.16	0.29	0.41	-0.330695	0.518716	0.877826
102634282	'Gm31904'	lncRNA
102634287	'Gm31908'	lncRNA
102634302	'Gm27199'	lncRNA
102634325	'Gm31933'	lncRNA
102634330	'Gm31938'	lncRNA	0.03	0	0	0	0	0	0	0.01	1	0	0	0	0	0	0	0.333333	0.03	0	0	0	0	0	0	0.01	0.747384	0.854672	0.952328
102634356	'Gm31957'	lncRNA	0.03	0.05	0	0	0.13	0.18	0.103333	0.0266667	1	1	0	0	3	4	2.33333	0.666667	0.02	0.04	0	0	0.1	0.14	0.08	0.02	-1.98992	0.296955	0.664199
102634401	'Gm14424'	lncRNA
102634405	'Gm13133'	lncRNA
102634431	'Gm32014'	lncRNA	0.08	0.06	0.18	0.13	0.07	0.26	0.153333	0.106667	10.9	8.1	23.44	19.06	10	34.92	21.3267	14.1467	0.06	0.05	0.14	0.11	0.06	0.2	0.123333	0.0833333	-0.856847	0.189177	0.500069
102634450	'Gm32031'	lncRNA	2.23	1.48	2.27	1.04	0.81	1.72	1.19	1.99333	20	16	18	11	5	17	11	18	1.83	1.17	1.76	0.85	0.62	1.33	0.933333	1.58667	0.484892	0.418805	0.795757
102634473	'Gm29669'	lncRNA	0.37	0.18	0.06	0	0	0.1	0.0333333	0.203333	7	3	1	0	0	2	0.666667	3.66667	0.31	0.14	0.05	0	0	0.08	0.0266667	0.166667	2.25833	0.202591	0.523326
102634533	'Gm14966'	lncRNA	0.83	0.59	0.68	0.57	0.62	0.34	0.51	0.7	30	26	29	27	21	15	21	28.3333	0.68	0.47	0.53	0.47	0.47	0.26	0.4	0.56	0.214708	0.614905	0.932877
102634559	'Gm29443'	lncRNA	0.02	0.01	0.04	0	0.01	0	0.00333333	0.0233333	5	2	7.01	0	3	0	1	4.67	0.02	0.01	0.03	0	0.01	0	0.00333333	0.02	2.05304	0.181958	0.487516
102634564	'Gm32113'	lncRNA
102634576	'Gm32123'	lncRNA
102634580	'Gm26519'	lncRNA
102634600	'Gm32141'	lncRNA
102634628	'Gm11418'	lncRNA
102634630	'Gm32168'	lncRNA	9.41	10.36	10.72	8.5	8.21	7.85	8.18667	10.1633	597.1	623.17	622.69	554.9	501.36	463.57	506.61	614.32	7.73	8.17	8.33	6.94	6.28	6.07	6.43	8.07667	0.061482	0.657482	0.952328
102634634	'Gm20491'	lncRNA	0.28	0.18	0.27	0.03	0.07	0.15	0.0833333	0.243333	8	5	7	1	2	4	2.33333	6.66667	0.23	0.15	0.21	0.03	0.06	0.11	0.0666667	0.196667	1.30624	0.190786	0.502925
102634635	'Gm32172'	lncRNA	0	0	0.1	0	0	0	0	0.0333333	0	0	1	0	0	0	0	0.333333	0	0	0.08	0	0	0	0	0.0266667	0.747384	0.854672	0.952328
102634658	'Gm27198'	lncRNA
102634661	'Gm28178'	lncRNA	0	0	0.01	0	0	0	0	0.00333333	0	0	1	0	0	0	0	0.333333	0	0	0.01	0	0	0	0	0.00333333	0.747384	0.854672	0.952328
102634668	'Gm32200'	lncRNA	0.17	0.18	0.07	0.13	0.42	0.27	0.273333	0.14	3	5	2	4	7	8	6.33333	3.33333	0.14	0.14	0.05	0.11	0.32	0.21	0.213333	0.11	-1.13306	0.214604	0.544799
102634670	'Gm32202'	lncRNA	4.22	2.34	5.94	0.97	1.43	0.96	1.12	4.16667	59	28	66	13	20	13	15.3333	51	3.47	1.84	4.62	0.79	1.09	0.74	0.873333	3.31	1.52914	0.00106667	0.00934409
102634677	'Gm32209'	lncRNA
102634678	'Haglr'	lncRNA
102634680	'Gm14210'	lncRNA	0.3	0.33	0.54	0.34	0.3	0.28	0.306667	0.39	37	39	62	43	36	33	37.3333	46	0.25	0.26	0.42	0.28	0.23	0.22	0.243333	0.31	0.078314	0.825325	0.952328
102634710	'Gm32229'	lncRNA	0	0	0.02	0	0	0.02	0.00666667	0.00666667	0	0	1	0	0	1	0.333333	0.333333	0	0	0.02	0	0	0.02	0.00666667	0.00666667	-0.214388	0.95686	0.975955
102634726	'Gm29012'	lncRNA	1.06	0.48	0.91	0.14	0.54	0.61	0.43	0.816667	14	6	11	2	7	8	5.66667	10.3333	0.87	0.38	0.71	0.12	0.41	0.47	0.333333	0.653333	0.670837	0.395326	0.776538
102634737	'Gm32249'	lncRNA	0.14	0.17	0.22	0.06	0.32	0.19	0.19	0.176667	8	7	6	4	10	4	6	7	0.12	0.13	0.17	0.05	0.24	0.14	0.143333	0.14	0.0295533	0.970229	0.983553
102634753	'Gm12440'	lncRNA
102634755	'Gm32261'	lncRNA	0.08	0.12	0.17	0.2	0.15	0.08	0.143333	0.123333	3	4	6	6.19	6	3	5.06333	4.33333	0.06	0.1	0.13	0.17	0.11	0.06	0.113333	0.0966667	-0.42495	0.638123	0.947866
102634769	'Gm32273'	lncRNA	1.06	0.86	0.45	0.96	0.37	0.42	0.583333	0.79	13	14	4	8	6	10	8	10.3333	0.87	0.68	0.35	0.78	0.28	0.32	0.46	0.633333	0.155883	0.831771	0.952328
102634777	'Gm13266'	lncRNA
102634790	'Gm32291'	lncRNA
102634837	'Gm13853'	lncRNA
102634887	'Gm13112'	lncRNA
102634900	'Gm16685'	lncRNA	0.19	0.38	0.31	0.19	0.32	0.62	0.376667	0.293333	7.94	15.94	12.21	8	12.62	23.99	14.87	12.03	0.16	0.3	0.24	0.15	0.24	0.48	0.29	0.233333	-0.557907	0.381996	0.761363
102634913	'Gm16070'	lncRNA	0	0	0	0	0.01	0	0.00333333	0	0	0	0	0	1	0	0.333333	0	0	0	0	0	0.01	0	0.00333333	0	-1.17617	0.773161	0.952328
102634922	'Gm32391'	lncRNA	3.02	1.7	1.67	1.06	1.56	1.71	1.44333	2.13	181	132	113	89	110	106	101.667	142	2.48	1.34	1.3	0.87	1.19	1.32	1.12667	1.70667	0.277541	0.277572	0.637046
102634962	'Gm27252'	lncRNA	3.44	4.12	4.33	18.75	10.19	16.74	15.2267	3.96333	151	161	132	783	392	602	592.333	148	2.83	3.25	3.36	15.3	7.8	12.94	12.0133	3.14667	-2.23242	7.33186e-16	1.01233e-13
102634968	'Gm3521'	lncRNA
102634992	'Gm32441'	lncRNA
102635012	'Gm32455'	lncRNA
102635013	'Gm15825'	lncRNA
102635020	'Gm32461'	lncRNA	55.78	38.4	37.08	10.42	20.58	14.03	15.01	43.7533	171	108	106	32	65	38	45	128.333	45.82	30.27	28.83	8.51	15.74	10.85	11.7	34.9733	1.32067	0.000112935	0.00141181
102635028	'Gm32468'	lncRNA	3.68	1.97	1.41	2.37	1.73	1.6	1.9	2.35333	118	66	51	81.8	49	69	66.6	78.3333	3.02	1.55	1.09	1.94	1.32	1.23	1.49667	1.88667	0.0252097	0.949161	0.975955
102635069	'Gm32498'	lncRNA	0.16	0.16	0.05	0.27	0.15	0.36	0.26	0.123333	5.44	5.77	2.27	10.85	4.94	12.5	9.43	4.49333	0.13	0.12	0.04	0.22	0.11	0.28	0.203333	0.0966667	-1.34162	0.121378	0.372577
102635083	'Gm26685'	lncRNA	0	0	0.02	0	0	0	0	0.00666667	0	0	1	0	0	0	0	0.333333	0	0	0.02	0	0	0	0	0.00666667	0.747384	0.854672	0.952328
102635087	'Gm32511'	lncRNA	2.9	1	0.53	0.33	1.01	0.7	0.68	1.47667	108	50	32	22	43	24	29.6667	63.3333	2.38	0.79	0.41	0.27	0.77	0.54	0.526667	1.19333	0.913357	0.0719074	0.258465
102635149	'Gm32561'	lncRNA
102635191	'Gm16573'	lncRNA	27.66	32.36	31.89	22.48	25.76	23.84	24.0267	30.6367	448	477	460	386	350	347	361	461.667	22.72	25.52	24.8	18.35	19.71	18.43	18.83	24.3467	0.137369	0.329236	0.701764
102635192	'Gm16835'	lncRNA	0.01	0	0.03	0.02	0.02	0.02	0.02	0.0133333	1	0	1	1	1	1	1	0.666667	0.01	0	0.02	0.02	0.02	0.02	0.02	0.01	-0.79582	0.696555	0.952328
102635200	'Gm16279'	lncRNA	0.27	0.35	0.3	0.14	0.36	0.41	0.303333	0.306667	20.95	26	21.13	11.29	27	29.83	22.7067	22.6933	0.22	0.28	0.23	0.12	0.28	0.31	0.236667	0.243333	-0.203778	0.673513	0.952328
102635226	'Gm32618'	lncRNA	22.97	22.6	25.04	17.42	20.57	18.99	18.9933	23.5367	820.93	786.08	822.87	635.66	727.98	655.49	673.043	809.96	18.87	17.82	19.47	14.22	15.74	14.68	14.88	18.72	0.0558508	0.605582	0.926589
102635233	'Gm32624'	lncRNA	1.21	0.95	0.68	0.37	0.47	0.52	0.453333	0.946667	31	17	16	9	12	10	10.3333	21.3333	1	0.75	0.53	0.3	0.36	0.4	0.353333	0.76	0.84516	0.128255	0.386971
102635243	'Gm32633'	lncRNA	0.4	0.36	1.28	0.43	0.41	0.29	0.376667	0.68	17.94	17.98	20.77	20.59	22.08	14.44	19.0367	18.8967	0.33	0.29	1	0.35	0.31	0.23	0.296667	0.54	-0.26529	0.567929	0.913734
102635247	'Gm32635'	lncRNA
102635290	'Ttc39aos1'	lncRNA	4.83	6.25	9.44	0.49	0.34	0.38	0.403333	6.84	188	189	292	16	17	16	16.3333	223	3.97	4.93	7.34	0.4	0.26	0.29	0.316667	5.41333	3.55311	8.99021e-29	5.8432e-26
102635321	'Gm32693'	lncRNA
102635381	'Gm32738'	lncRNA	1.06	1.84	1.39	1.54	1.36	1.58	1.49333	1.43	37	61	45	55	46	53	51.3333	47.6667	0.87	1.45	1.08	1.26	1.04	1.22	1.17333	1.13333	-0.328717	0.305638	0.675399
102635403	'Gm32754'	lncRNA
102635415	'Halr1'	lncRNA	0	0	0	0	0	0.01	0.00333333	0	0	0	0	0	0	0.92	0.306667	0	0	0	0	0	0	0	0	0
102635484	'Gm32810'	lncRNA	0.61	0.64	0.74	0.61	0.54	0.71	0.62	0.663333	22.31	22.34	25.39	22.91	19.46	25.05	22.4733	23.3467	0.5	0.5	0.58	0.49	0.42	0.55	0.486667	0.526667	-0.154648	0.711526	0.952328
102635491	'Gm32815'	lncRNA
102635495	'Gm32817'	lncRNA	0.27	0.2	0.24	0.28	0.05	0.37	0.233333	0.236667	12.94	11.19	17.11	9.92	7.9	15.07	10.9633	13.7467	0.23	0.16	0.19	0.23	0.04	0.29	0.186667	0.193333	0.144362	0.812657	0.952328
102635502	'Gm17396'	lncRNA	0.2	0.18	0.05	0.07	0.08	0.08	0.0766667	0.143333	8	7	2	3	3	3	3	5.66667	0.16	0.14	0.04	0.06	0.06	0.06	0.06	0.113333	0.712961	0.475461	0.844841
102635534	'Gm29154'	lncRNA
102635544	'Gm26698'	lncRNA	0.82	0.81	0.73	0.46	1.03	0.84	0.776667	0.786667	17	16	14	10	21	17	16	15.6667	0.67	0.64	0.57	0.38	0.79	0.65	0.606667	0.626667	-0.231269	0.652865	0.952328
102635561	'Ggnbp2os'	lncRNA	2.33	3.36	2.93	2.39	2.77	3.47	2.87667	2.87333	44	56	53	51	53	64	56	51	1.91	2.65	2.28	1.95	2.12	2.68	2.25	2.28	-0.352081	0.219246	0.552635
102635567	'Gm32865'	lncRNA
102635575	'Gm11264'	lncRNA
102635581	'Gm32875'	lncRNA
102635594	'Gm32885'	lncRNA	0.24	0.32	0.13	0.29	0.23	0.1	0.206667	0.23	2.45	3	1.18	3.15	2.29	1	2.14667	2.21	0.2	0.25	0.1	0.24	0.18	0.08	0.166667	0.183333	-0.21829	0.871543	0.959945
102635610	'Gm32900'	lncRNA
102635633	'Gm32921'	lncRNA	0	0	0.07	0.06	0	0	0.02	0.0233333	0	0	1	1	0	0	0.333333	0.333333	0	0	0.05	0.05	0	0	0.0166667	0.0166667	-0.214388	0.95654	0.975955
102635639	'Gm32926'	lncRNA
102635644	'Gm32931'	lncRNA
102635671	'Gm32950'	lncRNA
102635685	'Gm32960'	lncRNA
102635775	'Gm33027'	lncRNA	3.61	3.85	3.28	3.33	3.07	2.26	2.88667	3.58	217.52	222.25	196.06	188.08	175.86	133.34	165.76	211.943	2.97	3.03	2.55	2.72	2.35	1.75	2.27333	2.85	0.141841	0.483621	0.85297
102635783	'Gm11266'	lncRNA	4.3	4.89	2.51	0.92	3	1.44	1.78667	3.9	226	237	143	53	141	90	94.6667	202	3.53	3.86	1.95	0.75	2.29	1.11	1.38333	3.11333	0.905036	0.00734052	0.0451443
102635797	'Gm33045'	lncRNA	0.22	0.04	0.04	0.05	0.12	0.15	0.106667	0.1	8.83	1.47	1.35	3.02	4.28	5.9	4.4	3.88333	0.18	0.03	0.03	0.04	0.09	0.11	0.08	0.08	-0.449452	0.701455	0.952328
102635808	'Gm33054'	lncRNA	0	0	0	0	0	0.19	0.0633333	0	0	0	0	0	0	1	0.333333	0	0	0	0	0	0	0.15	0.05	0	-1.17617	0.773161	0.952328
102635827	'Gm33070'	lncRNA
102635847	'Gm33086'	lncRNA
102635874	'Gm33100'	lncRNA	0	0	0.01	0.03	0	0	0.01	0.00333333	0	0	1	1	0	0	0.333333	0.333333	0	0	0.01	0.02	0	0	0.00666667	0.00333333	-0.214388	0.95654	0.975955
102635880	'Gm33104'	lncRNA	0	0.04	0.02	0.04	0.07	0.04	0.05	0.02	0	2.23	1.14	2.5	3.97	2	2.82333	1.12333	0	0.03	0.02	0.04	0.05	0.03	0.04	0.0166667	-1.43948	0.356943	0.732073
102635912	'C030005K06Rik'	lncRNA	3.04	2.83	2.79	2.27	2.67	2.38	2.44	2.88667	388.17	348.14	330.84	295.31	329.32	290.95	305.193	355.717	2.49	2.24	2.17	1.85	2.05	1.84	1.91333	2.3	0.0117173	0.938129	0.975955
102635935	'Gm12320'	lncRNA	0	0.04	0	0.07	0.08	0	0.05	0.0133333	0	1	0	2	2	0	1.33333	0.333333	0	0.03	0	0.06	0.06	0	0.04	0.01	-2.10499	0.395189	0.776538
102635937	'Gm12348'	lncRNA	0	0.11	0	0	0	0.05	0.0166667	0.0366667	0	2	0	0	0	1	0.333333	0.666667	0	0.09	0	0	0	0.04	0.0133333	0.03	0.669614	0.848938	0.952328
102635946	'Gm33155'	lncRNA
102635951	'Gm27204'	lncRNA
102635958	'Gm20389'	lncRNA
102635966	'Gm33167'	lncRNA	0.29	0.25	0.16	0.3	0.28	0.24	0.273333	0.233333	54.08	44.41	29.03	58.1	50.69	43.17	50.6533	42.5067	0.23	0.19	0.13	0.25	0.21	0.18	0.213333	0.183333	-0.461008	0.197327	0.514417
102635975	'Gm33174'	lncRNA	0	0	0	0.65	0	0	0.216667	0	0	0	0	3	0	0	1	0	0	0	0	0.53	0	0	0.176667	0	-2.72352	0.494947	0.863698
102636022	'Gm13572'	lncRNA
102636083	'Mannr'	lncRNA
102636087	'Gm13609'	lncRNA	0.08	0	0	0.08	0	0	0.0266667	0.0266667	1	0	0	1	0	0	0.333333	0.333333	0.07	0	0	0.06	0	0	0.02	0.0233333	-0.214388	0.956135	0.975955
102636126	'Gm27211'	lncRNA
102636140	'Gm28867'	lncRNA
102636151	'Gm33301'	lncRNA
102636154	'Gm16124'	lncRNA	5.11	4.38	3.99	2.68	3.71	4.33	3.57333	4.49333	61	49	38	41	48	56	48.3333	49.3333	4.2	3.46	3.1	2.19	2.84	3.35	2.79333	3.58667	-0.17836	0.588556	0.923935
102636155	'Gm33302'	lncRNA
102636178	'Gm33318'	lncRNA	2.1	2.14	2.04	1.2	1.44	0.34	0.993333	2.09333	48	47	35	27	33	8	22.6667	43.3333	1.72	1.68	1.59	0.98	1.1	0.26	0.78	1.66333	0.73261	0.140096	0.41034
102636183	'Parvaos'	lncRNA	0	0	0.03	0	0.03	0	0.01	0.01	0	0	1	0	1	0	0.333333	0.333333	0	0	0.02	0	0.02	0	0.00666667	0.00666667	-0.214388	0.957442	0.975955
102636202	'Gm33337'	lncRNA	0	0	0	0	0.21	0	0.07	0	0	0	0	0	1	0	0.333333	0	0	0	0	0	0.16	0	0.0533333	0	-1.17617	0.773161	0.952328
102636207	'Gm33340'	lncRNA	5.45	3.91	4.02	22.49	11.52	10.68	14.8967	4.46	10	6	6	48	22	22	30.6667	7.33333	4.47	3.08	3.13	18.35	8.81	8.25	11.8033	3.56	-2.29168	0.000126964	0.00156202
102636215	'Gm33347'	lncRNA
102636226	'Gm33354'	lncRNA
102636251	'Gm33370'	lncRNA	0.44	0.24	0.56	0.15	0.15	0.22	0.173333	0.413333	4	4	7	4	2	1	2.33333	5	0.36	0.19	0.44	0.12	0.11	0.17	0.133333	0.33	0.869879	0.417798	0.795455
102636262	'Gm20544'	lncRNA	2.27	2.4	2.07	0.99	1.53	1.47	1.33	2.24667	119	126	109	66	71	77	71.3333	118	1.86	1.89	1.61	0.81	1.17	1.14	1.04	1.78667	0.512895	0.0223032	0.107553
102636368	'Gm33454'	lncRNA	0	0.02	0.02	0.04	0	0	0.0133333	0.0133333	0	1	1	1.81	0	0	0.603333	0.666667	0	0.02	0.02	0.03	0	0	0.01	0.0133333	0.662622	0.822573	0.952328
102636445	'Gm33508'	lncRNA
102636474	'Gm33531'	lncRNA	0.06	0	0	0.02	0	0	0.00666667	0.02	1	0	0	1	0	0	0.333333	0.333333	0.05	0	0	0.02	0	0	0.00666667	0.0166667	-0.214388	0.956135	0.975955
102636491	'Gm33543'	lncRNA	6.33	4.3	6.37	8.78	5.55	11.07	8.46667	5.66667	256	149	211	395	203	415	337.667	205.333	5.2	3.39	4.96	7.16	4.25	8.56	6.65667	4.51667	-0.94441	0.00335609	0.0240412
102636514	'Hand2os1'	lncRNA	10.82	14.65	24.41	10.06	11.17	8.69	9.97333	16.6267	345	392	524	319	333	280	310.667	420.333	8.88	11.55	18.98	8.21	8.54	6.72	7.82333	13.1367	0.217608	0.234107	0.574436
102636590	'AV205837'	lncRNA	0	0	0.02	0	0	0	0	0.00666667	0	0	1	0	0	0	0	0.333333	0	0	0.01	0	0	0	0	0.00333333	0.747384	0.854672	0.952328
102636600	'Gm33619'	lncRNA
102636620	'Gm15326'	lncRNA	0.05	0	0	0	0.03	0	0.01	0.0166667	2	0	0	0	1	0	0.333333	0.666667	0.04	0	0	0	0.02	0	0.00666667	0.0133333	0.723563	0.837104	0.952328
102636662	'Gm33667'	lncRNA
102636673	'Gm13029'	lncRNA
102636674	'Gm33677'	lncRNA
102636681	'Gm11342'	lncRNA	0.55	0.29	0.23	0.9	0.35	0.7	0.65	0.356667	10	6	3	17	5	13	11.6667	6.33333	0.45	0.23	0.18	0.73	0.27	0.54	0.513333	0.286667	-1.10803	0.161939	0.450783
102636691	'Gm29243'	lncRNA
102636737	'Gm33727'	lncRNA
102636764	'Gm29536'	lncRNA
102636777	'Gm12665'	lncRNA
102636890	'Gm12374'	lncRNA
102636903	'Gm17039'	lncRNA	0	0	0	0.08	0.09	0	0.0566667	0	0	0	0	1	1	0	0.666667	0	0	0	0	0.07	0.07	0	0.0466667	0	-2.06659	0.589303	0.923935
102636919	'Gm15199'	lncRNA	0	0	0	0.22	0	0	0.0733333	0	0	0	0	2	0	0	0.666667	0	0	0	0	0.18	0	0	0.06	0	-2.13576	0.596345	0.923935
102636968	'Gm12381'	lncRNA
102636980	'Gm29538'	lncRNA	0	0	0	0.1	0	0	0.0333333	0	0	0	0	1	0	0	0.333333	0	0	0	0	0.08	0	0	0.0266667	0	-1.17617	0.773161	0.952328
102636988	'Gm11728'	lncRNA
102637001	'4930529I22Rik'	lncRNA
102637022	'Gm33934'	lncRNA	1.67	2.4	3.16	1.11	1.76	1.61	1.49333	2.41	116	159	204	79	118	107	101.333	159.667	1.37	1.89	2.46	0.91	1.34	1.24	1.16333	1.90667	0.44205	0.0846671	0.289927
102637039	'Gm33948'	lncRNA
102637104	'Gm34000'	lncRNA
102637142	'Gm12326'	lncRNA
102637176	'Gm20052'	lncRNA
102637191	'Gm34068'	lncRNA
102637193	'Gm13348'	lncRNA	0	0	0.03	0	0	0	0	0.01	0	0	1	0	0	0	0	0.333333	0	0	0.02	0	0	0	0	0.00666667	0.747384	0.854672	0.952328
102637213	'Gm34084'	lncRNA	0.06	0.06	0.13	0.06	0.06	0.04	0.0533333	0.0833333	1	1	2	1	1	1	1	1.33333	0.05	0.05	0.1	0.05	0.05	0.03	0.0433333	0.0666667	0.195119	0.907888	0.975955
102637261	'Gm27246'	lncRNA
102637283	'Pip5k1bos'	lncRNA
102637299	'Gm20714'	lncRNA
102637302	'Gm16976'	lncRNA	0.03	0.06	0.07	0.07	0.03	0.01	0.0366667	0.0533333	2	4	4.55	5	2	1	2.66667	3.51667	0.02	0.04	0.05	0.05	0.02	0.01	0.0266667	0.0366667	0.0844082	0.942217	0.975955
102637316	'Gm14249'	lncRNA
102637346	'Gm34181'	lncRNA
102637349	'Gm34184'	lncRNA
102637425	'Gm34235'	lncRNA	0	0	0.11	0	0	0.1	0.0333333	0.0366667	0	0	1	0	0	1	0.333333	0.333333	0	0	0.09	0	0	0.08	0.0266667	0.03	-0.214388	0.95686	0.975955
102637430	'Gm34240'	lncRNA
102637438	'Gm53063'	lncRNA
102637447	'Gm34253'	lncRNA	0	0	0.03	0	0.06	0	0.02	0.01	0	0	1	0	2	0	0.666667	0.333333	0	0	0.02	0	0.04	0	0.0133333	0.00666667	-1.03702	0.767463	0.952328
102637448	'Gm11732'	lncRNA
102637464	'Gm34267'	lncRNA	0.35	0.34	0.54	0.28	0.44	0.2	0.306667	0.41	12.63	9	15.01	8.36	12	9.16	9.84	12.2133	0.29	0.26	0.42	0.23	0.34	0.15	0.24	0.323333	0.103402	0.863469	0.956687
102637490	'Gm34284'	lncRNA
102637492	'A730035I17Rik'	lncRNA
102637514	'Gm34304'	lncRNA
102637520	'Gm34307'	lncRNA
102637542	'Gm13872'	lncRNA	0.12	0.16	0.03	0.03	0.03	0.03	0.03	0.103333	4	5	1	1	1	1	1	3.33333	0.1	0.13	0.03	0.02	0.02	0.02	0.02	0.0866667	1.52985	0.288942	0.653405
102637604	'Gm34371'	lncRNA
102637613	'Gm12092'	lncRNA
102637643	'Gm34403'	lncRNA	0	0.15	0.08	0.04	0.15	0.04	0.0766667	0.0766667	0	5	2	1	4	1	2	2.33333	0	0.12	0.06	0.03	0.12	0.03	0.06	0.06	0.02382	0.987615	0.993231
102637672	'Gm26787'	lncRNA
102637682	'Gm26682'	lncRNA	0.05	0	0	0.05	0.06	0.06	0.0566667	0.0166667	1	0	0	1	1	1	1	0.333333	0.04	0	0	0.04	0.04	0.04	0.04	0.0133333	-1.69594	0.471359	0.842497
102637782	'Gm34507'	lncRNA	0.84	0.57	0.63	0.74	0.5	0.84	0.693333	0.68	22	18	19	22	15	26	21	19.6667	0.69	0.45	0.49	0.6	0.38	0.65	0.543333	0.543333	-0.315052	0.497538	0.866053
102637792	'LOC102637792'	lncRNA	0.07	0.08	0.45	0.14	0.07	0.15	0.12	0.2	1	1	1	2	1	2	1.66667	1	0.06	0.06	0.35	0.11	0.06	0.11	0.0933333	0.156667	-0.96301	0.545706	0.895442
102637797	'A330015K06Rik'	lncRNA	0.09	0.04	0.41	0.05	0.38	0.05	0.16	0.18	3	3	12	4	4	4	4	6	0.08	0.03	0.32	0.04	0.29	0.04	0.123333	0.143333	0.357026	0.711493	0.952328
102637866	'Gm34568'	lncRNA
102637926	'Gm16108'	lncRNA
102637941	'Gm12602'	lncRNA	0.59	0.21	0.21	0	0.4	0.77	0.39	0.336667	3	2	2	0	4	4	2.66667	2.33333	0.49	0.16	0.16	0	0.31	0.59	0.3	0.27	-0.376713	0.779669	0.952328
102637946	'Gm34632'	lncRNA	0.09	0.06	0.06	0.09	0.08	0.08	0.0833333	0.07	5	3	3	5	4	4	4.33333	3.66667	0.08	0.05	0.05	0.07	0.06	0.06	0.0633333	0.06	-0.453803	0.632725	0.944744
102637961	'Gm34643'	lncRNA	0	0	0	0.07	0	0	0.0233333	0	0	0	0	1	0	0	0.333333	0	0	0	0	0.06	0	0	0.02	0	-1.17617	0.773161	0.952328
102637967	'Gm34647'	lncRNA	0.04	0.18	0.21	0.35	0.16	0.25	0.253333	0.143333	2.07	8.73	10.71	17.88	7.6	11.89	12.4567	7.17	0.03	0.14	0.16	0.28	0.12	0.19	0.196667	0.11	-1.05294	0.173314	0.471378
102638002	'Gm15222'	lncRNA	0.31	0	0	0.27	0.3	0	0.19	0.103333	1	0	0	1	1	0	0.666667	0.333333	0.25	0	0	0.22	0.23	0	0.15	0.0833333	-1.1052	0.704725	0.952328
102638005	'Gm11734'	lncRNA	0	0	0	0	0.03	0.02	0.0166667	0	0	0	0	0	1	1	0.666667	0	0	0	0	0	0.02	0.02	0.0133333	0	-2.04168	0.596122	0.923935
102638008	'Gm38505'	lncRNA
102638016	'Gm17382'	lncRNA	0.17	0.55	0.41	0.07	0.28	0.13	0.16	0.376667	7	11	14	3	11	5	6.33333	10.6667	0.14	0.43	0.32	0.06	0.21	0.1	0.123333	0.296667	0.553082	0.460861	0.831878
102638038	'Gm15631'	lncRNA
102638039	'Gm34703'	lncRNA	0	0.13	0	0	0	0	0	0.0433333	0	1	0	0	0	0	0	0.333333	0	0.1	0	0	0	0	0	0.0333333	0.747384	0.854672	0.952328
102638085	'Gm17695'	lncRNA
102638104	'Gm34746'	lncRNA	17.01	28.43	33.88	173.36	20.09	53.15	82.2	26.44	189.01	295.55	342.03	2021.58	219.37	583.83	941.593	275.53	13.98	22.42	26.34	141.48	15.37	41.09	65.98	20.9133	-2.04477	0.0222119	0.107209
102638120	'Gm34758'	lncRNA	1.41	1.48	1.68	1.94	0.74	0.57	1.08333	1.52333	16	14	13	15	9	7.5	10.5	14.3333	1.16	1.16	1.31	1.59	0.56	0.44	0.863333	1.21	0.251382	0.671572	0.952328
102638208	'Gm15569'	lncRNA	0.18	0	0	0	0	0	0	0.06	1	0	0	0	0	0	0	0.333333	0.15	0	0	0	0	0	0	0.05	0.747384	0.854672	0.952328
102638221	'Gm14637'	lncRNA
102638285	'Gm13415'	lncRNA	0.09	0	0.05	0	0.05	0.03	0.0266667	0.0466667	7	0	4	0	4	2	2	3.66667	0.07	0	0.04	0	0.04	0.02	0.02	0.0366667	0.715763	0.650333	0.952328
102638296	'Gm17102'	lncRNA	0.22	0.3	0.16	0.21	0.15	0.17	0.176667	0.226667	16	21	11	16	11	12	13	16	0.18	0.24	0.12	0.17	0.12	0.13	0.14	0.18	0.0800154	0.884326	0.966231
102638326	'Gm34917'	lncRNA	2.3	2.28	2.2	2	2.14	1.81	1.98333	2.26	90	98	83	79	89	76	81.3333	90.3333	1.89	1.79	1.71	1.63	1.64	1.4	1.55667	1.79667	-0.0603888	0.790815	0.952328
102638371	'Gm11958'	lncRNA	0	0.03	0	0	0	0	0	0.01	0	1	0	0	0	0	0	0.333333	0	0.03	0	0	0	0	0	0.01	0.747384	0.854672	0.952328
102638408	'Gm16174'	lncRNA	11.25	7.39	3.59	4.47	4.19	5.45	4.70333	7.41	86	63	20	44	26	41	37	56.3333	9.24	5.83	2.79	3.65	3.2	4.22	3.69	5.95333	0.393872	0.453794	0.825777
102638434	'Gm16537'	lncRNA	0.28	0.15	0.31	0.27	0.64	0.28	0.396667	0.246667	4	2	4	4	9	4	5.66667	3.33333	0.23	0.12	0.24	0.22	0.49	0.22	0.31	0.196667	-0.960536	0.309553	0.680104
102638436	'Gm38509'	lncRNA	0.05	0.02	0.02	0.01	0.01	0.02	0.0133333	0.03	7.4	2.59	3.61	1.87	1.2	3.3	2.12333	4.53333	0.04	0.01	0.02	0.01	0.01	0.02	0.0133333	0.0233333	1.05862	0.400284	0.780876
102638502	'Gm10612'	lncRNA	0.34	0.21	0.37	0.21	0.18	0.18	0.19	0.306667	14	8	14	9	7	7	7.66667	12	0.28	0.16	0.29	0.17	0.13	0.14	0.146667	0.243333	0.429779	0.505539	0.872514
102638507	'Gm26684'	lncRNA	4.75	3.03	3.12	0.75	1.33	1.36	1.14667	3.63333	764.13	595.28	486.57	162.61	280.38	255.35	232.78	615.327	3.9	2.39	2.42	0.62	1.02	1.05	0.896667	2.90333	1.20739	5.95538e-07	1.53332e-05
102638611	'Gm35135'	lncRNA
102638632	'Gm26641'	lncRNA	0	0	0.19	0.08	0	0.18	0.0866667	0.0633333	0	0	2	1	0	2	1	0.666667	0	0	0.15	0.07	0	0.14	0.07	0.05	-0.851715	0.736229	0.952328
102638649	'Gm35162'	lncRNA	0.68	0.44	1.26	0.18	0	0	0.06	0.793333	2	2	4	1	0	0	0.333333	2.66667	0.56	0.35	0.98	0.15	0	0	0.05	0.63	2.6747	0.156937	0.44217
102638651	'Gm35164'	lncRNA	3.43	0.33	1.86	0.07	1.29	1.22	0.86	1.87333	11	7	2	1	4	3	2.66667	6.66667	2.81	0.26	1.44	0.06	0.99	0.94	0.663333	1.50333	1.1401	0.284196	0.64629
102638670	'4930578G10Rik'	lncRNA	7.87	13.85	14.36	15.93	12.21	13.06	13.7333	12.0267	304.06	477.02	479.98	707.45	443.83	587.89	579.723	420.353	6.46	10.92	11.17	13	9.34	10.1	10.8133	9.51667	-0.697069	0.00433328	0.0295631
102638693	'Gm35194'	lncRNA
102638712	'Gm35206'	lncRNA	50.83	50.2	51.51	38.87	42.86	43.06	41.5967	50.8467	8359.36	7906.49	7910.45	6518.56	6821.74	6763.91	6701.4	8058.77	41.75	39.58	40.05	31.72	32.78	33.29	32.5967	40.46	0.0528145	0.582346	0.921915
102638722	'Gm35216'	lncRNA
102638742	'Gm35234'	lncRNA
102638744	'Gm12784'	lncRNA
102638756	'Gm35244'	lncRNA
102638827	'Gm14696'	lncRNA
102638853	'Gm27227'	lncRNA	0	0.02	0	0	0.02	0	0.00666667	0.00666667	0	1	0	0	1	0	0.333333	0.333333	0	0.01	0	0	0.01	0	0.00333333	0.00333333	-0.214388	0.957338	0.975955
102638890	'Gm15270'	lncRNA	3.65	1.64	3.09	1.23	1.57	1.09	1.29667	2.79333	84.68	94.05	92.92	67.31	81.4	64.24	70.9833	90.55	3	1.29	2.4	1.01	1.2	0.85	1.02	2.23	0.137066	0.554796	0.902467
102638940	'Gm19605'	lncRNA	2.33	4.12	2.08	1.41	1.44	2.06	1.63667	2.84333	26	35	23	18	18	18	18	28	1.91	3.25	1.62	1.15	1.1	1.59	1.28	2.26	0.422702	0.323328	0.695404
102638941	'Gm12853'	lncRNA
102638947	'Gm26844'	lncRNA
102638951	'Gm35386'	lncRNA
102638980	'Gm47415'	lncRNA	0.03	0.02	0.07	0.02	0.02	0.02	0.02	0.04	2.21	1	4	1	1.02	1	1.00667	2.40333	0.03	0.01	0.05	0.01	0.01	0.01	0.01	0.03	1.00249	0.512448	0.877458
102638993	'Gm19765'	lncRNA	1.22	1.57	0.98	0.31	1.05	0.59	0.65	1.25667	19	23	14	5	16	9	10	18.6667	1.01	1.24	0.77	0.25	0.81	0.46	0.506667	1.00667	0.707154	0.235377	0.57613
102639053	'Gm16222'	lncRNA	0.07	0.03	0.07	0.09	0.07	0.04	0.0666667	0.0566667	2	1	2.02	2.76	1.99	1.04	1.93	1.67333	0.05	0.03	0.06	0.07	0.05	0.03	0.05	0.0466667	0.0989505	0.947832	0.975955
102639087	'Gm35486'	lncRNA	0.33	0.31	0.37	0.28	0.32	0.34	0.313333	0.336667	23	21	24	20	22	23	21.6667	22.6667	0.27	0.25	0.28	0.23	0.25	0.26	0.246667	0.266667	-0.14837	0.719216	0.952328
102639102	'Gm35496'	lncRNA
102639115	'Gm15343'	lncRNA	12.07	10.48	8.86	4.79	8.03	8.72	7.18	10.47	984	833	669	427	646	684	585.667	828.667	9.91	8.27	6.89	3.91	6.14	6.74	5.59667	8.35667	0.299004	0.16614	0.458501
102639138	'Gm35521'	lncRNA
102639142	'Gm35525'	lncRNA
102639145	'Gm17315'	lncRNA	0	0	0	0.03	0	0.03	0.02	0	0	0	0	1	0	1	0.666667	0	0	0	0	0.03	0	0.03	0.02	0	-2.11052	0.577327	0.91802
102639175	'Gm35546'	lncRNA	0.06	0.37	2.24	0.16	0	0.2	0.12	0.89	4	11	84	5	0	3	2.66667	33	0.05	0.29	1.74	0.13	0	0.15	0.0933333	0.693333	3.35105	0.00372318	0.0261161
102639185	'Gm35554'	lncRNA
102639186	'Gm26644'	lncRNA
102639225	'Gm35584'	lncRNA	0.09	0	0	0	0	0	0	0.03	1	0	0	0	0	0	0	0.333333	0.08	0	0	0	0	0	0	0.0266667	0.747384	0.854672	0.952328
102639244	'Gm35600'	lncRNA
102639254	'Gm35607'	lncRNA	0.07	0	0.17	0.12	0.08	0.04	0.08	0.08	2.94	0	3.93	6.79	2.82	1.98	3.86333	2.29	0.06	0	0.13	0.1	0.06	0.03	0.0633333	0.0633333	-1.08728	0.456426	0.82783
102639259	'Gm35612'	lncRNA	3.18	3.67	7.11	2.44	2.87	2.75	2.68667	4.65333	47.31	67.66	75.7	24.59	49.17	48.5	40.7533	63.5567	2.61	2.89	5.53	1.99	2.19	2.13	2.10333	3.67667	0.43417	0.221366	0.556138
102639268	'Gm13830'	lncRNA	0.35	0.28	0.49	0.13	0.39	0.13	0.216667	0.373333	18	11.24	17	6	15	7	9.33333	15.4133	0.29	0.22	0.38	0.1	0.3	0.1	0.166667	0.296667	0.521797	0.398965	0.779902
102639277	'Gm35625'	lncRNA
102639290	'Gm11963'	lncRNA	9	13.29	9.21	6.61	7.8	5.96	6.79	10.5	519	672	551	379	446	394	406.333	580.667	7.39	10.48	7.16	5.4	5.97	4.61	5.32667	8.34333	0.30216	0.0360546	0.15479
102639339	'Gm26559'	lncRNA	0	0	0.02	0.02	0	0.03	0.0166667	0.00666667	0	0	1	1	0	2	1	0.333333	0	0	0.01	0.01	0	0.03	0.0133333	0.00333333	-1.72324	0.517341	0.877628
102639352	'Gm35685'	lncRNA
102639365	'Gm35695'	lncRNA
102639375	'Gm29514'	lncRNA	0.39	0.46	0.3	0.38	0.47	0.42	0.423333	0.383333	23.03	24.59	15.55	22.01	25.53	19.4	22.3133	21.0567	0.32	0.36	0.23	0.31	0.36	0.33	0.333333	0.303333	-0.298819	0.501108	0.869314
102639395	'Gm35721'	lncRNA	0.02	0	0	0.02	0	0	0.00666667	0.00666667	1	0	0	1	0	0	0.333333	0.333333	0.02	0	0	0.02	0	0	0.00666667	0.00666667	-0.214388	0.956135	0.975955
102639396	'Gm35722'	lncRNA	0.38	0.2	0.31	0.37	0.21	0.62	0.4	0.296667	4.79	2.31	3.57	4.85	2.55	7.68	5.02667	3.55667	0.31	0.15	0.24	0.3	0.16	0.48	0.313333	0.233333	-0.752935	0.472465	0.842553
102639399	'Gm35725'	lncRNA
102639404	'Gm26839'	lncRNA	0.37	0.44	0.65	0.45	0.48	1.07	0.666667	0.486667	15	17	24.67	19	15.83	41.99	25.6067	18.89	0.3	0.34	0.51	0.37	0.37	0.83	0.523333	0.383333	-0.648718	0.225445	0.560938
102639424	'Gm35742'	lncRNA	0	0.19	0	0.08	0	0	0.0266667	0.0633333	0	2	0	1	0	0	0.333333	0.666667	0	0.15	0	0.07	0	0	0.0233333	0.05	0.669639	0.848214	0.952328
102639427	'Gm16169'	lncRNA	0	0	0.04	0.02	0	0	0.00666667	0.0133333	0	0	2	1	0	0	0.333333	0.666667	0	0	0.03	0.01	0	0	0.00333333	0.01	0.651818	0.852554	0.952328
102639473	'Gm14273'	lncRNA
102639500	'Gm35801'	lncRNA
102639552	'Gm12111'	lncRNA	0	0	0.4	3.62	0	0	1.20667	0.133333	0	0	0.25	3.74	0	0	1.24667	0.0833333	0	0	0.31	2.95	0	0	0.983333	0.103333	-2.72352	0.494947	0.863698
102639566	'Ptgs2os2'	lncRNA
102639568	'A930005G22Rik'	lncRNA
102639588	'Gm11967'	lncRNA	16.31	15.46	12.96	8.31	5.75	5.6	6.55333	14.91	228.15	224.18	182	116	77	89	94	211.443	13.4	12.19	10.08	6.78	4.4	4.33	5.17	11.89	0.947993	0.000126398	0.00155649
102639677	'Gm35932'	lncRNA	0	0	0	0	0.09	0	0.03	0	0	0	0	0	1	0	0.333333	0	0	0	0	0	0.07	0	0.0233333	0	-1.17617	0.773161	0.952328
102639746	'Gm29595'	lncRNA
102639747	'Gm35986'	lncRNA	6.84	6.22	6.58	5	4.47	3.68	4.38333	6.54667	81	69	71	62	52	43	52.3333	73.6667	5.62	4.9	5.12	4.08	3.42	2.84	3.44667	5.21333	0.277813	0.330989	0.703589
102639757	'Gm35993'	lncRNA	11.51	11.33	9.82	5.43	8.74	7.7	7.29	10.8867	73	75	64	39	57	55	50.3333	70.6667	9.46	8.93	7.63	4.44	6.68	5.95	5.69	8.67333	0.281775	0.31229	0.682634
102639759	'Gm35994'	lncRNA
102639762	'Gm3787'	lncRNA	8.24	4.16	3.07	4.76	11.5	4.37	6.87667	5.15667	34	17	11	21	42	18	27	20.6667	6.77	3.28	2.39	3.88	8.79	3.38	5.35	4.14667	-0.567267	0.314615	0.685405
102639769	'Gm36001'	lncRNA
102639815	'Gm36037'	lncRNA	0	0	0.02	0	0	0	0	0.00666667	0	0	1	0	0	0	0	0.333333	0	0	0.01	0	0	0	0	0.00333333	0.747384	0.854672	0.952328
102639848	'Gm12532'	lncRNA	0	0	0	0.01	0	0	0.00333333	0	0	0	0	1	0	0	0.333333	0	0	0	0	0.01	0	0	0.00333333	0	-1.17617	0.773161	0.952328
102639855	'Gm36069'	lncRNA
102639882	'1700016K05Rik'	lncRNA	0.11	0.46	0.12	0.11	0.06	0.06	0.0766667	0.23	2	8	2	2	1	1	1.33333	4	0.09	0.36	0.09	0.09	0.04	0.04	0.0566667	0.18	1.35588	0.309653	0.680159
102639897	'Gm36099'	lncRNA
102639908	'Gm36109'	lncRNA	0.62	0.67	1.22	1.72	1.31	2	1.67667	0.836667	45.11	46	47.43	34.48	34.16	49.4	39.3467	46.18	0.51	0.53	0.95	1.4	1	1.55	1.31667	0.663333	0.0215959	0.947324	0.975955
102639918	'Gm36117'	lncRNA	1.32	1.44	1.26	0.76	1.39	1.27	1.14	1.34	314.93	328.32	327.58	179.99	298.14	254.16	244.097	323.61	1.09	1.14	0.98	0.62	1.06	0.98	0.886667	1.07	0.201693	0.275822	0.634397
102639949	'Gm36141'	lncRNA
102639979	'4933406J09Rik'	lncRNA
102639992	'Gm36173'	lncRNA
102640031	'Gm36201'	lncRNA	0	0.03	0	0	0	0	0	0.01	0	1	0	0	0	0	0	0.333333	0	0.02	0	0	0	0	0	0.00666667	0.747384	0.854672	0.952328
102640042	'Gm29593'	lncRNA	0.04	0	0	0	0	0	0	0.0133333	1	0	0	0	0	0	0	0.333333	0.04	0	0	0	0	0	0	0.0133333	0.747384	0.854672	0.952328
102640074	'Gm36229'	lncRNA	0	0	0.05	0.04	0	0	0.0133333	0.0166667	0	0	1	1	0	0	0.333333	0.333333	0	0	0.04	0.04	0	0	0.0133333	0.0133333	-0.214388	0.95654	0.975955
102640117	'Gm15201'	lncRNA
102640133	'Gm19378'	lncRNA	20.26	21.49	23.32	22.74	21.29	23.54	22.5233	21.69	368.72	367.62	387.5	430.32	378.1	415.98	408.133	374.613	16.65	16.95	18.13	18.56	16.29	18.2	17.6833	17.2433	-0.342998	0.020058	0.0989911
102640140	'Gm16214'	lncRNA
102640148	'Gm36283'	lncRNA	0.72	0.81	1.33	1.24	1.13	1.34	1.23667	0.953333	45	35	70	73	62	70	68.3333	50	0.59	0.64	1.03	1.01	0.87	1.03	0.97	0.753333	-0.673214	0.0412894	0.171303
102640163	'Gm29480'	lncRNA	0.15	0.05	0.08	0.02	0	0	0.00666667	0.0933333	6	2	3	1	0	0	0.333333	3.66667	0.12	0.04	0.06	0.02	0	0	0.00666667	0.0733333	3.15353	0.0765327	0.269993
102640192	'Gm15510'	lncRNA	0.74	0.58	0.84	0.63	0.21	0.46	0.433333	0.72	20	12	19	13.01	12	12	12.3367	17	0.61	0.46	0.65	0.51	0.16	0.36	0.343333	0.573333	0.249253	0.637324	0.947629
102640242	'Gm36356'	lncRNA
102640250	'Gm2885'	lncRNA	0.03	0.11	0.07	0	0.1	0	0.0333333	0.07	1	3	2	0	3	0	1	2	0.03	0.08	0.06	0	0.08	0	0.0266667	0.0566667	0.833888	0.655628	0.952328
102640282	'Gm26885'	lncRNA	0.79	1.07	1.43	1.72	1.11	1.16	1.33	1.09667	29.99	38.84	36.67	49	28.66	28.79	35.4833	35.1667	0.65	0.84	1.11	1.4	0.85	0.89	1.04667	0.866667	-0.256387	0.519441	0.877826
102640305	'Gm36406'	lncRNA
102640359	'1700023D09Rik'	lncRNA	2.61	1.92	1.64	1.91	1.26	1.65	1.60667	2.05667	21	14	11	13	10	13	12	15.3333	2.15	1.51	1.28	1.56	0.96	1.27	1.26333	1.64667	0.141244	0.802497	0.952328
102640368	'Cd55os'	lncRNA	0.08	0.11	0.08	0.12	0.11	0.06	0.0966667	0.09	5	7	5	8	7	4	6.33333	5.66667	0.06	0.09	0.06	0.1	0.08	0.05	0.0766667	0.07	-0.377105	0.635548	0.946785
102640379	'Gm11716'	lncRNA
102640387	'Gm36457'	lncRNA	1.19	0.89	0.83	0.26	0.76	0.85	0.623333	0.97	17	15	12	6	10	12	9.33333	14.6667	0.98	0.7	0.64	0.21	0.58	0.66	0.483333	0.773333	0.446524	0.449444	0.822312
102640405	'Gm36470'	lncRNA	0	0.11	0.11	0	0.52	0	0.173333	0.0733333	0	1	1	0	4	0	1.33333	0.666667	0	0.09	0.09	0	0.4	0	0.133333	0.06	-1.15928	0.641658	0.949886
102640440	'Gm28857'	lncRNA	5.26	5.86	4.36	18.71	8.88	14.48	14.0233	5.16	45.61	48.33	37.13	177.7	75.68	130.3	127.893	43.69	4.32	4.62	3.39	15.27	6.79	11.19	11.0833	4.11	-1.78873	1.46295e-06	3.34347e-05
102640526	'Gm10353'	lncRNA	1.05	1.16	1.46	0.68	1.11	0.71	0.833333	1.22333	49	42	56	33	41	33	35.6667	49	0.86	0.92	1.14	0.56	0.85	0.55	0.653333	0.973333	0.247091	0.43592	0.810978
102640545	'Gm36582'	lncRNA
102640560	'Gm36595'	lncRNA	0	0	0	0	0	0.02	0.00666667	0	0	0	0	0	0	1	0.333333	0	0	0	0	0	0	0.02	0.00666667	0	-1.17617	0.773161	0.952328
102640562	'BB218582'	lncRNA	0.31	0.15	0.21	0	0.13	0	0.0433333	0.223333	7	4	4	0	2	0	0.666667	5	0.26	0.12	0.16	0	0.1	0	0.0333333	0.18	2.7341	0.0774909	0.272395
102640597	'Gm29571'	lncRNA	3.94	5.81	6.87	5.13	4.17	3.19	4.16333	5.54	80.17	104.46	78.17	101.42	77.75	63.58	80.9167	87.6	3.24	4.58	5.34	4.19	3.19	2.47	3.28333	4.38667	-0.100356	0.725182	0.952328
102640655	'Gm36669'	lncRNA
102640678	'Gm36691'	lncRNA	3.79	2.97	1.91	24.52	11.23	17	17.5833	2.89	226	246	118	1961	887	1198	1348.67	196.667	3.11	2.34	1.48	20.01	8.59	13.14	13.9133	2.31	-3.0077	1.33805e-18	2.76407e-16
102640735	'Gm36732'	lncRNA
102640746	'Gm36742'	lncRNA
102640755	'Gm36747'	lncRNA
102640764	'Gm36756'	lncRNA	0	0	0	0	0.05	0	0.0166667	0	0	0	0	0	1	0	0.333333	0	0	0	0	0	0.04	0	0.0133333	0	-1.17617	0.773161	0.952328
102640772	'2810414N06Rik'	lncRNA	2.72	2.63	2.45	0.89	1.5	1.18	1.19	2.6	89	78	71	30	49	38	39	79.3333	2.24	2.08	1.9	0.72	1.15	0.91	0.926667	2.07333	0.821047	0.00571123	0.0369759
102640779	'2900052L18Rik'	lncRNA	2.59	3.13	2.46	2.72	3.75	2.54	3.00333	2.72667	208	240	184	223	291	195	236.333	210.667	2.13	2.47	1.92	2.22	2.87	1.96	2.35	2.17333	-0.372746	0.0613486	0.229932
102640782	'Gm36766'	lncRNA
102640784	'Gm36768'	lncRNA	0.06	0.03	0.08	0.03	0.03	0.01	0.0233333	0.0566667	4	2	5	2	2	1	1.66667	3.66667	0.05	0.02	0.06	0.02	0.02	0.01	0.0166667	0.0433333	0.924519	0.447942	0.821186
102640811	'Gm11520'	lncRNA	1.04	0.49	0.1	1.1	0.36	1.32	0.926667	0.543333	6.24	2.5	1	6.62	1.99	7.5	5.37	3.24667	0.85	0.39	0.08	0.9	0.27	1.02	0.73	0.44	-0.859514	0.463952	0.834687
102640815	'Gm36793'	lncRNA
102640843	'Gm36814'	lncRNA
102640845	'Gm26994'	lncRNA
102640891	'Gm36849'	lncRNA
102640893	'Gm36851'	lncRNA	0.01	0.01	0.1	0.03	0.03	0.12	0.06	0.04	1	1	6	2	2	5	3	2.66667	0.01	0.01	0.08	0.02	0.02	0.09	0.0433333	0.0333333	-0.403946	0.750139	0.952328
102640894	'Gm16193'	lncRNA	0	0.07	0	0	0	0.07	0.0233333	0.0233333	0	1	0	0	0	1	0.333333	0.333333	0	0.05	0	0	0	0.05	0.0166667	0.0166667	-0.214388	0.956759	0.975955
102640923	'Gm10649'	lncRNA	0.16	0.05	0.19	0.07	0.07	0.07	0.07	0.133333	7	2	8	3	3	3	3	5.66667	0.13	0.04	0.15	0.05	0.05	0.05	0.05	0.106667	0.704696	0.479516	0.849216
102640951	'Gm15614'	lncRNA	0.39	0.46	0.48	0.23	0.55	0.37	0.383333	0.443333	14.23	16.3	16.44	8.55	19.75	13.02	13.7733	15.6567	0.32	0.37	0.37	0.18	0.42	0.28	0.293333	0.353333	0.000139587	0.999795	0.999945
102640956	'Gm36897'	lncRNA	0	0.14	0.05	0	0.02	0	0.00666667	0.0633333	0	6	2	0	1	0	0.333333	2.66667	0	0.11	0.04	0	0.02	0	0.00666667	0.05	2.66437	0.23475	0.575283
102640962	'Gm16348'	lncRNA	5.64	10.75	4.52	9.87	7.1	7.01	7.99333	6.97	343	625	256	615	419	409	481	408	4.63	8.48	3.51	8.06	5.43	5.42	6.30333	5.54	-0.463226	0.148284	0.426197
102640972	'Gm36908'	lncRNA	0.16	0.36	0.15	0.49	0.45	0.55	0.496667	0.223333	7.26	14	4.83	23.89	18.63	22.42	21.6467	8.69667	0.13	0.28	0.12	0.4	0.35	0.43	0.393333	0.176667	-1.5538	0.00963848	0.0560517
102641016	'F930026P19Rik'	lncRNA	0	0.02	0.05	0.07	0.09	0.16	0.106667	0.0233333	0	2	4	6	7	13	8.66667	2	0	0.02	0.04	0.06	0.07	0.13	0.0866667	0.02	-2.34556	0.024755	0.116365
102641120	'Gm29483'	lncRNA	3.18	2.06	2.86	1.03	0.79	2.01	1.27667	2.7	88	47	69	27	37	34	32.6667	68	2.61	1.63	2.23	0.84	0.61	1.56	1.00333	2.15667	0.853732	0.0163753	0.0848901
102641247	'Gm12339'	lncRNA	0.31	0.23	0.26	0.04	0.23	0.23	0.166667	0.266667	7	5	6	1	5	5	3.66667	6	0.25	0.18	0.2	0.03	0.17	0.18	0.126667	0.21	0.514567	0.583162	0.922153
102641270	'Gm38545'	lncRNA
102641286	'Gm14244'	lncRNA	1.13	1.09	0.95	0.89	1.04	0.96	0.963333	1.05667	199.68	184.1	157.04	159.24	178.21	161.46	166.303	180.273	0.93	0.86	0.74	0.72	0.8	0.74	0.753333	0.843333	-0.0930889	0.619335	0.93646
102641383	'Gm47708'	lncRNA	0	0	0	0	0	0.11	0.0366667	0	0	0	0	0	0	1	0.333333	0	0	0	0	0	0	0.08	0.0266667	0	-1.17617	0.773161	0.952328
102641432	'Gm38559'	lncRNA
102641467	'Gm20684'	lncRNA	10.87	10.04	12.16	5.19	8.22	5.66	6.35667	11.0233	318	278	299	120	218	168	168.667	298.333	8.93	7.91	9.46	4.24	6.29	4.38	4.97	8.76667	0.621966	0.00340089	0.0242772
102641476	'Gm38560'	lncRNA	0.77	0.48	0.75	0.19	0.38	0.26	0.276667	0.666667	17.65	11	14	4	9	8.79	7.26333	14.2167	0.63	0.38	0.58	0.15	0.29	0.2	0.213333	0.53	0.799399	0.214513	0.544724
102641617	'Gm27151'	lncRNA
102641621	'2900060N12Rik'	lncRNA	0	0.03	0	0.04	0.03	0	0.0233333	0.01	0	1	0	1	0.78	0	0.593333	0.333333	0	0.02	0	0.03	0.03	0	0.02	0.00666667	-0.214388	0.956441	0.975955
102641800	'Gm38576'	lncRNA
102641859	'Rsf1os2'	lncRNA	0.72	1.39	1.15	0.64	0.97	0.92	0.843333	1.08667	35	63	52	32	42	42	38.6667	50	0.59	1.09	0.89	0.53	0.74	0.71	0.66	0.856667	0.15533	0.648414	0.952328
102642202	'Gm15511'	lncRNA	0	0	0.07	0	0.06	0	0.02	0.0233333	0	0	1	0	1	0	0.333333	0.333333	0	0	0.05	0	0.05	0	0.0166667	0.0166667	-0.214388	0.957442	0.975955
102642414	'Platr3'	lncRNA
102688	'AU023762'	lncRNA	0	0.02	0.02	0.02	0	0.06	0.0266667	0.0133333	0	1.01	0.98	1	0	2.8	1.26667	0.663333	0	0.02	0.02	0.02	0	0.05	0.0233333	0.0133333	-1.72323	0.516978	0.877628
102800312	'Lncppara'	lncRNA	5.58	5.44	6.11	6.52	7.7	7.83	7.35	5.71	225.89	212.56	226.27	270.54	302.11	304.58	292.41	221.573	4.58	4.29	4.75	5.32	5.89	6.06	5.75667	4.54	-0.614745	3.32408e-05	0.000500452
103012	'Firre'	lncRNA	28.91	34.72	29.71	18.94	26.2	24.49	23.21	31.1133	1857.69	2001.34	1971.3	1351.41	1526.83	1265.5	1381.25	1943.44	23.75	27.38	23.1	15.46	20.04	18.93	18.1433	24.7433	0.28035	0.00518407	0.0342197
103175	'D630029K05Rik'	lncRNA	0	0	0	0.15	0	0	0.05	0	0	0	0	1	0	0	0.333333	0	0	0	0	0.12	0	0	0.04	0	-1.17617	0.773161	0.952328
103214	'Ifngas1'	lncRNA	0.14	0.04	0.04	0.09	0.1	0	0.0633333	0.0733333	2	1	1	2.42	2	0	1.47333	1.33333	0.12	0.03	0.03	0.07	0.08	0	0.05	0.06	-0.20137	0.906171	0.97515
103505	'BB019430'	lncRNA
104103	'Airn'	lncRNA	11.09	8.31	14.23	4.28	11.94	10.52	8.91333	11.21	483.39	366	537	194.04	518.98	441	384.673	462.13	9.11	6.55	11.07	3.49	9.13	8.13	6.91667	8.91	0.0708461	0.814018	0.952328
104522	'AU040972'	lncRNA	0	0	0.09	0	0.13	0.09	0.0733333	0.03	0	0	2	0	3	2	1.66667	0.666667	0	0	0.07	0	0.1	0.07	0.0566667	0.0233333	-1.52169	0.503825	0.871236
104692	'Gm12108'	lncRNA
104798	'Sfta3-ps'	lncRNA
104932	'AU015791'	lncRNA
105120	'AI197445'	lncRNA	0	0	1.52	0.26	0.07	0	0.11	0.506667	0	0	5	4	1	0	1.66667	1.66667	0	0	1.18	0.21	0.05	0	0.0866667	0.393333	-0.278485	0.898546	0.97231
105242419	'Gm38691'	lncRNA	0.04	0.04	0	0	0.09	0	0.03	0.0266667	1	1	0	0	2	0	0.666667	0.666667	0.03	0.04	0	0	0.07	0	0.0233333	0.0233333	-0.136985	0.960235	0.977288
105242579	'Gm42788'	lncRNA	0	0	0	0	0	0.04	0.0133333	0	0	0	0	0	0	1	0.333333	0	0	0	0	0	0	0.03	0.01	0	-1.17617	0.773161	0.952328
105242605	'Gm38773'	lncRNA
105242621	'Gm6117'	lncRNA
105242657	'Hoxaas2'	lncRNA	0.04	0.16	0.15	0.04	0.22	0.08	0.113333	0.116667	3	8	9	3	8	5	5.33333	6.66667	0.03	0.13	0.11	0.03	0.17	0.06	0.0866667	0.09	0.113952	0.893661	0.970808
105242658	'Hotairm1'	lncRNA	0.05	0.31	0.12	1.54	0	1.48	1.00667	0.16	0.66	4	1.5	4	0	3	2.33333	2.05333	0.04	0.25	0.09	1.26	0	1.15	0.803333	0.126667	-0.75262	0.664221	0.952328
105242735	'Gm38872'	lncRNA	0.59	1.47	0.43	0.19	0.8	1.09	0.693333	0.83	6	14	4	2	8	11	7	8	0.48	1.16	0.34	0.15	0.61	0.84	0.533333	0.66	-0.00982245	0.991031	0.995213
105242750	'Gm38882'	lncRNA	2.61	3.28	2.97	1.52	2.43	1.83	1.92667	2.95333	72	79	71	45	60	49	51.3333	74	2.14	2.59	2.31	1.24	1.86	1.41	1.50333	2.34667	0.318016	0.224578	0.559532
105242798	'1700055D16Rik'	lncRNA	0.08	0.16	0.25	0.51	0.15	0.46	0.373333	0.163333	1	2	3	7	2	6	5	2	0.06	0.13	0.19	0.42	0.12	0.36	0.3	0.126667	-1.56561	0.163365	0.453286
105242817	'Gm15543'	lncRNA
105242906	'Gm12763'	lncRNA	0.06	0.3	0.25	0.05	0.24	0.17	0.153333	0.203333	1	5	4	2	7	5	4.66667	3.33333	0.05	0.24	0.19	0.04	0.18	0.13	0.116667	0.16	-0.690761	0.509797	0.875102
105242966	'Gm16158'	lncRNA	0.23	0.09	0	0.03	0.19	0.18	0.133333	0.106667	5	1	0	1	3	1	1.66667	2	0.19	0.07	0	0.02	0.15	0.14	0.103333	0.0866667	0.102468	0.950313	0.975955
105243043	'Gm39079'	lncRNA	5.54	6.6	7.71	7.56	8.07	8.45	8.02667	6.61667	127.22	144.29	164.76	178.28	179.68	186.79	181.583	145.423	4.55	5.2	6	6.17	6.17	6.53	6.29	5.25	-0.5376	0.00306964	0.0224109
105243155	'Gm26795'	lncRNA	0.02	0	0	0	0	0.01	0.00333333	0.00666667	1	0	0	0	0	1	0.333333	0.333333	0.02	0	0	0	0	0.01	0.00333333	0.00666667	-0.214388	0.956448	0.975955
105243172	'Gm39164'	lncRNA
105243235	'Gm26721'	lncRNA
105243239	'Gm39213'	lncRNA	2.55	3.86	1.92	4.6	3.22	1.48	3.1	2.77667	15	17	8.25	22	17	9	16	13.4167	2.1	3.05	1.49	3.76	2.46	1.14	2.45333	2.21333	-0.477741	0.422214	0.799055
105243280	'Gm39244'	lncRNA
105243282	'4922502B01Rik'	lncRNA	0	0	0	0.01	0	0	0.00333333	0	0	0	0	1.01	0	0	0.336667	0	0	0	0	0.01	0	0	0.00333333	0	-1.17617	0.773161	0.952328
105243330	'Gm39283'	lncRNA
105243340	'Gm39289'	lncRNA
105243355	'Gm39302'	lncRNA
105243360	'Gm39307'	lncRNA	0	0	0	0.05	0	0	0.0166667	0	0	0	0	1	0	0	0.333333	0	0	0	0	0.04	0	0	0.0133333	0	-1.17617	0.773161	0.952328
105243385	'Gm39321'	lncRNA	0.02	0.04	0.03	0.06	0.05	0.02	0.0433333	0.03	1	2	1	2	2	1	1.66667	1.33333	0.02	0.03	0.02	0.05	0.04	0.02	0.0366667	0.0233333	-0.536672	0.721939	0.952328
105243469	'Gm27216'	lncRNA	31.18	32.22	26.97	35.16	33.75	31.33	33.4133	30.1233	497.89	588	407	736.8	729	594.63	686.81	497.63	25.61	25.4	20.97	28.69	25.81	24.22	26.24	23.9933	-0.678181	0.000191579	0.00222642
105243537	'Gm39429'	lncRNA
105243545	'Gm39436'	lncRNA
105243551	'1600015H23Rik'	lncRNA	0	0	0.12	0	0	0	0	0.04	0	0	1	0	0	0	0	0.333333	0	0	0.09	0	0	0	0	0.03	0.747384	0.854672	0.952328
105243573	'Gm19385'	lncRNA
105243704	'Gm39526'	lncRNA	10.28	10.09	10.71	7.77	9.38	8.97	8.70667	10.36	1348.69	1252.61	1308.58	1023.45	1185.88	1090.47	1099.93	1303.29	8.45	7.95	8.33	6.34	7.18	6.93	6.81667	8.24333	0.0338664	0.745331	0.952328
105243712	'Gm39529'	lncRNA	0.41	0.71	0.31	0.42	0.44	0.42	0.426667	0.476667	11.5	19	8.01	12.31	12	11.44	11.9167	12.8367	0.33	0.56	0.24	0.35	0.33	0.32	0.333333	0.376667	-0.095951	0.872465	0.960465
105243890	'Gm28822'	lncRNA	0.24	0.19	0.15	0.36	0.14	0.28	0.26	0.193333	7	5.23	4.08	11.02	4	7.92	7.64667	5.43667	0.2	0.15	0.12	0.3	0.11	0.22	0.21	0.156667	-0.686701	0.402155	0.782863
105243912	'Gm39631'	lncRNA	0	0	0.11	0	0	0	0	0.0366667	0	0	7	0	0	0	0	2.33333	0	0	0.09	0	0	0	0	0.03	3.41668	0.30994	0.680504
105243940	'Pard3bos2'	lncRNA
105243991	'Gm37294'	lncRNA	0.14	0.04	0.04	0.14	0.22	0.18	0.18	0.0733333	4	1	1	4	6	5	5	2	0.12	0.03	0.03	0.11	0.17	0.14	0.14	0.06	-1.51607	0.170624	0.466689
105244010	'Gm37065'	lncRNA	0.17	0	0.19	0.16	0.47	0.47	0.366667	0.12	1.02	0	0.99	1	2.77	2.85	2.20667	0.67	0.14	0	0.15	0.13	0.36	0.36	0.283333	0.0966667	-2.42205	0.242907	0.586693
105244050	'Gm15509'	lncRNA	0.03	0	0.03	0	0	0.02	0.00666667	0.02	2	0	2	0	0	1	0.333333	1.33333	0.02	0	0.03	0	0	0.01	0.00333333	0.0166667	1.68781	0.504655	0.871552
105244102	'Gm13421'	lncRNA	3.22	3.29	3.23	1.7	2.04	1.59	1.77667	3.24667	160	176	154	73	109	79	87	163.333	2.65	2.6	2.51	1.39	1.56	1.23	1.39333	2.58667	0.702147	0.00110491	0.0096158
105244117	'Gm13524'	lncRNA	0	0	0	0.04	0.04	0	0.0266667	0	0	0	0	1	1	0	0.666667	0	0	0	0	0.03	0.03	0	0.02	0	-2.06659	0.589303	0.923935
105244126	'Gm39794'	lncRNA	1.9	1.55	2.08	1.68	1.3	3.17	2.05	1.84333	21	17	24	23	15	42	26.6667	20.6667	1.56	1.22	1.62	1.37	0.99	2.45	1.60333	1.46667	-0.593367	0.245129	0.590188
105244210	'Gm39859'	lncRNA	4.26	5.61	4.54	3.9	4.59	5.11	4.53333	4.80333	421.01	551.22	411.65	339.78	462.99	394.92	399.23	461.293	3.5	4.42	3.53	3.18	3.51	3.95	3.54667	3.81667	0.00198963	0.990683	0.994976
105244227	'Gm39874'	lncRNA	0.72	0.57	0.76	0.59	0.63	0.73	0.65	0.683333	13	15	13	13	15	19	15.6667	13.6667	0.59	0.45	0.59	0.48	0.48	0.56	0.506667	0.543333	-0.411091	0.421346	0.798353
105244259	'4930527A07Rik'	lncRNA
105244278	'Gm39918'	lncRNA	0.45	0.74	0.81	1.04	1.03	0.85	0.973333	0.666667	19	27.12	26.43	39	44	34	39	24.1833	0.37	0.58	0.63	0.85	0.79	0.66	0.766667	0.526667	-0.915276	0.0117899	0.0656807
105244328	'Gm14161'	lncRNA
105244359	'Gm14268'	lncRNA
105244370	'Gm14261'	lncRNA
105244374	'Gm14250'	lncRNA
105244484	'Gm40085'	lncRNA	0.36	0.23	0.18	0.12	0.2	0.2	0.173333	0.256667	15	9	7	5	8	8	7	10.3333	0.3	0.18	0.14	0.1	0.15	0.16	0.136667	0.206667	0.362397	0.60549	0.926559
105244487	'Gm19439'	lncRNA	0.04	0.08	0.04	0	0	0	0	0.0533333	1	3	1	0	0	0	0	1.66667	0.03	0.06	0.03	0	0	0	0	0.04	2.9606	0.235122	0.57577
105244587	'Gm40178'	lncRNA	0	0	0.01	0	0.01	0	0.00333333	0.00333333	0	0	1	0	1	0	0.333333	0.333333	0	0	0.01	0	0.01	0	0.00333333	0.00333333	-0.214388	0.957442	0.975955
105244624	'Gm12708'	lncRNA
105244630	'Gm26520'	lncRNA	0.56	0.66	0.42	0.09	0.28	0.03	0.133333	0.546667	19	21	13	3	9	1	4.33333	17.6667	0.46	0.52	0.32	0.07	0.21	0.02	0.1	0.433333	1.8404	0.017402	0.0888538
105244641	'Gm12724'	lncRNA
105244644	'Lrp8os3'	lncRNA
105244649	'LOC105244649'	lncRNA
105244662	'Cyp4x1os'	lncRNA	0.02	0	0	0	0	0.06	0.02	0.00666667	1	0	0	0	0	3	1	0.333333	0.02	0	0	0	0	0.05	0.0166667	0.00666667	-1.70945	0.588257	0.923935
105244841	'Gm40376'	lncRNA	9.21	18.05	33.42	0.2	0.78	1.04	0.673333	20.2267	336	924.31	1673.93	11.34	41.05	54	35.4633	978.08	7.56	14.23	25.99	0.17	0.6	0.8	0.523333	15.9267	4.57327	3.05032e-08	1.11655e-06
105244862	'Gm29007'	lncRNA
105244876	'Gm17089'	lncRNA
105244960	'Gm40478'	lncRNA	0.05	0	0	0	0	0	0	0.0166667	1	0	0	0	0	0	0	0.333333	0.04	0	0	0	0	0	0	0.0133333	0.747384	0.854672	0.952328
105245027	'Gm26611'	lncRNA
105245120	'Gm40614'	lncRNA	0	0	0	0	0.04	0	0.0133333	0	0	0	0	0	1	0	0.333333	0	0	0	0	0	0.03	0	0.01	0	-1.17617	0.773161	0.952328
105245123	'Gm40617'	lncRNA	0.09	0	0	0.08	0	0	0.0266667	0.03	1	0	0	1	0	0	0.333333	0.333333	0.07	0	0	0.07	0	0	0.0233333	0.0233333	-0.214388	0.956135	0.975955
105245134	'Gm40627'	lncRNA
105245158	'Gm40650'	lncRNA
105245193	'4930563J15Rik'	lncRNA
105245243	'Gm40722'	lncRNA
105245255	'Gm40733'	lncRNA
105245359	'4930470G03Rik'	lncRNA	0.34	0.27	0.26	0.33	0.44	0.53	0.433333	0.29	21	16	15	21	27	32	26.6667	17.3333	0.28	0.21	0.2	0.27	0.34	0.41	0.34	0.23	-0.8298	0.0598938	0.226294
105245369	'Gm3625'	lncRNA	0.34	0.41	0.17	0.31	0.26	0.31	0.293333	0.306667	15	17	7	14	11	13	12.6667	13	0.28	0.32	0.13	0.25	0.2	0.24	0.23	0.243333	-0.177241	0.764893	0.952328
105245474	'Gm40923'	lncRNA
105245515	'Gm40962'	lncRNA	0	0	0	0.06	0	0.06	0.04	0	0	0	0	1	0	1	0.666667	0	0	0	0	0.05	0	0.05	0.0333333	0	-2.11052	0.577327	0.91802
105245595	'Gm29543'	lncRNA
105245613	'LOC105245613'	lncRNA
105245634	'Gm41062'	lncRNA	2.12	1.42	3.67	1.67	0.33	0.8	0.933333	2.40333	13	8	20	11	2	5	6	13.6667	1.74	1.12	2.85	1.36	0.25	0.62	0.743333	1.90333	0.943362	0.234438	0.575071
105245650	'Gm41077'	lncRNA	0.06	0.25	0.17	0.11	0.11	0.13	0.116667	0.16	4	15	10	7	7	8	7.33333	9.66667	0.05	0.19	0.13	0.09	0.09	0.1	0.0933333	0.123333	0.17396	0.812653	0.952328
105245780	'Gm15918'	lncRNA	0.13	0.2	0.16	0.18	0.07	0.03	0.0933333	0.163333	7	7	6	9	5	2	5.33333	6.66667	0.11	0.16	0.13	0.15	0.05	0.02	0.0733333	0.133333	0.0985347	0.908129	0.975955
105245784	'Gm41177'	lncRNA
105245841	'Gm41230'	lncRNA
105245866	'4930594M22Rik'	lncRNA	0.51	0.58	0.77	0.35	0.42	1.61	0.793333	0.62	27	52	31	41	47	60	49.3333	36.6667	0.42	0.45	0.6	0.28	0.32	1.25	0.616667	0.49	-0.645318	0.0815206	0.282125
105245869	'Gm4675'	lncRNA
105245876	'Gm41259'	lncRNA	0.81	0.75	0.48	0.82	0.99	1.62	1.14333	0.68	18	14	10	19	21	26	22	14	0.66	0.59	0.37	0.67	0.75	1.25	0.89	0.54	-0.8612	0.0792621	0.276549
105245898	'Gm41279'	lncRNA	0	0.02	0	0	0.03	0.03	0.02	0.00666667	0	1	0	0	2	2	1.33333	0.333333	0	0.01	0	0	0.03	0.03	0.02	0.00333333	-2.08174	0.401682	0.782458
105245909	'Gm41289'	lncRNA
105245924	'Gm16136'	lncRNA	0	0	0.11	0.15	0.1	0	0.0833333	0.0366667	0	0	2	3	2	0	1.66667	0.666667	0	0	0.09	0.12	0.08	0	0.0666667	0.03	-1.5671	0.489672	0.859464
105246020	'Gm26760'	lncRNA	0.52	0.59	0.31	0.14	0.21	0.13	0.16	0.473333	15.91	14	17.38	8	17.8	10.96	12.2533	15.7633	0.43	0.47	0.24	0.11	0.16	0.1	0.123333	0.38	0.192647	0.728001	0.952328
105246046	'LOC105246046'	lncRNA	1.82	2.67	1.93	1.21	1.4	1.61	1.40667	2.14	48	67	47	33	36	41	36.6667	54	1.49	2.11	1.5	0.99	1.07	1.24	1.1	1.7	0.343561	0.2873	0.651
105246056	'Gm9828'	lncRNA	0.79	0.68	0.86	0.7	0.76	0.87	0.776667	0.776667	22	26	24	21	25	25	23.6667	24	0.65	0.53	0.67	0.57	0.58	0.68	0.61	0.616667	-0.193047	0.628241	0.941195
105246064	'Gm41414'	lncRNA
105246071	'4930509G22Rik'	lncRNA	0.53	0.88	0.9	0.82	0.71	0.87	0.8	0.77	36	47.58	57.93	42.93	45.96	49.83	46.24	47.17	0.43	0.69	0.7	0.67	0.54	0.67	0.626667	0.606667	-0.176766	0.573304	0.917948
105246089	'C730014E05Rik'	lncRNA	61.43	54.01	54.48	31.85	39.06	35.37	35.4267	56.64	2215	1866	2061	1234	1505	1369	1369.33	2047.33	50.46	42.58	42.36	25.99	29.88	27.34	27.7367	45.1333	0.371615	0.0024027	0.0182726
105246150	'Gm41486'	lncRNA
105246151	'4930590A17Rik'	lncRNA
105246244	'Itpr3os'	lncRNA
105246271	'Gm4577'	lncRNA
105246278	'B230354K17Rik'	lncRNA	2.4	2.79	2.22	1.96	2.27	2.23	2.15333	2.47	159.01	177	137	133	146	130	136.333	157.67	1.97	2.2	1.73	1.6	1.74	1.73	1.69	1.96667	-0.00211182	0.99138	0.995306
105246296	'Gm41600'	lncRNA	1.86	1.26	1.55	1.19	1.44	1.76	1.46333	1.55667	114.76	74.04	88.81	74.91	85.93	104.3	88.38	92.5367	1.53	0.99	1.2	0.97	1.1	1.36	1.14333	1.24	-0.139447	0.613484	0.93206
105246306	'Gm41609'	lncRNA	0.02	0.06	0.01	0.02	0.02	0.04	0.0266667	0.03	2	5	1.01	2	2	2.94	2.31333	2.67	0.02	0.05	0.01	0.02	0.02	0.03	0.0233333	0.0266667	0.199847	0.876382	0.961696
105246309	'Gm41611'	lncRNA	0	0.09	0	0.06	0.06	0.03	0.05	0.03	0	3	0	2	2	1	1.66667	1	0	0.07	0	0.05	0.05	0.02	0.04	0.0233333	-0.959079	0.615586	0.933592
105246339	'Gm41640'	lncRNA	0.02	0.21	0.01	0.01	0.2	0.01	0.0733333	0.08	1.97	3	1	1	4	1	2	1.99	0.01	0.16	0.01	0.01	0.15	0.01	0.0566667	0.06	-0.451787	0.757766	0.952328
105246427	'Gm41717'	lncRNA
105246441	'4933434P08Rik'	lncRNA
105246501	'A330094K24Rik'	lncRNA
105246506	'Rbfaos'	lncRNA
105246710	'Gm19497'	lncRNA	0.1	0.31	0	0.05	0.14	0	0.0633333	0.136667	2	3	0	2	4	0	2	1.66667	0.08	0.25	0	0.04	0.1	0	0.0466667	0.11	-0.443011	0.797613	0.952328
105246756	'Gm41998'	lncRNA
105246757	'Gm41999'	lncRNA	9.62	7.35	6.7	2.53	5.1	1.53	3.05333	7.89	49	34	30	14	26	8	16	37.6667	7.9	5.8	5.21	2.07	3.9	1.18	2.38333	6.30333	1.04401	0.0382707	0.161957
105246766	'Gm13822'	lncRNA	0.3	0.44	0.1	0	0.3	0.64	0.313333	0.28	1	2	1	0	1	3	1.33333	1.33333	0.25	0.35	0.08	0	0.23	0.5	0.243333	0.226667	-0.210394	0.9041	0.974274
105246782	'Gm42020'	lncRNA	0.26	0.17	0.06	0.15	0.19	0	0.113333	0.163333	9	6	2	5	7	0	4	5.66667	0.21	0.13	0.04	0.12	0.14	0	0.0866667	0.126667	0.31783	0.783893	0.952328
105246843	'Gm42064'	lncRNA
105246846	'Gm42067'	lncRNA	2.5	2.83	3.43	1.92	2.67	2.18	2.25667	2.92	60	54	65	67	54	71	64	59.6667	2.05	2.23	2.67	1.56	2.04	1.68	1.76	2.31667	-0.320964	0.251861	0.60129
105246959	'Gm42151'	lncRNA	0.57	0.42	0.42	0.1	0.18	0.2	0.16	0.47	55	39	38	10	17	18	15	44	0.47	0.33	0.33	0.08	0.14	0.15	0.123333	0.376667	1.34959	0.00168999	0.0137343
105246973	'4833439F03Rik'	lncRNA	2.58	4	2.65	4.11	5.44	3.94	4.49667	3.07667	163	224	156	266	303	179	249.333	181	2.12	3.15	2.06	3.36	4.16	3.04	3.52	2.44333	-0.672854	0.0055121	0.0359223
105247126	'Gm16731'	lncRNA	1.75	1.26	0.82	0.23	0.71	0.25	0.396667	1.27667	50	32	22	6	19	7	10.6667	34.6667	1.44	0.99	0.64	0.19	0.54	0.19	0.306667	1.02333	1.52029	0.00963877	0.0560517
105247140	'Gm11210'	lncRNA	0.37	0.21	0	0.17	0	0	0.0566667	0.193333	2	1	0	1	0	0	0.333333	1	0.31	0.16	0	0.14	0	0	0.0466667	0.156667	1.2896	0.633383	0.945198
105247161	'Gm12415'	lncRNA
105247176	'Gm42321'	lncRNA
105247182	'Gm12974'	lncRNA	0.55	0.25	0.44	0.47	0.11	0.19	0.256667	0.413333	12	6.67	4.82	7.6	3.09	5.26	5.31667	7.83	0.46	0.19	0.34	0.38	0.09	0.15	0.206667	0.33	0.336406	0.69683	0.952328
105247221	'Gm42356'	lncRNA
105247277	'Gm2309'	lncRNA
105364	'AW495222'	lncRNA	0.11	0.12	0.07	0.65	0.47	0.69	0.603333	0.1	2	2	2	7	4	7	6	2	0.09	0.1	0.05	0.53	0.36	0.53	0.473333	0.08	-1.81056	0.0745038	0.265176
105404	'BB123696'	lncRNA	0.35	1.15	1.71	4.15	0.33	0.86	1.78	1.07	8	21	42	109	9	26	48	23.6667	0.29	0.91	1.33	3.39	0.25	0.67	1.43667	0.843333	-1.30343	0.11127	0.350282
105463053	'Bloodlinc'	lncRNA	0.25	1.39	0.09	0.55	1.35	0.19	0.696667	0.576667	7	11	3	7	19	7	11	7	0.21	1.09	0.07	0.45	1.03	0.15	0.543333	0.456667	-0.839131	0.280141	0.640515
105463124	'Gm45924'	lncRNA
105500046	'Gm30731'	lncRNA
105661730	'Lincmd1'	lncRNA
105734734	'Gm11715'	lncRNA	0	0.08	0	0	0	0	0	0.0266667	0	1	0	0	0	0	0	0.333333	0	0.06	0	0	0	0	0	0.02	0.747384	0.854672	0.952328
105975	'AU022754'	lncRNA	0.01	0	0.09	0.01	0.09	0.02	0.04	0.0333333	1	0	3	1	1	2	1.33333	1.33333	0.01	0	0.07	0.01	0.07	0.02	0.0333333	0.0266667	-0.226859	0.896614	0.971694
105976	'AU022793'	lncRNA	0.15	0	0.43	0	0	0	0	0.193333	2	0	6	0	0	0	0	2.66667	0.12	0	0.33	0	0	0	0	0.15	3.63065	0.159355	0.44639
105980075	'Gm20716'	lncRNA	18.85	23.13	23.58	19.61	22.22	22.73	21.52	21.8533	2324.78	2711.08	2779.91	2498.83	2591.8	2759.5	2616.71	2605.26	15.48	18.24	18.34	16	17	17.57	16.8567	17.3533	-0.22383	0.0396348	0.166434
106007488	'Hotairm2'	lncRNA	0.14	0	0.07	0	18.18	0	6.06	0.07	3.34	0	1.5	0	1	0	0.333333	1.61333	0.11	0	0.05	0	13.91	0	4.63667	0.0533333	1.70563	0.50878	0.874161
106014251	'Gm28043'	lncRNA	2.87	4.34	3.91	3.19	5.46	2.7	3.78333	3.70667	131.17	149.93	131.89	140.18	135.9	126.09	134.057	137.663	2.35	3.42	3.04	2.6	4.17	2.09	2.95333	2.93667	-0.180191	0.348924	0.722544
106059	'A430088P11Rik'	lncRNA	0.02	0.01	0.03	0.05	0.04	0.01	0.0333333	0.02	1.39	0.97	2.09	4	3	1	2.66667	1.48333	0.02	0.01	0.02	0.04	0.03	0.01	0.0266667	0.0166667	-1.63773	0.2952	0.662108
106557447	'Gm49890'	lncRNA	2.13	1.68	1.3	0.33	1	0.78	0.703333	1.70333	48	35	28	8	21	19	16	37	1.75	1.33	1.01	0.27	0.76	0.6	0.543333	1.36333	1.01517	0.0354481	0.152922
107003	'A330093E20Rik'	lncRNA	0	0.25	0.26	0.05	0	0.04	0.03	0.17	0	2	2	3	0	2	1.66667	1.33333	0	0.2	0.2	0.04	0	0.03	0.0233333	0.133333	-0.59128	0.744107	0.952328
107350	'AW112010'	lncRNA	68.67	82.11	87.82	36.63	42.62	33.12	37.4567	79.5333	759	849	882	425	463	362	416.667	830	56.41	64.74	68.29	29.89	32.6	25.6	29.3633	63.1467	0.779974	4.64312e-09	1.99564e-07
107376	'E330013P04Rik'	lncRNA
108167326	'Gm2788'	lncRNA	3.7	5.46	10.52	10.98	10.43	17.23	12.88	6.56	631.23	891.26	1674.63	1909.37	1720.39	2805.73	2145.16	1065.71	3.04	4.3	8.18	8.96	7.98	13.32	10.0867	5.17333	-1.24255	0.00817805	0.049294
108167440	'AU020206'	lncRNA	2.58	4.14	5.49	2.12	2.41	2.45	2.32667	4.07	246	378	504	215	213	232	220	376	2.12	3.27	4.27	1.73	1.84	1.89	1.82	3.22	0.548035	0.0248208	0.11655
108167511	'9130015G15Rik'	lncRNA
108167541	'Gm46046'	lncRNA	0	0.46	0	0	0	0	0	0.153333	0	1	0	0	0	0	0	0.333333	0	0.36	0	0	0	0	0	0.12	0.747384	0.854672	0.952328
108167546	'Gm30606'	lncRNA
108167550	'Gm38250'	lncRNA	0.89	1.46	1.31	0.64	0.57	0.55	0.586667	1.22	12	12	13	7	7	6	6.66667	12.3333	0.73	1.15	1.02	0.52	0.43	0.43	0.46	0.966667	0.67297	0.288299	0.652505
108167617	'Gm26788'	lncRNA	0.05	0.01	0.05	0.03	0.01	0	0.0133333	0.0366667	3	1	2	2	1	0	1	2	0.04	0.01	0.04	0.03	0.01	0	0.0133333	0.03	0.782923	0.638688	0.948123
108167623	'Gm46091'	lncRNA	0	0	0	0	0	0.01	0.00333333	0	0	0	0	0	0	1	0.333333	0	0	0	0	0	0	0.01	0.00333333	0	-1.17617	0.773161	0.952328
108167651	'Gm46111'	lncRNA
108167690	'Gm26797'	lncRNA	0.11	0.52	0.08	0.11	0.03	0.08	0.0733333	0.236667	9	10	6	3	2	7	4	8.33333	0.09	0.41	0.06	0.09	0.02	0.06	0.0566667	0.186667	0.839795	0.328505	0.700885
108167726	'Gm37120'	lncRNA	0.01	0	0	0	0	0	0	0.00333333	2	0	0	0	0	0	0	0.666667	0.01	0	0	0	0	0	0	0.00333333	1.68744	0.675716	0.952328
108167736	'LOC108167736'	lncRNA	0.53	0.26	0.63	0.22	0.11	0.41	0.246667	0.473333	16	12.66	18	6.97	8.01	8	7.66	15.5533	0.43	0.21	0.49	0.18	0.08	0.32	0.193333	0.376667	0.853187	0.156066	0.440835
108167883	'Gm46270'	lncRNA	0.33	0.2	0.26	0.18	0.29	0.39	0.286667	0.263333	7	4	5	4	6	8	6	5.33333	0.27	0.16	0.2	0.15	0.22	0.3	0.223333	0.21	-0.376025	0.647549	0.952328
108167886	'Gm46272'	lncRNA	0.25	0.28	0.3	0.23	0.41	0.41	0.35	0.276667	15	15	15	12	21	19	17.3333	15	0.21	0.22	0.23	0.19	0.32	0.32	0.276667	0.22	-0.414566	0.401449	0.782175
108167906	'Ccdc42os'	lncRNA
108167931	'Gm11650'	lncRNA
108168154	'Gm9732'	lncRNA	0	0	0.04	0	0	0	0	0.0133333	0	0	1	0	0	0	0	0.333333	0	0	0.03	0	0	0	0	0.01	0.747384	0.854672	0.952328
108168167	'Gm46458'	lncRNA
108168278	'Gm46545'	lncRNA	0	3.15	0	0	0.79	0	0.263333	1.05	0	3	0	0	1	0	0.333333	1	0	2.48	0	0	0.6	0	0.2	0.826667	1.25407	0.701247	0.952328
108168307	'Gm46567'	lncRNA	0	0	0.02	0	0	0	0	0.00666667	0	0	1	0	0	0	0	0.333333	0	0	0.02	0	0	0	0	0.00666667	0.747384	0.854672	0.952328
108168350	'Gm27217'	lncRNA
108168359	'Gm46609'	lncRNA	0.02	0.01	0.03	0	0	0	0	0.02	1	1	2	0	0	0	0	1.33333	0.02	0.01	0.02	0	0	0	0	0.0166667	2.63612	0.32033	0.691356
108168397	'Gm46637'	lncRNA
108168459	'Gm2101'	lncRNA
108168725	'Gm13351'	lncRNA	0	0	0	0	0.57	0.19	0.253333	0	0	0	0	0	2.93	1	1.31	0	0	0	0	0	0.44	0.15	0.196667	0	-2.61089	0.435968	0.810978
108168739	'Gm13291'	lncRNA
108168741	'Gm46732'	lncRNA	0.38	0.86	1.26	0.7	0.86	0.81	0.79	0.833333	14.48	30.97	43.93	27.11	31.47	29.24	29.2733	29.7933	0.32	0.68	0.98	0.57	0.66	0.62	0.616667	0.66	-0.223497	0.624825	0.938576
108168742	'Gm13427'	lncRNA	0.45	0.54	0.3	0.13	0.69	0.11	0.31	0.43	12	10	5	4	15	2	7	9	0.37	0.42	0.23	0.11	0.53	0.09	0.243333	0.34	0.192263	0.827308	0.952328
108168745	'Gm35202'	lncRNA
108168747	'Gm46735'	lncRNA	1.11	0.48	0.37	0.16	0.17	1.04	0.456667	0.653333	20	13	11	5	5	14	8	14.6667	0.91	0.38	0.28	0.13	0.13	0.81	0.356667	0.523333	0.663474	0.335782	0.709226
108168754	'Gm13522'	lncRNA	8.78	3.2	3.26	2.63	3.43	20.43	8.83	5.08	55	28	19	19	17	30	22	34	7.21	2.53	2.54	2.15	2.63	15.8	6.86	4.09333	0.423024	0.421871	0.798911
108168785	'G630016G05Rik'	lncRNA	0.2	0.31	0.38	0.21	0.16	0.2	0.19	0.296667	15	25	28	18	13	15	15.3333	22.6667	0.17	0.24	0.29	0.17	0.13	0.15	0.15	0.233333	0.337172	0.489104	0.858945
108168793	'Gm46764'	lncRNA	0.75	1.67	1.08	0.47	1.09	0.75	0.77	1.16667	12	24	13	7	13	9	9.66667	16.3333	0.61	1.32	0.84	0.39	0.83	0.58	0.6	0.923333	0.54985	0.357881	0.733121
108168895	'Gm43568'	lncRNA	0.33	1	0.12	0.59	0.15	1.05	0.596667	0.483333	3	5	1	3	1	6	3.33333	3	0.27	0.79	0.09	0.48	0.11	0.81	0.466667	0.383333	-0.379456	0.75127	0.952328
108168904	'Gm43403'	lncRNA	0.09	0.02	0.07	0.07	0.12	0.02	0.07	0.06	4	1	3	3	5	1	3	2.66667	0.07	0.02	0.06	0.05	0.09	0.02	0.0533333	0.05	-0.36237	0.764803	0.952328
108168923	'Gm46840'	lncRNA	2.59	3.13	4.25	3.14	3.09	2.34	2.85667	3.32333	118.59	116.38	148.23	83.52	98.79	87.28	89.8633	127.733	2.13	2.47	3.31	2.56	2.37	1.81	2.24667	2.63667	0.297778	0.163497	0.453498
108168974	'Gm12841'	lncRNA	0	0.1	0.06	0.03	0.07	0.02	0.04	0.0533333	0	8.99	6	4.01	6.69	2.38	4.36	4.99667	0	0.08	0.04	0.03	0.05	0.02	0.0333333	0.04	0.00189502	0.998719	0.999576
108168987	'Gm13205'	lncRNA	0.76	0	0.42	0.71	0.25	0.43	0.463333	0.393333	7	0	3	6	2	4	4	3.33333	0.62	0	0.33	0.58	0.19	0.33	0.366667	0.316667	-0.48056	0.699297	0.952328
108169008	'Gm46891'	lncRNA	1.47	1.45	1.5	0.89	0.74	1.23	0.953333	1.47333	67	58	55	41	47	52	46.6667	60	1.21	1.14	1.16	0.73	0.57	0.95	0.75	1.17	0.151811	0.599826	0.926414
108169039	'Gm15522'	lncRNA
108169125	'Gm46947'	lncRNA
108809	'4933407E24Rik'	lncRNA
108871	'4930447M23Rik'	lncRNA	0	0.06	0	0	0	0	0	0.02	0	2	0	0	0	0	0	0.666667	0	0.04	0	0	0	0	0	0.0133333	1.63075	0.686389	0.952328
108970	'4930519F24Rik'	lncRNA
109198	'6030407O03Rik'	lncRNA	0.19	0.15	0.1	0	0	0	0	0.146667	4	3	2	0	0	0	0	3	0.16	0.12	0.08	0	0	0	0	0.12	3.82167	0.0567332	0.216865
109202	'A930024E05Rik'	lncRNA	0.66	0.62	0.57	0.26	0.42	0.32	0.333333	0.616667	29	33	30	14	21	17	17.3333	30.6667	0.55	0.49	0.45	0.21	0.32	0.25	0.26	0.496667	0.6143	0.135184	0.400577
109215	'Lncbate1'	lncRNA	2.27	2.55	1.53	2.77	3.1	2.95	2.94	2.11667	37.09	30.23	20.32	37.7	40.44	47.46	41.8667	29.2133	1.87	2.01	1.19	2.26	2.37	2.28	2.30333	1.69	-0.719965	0.0580379	0.220783
109280	'Slc22a13b'	lncRNA
109335	'9230102K24Rik'	lncRNA
109344	'E130215H24Rik'	lncRNA	0	0	0	0	0	0.1	0.0333333	0	0	0	0	0	0	2	0.666667	0	0	0	0	0	0	0.08	0.0266667	0	-2.08657	0.605214	0.926559
110333	'Rmst'	lncRNA	0	0	0	0.01	0.02	0	0.01	0	0	0	0	1	1	0	0.666667	0	0	0	0	0.01	0.01	0	0.00666667	0	-2.06659	0.589303	0.923935
111002	'Marcksl1-ps4'	lncRNA	4.83	5.95	4.84	1.53	3.15	1.85	2.17667	5.20667	457	538	427	148	289	167	201.333	474	3.97	4.69	3.76	1.25	2.41	1.43	1.69667	4.14	1.03788	9.55518e-06	0.000172045
111975	'Igf2os'	lncRNA	0.01	0	0.01	0.02	0.02	0.01	0.0166667	0.00666667	1	0	1	3	3	1	2.33333	0.666667	0.01	0	0.01	0.02	0.02	0.01	0.0166667	0.00666667	-2.01608	0.239002	0.580642
114668	'5033404E19Rik'	lncRNA
114673	'4930433N12Rik'	lncRNA	0.16	0.37	0.29	0.5	1.06	0.38	0.646667	0.273333	4	9	3.08	5	10	5	6.66667	5.36	0.13	0.29	0.22	0.4	0.81	0.29	0.5	0.213333	-0.522689	0.53899	0.889613
115486438	'LOC115486438'	lncRNA
115486483	'Gm14372'	lncRNA
115486509	'Gm12764'	lncRNA	1.58	1.47	1.51	1.69	2.03	1.34	1.68667	1.52	109	110	99	137	125	100	120.667	106	1.3	1.16	1.18	1.38	1.56	1.04	1.32667	1.21333	-0.402178	0.0750584	0.266581
115486514	'D530033B14Rik'	lncRNA	0	0.12	0	0	0	0	0	0.04	0	1	0	0	0	0	0	0.333333	0	0.1	0	0	0	0	0	0.0333333	0.747384	0.854672	0.952328
115486552	'Gm51502'	lncRNA
115486886	'Gm27011'	lncRNA	0.06	0	0	0.06	0	0	0.02	0.02	1	0	0	1	0	0	0.333333	0.333333	0.05	0	0	0.05	0	0	0.0166667	0.0166667	-0.214388	0.956135	0.975955
115486954	'Gm15889'	lncRNA	23.47	24.77	19.52	4.98	9.44	6.04	6.82	22.5867	662	614	530	230	244	142	205.333	602	19.28	19.53	15.18	4.07	7.22	4.67	5.32	17.9967	1.34323	1.24559e-09	6.04601e-08
115487084	'LOC115487084'	lncRNA
115487091	'1700126A01Rik'	lncRNA
115487098	'Gm51630'	lncRNA
115487119	'6030442K20Rik'	lncRNA	0.75	0.73	0.6	0.69	0.85	0.52	0.686667	0.693333	30	28	22	28	33	20	27	26.6667	0.62	0.57	0.46	0.56	0.65	0.4	0.536667	0.55	-0.225138	0.579065	0.919687
115487162	'1700023A20Rik'	lncRNA
115487215	'Gm7628'	lncRNA	0.08	0.23	0.22	0.26	0.23	0.44	0.31	0.176667	4	11	10	13	11	21	15	8.33333	0.07	0.18	0.17	0.21	0.17	0.34	0.24	0.14	-1.07623	0.0956607	0.315101
115487218	'BC049987'	lncRNA	24.94	17.12	15.35	18.66	20.07	16.16	18.2967	19.1367	678	446	386	526.99	534	427	495.997	503.333	20.49	13.5	11.93	15.23	15.35	12.49	14.3567	15.3067	-0.183009	0.443085	0.817568
115487348	'A430027H14Rik'	lncRNA	0	0.03	0	0	0	0	0	0.01	0	1	0	0	0	0	0	0.333333	0	0.02	0	0	0	0	0	0.00666667	0.747384	0.854672	0.952328
115487379	'Gm16254'	lncRNA
115487453	'Gm51802'	lncRNA	0.2	0.26	0.36	0.37	0.26	0.26	0.296667	0.273333	4.74	6	8	7	6	6	6.33333	6.24667	0.16	0.21	0.28	0.3	0.2	0.2	0.233333	0.216667	-0.301117	0.698464	0.952328
115487469	'4930555G07Rik'	lncRNA
115487470	'Gm16271'	lncRNA
115487472	'Gm51814'	lncRNA	0	0	0	0	0.03	0	0.01	0	0	0	0	0	1	0	0.333333	0	0	0	0	0	0.03	0	0.01	0	-1.17617	0.773161	0.952328
115487731	'Gm12299'	lncRNA
115487737	'Gm51871'	lncRNA	0.31	0.41	0.51	0.59	0.63	0.78	0.666667	0.41	4	5	6	8	8	10	8.66667	5	0.25	0.32	0.39	0.48	0.48	0.61	0.523333	0.32	-1.01239	0.171273	0.46787
115487829	'Gm17586'	lncRNA	4.2	3.44	2.28	1.67	2.1	1.45	1.74	3.30667	80	62	40	33	39	27	33	60.6667	3.45	2.71	1.77	1.36	1.6	1.12	1.36	2.64333	0.676055	0.0748687	0.266156
115488122	'Gm36445'	lncRNA	1.69	2.42	2.33	1.6	3.02	2.57	2.39667	2.14667	128.59	145.19	162.1	115.65	188.99	160.82	155.153	145.293	1.38	1.91	1.81	1.31	2.31	1.99	1.87	1.7	-0.29771	0.166816	0.459559
115488138	'Gm15912'	lncRNA	0.35	0.64	0.83	0.28	0.33	0.57	0.393333	0.606667	6	11	16	8	8.78	11.01	9.26333	11	0.29	0.5	0.65	0.23	0.25	0.44	0.306667	0.48	0.0644321	0.922107	0.975955
115488304	'5830448L01Rik'	lncRNA	1.66	2.31	2.66	1.68	2.26	1.96	1.96667	2.21	50	66	74	52	66	57	58.3333	63.3333	1.37	1.82	2.07	1.37	1.73	1.52	1.54	1.75333	-0.0956446	0.728088	0.952328
115488623	'6720473M11Rik'	lncRNA	0.13	0.09	0.18	0.04	0.13	0.04	0.07	0.133333	3	2	4	1	3	1	1.66667	3	0.11	0.07	0.14	0.03	0.1	0.03	0.0533333	0.106667	0.651527	0.612649	0.931854
115488653	'Gm16139'	lncRNA	0	0.21	0	0	0	0	0	0.07	0	1	0	0	0	0	0	0.333333	0	0.16	0	0	0	0	0	0.0533333	0.747384	0.854672	0.952328
115488784	'Gm5817'	lncRNA	4.31	4.38	4.35	2.06	2.98	2.41	2.48333	4.34667	161	149	137	73.95	115	81	89.9833	149	3.54	3.45	3.38	1.68	2.28	1.86	1.94	3.45667	0.52948	0.0212078	0.103487
115488893	'Gm18280'	lncRNA
115488895	'Gm26533'	lncRNA	0.03	0.07	0	0	0.03	0.03	0.02	0.0333333	1	2	0	0	1	1	0.666667	1	0.03	0.05	0	0	0.02	0.03	0.0166667	0.0266667	0.398006	0.860118	0.955056
115488897	'Gm52329'	lncRNA	1.33	0.94	0.4	0.36	0.19	0.14	0.23	0.89	22	16	7	9	4	2	5	15	1.09	0.74	0.31	0.29	0.15	0.1	0.18	0.713333	1.36821	0.0913293	0.30502
115488899	'6330525I24Rik'	lncRNA
115488900	'5730552O08Rik'	lncRNA	0	0	0	0	0.04	0	0.0133333	0	0	0	0	0	0.99	0	0.33	0	0	0	0	0	0.03	0	0.01	0
115488923	'C330008A17Rik'	lncRNA
115489003	'Gm50340'	lncRNA	1.01	1.08	1.37	0.06	0.5	1.28	0.613333	1.15333	16	13	20	1	3	14	6	16.3333	0.83	0.85	1.07	0.05	0.39	0.99	0.476667	0.916667	1.22721	0.146582	0.423049
115489035	'Gm50341'	lncRNA	0	0	0.01	0	0	0	0	0.00333333	0	0	1	0	0	0	0	0.333333	0	0	0.01	0	0	0	0	0.00333333	0.747384	0.854672	0.952328
115489123	'Gm53059'	lncRNA	0	0.11	0	0	0	0	0	0.0366667	0	1	0	0	0	0	0	0.333333	0	0.09	0	0	0	0	0	0.03	0.747384	0.854672	0.952328
115489151	'Gm52456'	lncRNA	0.06	0	0.06	0	0	0	0	0.04	1	0	1	0	0	0	0	0.666667	0.05	0	0.05	0	0	0	0	0.0333333	1.65007	0.681532	0.952328
115489452	'A430018G15Rik'	lncRNA	2.17	1.58	1.69	0.71	1	0.96	0.89	1.81333	114	83	85	43	56	53	50.6667	94	1.78	1.24	1.31	0.58	0.77	0.74	0.696667	1.44333	0.685617	0.0138277	0.0746793
115489455	'Gm52513'	lncRNA
115489488	'LOC115489488'	lncRNA	1.32	2.01	1.81	0.57	0.51	0.79	0.623333	1.71333	45	65	57	20	17	26	21	55.6667	1.09	1.58	1.41	0.47	0.39	0.61	0.49	1.36	1.18531	0.0012713	0.010827
115489522	'D930003E18Rik'	lncRNA	0.26	0.12	0.12	0.22	0.27	0.19	0.226667	0.166667	9	4	3	7	7	6	6.66667	5.33333	0.21	0.09	0.09	0.18	0.2	0.15	0.176667	0.13	-0.524707	0.527085	0.882131
115489528	'Gm52562'	lncRNA	0.13	0.15	0.12	0.11	0.1	0.07	0.0933333	0.133333	9	10	8	8	7	5	6.66667	9	0.11	0.12	0.1	0.09	0.08	0.06	0.0766667	0.11	0.217772	0.753603	0.952328
115489687	'Gm16016'	lncRNA	1.45	1.31	1.1	1.24	1	1.07	1.10333	1.28667	72	62	51	63	48	51	54	61.6667	1.19	1.03	0.86	1.01	0.76	0.83	0.866667	1.02667	-0.0247821	0.935474	0.975955
115489693	'6430573P05Rik'	lncRNA	0.44	0	0	0.81	0.22	0.43	0.486667	0.146667	2	0	0	4	1	2	2.33333	0.666667	0.36	0	0	0.66	0.17	0.33	0.386667	0.12	-2.02298	0.277878	0.637418
115489697	'Gm43464'	lncRNA	0.1	0.05	0.1	0.05	0.08	0.02	0.05	0.0833333	9	6	9	6	4	2	4	8	0.08	0.04	0.08	0.04	0.06	0.01	0.0366667	0.0666667	0.781623	0.352987	0.727656
115489912	'Gm9867'	lncRNA
115489941	'Gm12867'	lncRNA	0	0.19	0	0.15	0	0	0.05	0.0633333	0	1	0	1	0	0	0.333333	0.333333	0	0.15	0	0.12	0	0	0.04	0.05	-0.214388	0.956441	0.975955
115489947	'LOC115489947'	lncRNA	0.04	0.05	0.02	0.03	0	0	0.01	0.0366667	2.73	3	1	2	0	0	0.666667	2.24333	0.03	0.04	0.01	0.02	0	0	0.00666667	0.0266667	1.33438	0.491976	0.861548
115489985	'Gm12446'	lncRNA
115490136	'Gm15860'	lncRNA	0.37	0.44	0.28	0.47	0.25	0.12	0.28	0.363333	6	5	4	8	4	2	4.66667	5	0.3	0.35	0.22	0.38	0.19	0.1	0.223333	0.29	-0.123536	0.894473	0.970808
115490137	'LOC115490137'	lncRNA	5.07	4.1	2.37	2.76	3.65	3.73	3.38	3.84667	595.58	461.97	264.75	329.57	422.78	382.86	378.403	440.767	4.16	3.23	1.85	2.25	2.79	2.89	2.64333	3.08	0.0213748	0.938824	0.975955
115490183	'Gm16015'	lncRNA
115490207	'Gm13842'	lncRNA
115490342	'6530409C15Rik'	lncRNA	2.94	3.49	3.41	1.72	2.65	2.34	2.23667	3.28	301	343.28	317	179	263	221	221	320.427	2.42	2.75	2.65	1.4	2.02	1.81	1.74333	2.60667	0.327543	0.0482994	0.192166
115490372	'Gm52877'	lncRNA	0.29	0.58	0.79	0.13	0.25	0.42	0.266667	0.553333	13	25	33	6	11	18	11.6667	23.6667	0.24	0.46	0.62	0.11	0.19	0.32	0.206667	0.44	0.800392	0.178142	0.480382
115490389	'Gm52885'	lncRNA	0	0	0	0	0.05	0.06	0.0366667	0	0	0	0	0	1	1	0.666667	0	0	0	0	0	0.04	0.04	0.0266667	0	-2.04168	0.596122	0.923935
115490402	'1700095J07Rik'	lncRNA	0	0	0	0	0.06	0	0.02	0	0	0	0	0	1	0	0.333333	0	0	0	0	0	0.05	0	0.0166667	0	-1.17617	0.773161	0.952328
116707477	'Ipo11-lrrc70'	lncRNA	0	0	0	0.02	0	0	0.00666667	0	0	0	0	1	0	0	0.333333	0	0	0	0	0.02	0	0	0.00666667	0	-1.17617	0.773161	0.952328
116811	'Zim3'	lncRNA
117903913	'Gm41043'	lncRNA
117962243	'1700025O08Rik'	lncRNA
117997401	'Gm53055'	lncRNA	0	0.15	0	0.13	0.14	0.14	0.136667	0.05	0	1.01	0	1.01	1.01	1.01	1.01	0.336667	0	0.12	0	0.1	0.11	0.11	0.106667	0.04	-1.69595	0.472362	0.842553
117997402	'Cox7c-ps1'	lncRNA	6.77	5.33	5.51	5.69	11.19	9.57	8.81667	5.87	27	19	19	25	45	40	36.6667	21.6667	5.56	4.2	4.28	4.65	8.56	7.4	6.87	4.68	-0.959409	0.0192648	0.0961543
117997403	'LOC117997403'	lncRNA	7.03	6.55	3.19	1.76	2.28	1.96	2	5.59	122	122	67	56	52	40	49.3333	103.667	5.77	5.16	2.48	1.44	1.74	1.51	1.56333	4.47	0.861487	0.00975396	0.0565666
118027456	'LOC118027456'	lncRNA	0	0.02	0	0	0	0	0	0.00666667	0	1	0	0	0	0	0	0.333333	0	0.01	0	0	0	0	0	0.00333333	0.747384	0.854672	0.952328
118027462	'Gm53058'	lncRNA
118126071	'Gm53065'	lncRNA	0.43	0.52	0.29	0.55	0.32	0.33	0.4	0.413333	9	11	10	15	13	12	13.3333	10	0.35	0.41	0.23	0.45	0.24	0.26	0.316667	0.33	-0.633239	0.262942	0.616315
12270	'C4bp-ps1'	lncRNA	0.7	0.29	0.42	0.6	0.24	0.36	0.4	0.47	18	7	10	16	6	9	10.3333	11.6667	0.57	0.22	0.33	0.49	0.18	0.28	0.316667	0.373333	-0.0483655	0.944949	0.975955
13924	'Ptprv'	lncRNA	0	0.28	0	0	0.09	0.07	0.0533333	0.0933333	0	3	0	0	1	2	1	1	0	0.22	0	0	0.07	0.06	0.0433333	0.0733333	-0.211581	0.930638	0.975955
13996	'Etohd2'	lncRNA	1.57	2.13	2.09	0.97	1.39	1.32	1.22667	1.93	89	84	66.98	54	77	68	66.3333	79.9933	1.29	1.68	1.62	0.79	1.07	1.02	0.96	1.53	0.0588204	0.826292	0.952328
14455	'Gas5'	lncRNA	64.32	69.43	83.56	66.12	69.23	74.01	69.7867	72.4367	1098	1228	1352	1353	1305	1431	1363	1226	52.84	54.74	64.98	53.96	52.96	57.22	54.7133	57.52	-0.372191	0.00257996	0.0193937
14910	'Gt(ROSA)26Sor'	lncRNA	3.83	5.53	6.23	7.15	8.59	8.85	8.19667	5.19667	84	105	140	154	173	182	169.667	109.667	3.15	4.36	4.84	5.83	6.57	6.84	6.41333	4.11667	-0.848116	0.000172034	0.00203298
14955	'H19'	lncRNA	0.16	0.52	4.58	0.52	0.09	0.12	0.243333	1.75333	5	23	169	7	2	2	3.66667	65.6667	0.13	0.41	3.56	0.43	0.07	0.09	0.196667	1.36667	3.889	0.00590966	0.0379929
15397	'Hoxa11os'	lncRNA
16631	'Klra13-ps'	lncRNA	0	0.07	0	0	0.06	0	0.02	0.0233333	0	1	0	0	1	0	0.333333	0.333333	0	0.05	0	0	0.05	0	0.0166667	0.0166667	-0.214388	0.957338	0.975955
17263	'Meg3'	lncRNA	0.93	2.09	1.5	2.15	1.5	2.72	2.12333	1.50667	20	26	36	69	36	73	59.3333	27.3333	0.76	1.65	1.16	1.75	1.14	2.11	1.66667	1.19	-1.35363	0.00116045	0.0100012
17835	'Mug-ps1'	lncRNA	0.68	0.31	0.82	0	0	0.12	0.04	0.603333	8.96	3.88	9.92	0	0	1.53	0.51	7.58667	0.56	0.25	0.64	0	0	0.09	0.03	0.483333	4.00535	0.0115002	0.0643817
17857	'Mx1'	lncRNA	0.45	0.73	0.57	0.27	0.4	0.16	0.276667	0.583333	41	64	49	25	36	14	25	51.3333	0.37	0.57	0.45	0.22	0.31	0.12	0.216667	0.463333	0.830633	0.0433958	0.177609
19296	'Pvt1'	lncRNA	6.09	11.9	10.7	8.71	9.31	29.85	15.9567	9.56333	328.61	429.2	617.06	407.21	358.99	695.12	487.107	458.29	5.01	9.38	8.32	7.11	7.12	23.08	12.4367	7.57	-0.317126	0.28138	0.64241
193022	'Gm53'	lncRNA
193217	'BC018473'	lncRNA	0	0	0.01	0	0	0.04	0.0133333	0.00333333	0	0	1	0	0	1	0.333333	0.333333	0	0	0.01	0	0	0.03	0.01	0.00333333	-0.214388	0.95686	0.975955
193280	'C030037D09Rik'	lncRNA	2.5	1.47	1.8	1.59	1.72	2.5	1.93667	1.92333	57	60	64	68.49	58.31	56.02	60.94	60.3333	2.05	1.16	1.4	1.29	1.31	1.94	1.51333	1.53667	-0.226488	0.400873	0.78151
194292	'Gm5'	lncRNA
207157	'Gm9871'	lncRNA
20738	'Spn-ps'	lncRNA
208079	'A530053G22Rik'	lncRNA
211039	'BC016548'	lncRNA	0	0	0.04	0	0.04	0	0.0133333	0.0133333	0	0	1	0	1	0	0.333333	0.333333	0	0	0.03	0	0.03	0	0.01	0.01	-0.214388	0.957442	0.975955
211496	'4932415M13Rik'	lncRNA
212965	'BC024386'	lncRNA	205.81	178.34	135.91	54.12	107.88	61.48	74.4933	173.353	6906	5731	4267	1687	3447	1943	2359	5634.67	169.06	140.61	105.68	44.17	82.52	47.53	58.0733	138.45	1.06869	3.01749e-05	0.000460803
213742	'Xist'	lncRNA	0.19	0.16	0.08	0.03	0.25	0.1	0.126667	0.143333	13.78	22.82	15.83	11	35	14.37	20.1233	17.4767	0.15	0.13	0.06	0.03	0.19	0.08	0.1	0.113333	-0.453829	0.427696	0.804436
21378	'Tbrg3'	lncRNA	1.59	1.83	1.89	1.62	1.59	2.12	1.77667	1.77	186.95	206.28	207.76	194.05	181.07	237.92	204.347	200.33	1.31	1.45	1.47	1.32	1.22	1.64	1.39333	1.41	-0.249843	0.183156	0.489593
213811	'BC002059'	lncRNA	14.8	14.92	16.86	10.13	11.13	10.34	10.5333	15.5267	832.5	827.32	887.2	676.65	713.56	640.82	677.01	849.007	12.16	11.76	13.11	8.27	8.51	7.99	8.25667	12.3433	0.113311	0.300735	0.669282
215458	'Gm43915'	lncRNA	2.32	2.97	3.08	3.27	4.49	4.43	4.06333	2.79	219	268	271	315	410	400	375	252.667	1.91	2.34	2.39	2.67	3.43	3.42	3.17333	2.21333	-0.782207	7.45671e-07	1.86404e-05
215714	'Gm4793'	lncRNA	0.01	0.02	0	0.03	0.02	0.02	0.0233333	0.01	1	1	0	2	1	1	1.33333	0.666667	0.01	0.01	0	0.02	0.01	0.01	0.0133333	0.00666667	-1.21802	0.526307	0.881461
216377	'Gm38403'	lncRNA
217294	'BC006965'	lncRNA	0.13	0.13	0.07	0.08	0.03	0	0.0366667	0.11	4	2	2	1	1	0	0.666667	2.66667	0.11	0.1	0.06	0.07	0.03	0	0.0333333	0.09	1.799	0.282044	0.643156
218902	'4930503F20Rik'	lncRNA
218963	'Ubb-ps'	lncRNA	4.16	2.56	5.1	5.4	5.52	8.67	6.53	3.94	53.66	30.96	60.1	73.21	69.99	110.18	84.46	48.24	3.42	2.02	3.97	4.4	4.22	6.71	5.11	3.13667	-1.03535	0.00346956	0.0246551
22109	'Tspy-ps'	lncRNA	0	0.09	0	0	0	0	0	0.03	0	1	0	0	0	0	0	0.333333	0	0.07	0	0	0	0	0	0.0233333	0.747384	0.854672	0.952328
224180	'Gm4827'	lncRNA
224523	'4732491K20Rik'	lncRNA	0.55	0.93	0.52	0.32	0.45	0.51	0.426667	0.666667	20	27	24	23	25	17	21.6667	23.6667	0.45	0.74	0.4	0.26	0.35	0.4	0.336667	0.53	-0.086896	0.837107	0.952328
229613	'6330549D23Rik'	lncRNA	0.46	0.73	0.5	0.86	0.35	0.23	0.48	0.563333	4	6	4	8	3	2	4.33333	4.66667	0.37	0.58	0.39	0.7	0.26	0.18	0.38	0.446667	-0.127102	0.896092	0.97158
231253	'9130230L23Rik'	lncRNA	0.23	0.45	0.82	0.27	0.62	0.5	0.463333	0.5	9	15	26	9	25	12	15.3333	16.6667	0.19	0.36	0.64	0.22	0.48	0.39	0.363333	0.396667	-0.0827525	0.892858	0.970266
231287	'Atp10d'	lncRNA	1.44	1.74	2.43	3.06	3.59	5.68	4.11	1.87	63.12	56.06	53	99.02	114.88	123.02	112.307	57.3933	1.18	1.37	1.89	2.5	2.75	4.39	3.21333	1.48	-1.17731	9.58368e-07	2.31958e-05
231603	'A630023P12Rik'	lncRNA	0.12	0	0.04	0	0.12	0.06	0.06	0.0533333	2	0	1	0	4	1	1.66667	1	0.1	0	0.03	0	0.09	0.05	0.0466667	0.0433333	-0.88483	0.653848	0.952328
232217	'4933427D06Rik'	lncRNA
232386	'Gm38404'	lncRNA
232599	'Gm4876'	lncRNA	0.34	0.82	0.54	0.11	0.71	1.15	0.656667	0.566667	1.92	3	3	1	4.95	7.91	4.62	2.64	0.28	0.65	0.42	0.09	0.54	0.89	0.506667	0.45	-0.991018	0.404007	0.785092
232685	'Lncpint'	lncRNA	57.24	64.92	61.65	72.34	61.67	66.09	66.7	61.27	2155.05	2301.85	2166.35	2733.5	2228.56	2402.6	2454.89	2207.75	47.02	51.18	47.94	59.04	47.17	51.09	52.4333	48.7133	-0.374018	0.00783564	0.0476504
232785	'Zfp783'	lncRNA	1.06	0.76	1.5	0.7	0.87	0.53	0.7	1.10667	45.14	48	48	30.27	36	32	32.7567	47.0467	0.87	0.6	1.16	0.57	0.67	0.41	0.55	0.876667	0.312648	0.31997	0.691356
233045	'Gm26604'	lncRNA
234479	'Gm4890'	lncRNA	2.33	2.05	1.88	1.22	2.11	1.15	1.49333	2.08667	57	46	46	41	51	44	45.3333	49.6667	1.91	1.61	1.46	1	1.61	0.89	1.16667	1.66	-0.076321	0.799822	0.952328
234624	'A330008L17Rik'	lncRNA	0	0	0.01	0	0	0	0	0.00333333	0	0	1	0	0	0	0	0.333333	0	0	0.01	0	0	0	0	0.00333333	0.747384	0.854672	0.952328
234863	'6030466F02Rik'	lncRNA
235302	'D630033O11Rik'	lncRNA	1.9	1.79	2.1	2.49	1.92	1.35	1.92	1.93	67	53	35	73	62	50	61.6667	51.6667	1.56	1.41	1.63	2.03	1.47	1.05	1.51667	1.53333	-0.466167	0.184064	0.491379
236069	'Gm13238'	lncRNA	1.3	2.06	1.83	1.04	2.97	1.53	1.84667	1.73	136.23	209.25	182.18	109.8	300.24	153.41	187.817	175.887	1.07	1.63	1.42	0.85	2.27	1.18	1.43333	1.37333	-0.285881	0.383052	0.762556
236604	'Pisd-ps1'	lncRNA	97.76	110.72	83.33	43.72	76.22	77.26	65.7333	97.27	3886.96	4322.52	3317.7	2031.23	3320.43	3108.16	2819.94	3842.39	80.3	87.3	64.79	35.68	58.3	59.73	51.2367	77.4633	0.243377	0.185104	0.492969
237694	'4932414J04Rik'	lncRNA
23961	'Oas1b'	lncRNA	0.76	1.06	1.09	1.24	0.44	0.77	0.816667	0.97	7	9	9	12	4	7	7.66667	8.33333	0.63	0.83	0.85	1.01	0.34	0.59	0.646667	0.77	-0.115655	0.875254	0.961245
24082	'Map2k3os'	lncRNA	1.75	2.01	2.86	2.48	1.28	1.17	1.64333	2.20667	24	26	36	34	15	18	22.3333	28.6667	1.44	1.59	2.22	2.02	0.98	0.91	1.30333	1.75	0.125327	0.793943	0.952328
241041	'Gm4956'	lncRNA	4.15	6.46	5.2	1.88	2.69	0.38	1.65	5.27	44	64	50	21	28	4	17.6667	52.6667	3.41	5.09	4.04	1.54	2.05	0.29	1.29333	4.18	1.37084	0.012004	0.0667254
242914	'Gm4961'	lncRNA
243373	'AI854703'	lncRNA	0.01	0.01	0.06	0	0	0.01	0.00333333	0.0266667	1	1	5	0	0	1	0.333333	2.33333	0.01	0.01	0.04	0	0	0.01	0.00333333	0.02	2.47238	0.230316	0.568287
258199	'Olfr1300-ps1'	lncRNA
268319	'BC025920'	lncRNA	0	0	0.03	0	0.02	0	0.00666667	0.01	0	0	2	0	1	0	0.333333	0.666667	0	0	0.03	0	0.01	0	0.00333333	0.01	0.651642	0.854573	0.952328
268755	'Mir124a-1hg'	lncRNA
269630	'5031425E22Rik'	lncRNA	28.79	32.61	27.79	19.52	25.22	21.48	22.0733	29.73	910.34	963.53	808.25	678.64	770.33	682.14	710.37	894.04	23.65	25.71	21.61	15.93	19.29	16.61	17.2767	23.6567	0.121042	0.33848	0.712522
269683	'E130006D01Rik'	lncRNA
272350	'Gm5065'	lncRNA	0	0.01	0	0.02	0	0.01	0.01	0.00333333	0	1.42	0	6	1	2.13	3.04333	0.473333	0	0	0	0.02	0	0.01	0.01	0	-3.31514	0.0790812	0.276121
27493	'A230006K03Rik'	lncRNA
279610	'E530001F21Rik'	lncRNA
286951	'Eif2c5'	lncRNA
319208	'4930403D09Rik'	lncRNA	0.12	0.15	0.15	0.06	0.04	0.04	0.0466667	0.14	10	12	12	5	3	3	3.66667	11.3333	0.1	0.12	0.12	0.05	0.03	0.03	0.0366667	0.113333	1.40558	0.0654028	0.240873
319210	'Vmn2r-ps11'	lncRNA
319213	'4930579C12Rik'	lncRNA	0.01	0	0	0	0	0.01	0.00333333	0.00333333	1	0	0	0	0	1	0.333333	0.333333	0.01	0	0	0	0	0.01	0.00333333	0.00333333	-0.214388	0.956448	0.975955
319215	'4932413F04Rik'	lncRNA
319216	'4932441J04Rik'	lncRNA	0.01	0.02	0	0.01	0	0.13	0.0466667	0.01	1	2	0	0.22	0	2.72	0.98	1	0.01	0.02	0	0.01	0	0.1	0.0366667	0.01	0.364691	0.886202	0.966788
319247	'9530080O11Rik'	lncRNA	0.25	0.2	0.22	0.27	0.32	0.3	0.296667	0.223333	37.04	28.42	29.55	39.86	45.4	41.2	42.1533	31.67	0.21	0.16	0.17	0.22	0.25	0.23	0.233333	0.18	-0.620463	0.0662283	0.242992
319251	'9630001P10Rik'	lncRNA
319314	'A930001C03Rik'	lncRNA	2.37	2.2	2.69	0.75	1.32	0.91	0.993333	2.42	57	57	71	26	42	29	32.3333	61.6667	1.95	1.74	2.09	0.61	1.01	0.7	0.773333	1.92667	0.723656	0.0233704	0.111593
319317	'Snhg11'	lncRNA	5.07	3.8	5.84	5.29	5.34	4.36	4.99667	4.90333	228	161.05	219.25	198	216	179	197.667	202.767	4.16	3	4.54	4.32	4.09	3.37	3.92667	3.9	-0.174618	0.387549	0.768409
319336	'C130036L24Rik'	lncRNA	1.87	1.86	2.17	2.69	2.34	2.4	2.47667	1.96667	151.81	144.37	165.9	224.13	184.05	187.53	198.57	154.027	1.54	1.46	1.69	2.2	1.79	1.85	1.94667	1.56333	-0.591064	0.00237354	0.0181025
319371	'D030028A08Rik'	lncRNA	0.81	1.72	1.43	1.35	2.04	1.29	1.56	1.32	33	50	51	53	63	49	55	44.6667	0.67	1.36	1.11	1.1	1.56	1	1.22	1.04667	-0.515527	0.0916752	0.305793
319405	'D430036J16Rik'	lncRNA
319454	'Rptoros'	lncRNA	1.22	1.32	1.15	1.14	1.18	1.02	1.11333	1.23	73	75	64	69	68	59	65.3333	70.6667	1	1.04	0.89	0.93	0.9	0.79	0.873333	0.976667	-0.100335	0.695263	0.952328
319466	'9330199G10Rik'	lncRNA
319467	'A930002C04Rik'	lncRNA	0.04	0.04	0	0.16	0.08	0.17	0.136667	0.0266667	1	1	0	4	2	4	3.33333	0.666667	0.03	0.03	0	0.13	0.06	0.13	0.106667	0.02	-2.54373	0.103976	0.333827
319472	'9330158H04Rik'	lncRNA
319487	'A230028O05Rik'	lncRNA	0.14	0.04	0.09	0	0.01	0.04	0.0166667	0.09	7	3	6	0	1	3	1.33333	5.33333	0.11	0.03	0.07	0	0.01	0.03	0.0133333	0.07	1.79549	0.161542	0.45015
319506	'7530428D23Rik'	lncRNA
319533	'8030451O07Rik'	lncRNA
319545	'D430020J02Rik'	lncRNA	0	0.01	0.02	0.02	0.02	0.07	0.0366667	0.01	0	2	4	4	3	12	6.33333	2	0	0.01	0.02	0.02	0.01	0.05	0.0266667	0.01	-1.90441	0.113228	0.355103
319551	'6330420H09Rik'	lncRNA
319572	'C730027H18Rik'	lncRNA	18.56	21.33	21.03	13.85	16.44	14.26	14.85	20.3067	827	818	670	570	667	642	626.333	771.667	15.25	16.82	16.35	11.3	12.58	11.02	11.6333	16.14	0.0916706	0.524475	0.88023
319574	'Gm20735'	lncRNA
319587	'4930539J05Rik'	lncRNA	1.7	1.49	1.66	1.16	1.28	1.65	1.36333	1.61667	164	153	150	96	125	126	115.667	155.667	1.4	1.17	1.29	0.94	0.98	1.28	1.06667	1.28667	0.21909	0.271276	0.627705
319596	'D830032E09Rik'	lncRNA	0.11	0.02	0.12	0.06	0	0	0.02	0.0833333	5	1	5	3	0	0	1	3.66667	0.09	0.02	0.09	0.05	0	0	0.0166667	0.0666667	1.62216	0.333039	0.706482
319616	'Fzd10os'	lncRNA
319626	'9530059O14Rik'	lncRNA
319646	'D630013N20Rik'	lncRNA
319650	'A430108G06Rik'	lncRNA	0.13	0.07	0	0	0	0	0	0.0666667	4	2	0	0	0	0	0	2	0.1	0.05	0	0	0	0	0	0.05	3.25444	0.238392	0.580162
319673	'9330159M07Rik'	lncRNA	3.21	4.75	2.95	7.16	4.48	6.38	6.00667	3.63667	191.36	227.55	149.98	437.41	295.15	399.47	377.343	189.63	2.64	3.75	2.3	5.85	3.43	4.93	4.73667	2.89667	-1.2199	5.63171e-07	1.46128e-05
319682	'D830026I12Rik'	lncRNA	0	0.05	0	0.05	0	0.02	0.0233333	0.0166667	0	3	0	1	0	1	0.666667	1	0	0.04	0	0.04	0	0.01	0.0166667	0.0133333	0.327415	0.899477	0.972542
319684	'5031425F14Rik'	lncRNA	0.31	0.4	0.58	0.17	0.15	0.16	0.16	0.43	30	39	36	20	16	15	17	35	0.25	0.31	0.45	0.14	0.11	0.12	0.123333	0.336667	0.821973	0.0441173	0.179981
319702	'A830011K09Rik'	lncRNA
319707	'C430002N11Rik'	lncRNA
319711	'E230029C05Rik'	lncRNA	4.46	5.11	6.43	2.51	3.29	2.76	2.85333	5.33333	273.54	281	298.84	134.88	171.14	134.82	146.947	284.46	3.66	4.03	5	2.05	2.52	2.13	2.23333	4.23	0.746079	4.96263e-06	9.78861e-05
319720	'9630028I04Rik'	lncRNA
319722	'E330033B04Rik'	lncRNA	1.56	2.6	1.53	0.72	1.31	1.19	1.07333	1.89667	93	114	85	44	76	68	62.6667	97.3333	1.28	2.05	1.19	0.59	1	0.92	0.836667	1.50667	0.429898	0.120974	0.371739
319727	'A330035P11Rik'	lncRNA	2.49	1.4	1.88	2.93	2.43	2.11	2.49	1.92333	91	83	106	129	106	112	115.667	93.3333	2.04	1.11	1.46	2.39	1.86	1.63	1.96	1.53667	-0.529553	0.0219447	0.106305
319743	'9630013D21Rik'	lncRNA	6.24	5.09	5.82	1.87	3.57	2.4	2.61333	5.71667	172	165	181	65	101	84	83.3333	172.667	5.12	4.01	4.52	1.52	2.73	1.86	2.03667	4.55	0.843747	6.72501e-05	0.000911536
319750	'A230009B12Rik'	lncRNA
319752	'B230209E15Rik'	lncRNA
319760	'D130020L05Rik'	lncRNA	7.09	6.8	5.56	2.13	3.88	4.01	3.34	6.48333	444	413.68	313	142.99	223	276	213.997	390.227	5.82	5.36	4.33	1.74	2.97	3.1	2.60333	5.17	0.664292	0.00942495	0.0551991
319781	'9530051G07Rik'	lncRNA	0.04	0.03	0.04	0.01	0.02	0.01	0.0133333	0.0366667	5	4	5	1	2	1	1.33333	4.66667	0.03	0.03	0.03	0.01	0.01	0.01	0.01	0.03	1.60364	0.180774	0.485317
319783	'A730056A06Rik'	lncRNA
319786	'B930059L03Rik'	lncRNA	0.93	1.25	1.19	0.98	1.26	0.96	1.06667	1.12333	22	28	26	24	29	22	25	25.3333	0.77	0.99	0.93	0.8	0.96	0.74	0.833333	0.896667	-0.193468	0.622488	0.936862
319798	'A730090N16Rik'	lncRNA	0.09	0	0.1	0.09	0.29	0.09	0.156667	0.0633333	2	0	2	2	3	2	2.33333	1.33333	0.08	0	0.08	0.07	0.22	0.07	0.12	0.0533333	-1.00931	0.494408	0.863698
319803	'A430090L17Rik'	lncRNA	1.52	1.72	1.81	3.19	1.8	2.48	2.49	1.68333	65	70	72	140	75	102	105.667	69	1.25	1.35	1.41	2.6	1.38	1.92	1.96667	1.33667	-0.845228	0.00604243	0.0386627
319812	'9430018G01Rik'	lncRNA	0.02	0.01	0.02	0.01	0	0.01	0.00666667	0.0166667	2	1	2	1	0	1	0.666667	1.66667	0.02	0.01	0.02	0.01	0	0.01	0.00666667	0.0166667	1.08818	0.554844	0.90249
319818	'A930011G23Rik'	lncRNA	0.03	0.02	0.02	0.01	0.02	0.09	0.04	0.0233333	4	3	2	1	2	11	4.66667	3	0.03	0.02	0.01	0.01	0.01	0.07	0.03	0.02	-0.849603	0.473604	0.843563
319819	'4932435O22Rik'	lncRNA
319830	'1500004A13Rik'	lncRNA	0.76	0.55	0.47	0.4	0.46	0.22	0.36	0.593333	23.02	24	10.84	12.46	14.12	5	10.5267	19.2867	0.63	0.43	0.36	0.33	0.35	0.17	0.283333	0.473333	0.676803	0.282813	0.644287
319849	'Plxna4os1'	lncRNA	0.12	0.17	0.11	0.04	0.06	0.11	0.07	0.133333	6	8	5	2	3	5	3.33333	6.33333	0.1	0.13	0.08	0.03	0.05	0.08	0.0533333	0.103333	0.714115	0.433556	0.809402
319865	'E130114P18Rik'	lncRNA	0	0	0	0.01	0	0	0.00333333	0	0	0	0	1	0	0	0.333333	0	0	0	0	0.01	0	0	0.00333333	0	-1.17617	0.773161	0.952328
319870	'9330136K24Rik'	lncRNA	1.12	1.68	1.22	0.62	1.01	1.19	0.94	1.34	63.04	77.7	56.99	35.88	54.13	55.56	48.5233	65.91	0.92	1.32	0.95	0.51	0.77	0.92	0.733333	1.06333	0.236882	0.437085	0.812121
319871	'4732490B19Rik'	lncRNA	0	0.03	0.02	0.03	0	0	0.01	0.0166667	0	2	1	2	0	0	0.666667	1	0	0.03	0.01	0.03	0	0	0.01	0.0133333	0.302776	0.905287	0.97475
319893	'A230057D06Rik'	lncRNA	12.41	12.25	12.85	16.27	15.65	12.44	14.7867	12.5033	646.17	595.14	658	766.55	685.13	585.56	679.08	633.103	10.2	9.66	10	13.28	11.97	9.62	11.6233	9.95333	-0.317609	0.0416599	0.172491
319894	'E330017L17Rik'	lncRNA	0	0	0	0	0.06	0.06	0.04	0	0	0	0	0	1	1	0.666667	0	0	0	0	0	0.04	0.04	0.0266667	0	-2.04168	0.596122	0.923935
319903	'9630013A20Rik'	lncRNA	0	0	0.02	0	0	0	0	0.00666667	0	0	1	0	0	0	0	0.333333	0	0	0.02	0	0	0	0	0.00666667	0.747384	0.854672	0.952328
319931	'A330032B11Rik'	lncRNA	0.14	0.03	0.15	0.16	0.09	0.08	0.11	0.106667	6.68	1.4	6.57	7.99	4.2	3.63	5.27333	4.88333	0.12	0.02	0.12	0.13	0.07	0.06	0.0866667	0.0866667	-0.328099	0.745284	0.952328
319940	'Sorbs2os'	lncRNA	2.46	4.66	2.99	1.22	3.44	2.83	2.49667	3.37	199	266	225	101	199	219	173	230	2.02	3.68	2.32	1	2.63	2.19	1.94	2.67333	0.204918	0.453338	0.825233
319951	'A230001M10Rik'	lncRNA	0.68	0.53	0.88	0.33	0.45	0.24	0.34	0.696667	32.02	31	27	17.77	29	19.51	22.0933	30.0067	0.56	0.42	0.69	0.27	0.34	0.19	0.266667	0.556667	0.266525	0.513343	0.877628
319960	'4930513N10Rik'	lncRNA	0.09	0.09	0.08	0.21	0.38	0.07	0.22	0.0866667	9	8	7	8	11	6	8.33333	8	0.08	0.07	0.06	0.17	0.29	0.06	0.173333	0.07	-0.263669	0.698669	0.952328
319970	'B230323A14Rik'	lncRNA
319973	'A630077J23Rik'	lncRNA	0.09	0	0.05	0.04	0	0.05	0.03	0.0466667	2	0	1	1	0	1	0.666667	1	0.07	0	0.04	0.03	0	0.03	0.02	0.0366667	0.358397	0.873319	0.960465
319981	'C530044C16Rik'	lncRNA	0	0	0	0.03	0	0	0.01	0	0	0	0	1	0	0	0.333333	0	0	0	0	0.03	0	0	0.01	0	-1.17617	0.773161	0.952328
319982	'5930430L01Rik'	lncRNA	2.6	2.55	2.27	0.86	1.6	1.43	1.29667	2.47333	276	259	224	93	164.23	145	134.077	253	2.14	2.01	1.76	0.7	1.22	1.11	1.01	1.97	0.715456	0.00160366	0.0131168
319983	'9330111N05Rik'	lncRNA	0.11	0.04	0.19	0.07	0.34	0.22	0.21	0.113333	6	2	10	4	7.06	12.2	7.75333	6	0.09	0.03	0.14	0.06	0.26	0.17	0.163333	0.0866667	-0.567379	0.512132	0.877075
320014	'B930025P03Rik'	lncRNA	4.81	3.75	5.27	11.66	7.64	13.37	10.89	4.61	212.99	162.19	175.16	479.33	307.99	532.03	439.783	183.447	3.95	2.96	4.1	9.52	5.84	10.34	8.56667	3.67	-1.48702	7.96646e-09	3.29643e-07
320019	'Ptgs2os'	lncRNA
320020	'6330415G19Rik'	lncRNA	0.5	0	0.29	0.23	0.74	0	0.323333	0.263333	2	0	1	1	3	0	1.33333	1	0.41	0	0.22	0.18	0.57	0	0.25	0.21	-0.579563	0.774752	0.952328
320021	'C430042M11Rik'	lncRNA	0	0	1.79	0	0	0	0	0.596667	0	0	1	0	0	0	0	0.333333	0	0	1.39	0	0	0	0	0.463333	0.747384	0.854672	0.952328
320026	'A330076H08Rik'	lncRNA
320038	'Dlx6os1'	lncRNA
320046	'F730043M19Rik'	lncRNA	0.4	1.07	1.84	0.31	0.62	0.12	0.35	1.10333	23.91	29	31.98	6	18.04	7	10.3467	28.2967	0.33	0.84	1.43	0.25	0.47	0.1	0.273333	0.866667	1.22322	0.024358	0.114965
320054	'9230116N13Rik'	lncRNA	0.16	0.15	0.39	0.18	0.23	0.19	0.2	0.233333	10.81	10.02	24.64	12.87	15.25	12.19	13.4367	15.1567	0.13	0.12	0.3	0.15	0.18	0.14	0.156667	0.183333	-0.0442918	0.9399	0.975955
320064	'D130017N08Rik'	lncRNA	0.89	1.15	1.52	0.74	0.54	0.75	0.676667	1.18667	80	95.86	112.26	57.04	50.42	56.96	54.8067	96.04	0.73	0.9	1.18	0.6	0.42	0.58	0.533333	0.936667	0.595463	0.0221955	0.107153
320069	'3830432H09Rik'	lncRNA
320072	'A830019L24Rik'	lncRNA
320088	'C030034L19Rik'	lncRNA	0.03	0.08	0.1	0.09	0.09	0.13	0.103333	0.07	4	9	13	12	7	13	10.6667	8.66667	0.03	0.06	0.08	0.07	0.07	0.1	0.08	0.0566667	-0.535331	0.443383	0.817722
320099	'BC106179'	lncRNA	0.16	0.15	0.22	0.06	0.17	0.17	0.133333	0.176667	16	12	22	7.01	18	18.06	14.3567	16.6667	0.14	0.12	0.17	0.05	0.13	0.13	0.103333	0.143333	0.0136642	0.980812	0.989127
320132	'A230108P19Rik'	lncRNA	0	0.23	0	0.04	0	0.2	0.08	0.0766667	0	1	0	1	0	1	0.666667	0.333333	0	0.18	0	0.03	0	0.15	0.06	0.06	-1.14395	0.69443	0.952328
320152	'4930412C18Rik'	lncRNA	3.2	2.75	1.36	1.61	1.6	1.55	1.58667	2.43667	168	152	111	76	83	73	77.3333	143.667	2.63	2.17	1.06	1.32	1.22	1.2	1.24667	1.95333	0.685324	0.00617183	0.0392429
320155	'C730002L08Rik'	lncRNA	2.47	1.21	1.1	0.43	0.87	1.13	0.81	1.59333	68	52	46	20	38	49	35.6667	55.3333	2.03	0.95	0.85	0.35	0.66	0.87	0.626667	1.27667	0.431966	0.273171	0.630505
320163	'4930525G20Rik'	lncRNA	0.19	0.24	0.23	0.3	0.26	0.15	0.236667	0.22	15	18	16	23	21	12	18.6667	16.3333	0.16	0.19	0.18	0.25	0.2	0.12	0.19	0.176667	-0.408586	0.409485	0.789188
320172	'E230016M11Rik'	lncRNA	8.37	3.66	2.84	1.54	2.26	1.83	1.87667	4.95667	251	117	91	54	62	61	59	153	6.87	2.88	2.21	1.25	1.73	1.41	1.46333	3.98667	1.17838	0.00270825	0.0201405
320174	'A830082K12Rik'	lncRNA	1.68	0.87	0.99	1.2	1.08	1.19	1.15667	1.18	27	25	23	21	19	23.01	21.0033	25	1.38	0.69	0.77	0.98	0.83	0.92	0.91	0.946667	0.0363693	0.929953	0.975955
320176	'D930032P07Rik'	lncRNA	0	0	0	0.3	0.27	0.22	0.263333	0	0	0	0	7	7	6	6.66667	0	0	0	0	0.24	0.2	0.17	0.203333	0	-5.39438	0.000505203	0.00501964
320178	'4921529L05Rik'	lncRNA	0	0	0.04	0.03	0	0	0.01	0.0133333	0	0	1	1	0	0	0.333333	0.333333	0	0	0.03	0.03	0	0	0.01	0.01	-0.214388	0.95654	0.975955
320203	'C130071C03Rik'	lncRNA	0	0	0.01	0	0	0	0	0.00333333	0	0	1	0	0	0	0	0.333333	0	0	0.01	0	0	0	0	0.00333333	0.747384	0.854672	0.952328
320210	'A230077H06Rik'	lncRNA	0.17	0.17	0.14	0.1	0.11	0.17	0.126667	0.16	10.94	10.11	8.04	6.68	6.51	10.96	8.05	9.69667	0.14	0.13	0.11	0.08	0.08	0.13	0.0966667	0.126667	0.133275	0.845108	0.952328
320229	'9530052C20Rik'	lncRNA	0.1	0.05	0.17	0	0.15	0.05	0.0666667	0.106667	2	1	3	0	1	1	0.666667	2	0.08	0.04	0.13	0	0.12	0.04	0.0533333	0.0833333	1.38527	0.439834	0.814956
320249	'D130009I18Rik'	lncRNA
320268	'B930095G15Rik'	lncRNA	3.91	3.51	3.97	4.7	4.55	4.56	4.60333	3.79667	321.13	279.91	305.18	357.33	342.6	343.04	347.657	302.073	3.21	2.76	3.08	3.84	3.48	3.53	3.61667	3.01667	-0.418292	0.0057979	0.0374098
320295	'C920006O11Rik'	lncRNA	4.36	3.55	2.92	1.4	2.12	2.31	1.94333	3.61	178	157	123	84	86	87	85.6667	152.667	3.58	2.8	2.27	1.15	1.62	1.79	1.52	2.88333	0.623303	0.00850317	0.0508625
320297	'A830009L08Rik'	lncRNA	0.03	0	0.03	0	0.01	0	0.00333333	0.02	2	0	2	0	1	0	0.333333	1.33333	0.02	0	0.02	0	0.01	0	0.00333333	0.0133333	1.68783	0.506509	0.872763
320301	'E530011L22Rik'	lncRNA	0	0.21	0.11	0.04	0.02	0.07	0.0433333	0.106667	0	8	7	3	1	5	3	5	0	0.16	0.08	0.03	0.02	0.06	0.0366667	0.08	0.484715	0.705831	0.952328
320312	'A430035B10Rik'	lncRNA	0.34	0.38	0.4	0.11	0.23	0.21	0.183333	0.373333	46	50	51	15	30	27	24	49	0.28	0.3	0.31	0.09	0.17	0.16	0.14	0.296667	0.823713	0.0242694	0.114689
320363	'D030045P18Rik'	lncRNA	0	0	0	0	0.02	0	0.00666667	0	0	0	0	0	1	0	0.333333	0	0	0	0	0	0.02	0	0.00666667	0	-1.17617	0.773161	0.952328
320377	'9330175E14Rik'	lncRNA	0.81	1.21	0.78	0.72	0.74	0.58	0.68	0.933333	130	182	117	118	115	80	104.333	143	0.66	0.96	0.6	0.59	0.56	0.45	0.533333	0.74	0.240033	0.36538	0.741277
320390	'E330035G20Rik'	lncRNA
320440	'9530091C08Rik'	lncRNA	1.52	1.1	1.74	0.6	1.03	0.84	0.823333	1.45333	64	44	68	26	42	34	34	58.6667	1.25	0.87	1.35	0.49	0.79	0.65	0.643333	1.15667	0.581548	0.0872994	0.295823
320449	'A730004F24Rik'	lncRNA
320453	'Dlx4os'	lncRNA
320456	'B330016D10Rik'	lncRNA	0.81	1.19	0.93	0.74	0.81	1	0.85	0.976667	33	46	35	31	32	39	34	38	0.67	0.94	0.72	0.61	0.62	0.77	0.666667	0.776667	-0.0561154	0.871757	0.960027
320463	'F630111L10Rik'	lncRNA	0.18	0.09	0.32	0.02	0.04	0.11	0.0566667	0.196667	14	8	23	2	3	9	4.66667	15	0.14	0.07	0.25	0.02	0.03	0.09	0.0466667	0.153333	1.46466	0.0710143	0.256109
320469	'9930014A18Rik'	lncRNA	0.11	0.09	0.19	0.07	0.08	0.1	0.0833333	0.13	14	11	19	10	9	9	9.33333	14.6667	0.09	0.07	0.15	0.05	0.06	0.08	0.0633333	0.103333	0.433893	0.454483	0.826076
320478	'Sox2ot'	lncRNA
320479	'C330024D21Rik'	lncRNA	0	0	0	0.21	0	0	0.07	0	0	0	0	1	0	0	0.333333	0	0	0	0	0.17	0	0	0.0566667	0	-1.17617	0.773161	0.952328
320482	'Nron'	lncRNA	0.06	0	0	0.01	0	0	0.00333333	0.02	1	0	0	1	0	0	0.333333	0.333333	0.05	0	0	0.01	0	0	0.00333333	0.0166667	-0.214388	0.956135	0.975955
320485	'B230312C02Rik'	lncRNA	0	0.01	0	0	0	0	0	0.00333333	0	1	0	0	0	0	0	0.333333	0	0.01	0	0	0	0	0	0.00333333	0.747384	0.854672	0.952328
320507	'D930015M05Rik'	lncRNA	0.03	0.03	0.03	0	0	0	0	0.03	1	1	1	0	0	0	0	1	0.03	0.03	0.03	0	0	0	0	0.03	2.22859	0.444487	0.818003
320566	'A830029E22Rik'	lncRNA
320586	'A630089N07Rik'	lncRNA	6.32	5.72	6.87	4.23	6.12	5.26	5.20333	6.30333	996.94	890.23	992	768.78	933.12	874.56	858.82	959.723	5.19	4.51	5.34	3.45	4.68	4.07	4.06667	5.01333	-0.0497216	0.674086	0.952328
320593	'A230051N06Rik'	lncRNA
320614	'A330033J07Rik'	lncRNA	0.09	0	0	0.1	0.01	0.04	0.05	0.03	2	0	0	3	2	4	3	0.666667	0.07	0	0	0.08	0.01	0.03	0.04	0.0233333	-2.37188	0.16407	0.45439
320616	'B130006D01Rik'	lncRNA	0.92	1.42	1.52	1.1	1.6	1.3	1.33333	1.28667	51	75	78	62	86	69	72.3333	68	0.76	1.12	1.18	0.89	1.23	1.01	1.04333	1.02	-0.301889	0.26657	0.620722
320624	'4930474G06Rik'	lncRNA	0	0	0	0	0.02	0	0.00666667	0	0	0	0	0	1	0	0.333333	0	0	0	0	0	0.01	0	0.00333333	0	-1.17617	0.773161	0.952328
320626	'9230105E05Rik'	lncRNA	0	0	0	0	0.02	0	0.00666667	0	0	0	0	0	1	0	0.333333	0	0	0	0	0	0.01	0	0.00333333	0	-1.17617	0.773161	0.952328
320638	'A730006G06Rik'	lncRNA
320671	'D130079A08Rik'	lncRNA
320684	'9630028H03Rik'	lncRNA	0	0	0.03	0	0	0.03	0.01	0.01	0	0	1	0	0	1	0.333333	0.333333	0	0	0.02	0	0	0.02	0.00666667	0.00666667	-0.214388	0.95686	0.975955
320692	'9430037G07Rik'	lncRNA	1.62	1.49	1.66	5.6	3.31	4.73	4.54667	1.59	145.33	143.23	136.23	564.05	325.07	441.52	443.547	141.597	1.33	1.17	1.29	4.57	2.53	3.66	3.58667	1.26333	-1.87765	4.02551e-14	4.43272e-12
320719	'6030443J06Rik'	lncRNA	4.52	3.54	3.77	2.81	3.21	3.1	3.04	3.94333	202.82	155.63	155.42	134.79	161.78	133.57	143.38	171.29	3.71	2.79	2.93	2.3	2.46	2.4	2.38667	3.14333	0.0517393	0.803933	0.952328
320737	'4732416N19Rik'	lncRNA	2.82	2.75	3.65	3.38	3.51	3.85	3.58	3.07333	254	222	290.02	296	280	299.98	291.993	255.34	2.32	2.17	2.84	2.76	2.68	2.98	2.80667	2.44333	-0.409333	0.0155763	0.0818351
320739	'6530403H02Rik'	lncRNA	1.26	1.22	1.79	1.24	1.37	1.14	1.25	1.42333	141.14	130.33	187.99	140.77	148.88	121.5	137.05	153.153	1.04	0.96	1.39	1.01	1.05	0.89	0.983333	1.13	-0.0524258	0.806306	0.952328
320742	'A230072C01Rik'	lncRNA	3.12	3.41	3.06	2.84	2.38	2.63	2.61667	3.19667	143.6	145.06	145.99	145.45	111.59	126.68	127.907	144.883	2.56	2.69	2.38	2.32	1.82	2.03	2.05667	2.54333	-0.0397393	0.85152	0.952328
320775	'B230319C09Rik'	lncRNA	0.07	0.17	0.69	0.14	0.28	0.1	0.173333	0.31	4	6	4	3	4	4	3.66667	4.66667	0.06	0.13	0.54	0.11	0.22	0.08	0.136667	0.243333	0.135938	0.883768	0.965864
320784	'C230072F16Rik'	lncRNA	0.63	0.88	0.9	0.66	0.65	0.57	0.626667	0.803333	42.69	57.65	61.36	46.9	43.73	37.2	42.61	53.9	0.51	0.7	0.7	0.54	0.49	0.44	0.49	0.636667	0.125217	0.686167	0.952328
320805	'C330018A13Rik'	lncRNA
320842	'C230035I16Rik'	lncRNA	0.55	0.68	0.79	0.17	0.2	0.23	0.2	0.673333	18	19	29	8	12	16	12	22	0.45	0.54	0.61	0.14	0.15	0.17	0.153333	0.533333	0.659182	0.207516	0.53213
320845	'A230056P14Rik'	lncRNA	2.13	2.4	1.89	1.27	2.09	1.72	1.69333	2.14	50	58.05	57	39.74	43	46	42.9133	55.0167	1.75	1.89	1.47	1.03	1.6	1.33	1.32	1.70333	0.151375	0.599854	0.926414
320846	'A530058N18Rik'	lncRNA	0	0	0.08	0	0.03	0	0.01	0.0266667	0	0	2.55	0	1	0	0.333333	0.85	0	0	0.07	0	0.02	0	0.00666667	0.0233333	0.651642	0.854573	0.952328
320871	'B230206H07Rik'	lncRNA	0.16	0.08	0.06	0.1	0.17	0.2	0.156667	0.1	11	6	4	7	11	13	10.3333	7	0.13	0.06	0.05	0.08	0.13	0.15	0.12	0.08	-0.760853	0.289446	0.654267
320872	'Arhgap15os'	lncRNA	0.07	0.07	0.07	0.05	0.08	0.02	0.05	0.07	5	5	6	4	6	2	4	5.33333	0.06	0.05	0.05	0.04	0.06	0.02	0.04	0.0533333	0.209524	0.817447	0.952328
320879	'B230217O12Rik'	lncRNA	4.08	3.71	3.33	2.55	3.19	2.15	2.63	3.70667	150	133	114	94	112	78	94.6667	132.333	3.35	2.93	2.59	2.08	2.44	1.66	2.06	2.95667	0.276389	0.241708	0.584805
320893	'6430562O15Rik'	lncRNA	0.03	0.03	0.07	0.06	0.03	0.02	0.0366667	0.0433333	5	3	7	9	4	2	5	5	0.03	0.03	0.05	0.05	0.02	0.01	0.0266667	0.0366667	-0.232209	0.807573	0.952328
320896	'C330020E22Rik'	lncRNA	0.31	0.24	0.27	0.08	0.06	0.15	0.0966667	0.273333	10	9	20.99	6	6.22	14	8.74	13.33	0.25	0.19	0.21	0.06	0.04	0.12	0.0733333	0.216667	0.36014	0.601391	0.926559
320919	'A230107N01Rik'	lncRNA	0.1	0.18	0.36	0.16	0.12	0.22	0.166667	0.213333	6	7	14	7	5	9	7	9	0.08	0.14	0.28	0.13	0.09	0.17	0.13	0.166667	0.133537	0.855779	0.952702
320933	'D230017M19Rik'	lncRNA	0.79	0.26	0.34	0.29	0.08	0.33	0.233333	0.463333	20	16	15	9	10	12	10.3333	17	0.65	0.21	0.26	0.24	0.06	0.25	0.183333	0.373333	0.507784	0.34743	0.721303
320936	'AU041480'	lncRNA
320939	'5930403L14Rik'	lncRNA	0.05	0.1	0.18	0.05	0.06	0.02	0.0433333	0.11	5	9	15	5	5	2	4	9.66667	0.04	0.08	0.14	0.04	0.04	0.02	0.0333333	0.0866667	1.04988	0.214145	0.543997
320949	'D830039M14Rik'	lncRNA	0	0	0	0	0	0.01	0.00333333	0	0	0	0	0	0	1	0.333333	0	0	0	0	0	0	0.01	0.00333333	0	-1.17617	0.773161	0.952328
320950	'9330104G04Rik'	lncRNA	0.21	0.23	0.27	0.03	0.14	0.07	0.08	0.236667	8	12	11	2	6	4	4	10.3333	0.17	0.18	0.21	0.03	0.11	0.05	0.0633333	0.186667	1.16506	0.137426	0.404976
320961	'A630026N12Rik'	lncRNA	5.43	4.61	5.57	4.15	4.07	4.03	4.08333	5.20333	194	154	177	144	136	138	139.333	175	4.46	3.63	4.33	3.38	3.12	3.12	3.20667	4.14	0.11463	0.560585	0.907011
320965	'4831440E17Rik'	lncRNA	0.5	1.17	0.77	0.56	0.83	0.32	0.57	0.813333	19	27	22	15	22	12	16.3333	22.6667	0.41	0.93	0.6	0.46	0.63	0.24	0.443333	0.646667	0.264489	0.572839	0.917865
320973	'D330023K18Rik'	lncRNA	2.23	1.69	2.79	1.43	1.15	1.15	1.24333	2.23667	56	46	52	32	32	32	32	51.3333	1.83	1.33	2.17	1.17	0.88	0.89	0.98	1.77667	0.468654	0.140504	0.411178
320975	'D330050G23Rik'	lncRNA	0.04	0	0	0.05	0	0.09	0.0466667	0.0133333	1	0	0	2	0	1	1	0.333333	0.03	0	0	0.04	0	0.07	0.0366667	0.01	-1.7379	0.511518	0.876295
320977	'A330023F24Rik'	lncRNA	28.45	25.53	24.52	34.05	31.26	31.5	32.27	26.1667	2124	1988	1704	2693	2346	2168	2402.33	1938.67	23.37	20.13	19.06	27.79	23.91	24.35	25.35	20.8533	-0.524995	0.00100591	0.0089025
321017	'9230116L04Rik'	lncRNA
327744	'E130307A14Rik'	lncRNA	1.42	1.95	1.77	1.37	1.41	1.82	1.53333	1.71333	55.12	70.4	108.09	51.9	75.89	76.09	67.96	77.87	1.16	1.54	1.38	1.12	1.08	1.41	1.20333	1.36	-0.00969726	0.975695	0.986617
327749	'Gm5079'	lncRNA
327760	'Gm20611'	lncRNA	0	0.01	0.01	0.02	0.01	0.05	0.0266667	0.00666667	0	1	1	3	1.02	5.16	3.06	0.666667	0	0	0.01	0.01	0	0.04	0.0166667	0.00333333	-2.4132	0.144889	0.419858
327768	'A330049N07Rik'	lncRNA
327812	'Gm15663'	lncRNA	0.41	0.41	0.33	1.21	0.72	0.97	0.966667	0.383333	20	16	22	59	34	43	45.3333	19.3333	0.33	0.32	0.25	0.99	0.55	0.75	0.763333	0.3	-1.4563	0.000421029	0.00430387
327860	'Gm11961'	lncRNA
327872	'Gm12018'	lncRNA	0.01	0.05	0.08	0.03	0.03	0.04	0.0333333	0.0466667	1	4.12	6.69	3.08	2.98	3.62	3.22667	3.93667	0.01	0.04	0.06	0.03	0.02	0.03	0.0266667	0.0366667	0.223819	0.844211	0.952328
327946	'Gm12295'	lncRNA
328061	'Gm38407'	lncRNA
328136	'Gm805'	lncRNA	0	0	0.01	0	0	0	0	0.00333333	0	0	1	0	0	0	0	0.333333	0	0	0.01	0	0	0	0	0.00333333	0.747384	0.854672	0.952328
328235	'Gm5083'	lncRNA
328263	'A530065N20Rik'	lncRNA	0.02	0.04	0.04	0.03	0.02	0.39	0.146667	0.0333333	1	2	2	1	1	1	1	1.66667	0.02	0.03	0.03	0.02	0.01	0.3	0.11	0.0266667	0.516196	0.747693	0.952328
328287	'Gm20554'	lncRNA	0	0	0	0	0	0	0	0	0	0	0	1	0	0	0.333333	0	0	0	0	0	0	0	0	0	-1.17617	0.773161	0.952328
328314	'Gm5086'	lncRNA	0.38	0.77	0.76	0.12	0.2	0.13	0.15	0.636667	10	18	18	3	5	3	3.66667	15.3333	0.31	0.61	0.59	0.1	0.15	0.1	0.116667	0.503333	1.85057	0.0114614	0.064232
328320	'Gm807'	lncRNA
328324	'5930438M14Rik'	lncRNA
328354	'Gm5087'	lncRNA	0	0	0	0	0	0.06	0.02	0	0	0	0	0	0	1	0.333333	0	0	0	0	0	0	0.05	0.0166667	0	-1.17617	0.773161	0.952328
328385	'D330046F09Rik'	lncRNA
328479	'Gm5089'	lncRNA
328489	'Gm2093'	lncRNA	0.05	0.04	0.04	0.03	0.02	0.01	0.02	0.0433333	5	4	3.68	3	2	1	2	4.22667	0.04	0.04	0.03	0.03	0.02	0.01	0.02	0.0366667	0.785722	0.491049	0.860774
328579	'B230214G05Rik'	lncRNA	0	0	0	0	0	0.04	0.0133333	0	0	0	0	0	0	1	0.333333	0	0	0	0	0	0	0.03	0.01	0	-1.17617	0.773161	0.952328
328646	'Gm16863'	lncRNA
328657	'Gm1968'	lncRNA	0	0	0	0	0.01	0	0.00333333	0	0	0	0	0	1	0	0.333333	0	0	0	0	0	0.01	0	0.00333333	0	-1.17617	0.773161	0.952328
328734	'Pisd-ps2'	lncRNA	43.06	49.51	36.65	21.51	33.94	43.62	33.0233	43.0733	988.24	1054.31	874.72	496.81	779.88	888.95	721.88	972.423	35.37	39.04	28.5	17.56	25.96	33.72	25.7467	34.3033	0.22506	0.271821	0.628611
328747	'Gm5091'	lncRNA
328766	'Gm5092'	lncRNA	0	0	0	0	0.07	0	0.0233333	0	0	0	0	0	1	0	0.333333	0	0	0	0	0	0.06	0	0.02	0	-1.17617	0.773161	0.952328
328837	'C330011F03Rik'	lncRNA	0	0	0	0.02	0	0	0.00666667	0	0	0	0	1	0	0	0.333333	0	0	0	0	0.01	0	0	0.00333333	0	-1.17617	0.773161	0.952328
328855	'E330032C10Rik'	lncRNA	0.05	0.05	0.05	0.05	0	0.04	0.03	0.05	3.95	3	5	4.64	0	3.06	2.56667	3.98333	0.04	0.04	0.04	0.04	0	0.03	0.0233333	0.04	0.401333	0.748294	0.952328
328906	'Gm15328'	lncRNA	0.28	0.27	0.29	0.18	0.18	0.05	0.136667	0.28	21	18	19	12	12	3	9	19.3333	0.23	0.21	0.22	0.15	0.14	0.04	0.11	0.22	0.89354	0.146595	0.423049
328919	'Gm38410'	lncRNA
328957	'9330117O12Rik'	lncRNA	0	0	0	0.01	0	0	0.00333333	0	0	0	0	1	0	0	0.333333	0	0	0	0	0.01	0	0	0.00333333	0	-1.17617	0.773161	0.952328
328963	'G630071F17Rik'	lncRNA
328968	'Carmn'	lncRNA	3.03	2.94	3.75	2.06	2.04	2.41	2.17	3.24	107	102	122	71	71	86	76	110.333	2.49	2.31	2.92	1.68	1.56	1.86	1.7	2.57333	0.321329	0.164363	0.454924
329056	'A830019P07Rik'	lncRNA	0.28	0.03	0.11	0.03	0.03	0.47	0.176667	0.14	6	1	5	1	1	3	1.66667	4	0.23	0.02	0.08	0.02	0.02	0.36	0.133333	0.11	1.05192	0.41475	0.792788
329096	'Gm17644'	lncRNA	1.5	1.74	2.21	0.97	1.12	1.2	1.09667	1.81667	160.65	178.21	220.78	106.13	115.79	123.44	115.12	186.547	1.23	1.37	1.72	0.79	0.85	0.93	0.856667	1.44	0.480688	0.016309	0.0846186
329123	'Gm5099'	lncRNA	0.04	0.12	0	0.04	0.1	0.04	0.06	0.0533333	3.11	8.02	0	3	6.83	3.01	4.28	3.71	0.04	0.09	0	0.03	0.07	0.03	0.0433333	0.0433333	-0.321129	0.792356	0.952328
329159	'9130227L01Rik'	lncRNA
329160	'9130024F11Rik'	lncRNA
329217	'Panct2'	lncRNA	0.14	0.17	0.11	0.14	0.15	0.12	0.136667	0.14	10.94	11.14	10.14	15.12	14.69	12.14	13.9833	10.74	0.11	0.13	0.08	0.12	0.11	0.1	0.11	0.106667	-0.619066	0.265621	0.619759
329253	'Gm15850'	lncRNA	0.13	0	0.03	0.01	0.02	0	0.01	0.0533333	3	0	2	1	1	0	0.666667	1.66667	0.1	0	0.03	0.01	0.01	0	0.00666667	0.0433333	1.12452	0.58404	0.922501
329271	'C230024C17Rik'	lncRNA	1.48	1.36	1.7	0.03	0	0	0.01	1.51333	44	38	47	1	0	0	0.333333	43	1.22	1.07	1.32	0.02	0	0	0.00666667	1.20333	6.69296	8.76007e-08	2.85377e-06
329358	'Gm13387'	lncRNA	0.74	0.71	1.18	0.47	0.25	0.67	0.463333	0.876667	9	8	13	6	3	8	5.66667	10	0.61	0.56	0.92	0.38	0.19	0.52	0.363333	0.696667	0.591296	0.426911	0.803924
329387	'C230014O12Rik'	lncRNA	0.08	0.01	0	0.08	0	0	0.0266667	0.03	1	1	0	1	0	0	0.333333	0.666667	0.07	0.01	0	0.07	0	0	0.0233333	0.0266667	0.695295	0.81325	0.952328
329427	'Chn1os3'	lncRNA	3.14	3.27	2.47	0.92	1.86	0.91	1.23	2.96	76.99	65.6	53.19	25.4	40.83	25.01	30.4133	65.26	2.58	2.58	1.92	0.75	1.42	0.7	0.956667	2.36	0.907136	0.00815604	0.0492058
329480	'Wt1os'	lncRNA	0.07	0.69	0.19	0.05	0.05	0.1	0.0666667	0.316667	3	7	9	3	2	6	3.66667	6.33333	0.06	0.54	0.15	0.04	0.04	0.08	0.0533333	0.25	0.555707	0.557014	0.903958
329496	'Gm13986'	lncRNA	0	0	0.02	0	0	0	0	0.00666667	0	0	2	0	0	0	0	0.666667	0	0	0.01	0	0	0	0	0.00333333	1.61198	0.689933	0.952328
329513	'A730036I17Rik'	lncRNA	0.77	0.84	1.02	0.65	0.54	0.59	0.593333	0.876667	74	77	91	63	50	48	53.6667	80.6667	0.64	0.66	0.79	0.53	0.41	0.45	0.463333	0.696667	0.367393	0.17766	0.479468
329514	'Il1bos'	lncRNA	0	0.01	0	0	0	0	0	0.00333333	0	0.58	0	0	0	0	0	0.193333	0	0.01	0	0	0	0	0	0.00333333
329584	'Slc2a4rg-ps'	lncRNA	4.16	3.92	3.4	2.89	2.91	3.07	2.95667	3.82667	153	137	117	110	103	109	107.333	135.667	3.42	3.09	2.65	2.36	2.23	2.37	2.32	3.05333	0.12466	0.571184	0.916204
329623	'Gm11548'	lncRNA
329639	'Gm2447'	lncRNA
329735	'4933431E20Rik'	lncRNA	1.43	1.77	2.37	0.6	2.03	1.62	1.41667	1.85667	124.49	116.73	178.48	66.75	109.35	93.86	89.9867	139.9	1.17	1.39	1.84	0.49	1.56	1.25	1.1	1.46667	0.432526	0.0986674	0.321901
329753	'9830132P13Rik'	lncRNA
329782	'4930570G19Rik'	lncRNA	0	0	0.03	0	0	0.02	0.00666667	0.01	0	0	3	0	0	2	0.666667	1	0	0	0.02	0	0	0.02	0.00666667	0.00666667	0.327115	0.914189	0.975955
329851	'Gm12530'	lncRNA
329970	'Gm13016'	lncRNA
330052	'A930003O13Rik'	lncRNA	0.5	0.24	0.26	0.57	0.4	0.6	0.523333	0.333333	18.72	10	10.21	18	13.32	19.6	16.9733	12.9767	0.41	0.19	0.2	0.47	0.31	0.46	0.413333	0.266667	-0.610406	0.270401	0.626411
330133	'Gm38413'	lncRNA	0.04	0.01	0.03	0.05	0.04	0.07	0.0533333	0.0266667	14.71	6.54	13.9	21.05	16.11	24.97	20.71	11.7167	0.03	0.01	0.03	0.04	0.03	0.05	0.04	0.0233333	-1.10457	0.0456921	0.184485
330164	'C130026L21Rik'	lncRNA
330166	'Miat'	lncRNA	0	0	0.07	0	0.01	0	0.00333333	0.0233333	0	0	4	0	2	0	0.666667	1.33333	0	0	0.06	0	0.01	0	0.00333333	0.02	0.82258	0.778722	0.952328
330183	'Gm16063'	lncRNA	0.22	0.15	0.21	0.05	0.12	0	0.0566667	0.193333	9	6	8	2	5	0	2.33333	7.66667	0.18	0.12	0.16	0.04	0.09	0	0.0433333	0.153333	1.52842	0.149173	0.428149
330324	'6430584L05Rik'	lncRNA	0	0	0.05	0	0.04	0	0.0133333	0.0166667	0	0	1	0	1	0	0.333333	0.333333	0	0	0.04	0	0.03	0	0.01	0.0133333	-0.214388	0.957442	0.975955
330350	'9130221F21Rik'	lncRNA	0	0	0.17	0	0	0	0	0.0566667	0	0	1	0	0	0	0	0.333333	0	0	0.13	0	0	0	0	0.0433333	0.747384	0.854672	0.952328
330385	'9530026P05Rik'	lncRNA	1.99	2.34	3.53	1.82	2.18	2.29	2.09667	2.62	39.5	44.92	67.57	38.06	55.51	50.77	48.1133	50.6633	1.63	1.85	2.74	1.49	1.67	1.77	1.64333	2.07333	-0.144536	0.661129	0.952328
330403	'Gm9946'	lncRNA	0	0	0	0	0.02	0	0.00666667	0	0	0	0	0	1	0	0.333333	0	0	0	0	0	0.01	0	0.00333333	0	-1.17617	0.773161	0.952328
330427	'9330102E08Rik'	lncRNA	0.65	0.23	0.49	0.13	0.08	0.17	0.126667	0.456667	50	21	45	13	7	16	12	38.6667	0.53	0.19	0.38	0.11	0.06	0.13	0.1	0.366667	1.46749	0.00667908	0.0418485
330599	'Gm16938'	lncRNA	0.59	0.69	0.78	0.14	0.15	0.14	0.143333	0.686667	13	14	21.35	14.7	15.91	14.12	14.91	16.1167	0.48	0.54	0.61	0.11	0.12	0.11	0.113333	0.543333	-0.0588115	0.908049	0.975955
330602	'Gm5115'	lncRNA	3.92	3.8	4.11	3.57	3.75	3.46	3.59333	3.94333	142	131	138	133	132	121	128.667	137	3.22	2.99	3.19	2.92	2.87	2.68	2.82333	3.13333	-0.123565	0.517732	0.877752
330677	'Nctc1'	lncRNA	0	0.02	0	0	0	0	0	0.00666667	0	1	0	0	0	0	0	0.333333	0	0.01	0	0	0	0	0	0.00333333	0.747384	0.854672	0.952328
330734	'B930018H19Rik'	lncRNA	0	0.01	0	0.04	0	0	0.0133333	0.00333333	0	1	0	2	0	0	0.666667	0.333333	0	0.01	0	0.03	0	0	0.01	0.00333333	-1.1703	0.732956	0.952328
330737	'5430403N17Rik'	lncRNA
330738	'Gm38414'	lncRNA	0.03	0.12	0.04	0.03	0.05	0.09	0.0566667	0.0633333	1.08	3.83	2	1.16	1.54	2.98	1.89333	2.30333	0.03	0.1	0.03	0.03	0.04	0.07	0.0466667	0.0533333	0.3612	0.805821	0.952328
330767	'1190028D05Rik'	lncRNA	0.02	0	0	0.02	0	0	0.00666667	0.00666667	1.01	0	0	1	0	0	0.333333	0.336667	0.01	0	0	0.01	0	0	0.00333333	0.00333333	-0.214388	0.956135	0.975955
330850	'Gm38416'	lncRNA	0.67	1.44	1.21	1.69	1.49	0.51	1.23	1.10667	25	47	41	61	51	17	43	37.6667	0.55	1.13	0.94	1.38	1.14	0.39	0.97	0.873333	-0.414444	0.401585	0.782384
330902	'Gm16853'	lncRNA	0.07	0.02	0	0	0.1	0.02	0.04	0.03	2	1	0	0	3	1	1.33333	1	0.06	0.02	0	0	0.07	0.02	0.03	0.0266667	-0.564089	0.780705	0.952328
330917	'Gm27162'	lncRNA	0	0	0	0	0.02	0	0.00666667	0	0	0	0	0	1	0	0.333333	0	0	0	0	0	0.01	0	0.00333333	0	-1.17617	0.773161	0.952328
330956	'Gm5122'	lncRNA	0.12	0	0.13	0.91	0.3	0.6	0.603333	0.0833333	2	0	2	17.45	5	13	11.8167	1.33333	0.1	0	0.1	0.74	0.23	0.47	0.48	0.0666667	-3.36593	0.00193434	0.0153138
330958	'A730043L09Rik'	lncRNA	0.08	0.06	0.05	0.08	0.07	0.05	0.0666667	0.0633333	13.01	10.07	9	10.53	11.52	9.03	10.36	10.6933	0.06	0.05	0.04	0.06	0.05	0.04	0.05	0.05	-0.115586	0.848146	0.952328
331003	'4933400C23Rik'	lncRNA
331011	'E330023G01Rik'	lncRNA
331392	'Gm5124'	lncRNA	0	0.04	0	0	0	0.02	0.00666667	0.0133333	0	2	0	0	0	1	0.333333	0.666667	0	0.03	0	0	0	0.02	0.00666667	0.01	0.669614	0.848938	0.952328
331424	'Cdr1os'	lncRNA	0	0	0	0	0	0	0	0	0	1.16	1.26	1	1.17	0	0.723333	0.806667	0	0	0	0	0	0	0	0	-0.225851	0.925483	0.975955
331547	'A230072E10Rik'	lncRNA	0.22	0.19	0.22	0.28	0.18	0.33	0.263333	0.21	17	14	16	22	13	24	19.6667	15.6667	0.18	0.15	0.17	0.23	0.13	0.25	0.203333	0.166667	-0.551801	0.271259	0.627705
331578	'AW822252'	lncRNA	0.02	0.05	0.18	0	0.08	0.01	0.03	0.0833333	1.84	2.74	6.57	0	3	1.01	1.33667	3.71667	0.02	0.04	0.14	0	0.06	0.01	0.0233333	0.0666667	0.976894	0.527645	0.882465
332993	'Gm5129'	lncRNA	0	0	0.55	0.8	0.44	0.41	0.55	0.183333	0	0	1	2	1	1	1.33333	0.333333	0	0	0.43	0.65	0.34	0.32	0.436667	0.143333	-2.12452	0.33501	0.708295
338360	'B430212C06Rik'	lncRNA	1.02	1.04	1.55	0.07	0.63	0.3	0.333333	1.20333	50.79	66	81	5	33	16	18	65.93	0.83	0.82	1.21	0.06	0.49	0.23	0.26	0.953333	1.67807	0.00129271	0.0109672
338535	'E030013I19Rik'	lncRNA	0.03	0.05	0.14	0.01	0.01	0.03	0.0166667	0.0733333	2	3	9	1	1	2	1.33333	4.66667	0.02	0.04	0.11	0.01	0.01	0.02	0.0133333	0.0566667	1.57651	0.220939	0.555536
352968	'D830050J10Rik'	lncRNA	2.89	3.25	3.38	1.93	2	1.61	1.84667	3.17333	88	91	92	64	62	46	57.3333	90.3333	2.37	2.56	2.63	1.58	1.53	1.25	1.45333	2.52	0.44115	0.0850362	0.29092
353109	'Scgb2b23-ps'	lncRNA
353123	'A830036E02Rik'	lncRNA	0.01	0	0	0	0	0	0	0.00333333	1	0	0	0	0	0	0	0.333333	0.01	0	0	0	0	0	0	0.00333333	0.747384	0.854672	0.952328
353373	'Rnu11'	lncRNA
353504	'Dio3os'	lncRNA	1.86	1.9	3.05	0.28	0.57	0.83	0.56	2.27	35	46	51	9	8	13	10	44	1.52	1.5	2.37	0.23	0.43	0.64	0.433333	1.79667	1.91667	2.22539e-05	0.000354467
373852	'4833422C13Rik'	lncRNA	0.05	0.04	0.06	0.02	0.02	0.02	0.02	0.05	6	5	7	3	3	3	3	6	0.04	0.03	0.05	0.02	0.02	0.02	0.02	0.04	0.784924	0.391547	0.772999
378775	'Pcsk2os2'	lncRNA
378776	'Pcsk2os1'	lncRNA
380765	'D830013O20Rik'	lncRNA	0	0	0	0	0.08	0.08	0.0533333	0	0	0	0	0	1	1	0.666667	0	0	0	0	0	0.06	0.06	0.04	0	-2.04168	0.596122	0.923935
380930	'9330188P03Rik'	lncRNA
380934	'AA536875'	lncRNA
380977	'A330009N23Rik'	lncRNA	0.62	0.42	0.57	0.37	0.5	0.38	0.416667	0.536667	29	19	25	18	23	17	19.3333	24.3333	0.51	0.33	0.44	0.3	0.38	0.29	0.323333	0.426667	0.125044	0.775269	0.952328
381002	'Gm5144'	lncRNA	0	0	0	0	0.13	0	0.0433333	0	0	0	0	0	2	0	0.666667	0	0	0	0	0	0.1	0	0.0333333	0	-1.99477	0.621905	0.93646
381033	'Gm1600'	lncRNA	0.39	0.91	0.47	0	0.77	0	0.256667	0.59	1	2	1	0	2	0	0.666667	1.33333	0.32	0.72	0.37	0	0.59	0	0.196667	0.47	0.835374	0.695699	0.952328
381223	'E030044B06Rik'	lncRNA	0.03	0	0.04	0.03	0.04	0	0.0233333	0.0233333	1	0	1	1	1	0	0.666667	0.666667	0.03	0	0.03	0.03	0.03	0	0.02	0.02	-0.20485	0.932276	0.975955
381232	'Mirt1'	lncRNA	0.24	0.8	0.66	0.65	0.41	0.65	0.57	0.566667	15	40	34.78	33	19	28	26.6667	29.9267	0.2	0.63	0.51	0.53	0.31	0.5	0.446667	0.446667	-0.0819367	0.865167	0.957391
381384	'A530006G24Rik'	lncRNA
381452	'Gm1647'	lncRNA	0.24	0.04	0.04	0	0	0	0	0.106667	2	1	1	0	0	0	0	1.33333	0.2	0.03	0.03	0	0	0	0	0.0866667	2.65417	0.31558	0.686047
381482	'Gm1653'	lncRNA	0.01	0.02	0.09	0	0	0	0	0.04	1	1	2	0	0	0	0	1.33333	0.01	0.02	0.07	0	0	0	0	0.0333333	2.63612	0.32033	0.691356
381498	'4930592C13Rik'	lncRNA	0.1	0.14	0.19	0.1	0.14	0.21	0.15	0.143333	3	4	5	3	4	6	4.33333	4	0.08	0.11	0.14	0.08	0.11	0.17	0.12	0.11	-0.332618	0.723221	0.952328
381524	'Mexis'	lncRNA	0.17	0.55	0.18	0.08	0.1	0	0.06	0.3	2	6	2	1	1	0	0.666667	3.33333	0.14	0.44	0.14	0.07	0.08	0	0.05	0.24	2.10693	0.197048	0.514217
381598	'2610005L07Rik'	lncRNA	35.26	38.45	39.27	26.73	32.29	31.81	30.2767	37.66	1414.85	1520.51	1406.71	1133.78	1293.66	1176.53	1201.32	1447.36	28.97	30.31	30.54	21.81	24.7	24.59	23.7	29.94	0.0567391	0.563069	0.90965
381650	'Thap6'	lncRNA	4.46	3.65	4.2	3.71	4.09	3.76	3.85333	4.10333	304	238	260	244.95	262	247	251.317	267.333	3.66	2.88	3.26	3.03	3.12	2.91	3.02	3.26667	-0.119809	0.483027	0.85267
381707	'1700069L16Rik'	lncRNA
381792	'2310040G24Rik'	lncRNA	3.53	4.61	3.99	0.52	1.06	0.6	0.726667	4.04333	44	36	37	7.11	8	6	7.03667	39	2.9	3.63	3.1	0.43	0.81	0.46	0.566667	3.21	2.2687	3.95576e-06	8.06182e-05
381822	'Lockd'	lncRNA	0.38	0.37	0.28	0.28	0.12	0.04	0.146667	0.343333	10	10	13	3	7	3	4.33333	11	0.31	0.29	0.22	0.23	0.09	0.03	0.116667	0.273333	1.14162	0.131281	0.393385
381827	'1700073E17Rik'	lncRNA
381914	'B230311B06Rik'	lncRNA
381967	'Gm26705'	lncRNA
382036	'A530010L16Rik'	lncRNA	0.07	0.12	0.11	0.03	0.02	0.04	0.03	0.1	4	7	6	2	1	2	1.66667	5.66667	0.06	0.1	0.08	0.03	0.01	0.03	0.0233333	0.08	1.53864	0.159493	0.446495
382255	'Gm1720'	lncRNA	0	0.03	0	0	0	0	0	0.01	0	1	0	0	0	0	0	0.333333	0	0.02	0	0	0	0	0	0.00666667	0.747384	0.854672	0.952328
382421	'Gm5176'	lncRNA	0.31	0.13	0.49	0.12	0.32	0.26	0.233333	0.31	17	7	25	7	17	14	12.6667	16.3333	0.25	0.1	0.38	0.1	0.24	0.2	0.18	0.243333	0.164837	0.79714	0.952328
382450	'Gm5177'	lncRNA
383773	'Gm14267'	lncRNA
384864	'Gm1943'	lncRNA
399101	'Snhg3'	lncRNA	44.19	42.08	53.52	92.69	55.28	82.7	76.89	46.5967	420	358	426	932	501	778	737	401.333	36.3	33.17	41.62	75.64	42.28	63.93	60.6167	37.03	-1.1073	9.78452e-06	0.000175581
399570	'Kank4os'	lncRNA
399609	'C130046K22Rik'	lncRNA	2	1.51	1.44	1.8	2.1	1.73	1.87667	1.65	35.94	24.12	22	32.21	34	29.96	32.0567	27.3533	1.65	1.19	1.12	1.47	1.61	1.34	1.47333	1.32	-0.437974	0.262032	0.615037
399626	'C330024C12Rik'	lncRNA
402728	'Pax6os1'	lncRNA
402734	'C730036E19Rik'	lncRNA	94.12	119.67	120.53	26.69	32.43	21.5	26.8733	111.44	8049	9703	9885	2202	2729	1837	2256	9212.33	77.31	94.35	93.72	21.78	24.8	16.62	21.0667	88.46	1.81862	2.82259e-35	3.27028e-32
402757	'9830166K06Rik'	lncRNA
402767	'A830052D11Rik'	lncRNA	1.15	0.85	1.36	0.59	0.27	0.08	0.313333	1.12	13	9	14	7	3	1	3.66667	12	0.94	0.67	1.06	0.48	0.21	0.06	0.25	0.89	1.48382	0.0774863	0.272395
402773	'D030018L15Rik'	lncRNA	0	0	0	0	0.02	0	0.00666667	0	0	0	0	0	2	0	0.666667	0	0	0	0	0	0.01	0	0.00333333	0	-1.99477	0.621905	0.93646
402774	'D030025E07Rik'	lncRNA
403201	'5330416C01Rik'	lncRNA
403202	'A430093F15Rik'	lncRNA	0.13	0	0.05	0	0	0.13	0.0433333	0.06	1	0	1	0	0	2	0.666667	0.666667	0.11	0	0.04	0	0	0.1	0.0333333	0.05	-0.220968	0.935443	0.975955
406222	'Krt74'	lncRNA
407789	'BC048644'	lncRNA	0	0	0.02	0	0	0	0	0.00666667	0	0	1	0	0	0	0	0.333333	0	0	0.02	0	0	0	0	0.00666667	0.747384	0.854672	0.952328
407793	'BC039966'	lncRNA
407803	'BC051226'	lncRNA	3.23	4.61	6.69	2.63	3.16	4.34	3.37667	4.84333	29	40	50	20	23	32	25	39.6667	2.65	3.63	5.21	2.15	2.42	3.35	2.64	3.83	0.446109	0.260174	0.612545
407810	'BC046251'	lncRNA
408028	'Arhgap20os'	lncRNA	0.03	0	0	0	0	0	0	0.01	1	0	0	0	0	0	0	0.333333	0.02	0	0	0	0	0	0	0.00666667	0.747384	0.854672	0.952328
408057	'BC039771'	lncRNA	3.18	3.77	4.12	4.03	6.67	6.28	5.66	3.69	281.02	324.95	338	373	568.91	528.69	490.2	314.657	2.61	2.98	3.2	3.29	5.11	4.86	4.42	2.93	-0.848107	7.60049e-07	1.89288e-05
408064	'BC064078'	lncRNA	0.28	0.27	0.2	0.17	0.26	0.11	0.18	0.25	15.58	14.38	10.21	9.6	13.75	5.57	9.64	13.39	0.23	0.22	0.15	0.14	0.2	0.08	0.14	0.2	0.329399	0.602308	0.926559
414066	'BC037032'	lncRNA	0.02	0.04	0.08	0.01	0.02	0.05	0.0266667	0.0466667	3	4	6	1	2	4	2.33333	4.33333	0.02	0.03	0.06	0.01	0.01	0.04	0.02	0.0366667	0.675259	0.54175	0.892215
414067	'AY512915'	lncRNA	0.01	0.02	0.05	0	0.01	0	0.00333333	0.0266667	1	1	3	0	1	0	0.333333	1.66667	0.01	0.02	0.04	0	0	0	0	0.0233333	1.99249	0.357949	0.733121
414068	'Bach2os'	lncRNA	1.21	2.67	2.55	2.07	1.14	0.72	1.31	2.14333	86	179	121	45	62	50	52.3333	128.667	0.99	2.11	1.98	1.69	0.87	0.55	1.03667	1.69333	1.08384	0.000568743	0.00552932
414072	'BC031361'	lncRNA	0	0	0	0.31	0	0	0.103333	0	0	0	0	1	0	0	0.333333	0	0	0	0	0.25	0	0	0.0833333	0	-1.17617	0.773161	0.952328
414076	'BC051537'	lncRNA	0.03	0.03	0	0	0	0	0	0.02	1	1	0	0	0	0	0	0.666667	0.02	0.02	0	0	0	0	0	0.0133333	1.65927	0.67916	0.952328
414079	'4930405O22Rik'	lncRNA	5.58	7.43	8.31	7.2	10.46	7.12	8.26	7.10667	385	480	488	490	568	452	503.333	451	4.58	5.86	6.46	5.88	8	5.51	6.46333	5.63333	-0.372512	0.00936555	0.0549365
414081	'5330413P13Rik'	lncRNA
414085	'9330151L19Rik'	lncRNA	5.88	7.34	4.78	2.64	3.77	3.43	3.28	6	222	255	203	97	148	114	119.667	226.667	4.83	5.79	3.72	2.16	2.89	2.65	2.56667	4.78	0.715788	0.000477748	0.0047897
414091	'A630001O12Rik'	lncRNA	0.15	0.07	0.1	0.15	0.31	0	0.153333	0.106667	3	1	2	6	7	0	4.33333	2	0.12	0.05	0.07	0.12	0.24	0	0.12	0.08	-1.31226	0.329965	0.702472
414093	'A830082N09Rik'	lncRNA	0.37	0.21	0.44	0.41	0.19	0.19	0.263333	0.34	12	7	13	14	6	6	8.66667	10.6667	0.31	0.17	0.34	0.33	0.15	0.14	0.206667	0.273333	0.0703432	0.919944	0.975955
414094	'Dgkeos'	lncRNA	0	0.07	0.12	0	0	0.04	0.0133333	0.0633333	0	2	1	0	0	2	0.666667	1	0	0.05	0.09	0	0	0.03	0.01	0.0466667	0.342167	0.893369	0.970743
414095	'B130034C11Rik'	lncRNA	2.88	2.66	2.89	1.26	0.96	1.39	1.20333	2.81	83	88.09	87.25	42.45	38	45.7	42.05	86.1133	2.37	2.1	2.24	1.03	0.74	1.07	0.946667	2.23667	0.82852	0.0018628	0.0148575
414101	'E130317F20Rik'	lncRNA	0.83	0.68	0.78	0.41	0.63	0.62	0.553333	0.763333	57	56	56	36	52	51	46.3333	56.3333	0.68	0.54	0.6	0.34	0.48	0.48	0.433333	0.606667	0.073057	0.801716	0.952328
414103	'E230032D23Rik'	lncRNA	0.3	0.31	0.64	0.22	0.23	0.08	0.176667	0.416667	4	3	7	3	3	1	2.33333	4.66667	0.25	0.24	0.5	0.18	0.18	0.06	0.14	0.33	0.783462	0.470686	0.84214
414104	'E330016L19Rik'	lncRNA
414108	'9230114K14Rik'	lncRNA	2.32	1.98	2.68	1.15	1.96	2.89	2	2.32667	353	316	352	217.14	368	313	299.38	340.333	1.91	1.56	2.08	0.94	1.5	2.24	1.56	1.85	-0.0178675	0.925947	0.975955
414114	'D330037F02Rik'	lncRNA	0	0.34	0.05	0.07	0.02	0.01	0.0333333	0.13	0	6	3	4	2	1	2.33333	3	0	0.27	0.04	0.06	0.02	0.01	0.03	0.103333	0.117974	0.93325	0.975955
414115	'D330050I16Rik'	lncRNA	1.81	1.87	1.84	1.19	1.54	2.01	1.58	1.84	53	52	50	36	44	57	45.6667	51.6667	1.49	1.47	1.43	0.97	1.18	1.56	1.23667	1.46333	-0.0342145	0.9123	0.975955
414116	'D630024D03Rik'	lncRNA	0.8	0.61	0.58	0.65	1.01	0.7	0.786667	0.663333	17	15	14	12	19	11	14	15.3333	0.66	0.48	0.45	0.53	0.77	0.54	0.613333	0.53	-0.0716737	0.89079	0.969126
414121	'E430016F16Rik'	lncRNA	0.02	0	0.01	0	0.01	0	0.00333333	0.01	2	0	1	0	1	0	0.333333	1	0.02	0	0.01	0	0.01	0	0.00333333	0.01	1.2841	0.637892	0.94781
414124	'F730035M05Rik'	lncRNA	0.1	0.28	0.29	0.06	0.14	0.17	0.123333	0.223333	3.05	8	8	2	4	5	3.66667	6.35	0.08	0.22	0.22	0.05	0.1	0.13	0.0933333	0.173333	0.571437	0.535998	0.887722
414125	'F930017D23Rik'	lncRNA	0.4	0.35	0.22	0.92	1.3	1.22	1.14667	0.323333	14	18	11	51	68	63	60.6667	14.3333	0.33	0.28	0.17	0.75	0.99	0.94	0.893333	0.26	-2.29065	9.17294e-10	4.6034e-08
414127	'G630055G22Rik'	lncRNA
414128	'G630064G18Rik'	lncRNA	0.02	0	0	0	0	0.03	0.01	0.00666667	1.3	0	0	0	0	2	0.666667	0.433333	0.01	0	0	0	0	0.02	0.00666667	0.00333333	-1.12399	0.743838	0.952328
432396	'Zfp652os'	lncRNA	0.07	0.2	0.11	0	0.14	0.04	0.06	0.126667	4	11	6	0	8	2	3.33333	7	0.06	0.16	0.09	0	0.11	0.03	0.0466667	0.103333	0.896706	0.430467	0.806667
432436	'Gm5420'	lncRNA	0.12	0.13	0.92	0	0	0.12	0.04	0.39	1	1	7	0	0	1	0.333333	3	0.1	0.1	0.72	0	0	0.09	0.03	0.306667	2.8315	0.157827	0.443788
432488	'Gm17745'	lncRNA	0.09	0.09	0.29	0	0	0.18	0.06	0.156667	1	1	3	0	0	2	0.666667	1.66667	0.07	0.07	0.22	0	0	0.14	0.0466667	0.12	1.08716	0.596602	0.924101
432562	'Lyrm7os'	lncRNA
432641	'Gm17746'	lncRNA	0	0.03	0	0	0	0	0	0.01	0	1	0	0	0	0	0	0.333333	0	0.02	0	0	0	0	0	0.00666667	0.747384	0.854672	0.952328
432713	'Gm5441'	lncRNA	0	0	0	0.02	0	0	0.00666667	0	0	0	0	1	0	0	0.333333	0	0	0	0	0.02	0	0	0.00666667	0	-1.17617	0.773161	0.952328
432745	'4930447K03Rik'	lncRNA	0.17	0.06	0.12	0	0.06	0.11	0.0566667	0.116667	1	1	2	0	1	1	0.666667	1.33333	0.14	0.05	0.1	0	0.04	0.08	0.04	0.0966667	0.798372	0.681725	0.952328
432777	'Eprn'	lncRNA	0.05	0.04	0.09	0.08	0.03	0	0.0366667	0.06	2	1	2	2	1	0	1	1.66667	0.04	0.03	0.07	0.06	0.02	0	0.0266667	0.0466667	0.513769	0.764946	0.952328
432812	'BC052688'	lncRNA	0.01	0.03	0.3	0	0.03	0.05	0.0266667	0.113333	1	2	9.9	0	2.23	4	2.07667	4.3	0.01	0.02	0.23	0	0.02	0.04	0.02	0.0866667	0.777703	0.587481	0.923935
432842	'LOC432842'	lncRNA
432939	'Gm48957'	lncRNA	0.1	0.07	0.04	0.12	0.08	0.15	0.116667	0.07	12.67	14.45	7.56	9.83	8.9	15.26	11.33	11.56	0.08	0.06	0.03	0.1	0.06	0.12	0.0933333	0.0566667	-0.171159	0.78867	0.952328
432956	'D030024E09Rik'	lncRNA	0	0	0	0	0	0.04	0.0133333	0	0	0	0	0	0	1	0.333333	0	0	0	0	0	0	0.03	0.01	0	-1.17617	0.773161	0.952328
432958	'Gm20740'	lncRNA	0.1	0.02	0	0.04	0.12	0.18	0.113333	0.04	5.04	1	0	2	6	8.99	5.66333	2.01333	0.08	0.02	0	0.03	0.09	0.14	0.0866667	0.0333333	-1.59189	0.214908	0.545313
432989	'D930007P13Rik'	lncRNA	0.06	0	0	0	0.03	0	0.01	0.02	1	0	0	0	1	0	0.333333	0.333333	0.05	0	0	0	0.03	0	0.01	0.0166667	-0.214388	0.957017	0.975955
433004	'B830017H08Rik'	lncRNA	0	0	0	0.03	0	0	0.01	0	0	0	0	1	0	0	0.333333	0	0	0	0	0.02	0	0	0.00666667	0	-1.17617	0.773161	0.952328
433100	'AA388235'	lncRNA	0	0	0	0	0.06	0	0.02	0	0	0	0	0	0.75	0	0.25	0	0	0	0	0	0.04	0	0.0133333	0
433111	'F630040K05Rik'	lncRNA	0.08	0.01	0.04	0.01	0.07	0.14	0.0733333	0.0433333	1.96	2.01	5.02	2.06	2.59	6.27	3.64	2.99667	0.06	0.01	0.03	0.01	0.06	0.11	0.06	0.0333333	-0.554201	0.644203	0.951223
433171	'Gm10549'	lncRNA	0.15	0	0.08	0.07	0.15	0.3	0.173333	0.0766667	2	0	1	1	2	4	2.33333	1	0.12	0	0.06	0.06	0.12	0.23	0.136667	0.06	-1.42142	0.378894	0.757333
433202	'Gm9925'	lncRNA	0.06	0	0.02	0.02	0.02	0.04	0.0266667	0.0266667	3	0	1	1	1	2	1.33333	1.33333	0.05	0	0.02	0.01	0.01	0.03	0.0166667	0.0233333	-0.19827	0.909551	0.975955
433281	'Gm5524'	lncRNA	15.8	12.75	13.58	3.16	6.35	2.98	4.16333	14.0433	383	293	304	79	150	70	99.6667	326.667	12.98	10.05	10.56	2.58	4.86	2.3	3.24667	11.1967	1.5196	4.92885e-08	1.70799e-06
433347	'Gm28856'	lncRNA	0.04	0.1	0.02	0.21	0.08	0.08	0.123333	0.0533333	2	5	1	11	4	4	6.33333	2.66667	0.03	0.08	0.02	0.17	0.06	0.06	0.0966667	0.0433333	-1.48429	0.1581	0.444267
433367	'Gm5532'	lncRNA	0.2	0.11	0.11	0.17	0.05	0.13	0.116667	0.14	8	4	4	7	2	6	5	5.33333	0.17	0.08	0.08	0.14	0.04	0.1	0.0933333	0.11	-0.132172	0.885669	0.966752
433374	'Gm20743'	lncRNA	0	0	0	0.04	0	0	0.0133333	0	0	0	0	2	0	0	0.666667	0	0	0	0	0.04	0	0	0.0133333	0	-2.13576	0.596345	0.923935
433408	'Gm13375'	lncRNA	1.62	1.07	1.87	0.69	0.77	1.09	0.85	1.52	43	27	46	19	20	28	22.3333	38.6667	1.33	0.84	1.45	0.57	0.59	0.84	0.666667	1.20667	0.577562	0.161327	0.449785
433424	'Zeb2os'	lncRNA	0.27	0.1	0.29	0	0.35	0.18	0.176667	0.22	3	1	2	0	3	2	1.66667	2	0.22	0.08	0.22	0	0.27	0.14	0.136667	0.173333	0.0865993	0.954719	0.975955
433426	'Gm13490'	lncRNA	0.02	0.02	0	0	0	0	0	0.0133333	1	1	0	0	0	0	0	0.666667	0.01	0.01	0	0	0	0	0	0.00666667	1.65927	0.67916	0.952328
433456	'4631405J19Rik'	lncRNA	0	0.01	0	0	0.01	0.05	0.02	0.00333333	0	1	0	0	1	1	0.666667	0.333333	0	0.01	0	0	0.01	0.04	0.0166667	0.00333333	-1.08365	0.712137	0.952328
433481	'Gm5535'	lncRNA
433520	'Gm14403'	lncRNA	11.47	10.7	14.34	7.87	6.42	8.42	7.57	12.17	1135.18	1013.47	1323.79	795.82	615.01	797.42	736.083	1157.48	9.42	8.44	11.15	6.43	4.91	6.51	5.95	9.67	0.429783	0.0164184	0.0849878
433637	'Gm5547'	lncRNA	0	0.43	0.16	0.13	0	0.08	0.07	0.196667	0	4	1	1	0	1	0.666667	1.66667	0	0.34	0.12	0.11	0	0.06	0.0566667	0.153333	1.06626	0.613492	0.93206
433855	'AI506816'	lncRNA	1.22	2.43	4.53	1.74	1.99	2.56	2.09667	2.72667	78.9	157.69	286.37	122.41	103.8	164.03	130.08	174.32	1	1.92	3.52	1.42	1.52	1.98	1.64	2.14667	0.184723	0.646361	0.952328
433944	'Tbx3os2'	lncRNA	0.14	0	0	0.12	0	0	0.04	0.0466667	1	0	0	2	0	0	0.666667	0.333333	0.12	0	0	0.1	0	0	0.0333333	0.04	-1.17019	0.731886	0.952328
433945	'Gm5563'	lncRNA
433966	'Mm2pr'	lncRNA	0.77	0.8	0.83	0.48	0.79	0.6	0.623333	0.8	51	69	71	44	52	35	43.6667	63.6667	0.63	0.63	0.65	0.39	0.61	0.47	0.49	0.636667	0.329837	0.272368	0.629329
434003	'Gm13848'	lncRNA
434019	'Gm5570'	lncRNA	0	0	0	0.02	0	0	0.00666667	0	0	0	0	1	0	0	0.333333	0	0	0	0	0.01	0	0	0.00333333	0	-1.17617	0.773161	0.952328
434064	'Gm5577'	lncRNA	0.21	0.26	0.07	0.32	0.31	0.44	0.356667	0.18	4	5	1	6	5	7	6	3.33333	0.17	0.2	0.05	0.26	0.24	0.34	0.28	0.14	-1.06168	0.262335	0.615433
434198	'B130024G19Rik'	lncRNA	0.99	1.52	2.9	0.88	1.07	0.89	0.946667	1.80333	76	104	156	63	65	68	65.3333	112	0.81	1.2	2.26	0.72	0.82	0.69	0.743333	1.42333	0.554666	0.0644018	0.238127
434280	'Sox1ot'	lncRNA	0.01	0.02	0.01	0.04	0.01	0.01	0.02	0.0133333	2.37	2.78	1.35	3	1	1	1.66667	2.16667	0.01	0.02	0.01	0.03	0.01	0.01	0.0166667	0.0133333	-0.228059	0.876195	0.961571
434285	'BB014433'	lncRNA
434310	'AY512931'	lncRNA	0.22	0.23	0.26	0	0.02	0	0.00666667	0.236667	3.29	1.94	2	0	1.06	0	0.353333	2.41	0.18	0.18	0.2	0	0.01	0	0.00333333	0.186667	2.27528	0.266553	0.620722
434350	'9430091E24Rik'	lncRNA	1.75	2.17	2.17	1.48	1.83	1.55	1.62	2.03	90.01	104.89	105.63	80	90.02	77	82.34	100.177	1.44	1.71	1.69	1.2	1.4	1.2	1.26667	1.61333	0.0616951	0.777626	0.952328
434353	'A330074K22Rik'	lncRNA
434412	'Gm20745'	lncRNA
434510	'Gm5627'	lncRNA	0	0	0	0.02	0	0.05	0.0233333	0	0	0	0	1	0	2	1	0	0	0	0	0.02	0	0.04	0.02	0	-2.68786	0.414742	0.792788
436230	'BC065397'	lncRNA	3.32	4.95	5.71	3.9	2.54	5.32	3.92	4.66	46	75	72	60	44	58	54	64.3333	2.73	3.9	4.44	3.19	1.94	4.11	3.08	3.69	0.0257652	0.935157	0.975955
442820	'D830005E20Rik'	lncRNA
442821	'9330175M20Rik'	lncRNA
442837	'C230029F24Rik'	lncRNA
442847	'Platr7'	lncRNA
446210	'AY702103'	lncRNA
474332	'Dnm3os'	lncRNA	0.57	1.2	1.27	0.58	0.49	0.56	0.543333	1.01333	9	21	22	10	11	8	9.66667	17.3333	0.47	0.95	0.99	0.47	0.37	0.43	0.423333	0.803333	0.621209	0.294694	0.661726
52285	'D6Ertd474e'	lncRNA	0	0.09	0	0	0	0	0	0.03	0	2	0	0	0	0	0	0.666667	0	0.07	0	0	0	0	0	0.0233333	1.63075	0.686389	0.952328
52401	'D5Ertd615e'	lncRNA	0.31	0.55	0.53	0.3	0.6	0.32	0.406667	0.463333	14.58	24.64	17.2	14.34	27.08	14.29	18.57	18.8067	0.26	0.44	0.41	0.24	0.46	0.25	0.316667	0.37	-0.203268	0.688198	0.952328
52480	'Snhg14'	lncRNA	11.96	12.41	13.76	9.69	10.15	10.87	10.2367	12.71	352.75	335.24	379.22	282.72	306.25	322.36	303.777	355.737	9.82	9.78	10.7	7.91	7.76	8.41	8.02667	10.1	0.0140442	0.920995	0.975955
52645	'D16Ertd519e'	lncRNA	0.11	0	0	0	0	0	0	0.0366667	1	0	0	0	0	0	0	0.333333	0.09	0	0	0	0	0	0	0.03	0.747384	0.854672	0.952328
544752	'Tug1'	lncRNA	52.76	41.21	39.78	37.11	46.4	29.66	37.7233	44.5833	2244	2017	2214	2173	2047	2119	2113	2158.33	43.34	32.49	30.93	30.29	35.49	22.93	29.57	35.5867	-0.185633	0.118926	0.367607
545180	'Gm21859'	lncRNA
545207	'E130008D07Rik'	lncRNA	0	0	0	0.06	0	0.02	0.0266667	0	1	0	0	2	0	1	1	0.333333	0	0	0	0.05	0	0.01	0.02	0	-1.7379	0.511518	0.876295
545261	'Bvht'	lncRNA	0.7	2.01	1.23	0.64	1.23	0.66	0.843333	1.31333	17.3	28.4	21.93	16.01	20.01	19.01	18.3433	22.5433	0.58	1.58	0.96	0.52	0.94	0.51	0.656667	1.04	0.0488154	0.913691	0.975955
545280	'A630010A05Rik'	lncRNA	0.03	0	0	0	0	0	0	0.01	1	0	0	0	0	0	0	0.333333	0.02	0	0	0	0	0	0	0.00666667	0.747384	0.854672	0.952328
545363	'Gm5833'	lncRNA
545539	'Gm15417'	lncRNA	10.31	8.19	7.85	7.68	10.34	7.51	8.51	8.78333	69	60	52	63	79	63	68.3333	60.3333	8.47	6.45	6.1	6.27	7.91	5.81	6.66333	7.00667	-0.386694	0.152664	0.434451
545605	'Gm5859'	lncRNA	2.09	4.54	3.12	4.82	2.21	5.51	4.18	3.25	285.64	592.62	396.74	670.9	291.2	718.06	560.053	425	1.72	3.58	2.42	3.94	1.69	4.26	3.29667	2.57333	-0.641175	0.0709026	0.255845
545641	'Gm5860'	lncRNA	0	0	0.03	0	0	0.01	0.00333333	0.01	0	0	2.44	0	0	1	0.333333	0.813333	0	0	0.03	0	0	0.01	0.00333333	0.01	0.651755	0.853274	0.952328
545681	'Gm12992'	lncRNA	0.07	0.18	0.07	0.32	0.29	0.06	0.223333	0.106667	3	6	3	12	8	2	7.33333	4	0.06	0.14	0.06	0.26	0.22	0.05	0.176667	0.0866667	-1.09881	0.245294	0.590424
545809	'Gm29681'	lncRNA
545936	'Gm5893'	lncRNA
545951	'Gm28453'	lncRNA	0.03	0	0.03	0.03	0	0	0.01	0.02	1	0	1	1	0	0	0.333333	0.666667	0.02	0	0.02	0.02	0	0	0.00666667	0.0133333	0.687288	0.815535	0.952328
546036	'Gm5907'	lncRNA
546058	'AA386476'	lncRNA	0.44	0.84	1.03	0.71	1.09	0.99	0.93	0.77	17.77	32.55	38.75	29.64	43	38.62	37.0867	29.69	0.36	0.67	0.8	0.58	0.84	0.77	0.73	0.61	-0.553834	0.168458	0.46284
546546	'Serpina3h'	lncRNA	0.9	1.13	1.16	0.75	0.7	0.65	0.7	1.06333	27.07	36	40.01	27	21	21.1	23.0333	34.36	0.74	0.89	0.9	0.61	0.53	0.5	0.546667	0.843333	0.355185	0.364655	0.740425
547127	'Tmem181b-ps'	lncRNA	0.28	0.23	0.44	0.34	0.39	0.36	0.363333	0.316667	9	7	13	11	12	11	11.3333	9.66667	0.23	0.18	0.34	0.27	0.3	0.28	0.283333	0.25	-0.444991	0.462962	0.833807
547150	'6820431F20Rik'	lncRNA	41.95	43.54	53.75	39.78	43.1	40.81	41.23	46.4133	3076.13	3211.42	3777.96	3030.96	3199.28	2903.54	3044.59	3355.17	34.45	34.33	41.79	32.46	32.96	31.55	32.3233	36.8567	-0.0760284	0.482036	0.851794
547334	'Fhitos'	lncRNA
552913	'Gm14634'	lncRNA	0.06	0.1	0.03	0.07	0.03	0.06	0.0533333	0.0633333	4	7	1	2	2	4	2.66667	4	0.05	0.08	0.02	0.06	0.02	0.05	0.0433333	0.05	0.37169	0.747305	0.952328
553095	'Gm17750'	lncRNA
574519	'Vax2os'	lncRNA	0.01	0	0	0	0	0	0	0.00333333	1	0	0	0	0	0	0	0.333333	0.01	0	0	0	0	0	0	0.00333333	0.747384	0.854672	0.952328
57866	'AA545190'	lncRNA
58894	'Zfp862-ps'	lncRNA	1.43	1.04	0.89	0.97	1.97	1.29	1.41	1.12	27.07	33	25	29	32.12	22	27.7067	28.3567	1.18	0.82	0.69	0.79	1.51	1	1.1	0.896667	-0.177475	0.645903	0.952246
594843	'Has2os'	lncRNA
606497	'Otx2os1'	lncRNA
606735	'A330069E16Rik'	lncRNA	0.48	0.29	0.29	0.21	0.33	0.39	0.31	0.353333	9	5	5.08	4	6	7	5.66667	6.36	0.4	0.22	0.23	0.17	0.25	0.3	0.24	0.283333	-0.0423659	0.95806	0.976082
606736	'C920009B18Rik'	lncRNA	5.9	5.77	5.84	3.78	4.53	6.34	4.88333	5.83667	140.81	139.37	132.11	91.98	100.3	145.13	112.47	137.43	4.85	4.55	4.54	3.08	3.47	4.9	3.81667	4.64667	0.0761857	0.753548	0.952328
613254	'AA465934'	lncRNA	1.86	3.72	1.89	2.41	1.16	2.07	1.88	2.49	38	53	45	49	28.12	43.89	40.3367	45.3333	1.53	2.94	1.47	1.97	0.89	1.6	1.48667	1.98	-0.0478768	0.894977	0.971104
613258	'A730017L22Rik'	lncRNA	16.5	18.3	16.87	9.5	13.25	14.57	12.44	17.2233	1009.56	993.81	984.57	600.33	833.34	867.24	766.97	995.98	13.55	14.43	13.12	7.75	10.14	11.27	9.72	13.7	0.16828	0.263138	0.616611
619295	'Lrp8os2'	lncRNA	0	0.01	0	0	0	0	0	0.00333333	0	1	0	0	0	0	0	0.333333	0	0.01	0	0	0	0	0	0.00333333	0.747384	0.854672	0.952328
619299	'9230020A06Rik'	lncRNA
619300	'6430553K19Rik'	lncRNA	0	0	0	0.04	0	0	0.0133333	0	0	0	0	1	0	0	0.333333	0	0	0	0	0.04	0	0	0.0133333	0	-1.17617	0.773161	0.952328
619308	'F830208F22Rik'	lncRNA	0.05	0.04	0.03	0.01	0.03	0.03	0.0233333	0.04	4	3	2	1	2	2	1.66667	3	0.04	0.03	0.02	0.01	0.02	0.02	0.0166667	0.03	0.647874	0.607194	0.927923
619312	'G730013B05Rik'	lncRNA	0.08	0.08	0.11	0.03	0.07	0.04	0.0466667	0.09	6	3	7	2	5	2.08	3.02667	5.33333	0.06	0.06	0.08	0.02	0.05	0.03	0.0333333	0.0666667	0.633196	0.526181	0.881461
619313	'I730030J21Rik'	lncRNA	0.11	0.14	0.12	0	0.11	0.1	0.07	0.123333	6	7	6	0	6	5	3.66667	6.33333	0.09	0.11	0.09	0	0.09	0.07	0.0533333	0.0966667	0.600876	0.559869	0.906341
619321	'9530052E02Rik'	lncRNA	0.02	0.03	0.03	0.05	0	0.1	0.05	0.0266667	1	2	1	3	0	6	3	1.33333	0.01	0.03	0.02	0.04	0	0.08	0.04	0.02	-1.41411	0.355808	0.730701
619327	'G630093K05Rik'	lncRNA
619328	'I730028E13Rik'	lncRNA
619715	'Gm6093'	lncRNA	0.02	0	0.02	0	0.02	0.02	0.0133333	0.0133333	1	0	1	0	1	1	0.666667	0.666667	0.02	0	0.02	0	0.02	0.02	0.0133333	0.0133333	-0.186517	0.938441	0.975955
619719	'6430590A07Rik'	lncRNA	5.49	5.92	5.03	3.23	4.17	2.85	3.41667	5.48	159.72	173.67	168.46	122.09	145.89	112.58	126.853	167.283	4.51	4.67	3.91	2.64	3.19	2.2	2.67667	4.36333	0.188206	0.308019	0.678074
619945	'Gm6116'	lncRNA
620079	'Gm17751'	lncRNA
620760	'2900079G21Rik'	lncRNA
620858	'Gm13539'	lncRNA
620966	'Gm6194'	lncRNA	0.16	0.17	0.09	0	0.41	0.41	0.273333	0.14	2	2	1	0	5	5	3.33333	1.66667	0.13	0.14	0.07	0	0.31	0.32	0.21	0.113333	-1.18239	0.404243	0.785436
621335	'Gm6213'	lncRNA
621427	'Gm10244'	lncRNA	0	0	0.17	0	0.3	0	0.1	0.0566667	0	0	1	0	2	0	0.666667	0.333333	0	0	0.13	0	0.23	0	0.0766667	0.0433333	-1.03702	0.767463	0.952328
621677	'Gm6249'	lncRNA
621809	'Gm6260'	lncRNA
621875	'A530040E14Rik'	lncRNA	0.18	0.56	0.49	0.46	0.26	0.45	0.39	0.41	4.36	5.19	8	2	2	3	2.33333	5.85	0.15	0.44	0.38	0.37	0.2	0.35	0.306667	0.323333	1.05808	0.294605	0.661726
621998	'Gm6277'	lncRNA	0.07	0.07	0.05	0.06	0.1	0	0.0533333	0.0633333	3	4	3	4	6	0	3.33333	3.33333	0.06	0.05	0.04	0.05	0.07	0	0.04	0.05	-0.198542	0.870503	0.959393
622037	'B930092H01Rik'	lncRNA
622070	'Gm15133'	lncRNA	0	0	0.06	0.12	0.12	0.25	0.163333	0.02	0	0	1	1	2	2	1.66667	0.333333	0	0	0.05	0.1	0.09	0.19	0.126667	0.0166667	-2.42203	0.243813	0.587907
622124	'Gm20750'	lncRNA
622167	'Gm12718'	lncRNA	1.44	2.15	0.49	0.84	0.45	0.67	0.653333	1.36	13	18	4	8	4	6	6	11.6667	1.18	1.69	0.38	0.69	0.34	0.52	0.516667	1.08333	0.738485	0.353316	0.72779
622208	'Gm6297'	lncRNA	1.04	1.11	0.77	0.42	0.68	0.85	0.65	0.973333	59	64	42	25	38	46	36.3333	55	0.85	0.88	0.6	0.34	0.52	0.65	0.503333	0.776667	0.391356	0.274291	0.631909
622229	'Gm6300'	lncRNA	1.16	1.07	1.08	0.84	1.02	0.94	0.933333	1.10333	462.99	411.44	402.03	343.87	395.62	359.41	366.3	425.487	0.95	0.85	0.84	0.69	0.78	0.73	0.733333	0.88	0.00703513	0.960422	0.977404
622319	'Gm6313'	lncRNA	0.26	0.26	0.24	0.25	0.16	0.19	0.2	0.253333	17.34	17.5	15.4	16.75	10.06	12.33	13.0467	16.7467	0.22	0.21	0.19	0.2	0.12	0.14	0.153333	0.206667	0.14548	0.782709	0.952328
622459	'Gm12216'	lncRNA	0.77	0.55	0.28	0.12	0.39	0.51	0.34	0.533333	6	4	2	1	3	4	2.66667	4	0.63	0.44	0.22	0.1	0.3	0.39	0.263333	0.43	0.390446	0.72645	0.952328
622552	'Gm20751'	lncRNA
623312	'Gm6416'	lncRNA
623849	'Gm6455'	lncRNA
624549	'Gm29683'	lncRNA	0.58	1.67	0.8	0.56	0.71	0.93	0.733333	1.01667	39.05	57.19	52.39	27.13	31.9	32.1	30.3767	49.5433	0.48	1.32	0.62	0.45	0.54	0.72	0.57	0.806667	0.501357	0.132647	0.395792
624582	'Morf4l1-ps1'	lncRNA	0.83	0.77	0.68	0.4	1.06	0.43	0.63	0.76	16	14	12	8	20	8	12	14	0.68	0.61	0.53	0.33	0.81	0.33	0.49	0.606667	0.0310213	0.958869	0.976561
624759	'Gm20752'	lncRNA
624936	'Pou5f1-rs8'	lncRNA
625018	'C4a'	lncRNA	151.01	201.52	69.97	120.36	142.78	101.26	121.467	140.833	5465.38	5580.57	1708.3	4145.93	5011.33	3452.4	4203.22	4251.42	124.05	158.88	54.41	98.23	109.21	78.28	95.24	112.447	-0.181619	0.734541	0.952328
625167	'Gm6559'	lncRNA	0	0	0.03	0	0	0	0	0.01	0	0	1	0	0	0	0	0.333333	0	0	0.02	0	0	0	0	0.00666667	0.747384	0.854672	0.952328
625175	'1700028E10Rik'	lncRNA	2.05	0.5	1.54	0.71	1.61	0.63	0.983333	1.36333	44.03	10.88	29.02	17.42	31.58	15.4	21.4667	27.9767	1.69	0.39	1.2	0.58	1.23	0.49	0.766667	1.09333	0.209971	0.723201	0.952328
625243	'Gm6567'	lncRNA
625347	'Gm6578'	lncRNA	0.02	0.02	0.02	0.02	0.02	0.01	0.0166667	0.02	5	5.94	6	6.83	4.96	3.04	4.94333	5.64667	0.01	0.02	0.02	0.02	0.01	0.01	0.0133333	0.0166667	0.0775747	0.929421	0.975955
625585	'Gm6602'	lncRNA	0.16	0.06	0.16	0.28	0.06	0.4	0.246667	0.126667	5.2	1.91	4.89	9.29	2.04	12.41	7.91333	4	0.13	0.05	0.13	0.23	0.05	0.31	0.196667	0.103333	-1.43397	0.15904	0.446068
625603	'Gm6607'	lncRNA	0	0	0.13	0	0	0	0	0.0433333	0	0	1	0	0	0	0	0.333333	0	0	0.1	0	0	0	0	0.0333333	0.747384	0.854672	0.952328
625785	'Gm6623'	lncRNA
625901	'Gm6634'	lncRNA	1.13	0.87	1.26	1.71	1.17	1.47	1.45	1.08667	80.35	59.63	83.67	124.87	81.05	100.42	102.113	74.55	0.93	0.69	0.98	1.4	0.9	1.14	1.14667	0.866667	-0.682044	0.018375	0.0927206
625963	'Gm6639'	lncRNA
626009	'Gm6644'	lncRNA	0.69	0.83	0.88	0.69	0.51	0.46	0.553333	0.8	93	108	111	96	67	60	74.3333	104	0.56	0.66	0.68	0.57	0.39	0.36	0.44	0.633333	0.260492	0.341598	0.715131
626049	'Gm20753'	lncRNA
626058	'E330020D12Rik'	lncRNA	0.16	0.28	0.25	0.27	0.2	0.22	0.23	0.23	9	15.23	11.16	13.23	9.25	11.49	11.3233	11.7967	0.13	0.22	0.19	0.22	0.15	0.17	0.18	0.18	-0.139131	0.814354	0.952328
626082	'Gm20754'	lncRNA	2.25	2.6	2.35	1.8	2.78	1.88	2.15333	2.4	66.21	72.12	60.84	58.98	79.42	57.04	65.1467	66.39	1.85	2.05	1.83	1.47	2.13	1.45	1.68333	1.91	-0.178146	0.502164	0.870579
626275	'A930012L18Rik'	lncRNA	0.17	0.03	0.19	0.26	0.64	0.08	0.326667	0.13	6	1	8	3	3	5	3.66667	5	0.14	0.02	0.15	0.21	0.49	0.06	0.253333	0.103333	0.230899	0.824106	0.952328
626410	'Gm20755'	lncRNA
626419	'Gm11981'	lncRNA
626904	'Gm20756'	lncRNA
627268	'Gm15232'	lncRNA	0	0.03	0.03	0.05	0	0	0.0166667	0.02	0	1	1	2	0	0	0.666667	0.666667	0	0.02	0.02	0.04	0	0	0.0133333	0.0133333	-0.285342	0.916511	0.975955
627782	'Gm6787'	lncRNA	0.18	0.13	0.07	0	0.12	0.12	0.08	0.126667	3	2	1	0	2	2	1.33333	2	0.15	0.1	0.05	0	0.09	0.1	0.0633333	0.1	0.402703	0.798134	0.952328
627800	'Gm20757'	lncRNA
628004	'Gm10561'	lncRNA	0.04	0.09	0.02	0.02	0.04	0.02	0.0266667	0.05	2	4	1	1	2	1	1.33333	2.33333	0.03	0.07	0.02	0.02	0.03	0.02	0.0233333	0.04	0.60589	0.674738	0.952328
628062	'Gm29684'	lncRNA	0	0	0	0.2	0	0	0.0666667	0	0	0	0	3	0	0	1	0	0	0	0	0.16	0	0	0.0533333	0	-2.72352	0.494947	0.863698
628686	'D030068K23Rik'	lncRNA	0.12	0.13	0	0.11	0.08	0.15	0.113333	0.0833333	3.94	4	0	3.8	2.53	4.85	3.72667	2.64667	0.1	0.1	0	0.09	0.06	0.12	0.09	0.0666667	-0.576929	0.658603	0.952328
628951	'Gm6936'	lncRNA
629024	'Gm6938'	lncRNA
629091	'Gm29686'	lncRNA
629141	'Gm9999'	lncRNA
629206	'Gm20758'	lncRNA
629300	'Gm6961'	lncRNA	0.12	0.25	0.13	0.19	0.19	0.19	0.19	0.166667	4.17	8.33	4.27	7.03	6.5	5.69	6.40667	5.59	0.1	0.2	0.1	0.16	0.15	0.15	0.153333	0.133333	-0.388996	0.636171	0.946887
629557	'Gm6981'	lncRNA	0.19	0.07	0	0.06	0	0.07	0.0433333	0.0866667	3	1	0	1	0	1	0.666667	1.33333	0.16	0.05	0	0.05	0	0.05	0.0333333	0.07	0.784533	0.716762	0.952328
629678	'Gm6994'	lncRNA
629746	'Gm29688'	lncRNA
629750	'Gm11517'	lncRNA	0.58	0.6	0.8	0.75	0.75	0.67	0.723333	0.66	47	46.2	60	61.77	58.41	52.01	57.3967	51.0667	0.48	0.47	0.62	0.61	0.57	0.52	0.566667	0.523333	-0.377801	0.185613	0.493586
629777	'Zfp335os'	lncRNA	0.95	1.33	0.67	1.58	1.29	1.14	1.33667	0.983333	20	28	18	37	30	24	30.3333	22	0.78	1.05	0.52	1.29	0.99	0.88	1.05333	0.783333	-0.682131	0.105467	0.336707
629820	'Gm7008'	lncRNA	0.28	0.36	0.24	0.06	0.29	0.26	0.203333	0.293333	9	11	7	2	9	8	6.33333	9	0.23	0.28	0.18	0.05	0.22	0.2	0.156667	0.23	0.311625	0.68777	0.952328
630499	'H2-K2'	lncRNA	6.04	6.02	4.86	5.98	3.98	3.84	4.6	5.64	128.06	120.87	94.94	131.15	82.34	79.04	97.51	114.623	4.96	4.74	3.78	4.88	3.05	2.97	3.63333	4.49333	0.00614893	0.983553	0.990317
631105	'Gm7056'	lncRNA
633395	'Gm10548'	lncRNA
633947	'Gm6225'	lncRNA	0.51	0.58	0.5	0.4	0.46	0.48	0.446667	0.53	94	103	86	75	82	85	80.6667	94.3333	0.42	0.46	0.39	0.33	0.35	0.37	0.35	0.423333	0.0127444	0.955424	0.975955
635504	'Gm7160'	lncRNA	5.51	5.9	5	3.66	5.69	7.13	5.49333	5.47	147	160	124	105	153	185	147.667	143.667	4.53	4.65	3.89	2.99	4.35	5.51	4.28333	4.35667	-0.247737	0.319673	0.691353
636791	'Gm9866'	lncRNA
638247	'9530082P21Rik'	lncRNA	1.56	1.29	1.2	0.8	0.76	0.72	0.76	1.35	141	117	107	78	85	63	75.3333	121.667	1.28	1.02	0.93	0.65	0.58	0.56	0.596667	1.07667	0.482987	0.049851	0.197126
63830	'Kcnq1ot1'	lncRNA	6.73	6.22	10.55	7.95	4.37	3.74	5.35333	7.83333	365	407	406	389	414	297	366.667	392.667	5.53	4.91	8.21	6.49	3.34	2.89	4.24	6.21667	-0.115031	0.480055	0.850056
639545	'Gm7271'	lncRNA
639658	'Gm13807'	lncRNA
641454	'5830444B04Rik'	lncRNA	0.91	0.24	0.26	0.17	0.12	0.06	0.116667	0.47	34	23	10	16	9	5	10	22.3333	0.75	0.19	0.2	0.14	0.09	0.05	0.0933333	0.38	0.94676	0.162974	0.452608
653030	'Arhgap27os3'	lncRNA	0.06	0.01	0.09	0	0.04	0.04	0.0266667	0.0533333	4	1	6	0	3	3	2	3.66667	0.05	0.01	0.07	0	0.03	0.03	0.02	0.0433333	0.681695	0.61478	0.932855
654318	'C530005A16Rik'	lncRNA	0.37	0.49	0.4	0.5	0.37	0.37	0.413333	0.42	22.06	28	22	30	21	21	24	24.02	0.31	0.39	0.31	0.41	0.28	0.28	0.323333	0.336667	-0.221789	0.600902	0.926559
654409	'Stk35os1'	lncRNA	0.37	0.36	0.44	0.24	0.59	0.36	0.396667	0.39	23	21	27	16	31	18	21.6667	23.6667	0.3	0.28	0.34	0.2	0.45	0.28	0.31	0.306667	-0.0748955	0.865899	0.957391
654424	'Mccc1os'	lncRNA	0.16	0.11	0.32	0.29	0.09	0.1	0.16	0.196667	23.06	17	28.96	29	17.03	20.09	22.04	23.0067	0.13	0.09	0.25	0.23	0.07	0.08	0.126667	0.156667	-0.182656	0.694294	0.952328
654440	'A430046D13Rik'	lncRNA	6.22	7.74	7.53	5.54	9.85	6.09	7.16	7.16333	160	178.26	173	150.34	272.65	153.59	192.193	170.42	5.11	6.11	5.85	4.52	7.54	4.71	5.59	5.69	-0.370305	0.12222	0.374273
654452	'Defa-ps12'	lncRNA
654454	'Defb44-ps'	lncRNA
654455	'Gm21944'	lncRNA	0.01	0	0	0.01	0	0.01	0.00666667	0.00333333	1.04	0	0	1.02	0	1.02	0.68	0.346667	0.01	0	0	0.01	0	0.01	0.00666667	0.00333333	-1.14386	0.693379	0.952328
654469	'Gm17753'	lncRNA	11.63	9.92	9.34	7.21	10.83	10.92	9.65333	10.2967	397	333	299.01	245	353.22	351	316.407	343.003	9.55	7.82	7.26	5.88	8.28	8.44	7.53333	8.21	-0.0871195	0.659752	0.952328
654796	'9530036O11Rik'	lncRNA	0.45	0.34	0.38	0.05	0.17	0.07	0.0966667	0.39	11	8	8	2	4.27	1	2.42333	9	0.37	0.27	0.29	0.04	0.13	0.05	0.0733333	0.31	1.7504	0.0595082	0.225284
654800	'A730085K08Rik'	lncRNA
654802	'1700105P06Rik'	lncRNA
654804	'4732471J01Rik'	lncRNA	8.61	8.74	6.07	3.22	6.47	4.2	4.63	7.80667	289	271	211	147	201	144	164	257	7.07	6.89	4.72	2.63	4.95	3.25	3.61	6.22667	0.444573	0.0348696	0.150845
654805	'F930015N05Rik'	lncRNA	0	0	0.26	0	0	0	0	0.0866667	0	0	1	0	0	0	0	0.333333	0	0	0.2	0	0	0	0	0.0666667	0.747384	0.854672	0.952328
654809	'4930428O21Rik'	lncRNA
654810	'Appbp2os'	lncRNA	0.5	0.66	0.49	1.27	0.87	0.59	0.91	0.55	4	7	5	11	8	5	8	5.33333	0.41	0.52	0.38	1.03	0.66	0.46	0.716667	0.436667	-0.80778	0.299587	0.667787
654820	'G530011O06Rik'	lncRNA	1.8	2.69	2.61	5.3	1.89	2.58	3.25667	2.36667	84.29	116	86	316	103	108.98	175.993	95.43	1.48	2.12	2.03	4.33	1.45	1.99	2.59	1.87667	-1.12714	0.00975084	0.0565665
654822	'D330041H03Rik'	lncRNA	2.56	2.82	3.39	1.28	1.68	1.39	1.45	2.92333	111	116	137	55	74	61	63.3333	121.333	2.1	2.22	2.63	1.05	1.28	1.08	1.13667	2.31667	0.726538	0.00161213	0.0131739
66123	'1110006O24Rik'	lncRNA	0.52	0.38	0.34	0.05	0.21	0.32	0.193333	0.413333	10	7	6	1	4	6	3.66667	7.66667	0.43	0.3	0.26	0.04	0.16	0.25	0.15	0.33	0.865809	0.339221	0.713139
66263	'1810014B01Rik'	lncRNA	1.83	1.3	2.15	2.25	2.38	1.91	2.18	1.76	73	49	79	93	93	74	86.6667	67	1.5	1.02	1.67	1.83	1.82	1.48	1.71	1.39667	-0.58497	0.0369619	0.157745
66293	'Snhg16'	lncRNA	3.82	3.63	7.6	2.64	4.77	2.54	3.31667	5.01667	86	78	156	69	100	60	76.3333	106.667	3.14	2.86	5.91	2.16	3.65	1.96	2.59	3.97	0.271587	0.409537	0.789188
66297	'Pantr1'	lncRNA
66334	'1700025K04Rik'	lncRNA
66391	'Zbtb11os1'	lncRNA	2.36	3.49	3.05	1.5	2.73	2.99	2.40667	2.96667	71	101	86	47	81	88	72	86	1.94	2.75	2.37	1.22	2.09	2.31	1.87333	2.35333	0.0468878	0.874009	0.960832
66456	'2810001G20Rik'	lncRNA	1.42	1.63	1.49	1.33	1.53	1.84	1.56667	1.51333	33	36	32	32	33	38	34.3333	33.6667	1.16	1.29	1.16	1.09	1.17	1.42	1.22667	1.20333	-0.243105	0.476133	0.845585
66457	'2810002D19Rik'	lncRNA	1.29	1.25	0.96	0.91	1.09	1	1	1.16667	72	67	50	52	59	54	55	63	1.06	0.99	0.75	0.74	0.83	0.78	0.783333	0.933333	-0.0130315	0.963771	0.979578
664702	'A530088E08Rik'	lncRNA	0.06	0	0.09	0.03	0.03	0	0.02	0.05	2	0	3	1	1	0	0.666667	1.66667	0.05	0	0.07	0.02	0.02	0	0.0133333	0.04	1.11118	0.588714	0.923935
664779	'Gm44505'	lncRNA	6.36	6.55	8.08	6.31	6.5	6.77	6.52667	6.99667	342.04	326.04	393.1	340.08	330	340.03	336.703	353.727	5.23	5.17	6.28	5.15	4.97	5.24	5.12	5.56	-0.145933	0.321141	0.692655
664849	'Gm7367'	lncRNA
664862	'Gpr137b-ps'	lncRNA	2.19	4.08	3.14	1.13	1.74	1.24	1.37	3.13667	163	281	217	87	126	89	100.667	220.333	1.8	3.21	2.44	0.92	1.33	0.96	1.07	2.48333	0.919173	0.000232722	0.00261161
66503	'1810034E14Rik'	lncRNA	5.55	4.59	6.25	3.16	6.17	4.24	4.52333	5.46333	153.87	133.78	146.09	82.07	185.53	131.54	133.047	144.58	4.56	3.62	4.86	2.58	4.72	3.28	3.52667	4.34667	-0.077607	0.77755	0.952328
665037	'Gm7457'	lncRNA	0	0	0	0.06	0.02	0	0.0266667	0	0	0	0	3	1	0	1.33333	0	0	0	0	0.05	0.02	0	0.0233333	0	-3.10161	0.304123	0.673895
665205	'Gm14327'	lncRNA	57.64	57.54	59.97	79.52	78	86.05	81.19	58.3833	99.34	102.04	80.25	105.86	115.9	130.52	117.427	93.8767	47.35	45.37	46.63	64.89	59.66	66.52	63.69	46.45	-0.529054	0.0200515	0.0989911
665389	'Gm7616'	lncRNA
665635	'Gm14486'	lncRNA	0	0	0	0.28	0	0	0.0933333	0	0	0	0	3	0	0	1	0	0	0	0	0.23	0	0	0.0766667	0	-2.72352	0.494947	0.863698
665845	'Gm7819'	lncRNA	0.77	3.05	1.59	2.98	2.7	2.69	2.79	1.80333	25.33	95.15	48.24	100.72	86.17	85.27	90.72	56.24	0.63	2.4	1.23	2.43	2.06	2.08	2.19	1.42	-0.918176	0.0300791	0.134782
665934	'Gm7854'	lncRNA	0.93	0.96	0.24	0.12	0.06	0.46	0.213333	0.71	8	12	4	2	1	4	2.33333	8	0.77	0.75	0.19	0.1	0.05	0.36	0.17	0.57	1.55726	0.121608	0.373103
666009	'Gm7889'	lncRNA	1.19	1.86	1.79	1.6	1.07	1.48	1.38333	1.61333	12.74	18.58	17.37	17.94	11.21	15.62	14.9233	16.23	0.98	1.47	1.39	1.3	0.82	1.14	1.08667	1.28	-0.0978199	0.85175	0.952328
666182	'Gm7967'	lncRNA	0.18	0.12	0.11	0.2	0.08	0.08	0.12	0.136667	9.33	15.05	14	16.52	10.23	10	12.25	12.7933	0.15	0.09	0.09	0.17	0.06	0.06	0.0966667	0.11	-0.149556	0.79757	0.952328
66620	'Pantr2'	lncRNA
666422	'Gm8096'	lncRNA
666427	'Gm8098'	lncRNA	0.26	0.09	0.14	0.05	0.13	0.09	0.09	0.163333	7	2	3	1	3	2	2	4	0.21	0.07	0.11	0.04	0.1	0.07	0.07	0.13	0.813992	0.495185	0.863818
666589	'Gm8179'	lncRNA	0	0	0	0	0.18	0	0.06	0	0	0	0	0	2	0	0.666667	0	0	0	0	0	0.14	0	0.0466667	0	-1.99477	0.621905	0.93646
66662	'Fbxl12os'	lncRNA	0.54	0.7	1.08	0.53	0.41	0.39	0.443333	0.773333	28	31.12	35	18	17	15	16.6667	31.3733	0.44	0.56	0.84	0.43	0.31	0.3	0.346667	0.613333	0.693676	0.0920651	0.306937
666680	'Gm8234'	lncRNA	0	0	0	0	0	0.13	0.0433333	0	0	0	0	0	0	2	0.666667	0	0	0	0	0	0	0.1	0.0333333	0	-2.08657	0.605214	0.926559
666737	'4632427E13Rik'	lncRNA	7.55	9.22	8.97	10.01	10.21	9.71	9.97667	8.58	1005.95	1161.06	1115.87	1348.03	1317.4	1244.42	1303.28	1094.29	6.2	7.27	6.97	8.17	7.81	7.51	7.83	6.81333	-0.469963	3.27153e-05	0.000493936
666945	'Gm10638'	lncRNA	0.04	0.15	0.11	0.12	0.09	0.26	0.156667	0.1	2	8	5	7	5	9	7	5	0.03	0.12	0.09	0.1	0.07	0.2	0.123333	0.08	-0.715708	0.399393	0.780458
66709	'4921507G05Rik'	lncRNA	0	0.12	0.09	0.04	0.08	0	0.04	0.07	0	4	2.85	1.38	1	0	0.793333	2.28333	0	0.09	0.07	0.03	0.06	0	0.03	0.0533333	1.35785	0.498717	0.867141
66730	'4921531C22Rik'	lncRNA	1.19	0.83	1.6	1.05	1.36	1	1.13667	1.20667	74	58	97	79	63	64	68.6667	76.3333	0.98	0.66	1.24	0.86	1.04	0.78	0.893333	0.96	-0.0687205	0.815439	0.952328
667335	'Gm8579'	lncRNA
66737	'4921534H16Rik'	lncRNA	0	0	0	0	0.01	0	0.00333333	0	0	0	0	0	1	0	0.333333	0	0	0	0	0	0.01	0	0.00333333	0	-1.17617	0.773161	0.952328
667438	'Gm8633'	lncRNA
66752	'4933404O12Rik'	lncRNA	2.47	2.38	2.18	1.27	2.03	1.93	1.74333	2.34333	235.27	214	186.21	119	179.39	156.18	151.523	211.827	2.03	1.87	1.7	1.03	1.55	1.49	1.35667	1.86667	0.280121	0.174422	0.473656
66760	'Sox5os3'	lncRNA	0	0	0	0	0.07	0	0.0233333	0	0	0	0	0	1	0	0.333333	0	0	0	0	0	0.05	0	0.0166667	0	-1.17617	0.773161	0.952328
66770	'4933429O19Rik'	lncRNA
667728	'H2af-ps2'	lncRNA	0.06	0.03	0.03	0	0.01	0.05	0.02	0.04	4.18	2.07	2.01	0	0.98	3.27	1.41667	2.75333	0.05	0.02	0.02	0	0.01	0.04	0.0166667	0.03	1.20111	0.486705	0.856167
66774	'Carlr'	lncRNA
667768	'Gm11240'	lncRNA
66779	'4933432I09Rik'	lncRNA	0.01	0.01	0.07	0.03	0	0	0.01	0.03	1	2	2	4	0	0	1.33333	1.66667	0	0.01	0.06	0.03	0	0	0.01	0.0233333	0.0475822	0.979808	0.988462
667794	'Gm8817'	lncRNA
66785	'4933433G08Rik'	lncRNA	0	0	0	0	0	0.02	0.00666667	0	0	0	0	0	0	1	0.333333	0	0	0	0	0	0	0.01	0.00333333	0	-1.17617	0.773161	0.952328
667931	'Gm8883'	lncRNA	31.8	38.62	28.66	54.25	43.17	45.5	47.64	33.0267	1349	1528	1166	2614	1838	1965	2139	1347.67	26.12	30.45	22.29	44.27	33.02	35.17	37.4867	26.2867	-0.889917	5.69401e-06	0.000110593
668108	'Gvin-ps3'	lncRNA	0.14	0.25	0.31	0.18	0.24	0.2	0.206667	0.233333	3	5	6	4	5	4	4.33333	4.66667	0.12	0.2	0.24	0.15	0.19	0.15	0.163333	0.186667	-0.109674	0.902898	0.973998
668171	'Zxda'	lncRNA	0.89	0.67	0.64	0.63	0.64	0.98	0.75	0.733333	55	40	35.58	40.12	39.98	57.04	45.7133	43.5267	0.73	0.53	0.5	0.52	0.49	0.76	0.59	0.586667	-0.276601	0.437631	0.812682
668215	'Hectd2os'	lncRNA	70.69	49.12	45.26	25.41	36.87	19.64	27.3067	55.0233	3377	2108	1763	1158	1772	904	1278	2416	58.07	38.73	35.19	20.74	28.2	15.18	21.3733	43.9967	0.728822	0.0097075	0.0563708
668253	'Dleu2'	lncRNA	34.69	43.78	41.08	32.28	45.57	41.24	39.6967	39.85	1636.1	1875.09	1945.72	1486.58	1923.19	1946.97	1785.58	1818.97	28.49	34.52	31.94	26.34	34.86	31.88	31.0267	31.65	-0.185351	0.143727	0.417306
668489	'Gm9199'	lncRNA	0	1.77	0	1.07	1.24	0	0.77	0.59	0	1	0	1	1	0	0.666667	0.333333	0	1.4	0	0.88	0.95	0	0.61	0.466667	-1.10519	0.705796	0.952328
668917	'Zfp133-ps'	lncRNA	0.09	0.12	0.11	0.04	0.12	0.1	0.0866667	0.106667	3	4	4	2	4	3	3	3.66667	0.07	0.09	0.08	0.04	0.09	0.08	0.07	0.08	0.0825911	0.936391	0.975955
66961	'Neat1'	lncRNA	459.17	739.44	639.11	889.48	945.96	855.63	897.023	612.573	41081	65619	53796	83842	85668	72352	80620.7	53498.7	377.17	583.01	496.97	725.91	723.55	661.49	703.65	485.717	-0.810877	1.3698e-06	3.16862e-05
670507	'Gm14317'	lncRNA
670727	'Gm15412'	lncRNA
670775	'Gm11468'	lncRNA
67081	'1700025F24Rik'	lncRNA	0.07	0.21	0.11	0	0.2	0.33	0.176667	0.13	1	3	3	0	3	5	2.66667	2.33333	0.05	0.16	0.09	0	0.15	0.26	0.136667	0.1	-0.400649	0.773601	0.952328
671336	'Gm9530'	lncRNA	0.27	0.25	0.34	0.07	0.1	0.04	0.07	0.286667	16	20	23	6	8	3	5.66667	19.6667	0.22	0.2	0.27	0.05	0.08	0.03	0.0533333	0.23	1.58356	0.0111754	0.0629471
67170	'2610306M01Rik'	lncRNA	0.07	0.09	0.12	0.02	0.08	0.13	0.0766667	0.0933333	6	8	10	2	7	11	6.66667	8	0.05	0.07	0.09	0.02	0.06	0.1	0.06	0.07	0.0533976	0.947323	0.975955
67188	'2700046G09Rik'	lncRNA	0.42	0.59	0.88	0.39	0.51	0.44	0.446667	0.63	23	31	45	22	27	23	24	33	0.34	0.47	0.68	0.32	0.39	0.34	0.35	0.496667	0.241948	0.553087	0.901778
67194	'2700038G22Rik'	lncRNA	0.18	0.31	1.21	1.12	0.04	0.15	0.436667	0.566667	5	9	18	11	1	4	5.33333	10.6667	0.14	0.24	0.94	0.91	0.03	0.11	0.35	0.44	0.736076	0.435044	0.810725
67261	'2900005J15Rik'	lncRNA	0.48	0.38	0.53	0.45	0.49	0.82	0.586667	0.463333	4	4.5	4	4	4	9.61	5.87	4.16667	0.4	0.3	0.42	0.37	0.37	0.63	0.456667	0.373333	-0.720515	0.422185	0.799055
672763	'Gm13710'	lncRNA	15.02	17.47	26.67	26.71	27.03	19.47	24.4033	19.72	673.92	742.63	1110.61	1228.93	1169.18	844.84	1080.98	842.387	12.33	13.78	20.74	21.8	20.67	15.05	19.1733	15.6167	-0.581834	0.00733866	0.0451433
67280	'3110009F21Rik'	lncRNA
67293	'3110039M20Rik'	lncRNA
67303	'3110045C21Rik'	lncRNA	0.51	0.46	0.64	0.57	1.2	0.85	0.873333	0.536667	13	11	15	15	20	21	18.6667	13	0.42	0.36	0.5	0.47	0.92	0.66	0.683333	0.426667	-0.73324	0.139268	0.408589
67319	'1700041C23Rik'	lncRNA
67321	'1700044K03Rik'	lncRNA
67325	'1700034G24Rik'	lncRNA
67327	'1700031L13Rik'	lncRNA	5.88	5.78	4.87	5.55	6.5	5.39	5.81333	5.51	241.15	225.95	185.28	233.72	258.76	212.78	235.087	217.46	4.83	4.56	3.78	4.53	4.97	4.17	4.55667	4.39	-0.320169	0.0821014	0.283399
67329	'1700018L02Rik'	lncRNA	1.09	1.37	1.73	0.88	0.72	1.52	1.04	1.39667	47	56	69	39	30	63	44	57.3333	0.9	1.08	1.34	0.72	0.55	1.18	0.816667	1.10667	0.155601	0.674812	0.952328
67330	'1700047M11Rik'	lncRNA	1.3	1.04	1.97	1.17	0.74	0.86	0.923333	1.43667	52.33	44.86	70.98	50.06	33.37	36.47	39.9667	56.0567	1.07	0.82	1.53	0.95	0.57	0.67	0.73	1.14	0.255031	0.466096	0.837513
67336	'1700054K19Rik'	lncRNA
67339	'1700066J03Rik'	lncRNA	0	0	0.19	0	0	0	0	0.0633333	0	0	1	0	0	0	0	0.333333	0	0	0.15	0	0	0	0	0.05	0.747384	0.854672	0.952328
67342	'Kcnmb4os1'	lncRNA
67348	'1700083H02Rik'	lncRNA	0	0	0	0.11	0	0	0.0366667	0	0	0	0	2	0	0	0.666667	0	0	0	0	0.09	0	0	0.03	0	-2.13576	0.596345	0.923935
67351	'Tmem132cos'	lncRNA
67355	'1700109G14Rik'	lncRNA
67357	'1700092C02Rik'	lncRNA
67360	'1700095B10Rik'	lncRNA
67394	'4930404I05Rik'	lncRNA	0.04	0.05	0.02	0.04	0.07	0.06	0.0566667	0.0366667	3	3	1	3	5	4	4	2.33333	0.04	0.04	0.01	0.03	0.06	0.05	0.0466667	0.03	-0.977681	0.371497	0.74816
67518	'1700039M10Rik'	lncRNA
67522	'1700097N02Rik'	lncRNA	0	0.2	0.21	0	0	0	0	0.136667	0	1	1	0	0	0	0	0.666667	0	0.16	0.16	0	0	0	0	0.106667	1.62139	0.688156	0.952328
67523	'1700094J05Rik'	lncRNA	0	0.04	0.03	0.07	0.1	0.12	0.0966667	0.0233333	0	3.13	2	6.01	7.96	9.03	7.66667	1.71	0	0.03	0.02	0.06	0.08	0.09	0.0766667	0.0166667	-2.36137	0.0278959	0.127486
67524	'1700095A21Rik'	lncRNA	1.62	1.12	0.92	0.6	1.44	0.68	0.906667	1.22	28.27	21.09	17	11	28.78	13	17.5933	22.12	1.33	0.88	0.71	0.49	1.1	0.53	0.706667	0.973333	0.15543	0.767623	0.952328
67531	'5730408K05Rik'	lncRNA
675325	'2410017I17Rik'	lncRNA	0.35	0.36	0.41	0.15	0.4	0.51	0.353333	0.373333	27	26	29	11.65	29	37.12	25.9233	27.3333	0.29	0.28	0.32	0.12	0.31	0.39	0.273333	0.296667	-0.112819	0.815709	0.952328
67548	'4933424M12Rik'	lncRNA	0	0.02	0.02	0	0	0	0	0.0133333	0	1	1	0	0	0	0	0.666667	0	0.02	0.02	0	0	0	0	0.0133333	1.62139	0.688156	0.952328
67550	'4933416O17Rik'	lncRNA
67552	'Macroh2a3'	lncRNA	0.78	0.74	0.93	0.2	0.43	0.6	0.41	0.816667	25.39	22.82	27.94	6.76	13.7	18.91	13.1233	25.3833	0.64	0.58	0.72	0.16	0.33	0.47	0.32	0.646667	0.792478	0.130043	0.390908
67585	'4930455J16Rik'	lncRNA	0.04	0.03	0.08	0.44	0.34	0.19	0.323333	0.05	1	3	3	17	13	12	14	2.33333	0.03	0.03	0.06	0.36	0.26	0.15	0.256667	0.04	-2.81046	0.000614145	0.00591675
67637	'4930470P17Rik'	lncRNA
67638	'4930483J18Rik'	lncRNA	0.04	0	0	0	0	0	0	0.0133333	1	0	0	0	0	0	0	0.333333	0.03	0	0	0	0	0	0	0.01	0.747384	0.854672	0.952328
67639	'4930474N09Rik'	lncRNA
67641	'4930505M18Rik'	lncRNA
67644	'4930517G24Rik'	lncRNA
67651	'4930527F14Rik'	lncRNA	0.09	0.09	0	0.16	0.21	0.12	0.163333	0.06	1	2	0	2	3	2	2.33333	1	0.08	0.07	0	0.13	0.16	0.09	0.126667	0.05	-1.42472	0.361805	0.73783
67659	'4930563I02Rik'	lncRNA
67672	'0610040B10Rik'	lncRNA	2.72	3.74	1.93	3.38	3.06	3.88	3.44	2.79667	56	61	48	51.88	75	60.22	62.3667	55	2.23	2.95	1.5	2.76	2.34	3	2.7	2.22667	-0.379181	0.178032	0.480223
67723	'Cep83os'	lncRNA	1.66	2.52	2.41	1.25	1.89	2.29	1.81	2.19667	146.71	122	162	81	109.3	114.13	101.477	143.57	1.37	1.99	1.87	1.02	1.45	1.77	1.41333	1.74333	0.289788	0.198519	0.516344
67740	'4930588J15Rik'	lncRNA
67745	'4930583K01Rik'	lncRNA	0	0	0.05	0.05	0	0	0.0166667	0.0166667	0	0	1	1	0	0	0.333333	0.333333	0	0	0.04	0.04	0	0	0.0133333	0.0133333	-0.214388	0.95654	0.975955
67746	'4930577N17Rik'	lncRNA	0.61	0.17	0.17	0.14	0	0.6	0.246667	0.316667	4	1	1	1	0	4	1.66667	2	0.5	0.13	0.13	0.12	0	0.46	0.193333	0.253333	0.0478605	0.976646	0.987167
67765	'5830432E09Rik'	lncRNA	0.18	0.34	0.35	0.15	0.24	0.13	0.173333	0.29	9.59	17.56	23	12	10.63	10.74	11.1233	16.7167	0.15	0.26	0.27	0.12	0.18	0.1	0.133333	0.226667	0.387821	0.507077	0.873188
67791	'6530411M01Rik'	lncRNA
67850	'1700007F19Rik'	lncRNA	0.09	0.09	0.19	0.06	0.08	0.06	0.0666667	0.123333	13.36	14.51	30.06	8	12.84	10	10.28	19.31	0.08	0.07	0.15	0.05	0.06	0.05	0.0533333	0.1	0.709825	0.227174	0.563701
67927	'1700096J18Rik'	lncRNA
67934	'1700124L16Rik'	lncRNA	0	0.12	0	0.2	0.08	0.04	0.106667	0.04	0	2	0	5	2	1	2.66667	0.666667	0	0.09	0	0.16	0.06	0.03	0.0833333	0.03	-2.24275	0.221446	0.556199
68108	'Snhg17'	lncRNA	7.5	10.26	14.5	9.55	8.96	9.12	9.21	10.7533	585	594.43	875	574	598	528	566.667	684.81	6.16	8.09	11.28	7.79	6.85	7.05	7.23	8.51	0.0543052	0.759628	0.952328
68128	'Fam120aos'	lncRNA	12.25	13.29	14.26	7.36	9.68	9.17	8.73667	13.2667	246	245	309	180	231	213	208	266.667	10.06	10.48	11.09	6.01	7.41	7.09	6.83667	10.5433	0.146182	0.389344	0.770673
68161	'A930005H10Rik'	lncRNA	11.16	9.99	10.54	4.18	8.39	7.7	6.75667	10.5633	114	82	86	51	80	72	67.6667	94	9.17	7.87	8.2	3.41	6.41	5.96	5.26	8.41333	0.271805	0.328533	0.700885
68162	'A930003A15Rik'	lncRNA
68173	'Ppifos'	lncRNA	0.19	0	0.07	0	0	0	0	0.0866667	3	0	1	0	0	0	0	1.33333	0.16	0	0.05	0	0	0	0	0.07	2.66937	0.399662	0.780458
68180	'Hyi'	lncRNA	9.52	9.35	8.06	4.88	7.43	8.58	6.96333	8.97667	286	267	224	151	217	249	205.667	259	7.82	7.37	6.26	3.98	5.68	6.63	5.43	7.15	0.126447	0.567539	0.913592
68190	'Dubr'	lncRNA	0.94	1.39	1.42	0.79	0.79	0.78	0.786667	1.25	52	63	70	45	43	41	43	61.6667	0.77	1.1	1.11	0.65	0.6	0.6	0.616667	0.993333	0.301868	0.29499	0.661896
68204	'2900060B14Rik'	lncRNA
68245	'1700108J01Rik'	lncRNA	0.03	0	0.06	0.05	0.14	0.03	0.0733333	0.03	1	0	2	2	5	1	2.66667	1	0.02	0	0.05	0.04	0.11	0.02	0.0566667	0.0233333	-1.60739	0.312281	0.682634
68246	'1700112J05Rik'	lncRNA
68271	'Zfp85os'	lncRNA	0.36	0.58	0.49	0.38	0.57	0.39	0.446667	0.476667	22	30	26	21	30	20	23.6667	26	0.3	0.46	0.38	0.31	0.43	0.3	0.346667	0.38	-0.0737983	0.855987	0.952702
68285	'C630043F03Rik'	lncRNA	0.08	0.16	0.08	0.03	0.06	0.05	0.0466667	0.106667	5	10	5	2	4	3	3	6.66667	0.06	0.12	0.06	0.02	0.05	0.04	0.0366667	0.08	0.944717	0.310719	0.681252
68306	'4930565N06Rik'	lncRNA	0.01	0.02	0.02	0.02	0.04	0.01	0.0233333	0.0166667	1	2	2	3	5	1	3	1.66667	0.01	0.01	0.01	0.02	0.03	0.01	0.02	0.01	-1.0524	0.4184	0.795456
68308	'4933406F09Rik'	lncRNA
68314	'Hnf4aos'	lncRNA	42.03	44.09	25.58	20.67	39.53	21.65	27.2833	37.2333	7634.99	7998.95	4605.5	4001.08	7319.98	3898.06	5073.04	6746.48	34.53	34.76	19.89	16.87	30.24	16.74	21.2833	29.7267	0.220243	0.402376	0.783122
68354	'Plekhd1os'	lncRNA	0	0.05	0	0	0	0	0	0.0166667	0	1	0	0	0	0	0	0.333333	0	0.04	0	0	0	0	0	0.0133333	0.747384	0.854672	0.952328
68355	'2010204K13Rik'	lncRNA	0	0.06	0.11	0	0.1	0	0.0333333	0.0566667	0	1	2	0	1	0	0.333333	1	0	0.05	0.09	0	0.08	0	0.0266667	0.0466667	1.24358	0.650104	0.952328
68369	'0610031O16Rik'	lncRNA	66.77	59.14	52.48	36.35	49.09	45.31	43.5833	59.4633	3108	2857	2293	1809	2422	2139	2123.33	2752.67	54.85	46.63	40.81	29.66	37.55	35.03	34.08	47.43	0.170553	0.285247	0.647688
68397	'0610039H22Rik'	lncRNA	0.66	0.72	0.77	0.7	0.82	0.71	0.743333	0.716667	24	25	26	26	29	25	26.6667	25	0.54	0.57	0.6	0.57	0.63	0.55	0.583333	0.57	-0.306273	0.421881	0.798911
68400	'0610043K17Rik'	lncRNA	9.92	10.89	6.77	5.91	5.3	4.83	5.34667	9.19333	287	384	224	188	184	133	168.333	298.333	8.15	8.59	5.27	4.83	4.06	3.74	4.21	7.33667	0.612175	0.0142822	0.0765473
68434	'Gata6os'	lncRNA	7.2	5.08	6.72	6.34	7.13	6.06	6.51	6.33333	126	110	120	129	132	119	126.667	118.667	5.92	4	5.23	5.17	5.45	4.68	5.1	5.05	-0.307299	0.122036	0.374096
68444	'Cyp2d13'	lncRNA	0.97	1.1	0.56	0.79	0.82	0	0.536667	0.876667	4.65	4.75	2.32	4.11	3.93	0	2.68	3.90667	0.8	0.87	0.43	0.65	0.63	0	0.426667	0.7	0.302865	0.813463	0.952328
68488	'1110002J07Rik'	lncRNA	0.33	0.83	0.53	0.38	0.35	0.27	0.333333	0.563333	23	27	18	20	18	15	17.6667	22.6667	0.27	0.65	0.42	0.31	0.27	0.21	0.263333	0.446667	0.144984	0.749603	0.952328
68531	'1110020A21Rik'	lncRNA	1.58	1.58	0.98	1.69	2.14	0.44	1.42333	1.38	34	31	19	20	21	14	18.3333	28	1.3	1.25	0.76	1.38	1.64	0.34	1.12	1.10333	0.403748	0.378619	0.757019
68690	'1110028F11Rik'	lncRNA	2.55	4.13	3.08	1.14	2.72	0.73	1.53	3.25333	54	61	45	22	39	17	26	53.3333	2.1	3.25	2.4	0.93	2.08	0.56	1.19	2.58333	0.836837	0.031558	0.139601
68697	'1110036E04Rik'	lncRNA
68763	'1110038B12Rik'	lncRNA	13.18	22.07	27.64	28.05	18.4	15.8	20.75	20.9633	178	206	291	270	228	207	235	225	10.83	17.4	21.49	22.89	14.08	12.21	16.3933	16.5733	-0.287282	0.205675	0.528775
68789	'Trmt61b'	lncRNA	7.54	7.09	8.31	6.26	6.31	6.31	6.29333	7.64667	175	173	200	162	164	151	159	182.667	6.2	5.59	6.46	5.11	4.83	4.87	4.93667	6.08333	-0.0152986	0.929722	0.975955
68790	'Fendrr'	lncRNA	2.26	1.82	2.6	1.84	1.98	1.94	1.92	2.22667	169	133	184	126	136	132	131.333	162	1.86	1.44	2.02	1.5	1.51	1.5	1.50333	1.77333	0.0893573	0.660942	0.952328
68808	'1110046J04Rik'	lncRNA	0.29	0.32	0.32	0.14	0.39	0.18	0.236667	0.31	8	15	8	4	7	6	5.66667	10.3333	0.24	0.25	0.25	0.11	0.3	0.14	0.183333	0.246667	0.657956	0.36563	0.741499
68841	'Lppos'	lncRNA	7.09	7.2	6.79	3.92	4.05	5	4.32333	7.02667	185	176	169	117	108	138	121	176.667	5.82	5.67	5.28	3.2	3.1	3.86	3.38667	5.59	0.329979	0.104555	0.334962
68949	'Zfas1'	lncRNA	7.96	17.85	12.85	6.85	14.26	6.1	9.07	12.8867	76	119	111	69	56	58	61	102	6.53	14.08	9.99	5.59	10.91	4.72	7.07333	10.2	0.518061	0.0595299	0.225302
68954	'1500012K07Rik'	lncRNA
68982	'1500015A07Rik'	lncRNA	2.44	2.03	1.29	1.38	1.01	1.93	1.44	1.92	27	21	15	17	12	23	17.3333	21	2.01	1.6	1	1.13	0.77	1.49	1.13	1.53667	0.0609007	0.905096	0.974743
68986	'Gad1os'	lncRNA	0.05	0	0	0	0	0	0	0.0166667	1	0	0	0	0	0	0	0.333333	0.04	0	0	0	0	0	0	0.0133333	0.747384	0.854672	0.952328
68994	'1500015L24Rik'	lncRNA	0.6	0.21	0.97	0.21	0.39	0.07	0.223333	0.593333	21.59	10.59	21.72	6	14.83	4	8.27667	17.9667	0.5	0.16	0.75	0.17	0.3	0.05	0.173333	0.47	0.923732	0.171394	0.467913
69002	'1500026H17Rik'	lncRNA	2.68	3.16	3.28	1.29	1.54	2.54	1.79	3.04	42	51	61	31	27	36	31.3333	51.3333	2.2	2.49	2.55	1.05	1.18	1.97	1.4	2.41333	0.490706	0.145104	0.420297
69004	'6330418K02Rik'	lncRNA	0.91	1.31	2.22	1.06	1.52	1.35	1.31	1.48	21	24	34	23	29	22	24.6667	26.3333	0.75	1.03	1.73	0.86	1.16	1.04	1.02	1.17	-0.119878	0.768421	0.952328
69030	'1810006J02Rik'	lncRNA
69086	'1810019N24Rik'	lncRNA	0	0.55	0	0	0	0	0	0.183333	0	2	0	0	0	0	0	0.666667	0	0.43	0	0	0	0	0	0.143333	1.63075	0.686389	0.952328
69108	'1810012K16Rik'	lncRNA	1.27	0.94	0.59	1.14	0.8	0.82	0.92	0.933333	18	13	7	21	14	14	16.3333	12.6667	1.05	0.74	0.46	0.93	0.61	0.64	0.726667	0.75	-0.580932	0.318867	0.690378
69120	'1810021B22Rik'	lncRNA	3.26	2.19	4.09	2.2	1.81	4.77	2.92667	3.18	16	14	15	15	8	13	12	15	2.68	1.73	3.18	1.8	1.38	3.69	2.29	2.53	0.0978043	0.860198	0.955056
69166	'1810018F18Rik'	lncRNA
69170	'Chaserr'	lncRNA	26.13	28.71	32.83	34.74	33.07	41.66	36.49	29.2233	831.83	825.07	978.16	897.87	818.03	837.33	851.077	878.353	21.46	22.64	25.53	28.36	25.3	32.21	28.6233	23.21	-0.173605	0.192868	0.506061
69193	'Platr10'	lncRNA
69206	'2010016I18Rik'	lncRNA	1.12	0.54	1.04	0.57	0.64	0.42	0.543333	0.9	37	18	27	22	20	15	19	27.3333	0.92	0.43	0.81	0.46	0.49	0.32	0.423333	0.72	0.315066	0.503772	0.871228
69221	'2410006H16Rik'	lncRNA	15.22	21.71	23.37	12.3	14.7	12.24	13.08	20.1	142	176	199.01	147.69	153	141.01	147.233	172.337	12.5	17.11	18.17	10.04	11.24	9.46	10.2467	15.9267	0.0117108	0.95116	0.975955
69248	'2610035F20Rik'	lncRNA	0.15	0	0	0	0	0	0	0.05	1	0	0	0	0	0	0	0.333333	0.13	0	0	0	0	0	0	0.0433333	0.747384	0.854672	0.952328
69279	'1700001D01Rik'	lncRNA
69291	'1700001L05Rik'	lncRNA	7.86	8.88	5	3.14	4.89	2.7	3.57667	7.24667	500	591	379	195	310	186	230.333	490	6.46	7	3.89	2.56	3.74	2.09	2.79667	5.78333	0.889209	0.000169197	0.00200836
69295	'Far1os'	lncRNA
69303	'1700001G11Rik'	lncRNA	0.03	0.07	0	0	0	0	0	0.0333333	1	1	0	0	0	0	0	0.666667	0.03	0.06	0	0	0	0	0	0.03	1.65927	0.67916	0.952328
69308	'1700007P06Rik'	lncRNA	0.06	0.02	0.03	0	0.08	0.09	0.0566667	0.0366667	3.89	1	2	0	4.83	5.48	3.43667	2.29667	0.05	0.01	0.03	0	0.06	0.07	0.0433333	0.03	-0.769581	0.583419	0.922284
69311	'1700008K24Rik'	lncRNA
69319	'1700001K23Rik'	lncRNA	0	0	0.12	0	0	0	0	0.04	0	0	1	0	0	0	0	0.333333	0	0	0.09	0	0	0	0	0.03	0.747384	0.854672	0.952328
69320	'1700007J10Rik'	lncRNA	0	0	0.03	0.02	0.05	0.15	0.0733333	0.01	0	0	1	1	2	6	3	0.333333	0	0	0.02	0.02	0.03	0.11	0.0533333	0.00666667	-3.28023	0.0824393	0.284197
69334	'1700012I11Rik'	lncRNA
69337	'1700012C14Rik'	lncRNA
69338	'1700003D09Rik'	lncRNA
69350	'1700003G18Rik'	lncRNA	0.17	0.31	0.38	0.19	0.4	0.25	0.28	0.286667	3	8	5	4	6	3	4.33333	5.33333	0.14	0.24	0.3	0.16	0.3	0.19	0.216667	0.226667	0.088174	0.922522	0.975955
69355	'1700010J16Rik'	lncRNA	0.11	0	0.09	0.07	0.14	0.06	0.09	0.0666667	4.84	0	2	5.85	3.51	4.28	4.54667	2.28	0.09	0	0.07	0.06	0.11	0.04	0.07	0.0533333	-1.21214	0.329936	0.702472
69356	'1700003I22Rik'	lncRNA
69370	'1700017L05Rik'	lncRNA
69388	'1700018G05Rik'	lncRNA	0	0	0	0	0.01	0	0.00333333	0	0	0	0	0	1	0	0.333333	0	0	0	0	0	0.01	0	0.00333333	0	-1.17617	0.773161	0.952328
69393	'1700024B18Rik'	lncRNA	0.91	0.89	1.09	0.93	0.98	1.02	0.976667	0.963333	77.39	72.95	86.95	81.11	80.94	82.89	81.6467	79.0967	0.75	0.71	0.85	0.76	0.75	0.78	0.763333	0.77	-0.264116	0.259198	0.611412
69402	'1700019F05Rik'	lncRNA
69405	'1700019E08Rik'	lncRNA
69407	'1700025J12Rik'	lncRNA
69409	'1700021N21Rik'	lncRNA
69412	'1700016L04Rik'	lncRNA
69413	'1700016P04Rik'	lncRNA
69418	'1700025K24Rik'	lncRNA
69419	'1700026F02Rik'	lncRNA
69430	'1700048O20Rik'	lncRNA	0.28	0.33	0.98	0.47	0.79	0.14	0.466667	0.53	11	7	16	14	20	5.39	13.13	11.3333	0.23	0.26	0.76	0.38	0.6	0.11	0.363333	0.416667	-0.402334	0.553839	0.90207
69431	'1700022N22Rik'	lncRNA	0.83	0.62	0.55	0.61	0.53	0.65	0.596667	0.666667	21	15	13	16	13	16	15	16.3333	0.68	0.49	0.43	0.5	0.4	0.5	0.466667	0.533333	-0.0905532	0.860224	0.955056
69432	'1700026J14Rik'	lncRNA
69433	'1700023F02Rik'	lncRNA
69434	'Snhg10'	lncRNA	1.46	0.37	1.04	0.48	0.7	0.63	0.603333	0.956667	10	3	6	4	6	4	4.66667	6.33333	1.2	0.29	0.81	0.39	0.53	0.49	0.47	0.766667	0.243086	0.781425	0.952328
69443	'1700027J07Rik'	lncRNA	0.43	0.67	0.6	3.01	2.17	2.53	2.57	0.566667	18	28	21	114	76	89	93	22.3333	0.36	0.53	0.47	2.46	1.66	1.95	2.02333	0.453333	-2.28455	3.58489e-11	2.3823e-09
69449	'1700027A15Rik'	lncRNA
69460	'1700028M03Rik'	lncRNA
69476	'1700029M03Rik'	lncRNA
69491	'1700029N11Rik'	lncRNA
69495	'1700029B22Rik'	lncRNA
69517	'2310001K24Rik'	lncRNA	0.42	0.3	0.08	0.34	0.57	0.64	0.516667	0.266667	6	4	1	5	8	9	7.33333	3.66667	0.34	0.23	0.06	0.27	0.44	0.5	0.403333	0.21	-1.19694	0.188313	0.49828
69548	'2310015A10Rik'	lncRNA	5.17	4.02	4.17	11.2	9.09	10.07	10.12	4.45333	151	171	159	716	399	460	525	160.333	4.25	3.17	3.25	9.14	6.96	7.78	7.96	3.55667	-1.94236	4.89301e-14	5.322e-12
69571	'2310034O05Rik'	lncRNA	0.93	0.2	1.56	0.35	0.13	0.13	0.203333	0.896667	5	1	9	3	1	1	1.66667	5	0.76	0.16	1.21	0.29	0.1	0.1	0.163333	0.71	1.34973	0.28902	0.653527
69578	'2310016G11Rik'	lncRNA	0.09	0.2	0.1	0	0.05	0	0.0166667	0.13	2	4	2	0	1	0	0.333333	2.66667	0.08	0.16	0.08	0	0.04	0	0.0133333	0.106667	2.67891	0.157462	0.443182
69591	'Mdrl'	lncRNA	0.09	0.05	0.1	0.04	0.05	0	0.03	0.08	2	1	2	1	1	0	0.666667	1.66667	0.07	0.04	0.08	0.04	0.03	0	0.0233333	0.0633333	1.11383	0.546332	0.896083
69603	'2310020H05Rik'	lncRNA
69629	'2310039L15Rik'	lncRNA	0.03	0	0	0.1	0.03	0.01	0.0466667	0.01	3	0	0	4	3	1	2.66667	1	0.02	0	0	0.08	0.02	0.01	0.0366667	0.00666667	-1.60403	0.356851	0.732041
69631	'Plet1os'	lncRNA	0.67	0.75	1.13	0.35	0.9	1.05	0.766667	0.85	20	21	18	11	27	26	21.3333	19.6667	0.55	0.59	0.88	0.29	0.69	0.82	0.6	0.673333	-0.318165	0.513592	0.877628
69652	'2310069B03Rik'	lncRNA
69659	'2310069G16Rik'	lncRNA	0.11	0.36	0.13	0.06	0	0.06	0.04	0.2	3	5	2	1	0	1	0.666667	3.33333	0.09	0.28	0.1	0.05	0	0.05	0.0333333	0.156667	2.09121	0.191033	0.503277
69678	'Atcayos'	lncRNA	0.01	0	0	0.03	0.02	0.03	0.0266667	0.00333333	1	0	0	1	2	1	1.33333	0.333333	0.01	0	0	0.03	0.02	0.03	0.0266667	0.00333333	-2.09461	0.342006	0.715649
69681	'Cdk3'	lncRNA	0	0	0	0.12	0.37	0	0.163333	0	0	0	0	1	3	0	1.33333	0	0	0	0	0.09	0.29	0	0.126667	0	-3.03063	0.321934	0.693443
69729	'2410003L11Rik'	lncRNA	0.15	0.03	0	0.38	0.17	0.14	0.23	0.06	5	1	0	11	5	4	6.66667	2	0.13	0.02	0	0.31	0.13	0.11	0.183333	0.05	-1.94618	0.106357	0.338777
69732	'2410018L13Rik'	lncRNA	0.16	0.09	0.06	0.14	0.3	0.09	0.176667	0.103333	4.57	2	4.64	4.03	11.1	4.96	6.69667	3.73667	0.13	0.07	0.04	0.11	0.23	0.07	0.136667	0.08	-1.11554	0.237994	0.57982
69739	'2410004I01Rik'	lncRNA
69749	'Epb41l4aos'	lncRNA	9.31	10.9	11.17	8.4	8.84	7.19	8.14333	10.46	68	74	73	66	64	52	60.6667	71.6667	7.64	8.59	8.68	6.85	6.76	5.56	6.39	8.30333	0.0249787	0.922857	0.975955
69750	'2410021H03Rik'	lncRNA	0.03	0.11	0.15	0	0.07	0	0.0233333	0.0966667	1	3	4	0	2	0	0.666667	2.66667	0.03	0.09	0.12	0	0.05	0	0.0166667	0.08	1.81667	0.32507	0.697533
69768	'1600019K03Rik'	lncRNA
69771	'1810019D21Rik'	lncRNA	19.12	22.54	14.46	19.86	23.72	21.57	21.7167	18.7067	983	1118	743	1002	1285	1050	1112.33	948	15.7	17.77	11.25	16.21	18.14	16.68	17.01	14.9067	-0.436795	0.0135461	0.0733989
69776	'1600002D24Rik'	lncRNA
69781	'1600010M07Rik'	lncRNA	0.74	0.25	0.43	0.15	0.24	0.09	0.16	0.473333	7	3	5	2	3	1	2	5	0.61	0.2	0.33	0.12	0.18	0.07	0.123333	0.38	1.12307	0.308615	0.679065
69794	'1600027J07Rik'	lncRNA
69798	'1810044D09Rik'	lncRNA	6.87	7.29	6.52	2.88	4.79	5.43	4.36667	6.89333	56	50	46	26	36	44	35.3333	50.6667	5.64	5.75	5.07	2.35	3.67	4.2	3.40667	5.48667	0.311333	0.355246	0.730183
69808	'Rap1gapos'	lncRNA	0.16	0	0.26	0	0.08	0	0.0266667	0.14	2	0	3	0	1	0	0.333333	1.66667	0.13	0	0.2	0	0.06	0	0.02	0.11	2.00268	0.409175	0.789188
69812	'Abhd11os'	lncRNA	0.27	0.13	0.19	0.05	0.2	0.21	0.153333	0.196667	10	7	7	2	5	6	4.33333	8	0.23	0.11	0.15	0.04	0.16	0.16	0.12	0.163333	0.683573	0.406558	0.78678
69854	'1810063I02Rik'	lncRNA
69857	'1810053B23Rik'	lncRNA	6.11	5.08	5.56	1.92	0.79	1.87	1.52667	5.58333	185	164	160	58	25	48.95	43.9833	169.667	5.02	4.01	4.32	1.57	0.6	1.45	1.20667	4.45	1.73015	1.04615e-07	3.33625e-06
69862	'1810064F22Rik'	lncRNA	1.53	1.15	2.46	0.28	0.88	0.65	0.603333	1.71333	42	30	61	8	22	15.4	15.1333	44.3333	1.25	0.91	1.91	0.23	0.67	0.5	0.466667	1.35667	1.36203	0.00476143	0.0319523
69895	'Snhg8'	lncRNA	34.81	39.87	42.37	24.21	39.79	31.35	31.7833	39.0167	217	238	245	182	258	219	219.667	233.333	28.59	31.43	32.95	19.76	30.44	24.24	24.8133	30.99	-0.122137	0.46219	0.833165
69909	'2610027K06Rik'	lncRNA	0.16	0.21	0.15	0.02	0.24	0.08	0.113333	0.173333	3	5	4	1	6	4	3.66667	4	0.13	0.16	0.12	0.02	0.18	0.06	0.0866667	0.136667	-0.0692473	0.94674	0.975955
69918	'2610020C07Rik'	lncRNA	0.09	0.11	1.14	2.57	0.05	0.06	0.893333	0.446667	7	8	7	9	4	5	6	7.33333	0.08	0.09	0.88	2.1	0.04	0.05	0.73	0.35	0.06124	0.936682	0.975955
69941	'2810408I11Rik'	lncRNA	2.48	2.27	3.02	1.84	2.96	1.76	2.18667	2.59	57	51	64	46	69	39	51.3333	57.3333	2.04	1.79	2.35	1.5	2.26	1.36	1.70667	2.06	-0.0459558	0.882286	0.964894
69952	'Tunar'	lncRNA
69964	'2810403D21Rik'	lncRNA	1.76	1.48	1.67	1.7	1.73	2.18	1.87	1.63667	88.62	68.71	79.55	78.65	82.02	85.96	82.21	78.96	1.45	1.16	1.3	1.39	1.32	1.69	1.46667	1.30333	-0.272416	0.263368	0.616966
69966	'2810404M03Rik'	lncRNA
69972	'2810425M01Rik'	lncRNA	0.24	0.25	0.19	0.23	0.56	0.39	0.393333	0.226667	11	11	8	11	25	17	17.6667	10	0.2	0.2	0.15	0.19	0.43	0.3	0.306667	0.183333	-1.01798	0.0726355	0.26023
69986	'1700025N23Rik'	lncRNA	0	0.04	0.08	0.08	0.04	0.09	0.07	0.04	0	1	2	2.01	1	2	1.67	1	0	0.03	0.06	0.07	0.03	0.07	0.0566667	0.03	-0.98033	0.565579	0.91166
69999	'1700027F09Rik'	lncRNA
70001	'1700028B04Rik'	lncRNA	0.08	0.04	0	0	0.1	0	0.0333333	0.04	1.64	0.83	0	0	1.96	0	0.653333	0.823333	0.06	0.03	0	0	0.07	0	0.0233333	0.03	-0.214388	0.957017	0.975955
70004	'1700028J19Rik'	lncRNA	0.05	0	0.1	0.14	0.05	0.15	0.113333	0.05	1	0	2	2.98	1	3	2.32667	1	0.04	0	0.08	0.11	0.04	0.11	0.0866667	0.04	-1.23128	0.455765	0.82736
70005	'Znf41-ps'	lncRNA	10.59	9.96	9.03	4.53	18.95	14.36	12.6133	9.86	30.1	26.23	22.2	14.34	52.35	44.64	37.11	26.1767	8.7	7.85	7.02	3.7	14.49	11.1	9.76333	7.85667	-0.685334	0.166626	0.459373
70011	'1700030N03Rik'	lncRNA	0.18	0.11	0.46	0.27	0.32	0.22	0.27	0.25	38.89	26.29	24.35	33.04	44.04	44.55	40.5433	29.8433	0.15	0.08	0.36	0.22	0.24	0.17	0.21	0.196667	-0.664316	0.0726455	0.260231
70036	'Dancr'	lncRNA	0.16	0	0.15	0	0.05	0.09	0.0466667	0.103333	2	0	3	0	1	2	1	1.66667	0.13	0	0.11	0	0.04	0.07	0.0366667	0.08	0.533717	0.781851	0.952328
70040	'2610037D02Rik'	lncRNA	0.1	0.04	0.04	0.14	0.11	0.13	0.126667	0.06	5.63	1	2	8	6.02	6.85	6.95667	2.87667	0.08	0.03	0.03	0.12	0.09	0.1	0.103333	0.0466667	-1.53137	0.116241	0.361822
70055	'1700030L20Rik'	lncRNA
[truncated: 16,073 more rows]

## Sheet: DE_lncRNAs
Gene ID	Gene Symbol	Type	H1 TPM	H2 TPM	H3 TPM	N1 TPM	N2 TPM	N3 TPM	ND Average TPM	HFD Average TPM	H1 Read Count	H2 Read Count	H3 Read Count	N1 Read Count	N2 Read Count	N3 Read Count	ND Average Read Count	HFD Average Read Count	H1 FPKM	H2 FPKM	H3 FPKM	N1 FPKM	N2 FPKM	N3 FPKM	ND Average FPKM	HFD Average FPKM	log2 (HFD / ND)	Pvalue(HFD / ND)	Qvalue (HFD / ND)
URS00009AE87C	'URS00009AE87C'	lncRNA	27.95	31.04	38.9	34.81	36.78	33.96	35.1833	32.63	67.79	64.65	78.59	96.13	91.68	90	92.6033	70.3433	22.96	24.48	30.25	28.41	28.13	26.25	27.5967	25.8967	-0.623315	0.0082291	0.049568
108167326	'Gm2788'	lncRNA	3.7	5.46	10.52	10.98	10.43	17.23	12.88	6.56	631.23	891.26	1674.63	1909.37	1720.39	2805.73	2145.16	1065.71	3.04	4.3	8.18	8.96	7.98	13.32	10.0867	5.17333	-1.24255	0.00817805	0.049294
URS00009B2A05	'URS00009B2A05'	lncRNA	0	0	0	0.3	0	0.12	0.14	0	0	0	0	14.24	0	5.16	6.46667	0	0	0	0	0.25	0	0.09	0.113333	0	-5.37393	0.00817317	0.0492757
329427	'Chn1os3'	lncRNA	3.14	3.27	2.47	0.92	1.86	0.91	1.23	2.96	76.99	65.6	53.19	25.4	40.83	25.01	30.4133	65.26	2.58	2.58	1.92	0.75	1.42	0.7	0.956667	2.36	0.907136	0.00815604	0.0492058
URS00008C42DF	'URS00008C42DF'	lncRNA	0.04	0.06	0.07	0	0	0	0	0.0566667	4	5	6	0	0	0	0	5	0.04	0.04	0.05	0	0	0	0	0.0433333	4.54568	0.00814096	0.0491322
URS0000BDDECF	'URS0000BDDECF'	lncRNA	0.72	1.36	2.1	2.55	1.65	2.38	2.19333	1.39333	54.34	97.43	146.8	195.49	119.74	170.88	162.037	99.5233	0.6	1.07	1.63	2.08	1.26	1.84	1.72667	1.1	-0.943959	0.00804658	0.0487663
URS00009C5289	'URS00009C5289'	lncRNA	0.06	0.01	0.02	0.14	0.12	0.16	0.14	0.03	3.75	0.58	1.01	9.28	7.9	10.32	9.16667	1.78	0.05	0.01	0.01	0.11	0.09	0.13	0.11	0.0233333	-2.91105	0.00803647	0.0487161
76508	'Ube2d-ps'	lncRNA	5.62	10.91	6.84	5.36	5.34	3.45	4.71667	7.79	247.6	283.82	264.59	158.76	196.56	154.42	169.913	265.337	4.62	8.6	5.32	4.38	4.09	2.66	3.71	6.18	0.433212	0.00803107	0.0487026
77994	'Mir99ahg'	lncRNA	9.08	8.86	10.07	3.54	6.49	5.88	5.30333	9.33667	403.81	314.51	344.58	137.13	258.8	212.3	202.743	354.3	7.46	6.98	7.83	2.89	4.96	4.54	4.13	7.42333	0.607283	0.00791089	0.0480641
232685	'Lncpint'	lncRNA	57.24	64.92	61.65	72.34	61.67	66.09	66.7	61.27	2155.05	2301.85	2166.35	2733.5	2228.56	2402.6	2454.89	2207.75	47.02	51.18	47.94	59.04	47.17	51.09	52.4333	48.7133	-0.374018	0.00783564	0.0476504
URS00009C31D4	'URS00009C31D4'	lncRNA	0.05	0.02	0.05	0.1	0.11	0.15	0.12	0.04	6	2	5.85	12.08	13	17.11	14.0633	4.61667	0.04	0.01	0.04	0.08	0.09	0.12	0.0966667	0.03	-1.90338	0.00769298	0.0468899
URS00009C0A35	'URS00009C0A35'	lncRNA	2.41	2.09	2.15	1.09	1.37	1.03	1.16333	2.21667	110.48	91.36	91.4	51.4	60.97	45.48	52.6167	97.7467	1.98	1.65	1.67	0.89	1.05	0.8	0.913333	1.76667	0.69608	0.00756539	0.0462709
URS00009BD199	'URS00009BD199'	lncRNA	0.12	0.32	0.37	0.55	0.53	0.53	0.536667	0.27	7	18	20	33	30	30	31	15	0.1	0.25	0.29	0.45	0.4	0.41	0.42	0.213333	-1.27312	0.00753476	0.0461154
102635783	'Gm11266'	lncRNA	4.3	4.89	2.51	0.92	3	1.44	1.78667	3.9	226	237	143	53	141	90	94.6667	202	3.53	3.86	1.95	0.75	2.29	1.11	1.38333	3.11333	0.905036	0.00734052	0.0451443
672763	'Gm13710'	lncRNA	15.02	17.47	26.67	26.71	27.03	19.47	24.4033	19.72	673.92	742.63	1110.61	1228.93	1169.18	844.84	1080.98	842.387	12.33	13.78	20.74	21.8	20.67	15.05	19.1733	15.6167	-0.581834	0.00733866	0.0451433
URS00009B7136	'URS00009B7136'	lncRNA	0.83	1.14	1.69	5.58	1.29	2.09	2.98667	1.22	10.45	13.6	19.5	73.97	16.04	26.11	38.7067	14.5167	0.68	0.9	1.31	4.56	0.99	1.62	2.39	0.963333	-1.70895	0.00721453	0.044503
100504740	'Gm20383'	lncRNA	2.61	2.37	5.45	1.34	0.84	0.59	0.923333	3.47667	22	20	44	12	7	5	8	28.6667	2.15	1.87	4.24	1.1	0.64	0.46	0.733333	2.75333	1.61135	0.00715225	0.0441904
URS00009BF6D2	'URS00009BF6D2'	lncRNA	0.44	1.16	0.62	0.15	0.06	0.06	0.09	0.74	7	17.26	9	2.44	1	1	1.48	11.0867	0.36	0.91	0.48	0.12	0.05	0.05	0.0733333	0.583333	2.81942	0.00714514	0.044168
URS00009B125D	'URS00009B125D'	lncRNA	126.85	98.29	112.8	99.55	151.62	136.69	129.287	112.647	1621	1179	1315	1330	1900	1719	1649.67	1371.67	104.2	77.49	87.71	81.25	115.97	105.68	100.967	89.8	-0.468774	0.00708433	0.0438623
URS00009B32E9	'URS00009B32E9'	lncRNA	8.67	11.93	15.98	51.4	12.71	28.76	30.9567	12.1933	623.75	820.29	1071.26	3782.7	886.42	1983.68	2217.6	838.433	7.12	9.4	12.42	41.94	9.72	22.24	24.6333	9.64667	-1.66049	0.00699031	0.0434113
330427	'9330102E08Rik'	lncRNA	0.65	0.23	0.49	0.13	0.08	0.17	0.126667	0.456667	50	21	45	13	7	16	12	38.6667	0.53	0.19	0.38	0.11	0.06	0.13	0.1	0.366667	1.46749	0.00667908	0.0418485
URS00009B2258	'URS00009B2258'	lncRNA	2.51	2.65	2.68	2.83	2.91	3.16	2.96667	2.61333	209.24	210.68	208.21	241.1	234.65	252	242.583	209.377	2.06	2.09	2.09	2.31	2.22	2.44	2.32333	2.08	-0.429295	0.00667044	0.0418309
URS00009B02C8	'URS00009B02C8'	lncRNA	2.53	1.74	1.71	0.23	1.02	1.06	0.77	1.99333	253.65	167.47	160.25	23.91	98.76	101.74	74.8033	193.79	2.08	1.38	1.33	0.19	0.78	0.82	0.596667	1.59667	1.20029	0.00658821	0.0413965
URS00009C5AD8	'URS00009C5AD8'	lncRNA	0.04	0.02	0	0.27	0.11	0.18	0.186667	0.02	1.49	0.8	0	9.6	3.86	6.16	6.54	0.763333	0.04	0.02	0	0.22	0.09	0.14	0.15	0.02	-4.30298	0.00651377	0.0409771
77699	'9030616G12Rik'	lncRNA	8.22	5.7	3.42	5.63	14.63	13.94	11.4	5.78	48.03	30.45	17.67	35.45	85.16	83.09	67.9	32.05	6.76	4.5	2.66	4.6	11.19	10.78	8.85667	4.64	-1.28255	0.00649388	0.0408906
URS0000A1702E	'URS0000A1702E'	lncRNA	8.37	17.6	28.13	0.98	2.46	0.03	1.15667	18.0333	107.42	212.08	329.46	13.2	30.99	0.36	14.85	216.32	6.87	13.88	21.88	0.8	1.88	0.02	0.9	14.21	3.72136	0.00633551	0.0400828
75818	'4930478L05Rik'	lncRNA	4.8	5.57	5.73	5.04	6.36	6.83	6.07667	5.36667	333.08	364.55	365.76	343.01	418.77	442.4	401.393	354.463	3.94	4.39	4.45	4.12	4.87	5.28	4.75667	4.26	-0.392679	0.00627146	0.0397416
URS00009B7639	'URS00009B7639'	lncRNA	0.43	0.2	0.22	0.85	0.59	0.65	0.696667	0.283333	16	7.01	7.59	32	21	22.89	25.2967	10.2	0.36	0.16	0.17	0.69	0.45	0.5	0.546667	0.23	-1.53652	0.00627264	0.0397416
URS00009AFC31	'URS00009AFC31'	lncRNA	0.17	0.17	0.27	0.29	0.4	0.4	0.363333	0.203333	18	17	27	31	41	40	37.3333	20.6667	0.14	0.13	0.21	0.23	0.31	0.31	0.283333	0.16	-1.0663	0.00622535	0.0395306
320152	'4930412C18Rik'	lncRNA	3.2	2.75	1.36	1.61	1.6	1.55	1.58667	2.43667	168	152	111	76	83	73	77.3333	143.667	2.63	2.17	1.06	1.32	1.22	1.2	1.24667	1.95333	0.685324	0.00617183	0.0392429
URS00009B32B0	'URS00009B32B0'	lncRNA	39.92	49.15	62.88	197.79	54.04	113.28	121.703	50.65	3434.26	4042.41	5041.75	17382.1	4502.88	9327.77	10404.3	4172.81	32.79	38.75	48.9	161.42	41.33	87.58	96.7767	40.1467	-1.57111	0.0060733	0.0387829
319803	'A430090L17Rik'	lncRNA	1.52	1.72	1.81	3.19	1.8	2.48	2.49	1.68333	65	70	72	140	75	102	105.667	69	1.25	1.35	1.41	2.6	1.38	1.92	1.96667	1.33667	-0.845228	0.00604243	0.0386627
URS00009C1DC9	'URS00009C1DC9'	lncRNA	0	0.05	0.02	0.24	0.08	0.31	0.21	0.0233333	0	2	1	11.55	3.43	13.62	9.53333	1	0	0.04	0.02	0.2	0.06	0.24	0.166667	0.02	-3.41588	0.00596009	0.0382617
14955	'H19'	lncRNA	0.16	0.52	4.58	0.52	0.09	0.12	0.243333	1.75333	5	23	169	7	2	2	3.66667	65.6667	0.13	0.41	3.56	0.43	0.07	0.09	0.196667	1.36667	3.889	0.00590966	0.0379929
URS00009B64CB	'URS00009B64CB'	lncRNA	0	0	0.02	0.07	0.16	0.12	0.116667	0.00666667	0	0	1	4	8	6	6	0.333333	0	0	0.02	0.06	0.12	0.09	0.09	0.00666667	-4.26684	0.00586981	0.0378118
320268	'B930095G15Rik'	lncRNA	3.91	3.51	3.97	4.7	4.55	4.56	4.60333	3.79667	321.13	279.91	305.18	357.33	342.6	343.04	347.657	302.073	3.21	2.76	3.08	3.84	3.48	3.53	3.61667	3.01667	-0.418292	0.0057979	0.0374098
102640772	'2810414N06Rik'	lncRNA	2.72	2.63	2.45	0.89	1.5	1.18	1.19	2.6	89	78	71	30	49	38	39	79.3333	2.24	2.08	1.9	0.72	1.15	0.91	0.926667	2.07333	0.821047	0.00571123	0.0369759
URS00009B6574	'URS00009B6574'	lncRNA	1.02	1.24	1.24	1.92	1.33	1.5	1.58333	1.16667	92.29	107.6	104.39	177.48	116.66	129.87	141.337	101.427	0.84	0.98	0.96	1.57	1.02	1.16	1.25	0.926667	-0.704094	0.00558977	0.0363219
105246973	'4833439F03Rik'	lncRNA	2.58	4	2.65	4.11	5.44	3.94	4.49667	3.07667	163	224	156	266	303	179	249.333	181	2.12	3.15	2.06	3.36	4.16	3.04	3.52	2.44333	-0.672854	0.0055121	0.0359223
URS00009C0F8A	'URS00009C0F8A'	lncRNA	1.22	1.37	1.37	1.89	2.21	1.57	1.89	1.32	46	49	48	73	81	57	70.3333	47.6667	1	1.08	1.07	1.54	1.69	1.21	1.48	1.05	-0.77339	0.00519197	0.0342634
103012	'Firre'	lncRNA	28.91	34.72	29.71	18.94	26.2	24.49	23.21	31.1133	1857.69	2001.34	1971.3	1351.41	1526.83	1265.5	1381.25	1943.44	23.75	27.38	23.1	15.46	20.04	18.93	18.1433	24.7433	0.28035	0.00518407	0.0342197
URS0000AACB22	'URS0000AACB22'	lncRNA	13.71	13.19	14.94	5.55	10.41	4.36	6.77333	13.9467	248.84	226.17	249.26	104.46	184.6	77.23	122.097	241.423	11.26	10.4	11.61	4.53	7.96	3.37	5.28667	11.09	0.789126	0.00512444	0.0338849
100042166	'Gm3704'	lncRNA	6.15	5.53	3.87	1.44	3.45	1.47	2.12	5.18333	573.61	530.76	313.36	184.42	338.25	178.69	233.787	472.577	5.05	4.36	3.01	1.18	2.64	1.13	1.65	4.14	0.82627	0.00507479	0.0335983
URS00009BEA61	'URS00009BEA61'	lncRNA	5.12	4.59	4.85	8.12	6.37	7.2	7.23	4.85333	39.53	32.77	33.58	66.61	48.67	55.85	57.0433	35.2933	4.21	3.62	3.77	6.62	4.87	5.57	5.68667	3.86667	-0.919811	0.00500412	0.0332338
URS000076CFC5	'URS000076CFC5'	lncRNA	0.11	0.53	0.29	0.06	0.06	0.03	0.05	0.31	6.37	28	15	3.25	3.15	1.5	2.63333	16.4567	0.09	0.42	0.23	0.05	0.04	0.02	0.0366667	0.246667	2.58421	0.00498552	0.033139
URS00009B7A26	'URS00009B7A26'	lncRNA	2.61	2.84	0.89	6.45	2.92	6.63	5.33333	2.11333	15.39	15.33	4.66	40.96	17.16	39.85	32.6567	11.7933	2.14	2.24	0.69	5.26	2.23	5.12	4.20333	1.69	-1.72284	0.00494295	0.0329381
74034	'4632404H12Rik'	lncRNA	2.18	2.28	2.72	0.96	1.83	1.26	1.35	2.39333	274	274.01	319	123	223	151	165.667	289.003	1.79	1.8	2.12	0.78	1.4	0.97	1.05	1.90333	0.60008	0.00489803	0.0326797
69862	'1810064F22Rik'	lncRNA	1.53	1.15	2.46	0.28	0.88	0.65	0.603333	1.71333	42	30	61	8	22	15.4	15.1333	44.3333	1.25	0.91	1.91	0.23	0.67	0.5	0.466667	1.35667	1.36203	0.00476143	0.0319523
URS00009BCEEB	'URS00009BCEEB'	lncRNA	1.91	2.83	3.3	1.39	1.17	1.28	1.28	2.68	79.95	112.97	128.32	59.99	47.57	51.61	53.0567	107.08	1.57	2.23	2.56	1.14	0.89	0.99	1.00667	2.12	0.798136	0.00472799	0.0317519
URS00009B39CF	'URS00009B39CF'	lncRNA	0.73	0.87	0.6	0	0.17	0.11	0.0933333	0.733333	13.38	15.09	10.03	0	3	2	1.66667	12.8333	0.6	0.69	0.46	0	0.13	0.09	0.0733333	0.583333	2.73071	0.00471192	0.0316519
75060	'4930506C21Rik'	lncRNA	0.29	0.28	0.47	0.46	1.17	2.36	1.33	0.346667	14	13	7	21	21	46	29.3333	11.3333	0.24	0.22	0.36	0.38	0.9	1.83	1.03667	0.273333	-1.58576	0.00456954	0.0308432
URS00009C34A3	'URS00009C34A3'	lncRNA	3.76	4.58	4.04	5.13	4.28	5.16	4.85667	4.12667	416.73	485.47	418.06	580.3	458.75	547	528.683	440.087	3.09	3.61	3.14	4.19	3.27	3.99	3.81667	3.28	-0.486952	0.00440183	0.0299311
102638670	'4930578G10Rik'	lncRNA	7.87	13.85	14.36	15.93	12.21	13.06	13.7333	12.0267	304.06	477.02	479.98	707.45	443.83	587.89	579.723	420.353	6.46	10.92	11.17	13	9.34	10.1	10.8133	9.51667	-0.697069	0.00433328	0.0295631
URS00009C2928	'URS00009C2928'	lncRNA	0.19	0.22	0.1	0.57	0.27	0.32	0.386667	0.17	19.61	21.89	9.78	60.86	27.89	31.93	40.2267	17.0933	0.15	0.17	0.08	0.46	0.21	0.25	0.306667	0.133333	-1.4963	0.0043218	0.0294998
URS00009BFA92	'URS00009BFA92'	lncRNA	0.06	0.05	0.07	0	0	0	0	0.06	6	5.38	6.98	0	0	0	0	6.12	0.05	0.04	0.06	0	0	0	0	0.05	4.73184	0.00431946	0.0294914
URS00009BCAAB	'URS00009BCAAB'	lncRNA	0.99	1.09	0.93	1.02	1.5	1.51	1.34333	1.00333	90.56	95.67	79.64	95.47	133.49	132.54	120.5	88.6233	0.81	0.86	0.72	0.83	1.15	1.17	1.05	0.796667	-0.65563	0.00429507	0.0293625
URS00009AE19A	'URS00009AE19A'	lncRNA	0.37	0.39	0.56	0.75	0.73	0.74	0.74	0.44	22	22	31	46	42	42	43.3333	25	0.3	0.31	0.44	0.62	0.56	0.57	0.583333	0.35	-1.01273	0.00427601	0.0292547
URS0000CCBD73	'URS0000CCBD73'	lncRNA	0.65	0.35	0.68	1.39	1.21	1.35	1.31667	0.56	11.15	5.75	10.72	24.82	20.25	22.62	22.5633	9.20667	0.53	0.28	0.53	1.13	0.92	1.04	1.03	0.446667	-1.56018	0.00426577	0.0291922
72012	'1600020E01Rik'	lncRNA	17.28	18.82	11.16	9.18	13.07	12.8	11.6833	15.7533	353.28	386.58	335.85	397.67	403.67	424.78	408.707	358.57	14.19	14.84	8.68	7.49	10	9.89	9.12667	12.57	-0.403523	0.00411385	0.0283523
URS00009AFB50	'URS00009AFB50'	lncRNA	0.47	0.55	0.56	0.66	0.67	0.65	0.66	0.526667	96	109	107	139	132	128	133	104	0.38	0.44	0.43	0.54	0.51	0.51	0.52	0.416667	-0.571862	0.00411142	0.0283523
URS00009C0497	'URS00009C0497'	lncRNA	0.38	0.15	0.26	0.62	1	0.9	0.84	0.263333	8.09	3	5.05	13.8	20.97	18.62	17.7967	5.38	0.31	0.12	0.2	0.51	0.77	0.69	0.656667	0.21	-1.87397	0.00403124	0.0278807
URS00009B7F46	'URS00009B7F46'	lncRNA	0	0	0	0	0.45	0.41	0.286667	0	0	0	0	0	12.53	11.46	7.99667	0	0	0	0	0	0.34	0.32	0.22	0	-5.56069	0.00398582	0.0276167
URS00009B2503	'URS00009B2503'	lncRNA	0.22	0.11	0.08	0.27	0.51	0.39	0.39	0.136667	14.21	7	4.81	17.84	32.06	24.17	24.69	8.67333	0.18	0.09	0.06	0.22	0.39	0.3	0.303333	0.11	-1.73651	0.00380436	0.0265946
102639175	'Gm35546'	lncRNA	0.06	0.37	2.24	0.16	0	0.2	0.12	0.89	4	11	84	5	0	3	2.66667	33	0.05	0.29	1.74	0.13	0	0.15	0.0933333	0.693333	3.35105	0.00372318	0.0261161
URS0000A9873D	'URS0000A9873D'	lncRNA	19.96	52.76	69.58	1.3	10.47	0.7	4.15667	47.4333	919.22	2317.29	2977.54	61.23	468.06	30.91	186.733	2071.35	16.39	41.6	54.1	1.06	8.01	0.54	3.20333	37.3633	3.30962	0.00360382	0.0254127
218963	'Ubb-ps'	lncRNA	4.16	2.56	5.1	5.4	5.52	8.67	6.53	3.94	53.66	30.96	60.1	73.21	69.99	110.18	84.46	48.24	3.42	2.02	3.97	4.4	4.22	6.71	5.11	3.13667	-1.03535	0.00346956	0.0246551
76798	'Srrm4os'	lncRNA	0.28	0.19	0.11	0.55	0.37	0.34	0.42	0.193333	33	21	12	67	42	39	49.3333	22	0.23	0.15	0.08	0.45	0.28	0.27	0.333333	0.153333	-1.38028	0.00342965	0.0244302
102641467	'Gm20684'	lncRNA	10.87	10.04	12.16	5.19	8.22	5.66	6.35667	11.0233	318	278	299	120	218	168	168.667	298.333	8.93	7.91	9.46	4.24	6.29	4.38	4.97	8.76667	0.621966	0.00340089	0.0242772
100042056	'9130019P16Rik'	lncRNA	0.23	0.16	0.37	0.33	0.54	0.38	0.416667	0.253333	23	13	31	38	54	41	44.3333	22.3333	0.19	0.13	0.29	0.27	0.41	0.3	0.326667	0.203333	-1.19755	0.0033974	0.0242666
URS0000AA63A7	'URS0000AA63A7'	lncRNA	702.78	1813.89	1744.33	1746.01	1371.76	1676.89	1598.22	1420.33	1336.25	2892.06	2704.98	3848.71	2709.09	3565.84	3374.55	2311.1	577.28	1430.15	1356.37	1424.94	1049.24	1296.39	1256.86	1121.27	-0.781438	0.00338519	0.0241911
100165	'AI507597'	lncRNA	0.26	0.13	0.33	0.57	0.56	0.59	0.573333	0.24	12	4	14	27	25	26	26	10	0.21	0.1	0.25	0.46	0.43	0.45	0.446667	0.186667	-1.59448	0.00337494	0.0241438
URS00009B0845	'URS00009B0845'	lncRNA	5.87	6.34	5.94	7.31	7.35	7.66	7.44	6.05	114.88	117.29	107.08	148.08	140.32	145.86	144.753	113.083	4.82	5	4.62	5.96	5.62	5.92	5.83333	4.81333	-0.573003	0.00335812	0.0240492
102636491	'Gm33543'	lncRNA	6.33	4.3	6.37	8.78	5.55	11.07	8.46667	5.66667	256	149	211	395	203	415	337.667	205.333	5.2	3.39	4.96	7.16	4.25	8.56	6.65667	4.51667	-0.94441	0.00335609	0.0240412
URS00009AF01D	'URS00009AF01D'	lncRNA	0.48	0.21	0.27	0.62	1.06	0.89	0.856667	0.32	11.99	4.97	6.31	16.08	25.69	21.57	21.1133	7.75667	0.39	0.17	0.21	0.51	0.81	0.69	0.67	0.256667	-1.76092	0.00331683	0.0238433
URS00009ADAA9	'URS00009ADAA9'	lncRNA	0.4	0.32	0.36	0.6	0.54	0.57	0.57	0.36	43.34	32.84	36.03	66.35	56.34	58.29	60.3267	37.4033	0.33	0.25	0.28	0.49	0.41	0.44	0.446667	0.286667	-0.9132	0.0032571	0.0235218
URS00009B8428	'URS00009B8428'	lncRNA	0.09	0.01	0.04	0.35	0.14	0.15	0.213333	0.0466667	6.78	1.08	3.26	28.25	10.83	11.57	16.8833	3.70667	0.07	0.01	0.03	0.29	0.11	0.12	0.173333	0.0366667	-2.52147	0.00317209	0.0230326
URS00009B0CCC	'URS00009B0CCC'	lncRNA	0.07	0.19	0.04	0	0.03	0	0.01	0.1	16.1	41.41	9.02	0	6.75	0	2.25	22.1767	0.06	0.15	0.03	0	0.02	0	0.00666667	0.08	3.2929	0.003134	0.022812
105243043	'Gm39079'	lncRNA	5.54	6.6	7.71	7.56	8.07	8.45	8.02667	6.61667	127.22	144.29	164.76	178.28	179.68	186.79	181.583	145.423	4.55	5.2	6	6.17	6.17	6.53	6.29	5.25	-0.5376	0.00306964	0.0224109
URS00009B5AF9	'URS00009B5AF9'	lncRNA	2.6	3.48	3.1	1.68	1.4	1.74	1.60667	3.06	143	183	159	95	75	92	87.3333	161.667	2.13	2.74	2.41	1.37	1.07	1.35	1.26333	2.42667	0.667043	0.00305734	0.0223333
100503392	'4833438C02Rik'	lncRNA	1.36	1.57	1.8	0.6	0.86	0.75	0.736667	1.57667	68	75	84	31	42	36	36.3333	75.6667	1.11	1.24	1.4	0.49	0.66	0.58	0.576667	1.25	0.846502	0.00276289	0.0204515
URS00009BD0C0	'URS00009BD0C0'	lncRNA	3.28	2.38	4.18	6.76	4.05	9.61	6.80667	3.28	22	14.67	25	48.51	26.99	65.25	46.9167	20.5567	2.7	1.87	3.25	5.52	3.1	7.43	5.35	2.60667	-1.4169	0.00275067	0.0203894
320172	'E230016M11Rik'	lncRNA	8.37	3.66	2.84	1.54	2.26	1.83	1.87667	4.95667	251	117	91	54	62	61	59	153	6.87	2.88	2.21	1.25	1.73	1.41	1.46333	3.98667	1.17838	0.00270825	0.0201405
100503849	'Sp3os'	lncRNA	4.53	5.84	2.63	5.7	2.32	2.19	3.40333	4.33333	81.95	103.65	79.65	119.73	113.19	132.11	121.677	88.4167	3.72	4.61	2.05	4.65	1.78	1.69	2.70667	3.46	-0.686147	0.00269875	0.020094
URS0000A87A30	'URS0000A87A30'	lncRNA	0.31	0.59	0.56	0.02	0.21	0.02	0.0833333	0.486667	25.15	45.57	42.3	1.46	16.31	1.41	6.39333	37.6733	0.26	0.46	0.44	0.01	0.16	0.01	0.06	0.386667	2.46731	0.00264725	0.0197713
14455	'Gas5'	lncRNA	64.32	69.43	83.56	66.12	69.23	74.01	69.7867	72.4367	1098	1228	1352	1353	1305	1431	1363	1226	52.84	54.74	64.98	53.96	52.96	57.22	54.7133	57.52	-0.372191	0.00257996	0.0193937
URS0000A9B8C7	'URS0000A9B8C7'	lncRNA	21.43	52.65	66.82	1.1	10.22	1	4.10667	46.9667	2883.57	6780.35	8390.51	151.25	1330.72	128.01	536.66	6018.14	17.61	41.51	51.96	0.9	7.82	0.77	3.16333	37.0267	3.32437	0.00257024	0.0193261
URS00009B5111	'URS00009B5111'	lncRNA	1.3	1.03	0.87	1.57	1.66	1.85	1.69333	1.06667	60.03	45.35	37.2	74.28	74.34	81.96	76.86	47.5267	1.07	0.81	0.67	1.28	1.27	1.43	1.32667	0.85	-0.899817	0.00253657	0.0190994
URS0000A90A4B	'URS0000A90A4B'	lncRNA	13.9	33.4	37.97	0.81	6.98	0.66	2.81667	28.4233	620.36	1421.42	1574.67	37.29	302.41	28.26	122.653	1205.48	11.41	26.33	29.53	0.66	5.34	0.51	2.17	22.4233	3.13657	0.00246514	0.018661
URS00009C53F9	'URS00009C53F9'	lncRNA	138.91	138.75	185.46	138.76	154.63	211.58	168.323	154.373	336.95	288.95	374.67	383.15	385.44	560.75	443.113	333.523	114.1	109.4	144.21	113.24	118.27	163.57	131.693	122.57	-0.629828	0.00243387	0.018461
105246089	'C730014E05Rik'	lncRNA	61.43	54.01	54.48	31.85	39.06	35.37	35.4267	56.64	2215	1866	2061	1234	1505	1369	1369.33	2047.33	50.46	42.58	42.36	25.99	29.88	27.34	27.7367	45.1333	0.371615	0.0024027	0.0182726
URS00009BB624	'URS00009BB624'	lncRNA	1.79	1.32	1.16	0.69	0.73	0.59	0.67	1.42333	183	129	111	72	72	58	67.3333	141	1.47	1.04	0.9	0.56	0.56	0.46	0.526667	1.13667	0.859252	0.00240021	0.0182605
319336	'C130036L24Rik'	lncRNA	1.87	1.86	2.17	2.69	2.34	2.4	2.47667	1.96667	151.81	144.37	165.9	224.13	184.05	187.53	198.57	154.027	1.54	1.46	1.69	2.2	1.79	1.85	1.94667	1.56333	-0.591064	0.00237354	0.0181025
URS00009BAD6E	'URS00009BAD6E'	lncRNA	0.26	0.22	0.17	1.07	0.54	0.87	0.826667	0.216667	5	4	3	21	10	16	15.6667	4	0.22	0.18	0.13	0.87	0.41	0.67	0.65	0.176667	-2.19627	0.00236101	0.0180224
URS00009BB4DE	'URS00009BB4DE'	lncRNA	1.45	2.15	1.84	1.83	2.31	2.45	2.19667	1.81333	292	414	345	374	449	470	431	350.333	1.19	1.7	1.43	1.49	1.77	1.89	1.71667	1.44	-0.513722	0.00235139	0.0179644
URS00009BE47F	'URS00009BE47F'	lncRNA	0.26	0.1	0.14	1	0.6	0.37	0.656667	0.166667	8.01	2.81	3.84	31.67	17.95	10.97	20.1967	4.88667	0.21	0.08	0.11	0.82	0.46	0.29	0.523333	0.133333	-2.37474	0.00234855	0.0179482
URS00009BFC5A	'URS00009BFC5A'	lncRNA	7.09	10.24	12.79	21.32	10.2	14.76	15.4267	10.04	430.84	594.82	723.52	1326.95	601.2	860.57	929.573	583.06	5.82	8.08	9.94	17.4	7.8	11.41	12.2033	7.94667	-0.916489	0.00220639	0.0170176
83673	'Snhg1'	lncRNA	11.18	12.63	20.18	17.49	13.88	16.54	15.97	14.6633	329	313	487	595	407	599	533.667	376.333	9.19	9.95	15.69	14.28	10.62	12.78	12.56	11.61	-0.733748	0.0021896	0.0169372
URS00009B4C32	'URS00009B4C32'	lncRNA	0.99	0.86	1.08	0.35	0.45	0.51	0.436667	0.976667	73.97	61.38	75.01	26.54	32.86	36.27	31.89	70.12	0.81	0.68	0.84	0.28	0.35	0.39	0.34	0.776667	0.941058	0.00216767	0.016787
URS00009BE195	'URS00009BE195'	lncRNA	1.94	2.38	2.51	2.68	3.92	3.82	3.47333	2.27667	37	43	44	53	73	71	65.6667	41.3333	1.59	1.88	1.95	2.19	3	2.95	2.71333	1.80667	-0.879057	0.00210538	0.0164071
URS00009B710E	'URS00009B710E'	lncRNA	9.07	6.55	6.99	3.26	4.69	4.07	4.00667	7.53667	366	252	262	135	184	158	159	293.333	7.45	5.17	5.44	2.66	3.59	3.14	3.13	6.02	0.680961	0.00203148	0.0159361
URS00009B6931	'URS00009B6931'	lncRNA	6.1	6.86	7.14	7.89	7.42	8.34	7.88333	6.7	222.54	238.15	241.55	295.46	262.87	293.02	283.783	234.08	5.01	5.41	5.55	6.44	5.68	6.45	6.19	5.32333	-0.496897	0.00202403	0.0158959
URS00009AD002	'URS00009AD002'	lncRNA	0.94	0.86	0.83	0.16	0.13	0	0.0966667	0.876667	16.95	14.68	13.65	3.03	2.23	0	1.75333	15.0933	0.77	0.68	0.64	0.13	0.1	0	0.0766667	0.696667	2.8908	0.00198959	0.0156674
URS00009B5889	'URS00009B5889'	lncRNA	0.65	0.68	0.71	0.32	0.25	0.22	0.263333	0.68	52	52	53	26	19	17	20.6667	52.3333	0.53	0.54	0.55	0.26	0.19	0.17	0.206667	0.54	1.12164	0.00194727	0.0153887
330956	'Gm5122'	lncRNA	0.12	0	0.13	0.91	0.3	0.6	0.603333	0.0833333	2	0	2	17.45	5	13	11.8167	1.33333	0.1	0	0.1	0.74	0.23	0.47	0.48	0.0666667	-3.36593	0.00193434	0.0153138
URS00009C06D1	'URS00009C06D1'	lncRNA	0.69	0.63	0.61	0	0	0.19	0.0633333	0.643333	22.64	19.66	18.58	0	0	6.1	2.03333	20.2933	0.57	0.5	0.47	0	0	0.15	0.05	0.513333	3.07892	0.00191122	0.0151714
URS00009B4C3A	'URS00009B4C3A'	lncRNA	25.75	21.46	19.63	11.63	13.76	11.01	12.1333	22.28	485	382	340	227	253	202	227.333	402.333	21.15	16.92	15.26	9.49	10.53	8.51	9.51	17.7767	0.616935	0.0018651	0.014867
414095	'B130034C11Rik'	lncRNA	2.88	2.66	2.89	1.26	0.96	1.39	1.20333	2.81	83	88.09	87.25	42.45	38	45.7	42.05	86.1133	2.37	2.1	2.24	1.03	0.74	1.07	0.946667	2.23667	0.82852	0.0018628	0.0148575
URS00009B6E51	'URS00009B6E51'	lncRNA	0	0.01	0.01	0.22	0.04	0.17	0.143333	0.00666667	0	1	1	17	3	12.57	10.8567	0.666667	0	0.01	0.01	0.18	0.03	0.13	0.113333	0.00666667	-4.2531	0.00182713	0.0146258
URS00009AFAE7	'URS00009AFAE7'	lncRNA	0.4	0.53	0.49	0.03	0.06	0.13	0.0733333	0.473333	12.95	16.35	14.68	1.09	1.79	3.95	2.27667	14.66	0.33	0.42	0.38	0.03	0.04	0.1	0.0566667	0.376667	2.85231	0.00181557	0.0145464
URS00009C4F13	'URS00009C4F13'	lncRNA	0.18	0.15	0.04	0.66	0.24	0.69	0.53	0.123333	7.16	5.79	1.39	26.98	9.47	26.62	21.0233	4.78	0.15	0.12	0.03	0.54	0.19	0.53	0.42	0.1	-2.45608	0.00181558	0.0145464
URS00009ADD3A	'URS00009ADD3A'	lncRNA	3.25	2.47	2.19	0.68	1.52	0.91	1.03667	2.63667	106.79	77.3	66.78	23.15	48.6	28.86	33.5367	83.6233	2.67	1.95	1.7	0.56	1.16	0.7	0.806667	2.10667	1.13781	0.00178062	0.014344
105246959	'Gm42151'	lncRNA	0.57	0.42	0.42	0.1	0.18	0.2	0.16	0.47	55	39	38	10	17	18	15	44	0.47	0.33	0.33	0.08	0.14	0.15	0.123333	0.376667	1.34959	0.00168999	0.0137343
URS00009B9948	'URS00009B9948'	lncRNA	4.5	4.39	2.91	6.35	6.34	5.05	5.91333	3.93333	119	110	71	173	163	129	155	100	3.7	3.46	2.26	5.18	4.85	3.9	4.64333	3.14	-0.842847	0.00165023	0.0134317
654822	'D330041H03Rik'	lncRNA	2.56	2.82	3.39	1.28	1.68	1.39	1.45	2.92333	111	116	137	55	74	61	63.3333	121.333	2.1	2.22	2.63	1.05	1.28	1.08	1.13667	2.31667	0.726538	0.00161213	0.0131739
319982	'5930430L01Rik'	lncRNA	2.6	2.55	2.27	0.86	1.6	1.43	1.29667	2.47333	276	259	224	93	164.23	145	134.077	253	2.14	2.01	1.76	0.7	1.22	1.11	1.01	1.97	0.715456	0.00160366	0.0131168
URS00009C5547	'URS00009C5547'	lncRNA	20.07	30.15	16.12	107.39	53.95	38.25	66.53	22.1133	1478.07	2122	1105.94	8086	3851	2699.13	4878.71	1568.67	16.48	23.77	12.53	87.64	41.27	29.57	52.8267	17.5933	-1.87172	0.00149163	0.0123253
URS00009B31E6	'URS00009B31E6'	lncRNA	1.35	1.95	0.96	2.27	2.17	2.28	2.24	1.42	101	140	67	174	158	164	165.333	102.667	1.11	1.54	0.75	1.85	1.66	1.77	1.76	1.13333	-0.903192	0.00143858	0.0119648
URS00009B19B9	'URS00009B19B9'	lncRNA	0.43	0.47	0.59	0.68	0.89	1.33	0.966667	0.496667	23	24	29	37	46	68	50.3333	25.3333	0.36	0.37	0.46	0.56	0.68	1.03	0.756667	0.396667	-1.20596	0.00138619	0.0115942
URS000076762C	'URS000076762C'	lncRNA	1.12	1.56	1.56	1.8	2.2	1.92	1.97333	1.41333	61	81	79	100	116	100	105.333	73.6667	0.92	1.23	1.22	1.47	1.68	1.48	1.54333	1.12333	-0.730344	0.00132513	0.0111676
72575	'C430049B03Rik'	lncRNA	0.87	0.87	1.05	0.35	0.28	0.41	0.346667	0.93	32	37	45	7	10.9	17	11.6333	38	0.72	0.68	0.82	0.29	0.21	0.32	0.273333	0.74	1.52904	0.00130572	0.0110339
338360	'B430212C06Rik'	lncRNA	1.02	1.04	1.55	0.07	0.63	0.3	0.333333	1.20333	50.79	66	81	5	33	16	18	65.93	0.83	0.82	1.21	0.06	0.49	0.23	0.26	0.953333	1.67807	0.00129271	0.0109672
URS00009B1FFF	'URS00009B1FFF'	lncRNA	7.45	6.75	6.3	1.9	3.28	0.74	1.97333	6.83333	68.86	58.06	52.58	18.58	29.9	6.81	18.43	59.8333	6.12	5.32	4.9	1.55	2.51	0.57	1.54333	5.44667	1.5522	0.00128651	0.010932
115489488	'LOC115489488'	lncRNA	1.32	2.01	1.81	0.57	0.51	0.79	0.623333	1.71333	45	65	57	20	17	26	21	55.6667	1.09	1.58	1.41	0.47	0.39	0.61	0.49	1.36	1.18531	0.0012713	0.010827
URS00009B7354	'URS00009B7354'	lncRNA	0.87	0.78	0.33	2.65	0.7	2.67	2.00667	0.66	29.48	25.17	10.49	92.3	23.1	87.25	67.55	21.7133	0.71	0.62	0.26	2.16	0.54	2.06	1.58667	0.53	-1.89173	0.00126082	0.0107446
URS00009B6554	'URS00009B6554'	lncRNA	2.09	3.03	2.81	3.05	3.47	3.18	3.23333	2.64333	188.87	262.21	237.12	281.77	304	275.95	287.24	229.4	1.71	2.39	2.18	2.49	2.65	2.46	2.53333	2.09333	-0.540388	0.00122079	0.0104704
URS0000A89C94	'URS0000A89C94'	lncRNA	0.84	0.9	0.06	3.44	1.19	3.43	2.68667	0.6	10.84	10.87	0.74	46.46	15.12	43.54	35.04	7.48333	0.69	0.71	0.05	2.81	0.91	2.65	2.12333	0.483333	-2.60499	0.00120249	0.0103313
URS00009B7CB7	'URS00009B7CB7'	lncRNA	14.18	15.13	11.56	26.8	23.79	26.65	25.7467	13.6233	11.59	9.5	7.17	27.26	21.06	26.75	25.0233	9.42	11.65	11.93	8.99	21.87	18.2	20.61	20.2267	10.8567	-1.67158	0.00116665	0.0100481
17263	'Meg3'	lncRNA	0.93	2.09	1.5	2.15	1.5	2.72	2.12333	1.50667	20	26	36	69	36	73	59.3333	27.3333	0.76	1.65	1.16	1.75	1.14	2.11	1.66667	1.19	-1.35363	0.00116045	0.0100012
URS00009BC441	'URS00009BC441'	lncRNA	2.72	3.43	3.46	3.86	3.66	3.8	3.77333	3.20333	319.09	385.14	377.94	461.9	414.94	426.16	434.333	360.723	2.24	2.71	2.69	3.15	2.8	2.94	2.96333	2.54667	-0.487171	0.00113808	0.00985618
105244102	'Gm13421'	lncRNA	3.22	3.29	3.23	1.7	2.04	1.59	1.77667	3.24667	160	176	154	73	109	79	87	163.333	2.65	2.6	2.51	1.39	1.56	1.23	1.39333	2.58667	0.702147	0.00110491	0.0096158
URS00009BBD8B	'URS00009BBD8B'	lncRNA	1.55	2.03	1.23	0.1	0.22	0	0.106667	1.60333	14	17	10	1	2	0	1	13.6667	1.28	1.6	0.96	0.09	0.17	0	0.0866667	1.28	3.57001	0.00110095	0.00958758
100039706	'Gm2381'	lncRNA	0.27	0.3	0.24	0.44	0.36	0.42	0.406667	0.27	73.92	78.87	60.53	121	94.65	109.42	108.357	71.1067	0.22	0.24	0.18	0.36	0.27	0.33	0.32	0.213333	-0.837908	0.00108712	0.00948269
URS00009C5BE7	'URS00009C5BE7'	lncRNA	1.15	0.89	0.77	1.26	1.41	1.81	1.49333	0.936667	101	75	63	113.17	119.83	152	128.333	79.6667	0.95	0.7	0.6	1.03	1.08	1.4	1.17	0.75	-0.893761	0.0010846	0.00946383
102634670	'Gm32202'	lncRNA	4.22	2.34	5.94	0.97	1.43	0.96	1.12	4.16667	59	28	66	13	20	13	15.3333	51	3.47	1.84	4.62	0.79	1.09	0.74	0.873333	3.31	1.52914	0.00106667	0.00934409
URS00009C53C0	'URS00009C53C0'	lncRNA	0.27	0.33	0.29	0.46	0.6	0.48	0.513333	0.296667	30.19	34.55	30.3	51.8	63.58	50.71	55.3633	31.68	0.23	0.26	0.23	0.38	0.46	0.37	0.403333	0.24	-1.01362	0.00105191	0.009233
URS00009B0BDA	'URS00009B0BDA'	lncRNA	0	0.07	0	0.67	0.06	0.44	0.39	0.0233333	0	3.18	0	31	2.52	19.19	17.57	1.06	0	0.06	0	0.55	0.04	0.34	0.31	0.02	-4.37943	0.00104252	0.00915956
320977	'A330023F24Rik'	lncRNA	28.45	25.53	24.52	34.05	31.26	31.5	32.27	26.1667	2124	1988	1704	2693	2346	2168	2402.33	1938.67	23.37	20.13	19.06	27.79	23.91	24.35	25.35	20.8533	-0.524995	0.00100591	0.0089025
71581	'9130015A21Rik'	lncRNA	0	0.1	0.21	3.15	0.38	2.09	1.87333	0.103333	0	1	2	22	4	13	13	1	0	0.08	0.16	2.57	0.29	1.62	1.49333	0.08	-3.95771	0.000976365	0.00868141
URS00009BF456	'URS00009BF456'	lncRNA	3.47	3.06	3.07	4.22	3.59	4.86	4.22333	3.2	347.18	292.57	286.11	431.32	348.03	464.64	414.663	308.62	2.85	2.41	2.38	3.45	2.75	3.75	3.31667	2.54667	-0.644454	0.000970515	0.0086467
URS00009B2BE9	'URS00009B2BE9'	lncRNA	0.36	0.51	0.68	0.69	1.06	1.08	0.943333	0.516667	23	31	40.37	45	65.4	66	58.8	31.4567	0.3	0.4	0.53	0.56	0.81	0.84	0.736667	0.41	-1.11861	0.000968209	0.00862904
100039374	'Gm2192'	lncRNA	4.41	8.94	9.32	9.92	7.14	11.51	9.52333	7.55667	178	251	259	402	258	355	338.333	229.333	3.62	7.05	7.25	8.1	5.46	8.9	7.48667	5.97333	-0.792502	0.000958418	0.00855322
URS00009C042F	'URS00009C042F'	lncRNA	3.11	2.3	3.39	4.86	5.22	4.03	4.70333	2.93333	53	37	53	86	87	67	80	47.6667	2.55	1.81	2.63	3.96	3.99	3.11	3.68667	2.33	-0.95975	0.000878266	0.00793089
URS00009B9C8A	'URS00009B9C8A'	lncRNA	2.64	1.63	1.11	0	0.29	0.28	0.19	1.79333	26.01	15	9.92	0	2.84	2.72	1.85333	16.9767	2.17	1.29	0.86	0	0.22	0.21	0.143333	1.44	3.45517	0.000755418	0.00701896
URS00009B43E9	'URS00009B43E9'	lncRNA	0	0.18	0.09	1.04	0.2	0.7	0.646667	0.09	0	6	3	37.88	7	23.7	22.86	3	0	0.14	0.07	0.85	0.16	0.54	0.516667	0.07	-3.15688	0.000752636	0.00699994
URS00009BA157	'URS00009BA157'	lncRNA	0.29	0.19	0.23	0.02	0.02	0.02	0.02	0.236667	18	11	13	1	1	1	1	14	0.24	0.15	0.18	0.01	0.01	0.01	0.01	0.19	3.59952	0.000740776	0.00691425
76710	'2210406O10Rik'	lncRNA	0.42	0.28	0.39	0.99	0.73	0.74	0.82	0.363333	20	15	17	48	34	35	39	17.3333	0.34	0.22	0.3	0.8	0.56	0.57	0.643333	0.286667	-1.38973	0.000725877	0.00679184
URS00009C2DBB	'URS00009C2DBB'	lncRNA	1.92	0.54	1.88	0	0	0	0	1.44667	13.04	3.39	11.41	0	0	0	0	9.28	1.58	0.43	1.47	0	0	0	0	1.16	5.4057	0.000705113	0.00663952
URS00009AEC63	'URS00009AEC63'	lncRNA	0.2	0.1	0.15	0.61	0.33	0.46	0.466667	0.15	13	6.12	9	40	20.2	28.05	29.4167	9.37333	0.17	0.08	0.12	0.5	0.25	0.35	0.366667	0.123333	-1.87687	0.000696569	0.00657533
URS00009B592D	'URS00009B592D'	lncRNA	0.53	0.34	0.44	0.7	0.93	0.69	0.773333	0.436667	53.64	33.01	41.1	71.98	90.56	65.89	76.1433	42.5833	0.44	0.27	0.34	0.57	0.71	0.53	0.603333	0.35	-1.03656	0.000688194	0.00651011
URS00009C5217	'URS00009C5217'	lncRNA	22.81	50.14	56.87	629.65	55.45	292.72	325.94	43.2733	1060.47	2222.58	2456.51	30006.1	2501.56	13078.9	15195.5	1913.19	18.74	39.53	44.23	513.87	42.41	226.3	260.86	34.1667	-3.26406	0.000677338	0.00641881
URS00009B4B22	'URS00009B4B22'	lncRNA	1.68	1.11	1.14	0.24	0.4	0.4	0.346667	1.31	48	30	30	7	11	11	9.66667	36	1.38	0.87	0.88	0.19	0.3	0.31	0.266667	1.04333	1.69477	0.000651858	0.00620826
67585	'4930455J16Rik'	lncRNA	0.04	0.03	0.08	0.44	0.34	0.19	0.323333	0.05	1	3	3	17	13	12	14	2.33333	0.03	0.03	0.06	0.36	0.26	0.15	0.256667	0.04	-2.81046	0.000614145	0.00591675
URS00009B82D6	'URS00009B82D6'	lncRNA	0.67	0.16	0.25	0	0	0	0	0.36	19.26	4.41	6.6	0	0	0	0	10.09	0.55	0.13	0.19	0	0	0	0	0.29	5.52274	0.000602978	0.00581758
URS00009BA964	'URS00009BA964'	lncRNA	187.33	171.56	172.3	151.45	221.38	219.84	197.557	177.063	110	75	75	114	143	165	140.667	86.6667	153.87	135.27	133.98	123.6	169.33	169.96	154.297	141.04	-0.905027	0.000593199	0.0057357
URS00009B2C97	'URS00009B2C97'	lncRNA	8.8	6.01	8.42	11.44	10.88	17.44	13.2533	7.74333	62	39	53	86	76	124	95.3333	51.3333	7.23	4.74	6.55	9.33	8.32	13.49	10.38	6.17333	-1.10945	0.000574066	0.00557497
414068	'Bach2os'	lncRNA	1.21	2.67	2.55	2.07	1.14	0.72	1.31	2.14333	86	179	121	45	62	50	52.3333	128.667	0.99	2.11	1.98	1.69	0.87	0.55	1.03667	1.69333	1.08384	0.000568743	0.00552932
URS00009B5229	'URS00009B5229'	lncRNA	29.2	27.63	25.47	11.99	17.58	12.4	13.99	27.4333	311.2	275.19	246.38	134.29	184.2	130.86	149.783	277.59	23.99	21.78	19.81	9.79	13.44	9.59	10.94	21.86	0.689005	0.000554713	0.00541663
72203	'2610507I01Rik'	lncRNA	8.49	10.02	8.75	3.49	6.24	5.11	4.94667	9.08667	596.32	675.57	596.33	257.7	442.01	350.79	350.167	622.74	6.98	7.9	6.8	2.85	4.78	3.95	3.86	7.22667	0.62856	0.000540131	0.00530535
URS00009C1E22	'URS00009C1E22'	lncRNA	16.15	33.05	35.71	480.87	37.42	192.73	237.007	28.3033	593.59	1156.5	1216.96	18152.5	1335.89	6824.09	8770.83	989.017	13.27	26.06	27.76	392.44	28.62	149	190.02	22.3633	-3.42447	0.000518453	0.00512453
320176	'D930032P07Rik'	lncRNA	0	0	0	0.3	0.27	0.22	0.263333	0	0	0	0	7	7	6	6.66667	0	0	0	0	0.24	0.2	0.17	0.203333	0	-5.39438	0.000505203	0.00501964
URS00009B1BDF	'URS00009B1BDF'	lncRNA	0	0	0.03	0.27	0.39	0.12	0.26	0.01	0	0	1.19	11.47	15.79	5	10.7533	0.396667	0	0	0.02	0.22	0.3	0.1	0.206667	0.00666667	-5.05354	0.000495507	0.00494727
URS00009AFA33	'URS00009AFA33'	lncRNA	4.47	4.08	4.22	4.88	5.23	5.26	5.12333	4.25667	366.59	320.32	323.01	409.57	415.76	413.4	412.91	336.64	3.67	3.22	3.28	3.99	4	4.07	4.02	3.39	-0.506961	0.000492445	0.00492039
414085	'9330151L19Rik'	lncRNA	5.88	7.34	4.78	2.64	3.77	3.43	3.28	6	222	255	203	97	148	114	119.667	226.667	4.83	5.79	3.72	2.16	2.89	2.65	2.56667	4.78	0.715788	0.000477748	0.0047897
URS00009BA051	'URS00009BA051'	lncRNA	2.57	2.82	2.66	3.18	3.29	3.11	3.19333	2.68333	310.17	326.18	299.88	391.71	385	359.11	378.607	312.077	2.11	2.22	2.07	2.59	2.52	2.4	2.50333	2.13333	-0.494637	0.000459731	0.00462997
102631757	'Gm15318'	lncRNA	7.64	5.04	3.85	1.8	2.54	1.82	2.05333	5.51	228	153	110	62	78	56	65.3333	163.667	6.27	3.98	2.99	1.47	1.94	1.4	1.60333	4.41333	1.1261	0.000443309	0.00448153
URS00009AD073	'URS00009AD073'	lncRNA	0.98	0.76	0.79	1.38	1.53	2.34	1.75	0.843333	30.57	22.5	22.75	44.11	46.28	70.23	53.54	25.2733	0.81	0.6	0.61	1.12	1.17	1.81	1.36667	0.673333	-1.32526	0.000430163	0.00437519
327812	'Gm15663'	lncRNA	0.41	0.41	0.33	1.21	0.72	0.97	0.966667	0.383333	20	16	22	59	34	43	45.3333	19.3333	0.33	0.32	0.25	0.99	0.55	0.75	0.763333	0.3	-1.4563	0.000421029	0.00430387
URS00009B4363	'URS00009B4363'	lncRNA	9.28	10.71	16.65	57.04	17.69	37.32	37.35	12.2133	818.6	903.69	1369.63	5142.58	1512.61	3152.51	3269.23	1030.64	7.62	8.44	12.95	46.55	13.53	28.85	29.6433	9.67	-1.91759	0.000421052	0.00430387
URS00009B604D	'URS00009B604D'	lncRNA	6.74	12.59	19.88	150.81	19.81	67.92	79.5133	13.07	518.98	926.51	1426.32	11872.3	1478.1	5010.47	6120.29	957.27	5.53	9.92	15.46	123.07	15.15	52.51	63.5767	10.3033	-2.95008	0.000409691	0.00420386
URS00009BC1F4	'URS00009BC1F4'	lncRNA	0	0.73	1.06	2.52	1.91	3.08	2.50333	0.596667	0	9.9	13.97	37.94	26.94	43.49	36.1233	7.95667	0	0.58	0.82	2.06	1.46	2.38	1.96667	0.466667	-2.5115	0.00040462	0.00415706
URS00009BD51E	'URS00009BD51E'	lncRNA	0.8	0.64	0.98	0.05	0	0.05	0.0333333	0.806667	16	12	18	1	0	1	0.666667	15.3333	0.66	0.5	0.76	0.04	0	0.04	0.0266667	0.64	4.30314	0.000392287	0.00405338
URS00009B5E93	'URS00009B5E93'	lncRNA	0.31	0.14	0.12	0.55	0.41	0.66	0.54	0.19	29.57	13.03	10.97	54.01	37.74	59.76	50.5033	17.8567	0.25	0.11	0.1	0.45	0.31	0.51	0.423333	0.153333	-1.74053	0.000362793	0.00377793
URS00009B191D	'URS00009B191D'	lncRNA	0.03	0.06	0.03	0.22	0.33	0.17	0.24	0.04	1.77	3.45	2.03	14.52	20.53	10.84	15.2967	2.41667	0.02	0.04	0.03	0.18	0.25	0.13	0.186667	0.03	-3.08285	0.000328694	0.00346481
URS00009B268D	'URS00009B268D'	lncRNA	2.29	1.62	1.14	5.14	2.81	3.62	3.85667	1.68333	53.27	35.71	24.52	123.22	63.48	81.54	89.4133	37.8333	1.88	1.28	0.89	4.19	2.15	2.8	3.04667	1.35	-1.47508	0.000324478	0.00342986
URS00009BC646	'URS00009BC646'	lncRNA	2.37	2.48	2.8	3.27	3.67	3.26	3.4	2.55	111	111	122	157	167	147	157	114.667	1.94	1.96	2.18	2.67	2.81	2.52	2.66667	2.02667	-0.667412	0.000313975	0.00334271
URS00009B732E	'URS00009B732E'	lncRNA	1.99	1.97	2.11	3.17	2.74	3.62	3.17667	2.02333	62.75	59.14	61.73	102.95	84.24	110.52	99.2367	61.2067	1.63	1.55	1.64	2.58	2.1	2.8	2.49333	1.60667	-0.920895	0.000310276	0.00331127
URS00009B11F3	'URS00009B11F3'	lncRNA	0.43	0.27	0.56	0	0	0	0	0.42	10	6	12	0	0	0	0	9.33333	0.36	0.22	0.44	0	0	0	0	0.34	5.45062	0.000304417	0.00326181
URS00009B5115	'URS00009B5115'	lncRNA	0	0	0	0.24	0.23	0.11	0.193333	0	0	0	0	10.06	9.15	4.46	7.89	0	0	0	0	0.2	0.18	0.09	0.156667	0	-5.59655	0.000303135	0.00324937
URS00009B2D01	'URS00009B2D01'	lncRNA	2.42	2.44	4.28	1.08	1.26	0.71	1.01667	3.04667	71.87	68.79	117.71	33	36.33	20.28	29.87	86.1233	1.99	1.92	3.33	0.88	0.96	0.55	0.796667	2.41333	1.30785	0.000294361	0.00317833
71174	'4933416M06Rik'	lncRNA	1.19	0.86	0.58	0.24	0.19	0.17	0.2	0.876667	46	30	22	9	6	4	6.33333	32.6667	0.98	0.68	0.45	0.2	0.14	0.13	0.156667	0.703333	2.15721	0.000285287	0.00310172
URS00009B708D	'URS00009B708D'	lncRNA	0.16	0.52	0.25	0.03	0.09	0.07	0.0633333	0.31	25	75.44	35.41	4	12.58	10.21	8.93	45.2833	0.13	0.41	0.19	0.02	0.07	0.05	0.0466667	0.243333	2.16931	0.000261186	0.00288322
100380944	'Ino80dos'	lncRNA	6.97	6.86	7.68	4.03	5.15	4.98	4.72	7.17	886	781.82	840.63	460.17	527.99	556.19	514.783	836.15	5.72	5.41	5.97	3.29	3.94	3.85	3.69333	5.7	0.488742	0.000256337	0.0028384
URS0000AB0D0A	'URS0000AB0D0A'	lncRNA	0.59	0.47	0.6	0.92	0.95	1.07	0.98	0.553333	42	32	40	67	66	73	68.6667	38	0.48	0.37	0.47	0.75	0.73	0.82	0.766667	0.44	-1.06813	0.000242047	0.00270217
664862	'Gpr137b-ps'	lncRNA	2.19	4.08	3.14	1.13	1.74	1.24	1.37	3.13667	163	281	217	87	126	89	100.667	220.333	1.8	3.21	2.44	0.92	1.33	0.96	1.07	2.48333	0.919173	0.000232722	0.00261161
URS00009E252D	'URS00009E252D'	lncRNA	0.67	2.21	2.7	0	0.21	0.09	0.1	1.86	7.92	24.62	29.16	0	2.42	1.05	1.15667	20.5667	0.55	1.74	2.1	0	0.16	0.07	0.0766667	1.46333	4.10769	0.000227808	0.00257012
URS00009B15CB	'URS00009B15CB'	lncRNA	19.09	24.2	31.17	28.84	39.27	28.52	32.21	24.82	284.5	339.56	425.29	447.66	572.6	416.34	478.867	349.783	15.68	19.08	24.24	23.54	30.03	22.05	25.2067	19.6667	-0.666366	0.000222457	0.00252471
URS00009B4F20	'URS00009B4F20'	lncRNA	1.78	1.86	1.58	2.26	2.22	2.27	2.25	1.74	294.09	294.8	243.04	381.44	355.7	358.36	365.167	277.31	1.46	1.47	1.23	1.85	1.7	1.76	1.77	1.38667	-0.611595	0.000217107	0.00247406
URS00009AE31D	'URS00009AE31D'	lncRNA	71.46	104.55	116.38	714.62	133.42	403.43	417.157	97.4633	3461.26	4829.96	5239.08	35475.3	6270.69	18775.8	20174	4510.1	58.7	82.43	90.49	583.21	102.05	311.89	332.383	77.2067	-2.42095	0.000201074	0.00232461
105243469	'Gm27216'	lncRNA	31.18	32.22	26.97	35.16	33.75	31.33	33.4133	30.1233	497.89	588	407	736.8	729	594.63	686.81	497.63	25.61	25.4	20.97	28.69	25.81	24.22	26.24	23.9933	-0.678181	0.000191579	0.00222642
URS00009C0C5C	'URS00009C0C5C'	lncRNA	8.92	9.04	9.76	11.16	11.29	10.11	10.8533	9.24	696.99	675.13	710.78	890.8	854.36	756.05	833.737	694.3	7.33	7.13	7.59	9.1	8.63	7.81	8.51333	7.35	-0.480406	0.000187058	0.00218245
100038363	'F630028O10Rik'	lncRNA	1.53	2.21	2.79	0.73	1.16	0.96	0.95	2.17667	132	182	224	64	97	79	80	179.333	1.26	1.74	2.17	0.59	0.89	0.74	0.74	1.72333	0.951594	0.000176374	0.00207781
14910	'Gt(ROSA)26Sor'	lncRNA	3.83	5.53	6.23	7.15	8.59	8.85	8.19667	5.19667	84	105	140	154	173	182	169.667	109.667	3.15	4.36	4.84	5.83	6.57	6.84	6.41333	4.11667	-0.848116	0.000172034	0.00203298
69291	'1700001L05Rik'	lncRNA	7.86	8.88	5	3.14	4.89	2.7	3.57667	7.24667	500	591	379	195	310	186	230.333	490	6.46	7	3.89	2.56	3.74	2.09	2.79667	5.78333	0.889209	0.000169197	0.00200836
URS0000A8D8AA	'URS0000A8D8AA'	lncRNA	18.07	16.08	18.18	8.34	12.26	8.95	9.85	17.4433	916	778	857	433	603	436	490.667	850.333	14.84	12.68	14.14	6.8	9.38	6.92	7.7	13.8867	0.588676	0.000160609	0.00192355
102636207	'Gm33340'	lncRNA	5.45	3.91	4.02	22.49	11.52	10.68	14.8967	4.46	10	6	6	48	22	22	30.6667	7.33333	4.47	3.08	3.13	18.35	8.81	8.25	11.8033	3.56	-2.29168	0.000126964	0.00156202
102639588	'Gm11967'	lncRNA	16.31	15.46	12.96	8.31	5.75	5.6	6.55333	14.91	228.15	224.18	182	116	77	89	94	211.443	13.4	12.19	10.08	6.78	4.4	4.33	5.17	11.89	0.947993	0.000126398	0.00155649
100038755	'Gm9917'	lncRNA	3.43	4.07	3.91	5.39	4.15	5.11	4.88333	3.80333	223	235	200	319	275	307	300.333	219.333	2.82	3.21	3.04	4.4	3.17	3.95	3.84	3.02333	-0.671298	0.000125494	0.0015468
URS00009B39FA	'URS00009B39FA'	lncRNA	1.46	0.55	1.19	3.29	3.65	1.93	2.95667	1.06667	32.29	11.47	24.23	75.51	78.86	41.52	65.2967	22.6633	1.2	0.43	0.92	2.69	2.79	1.49	2.32333	0.85	-1.73915	0.000121752	0.00150764
102635020	'Gm32461'	lncRNA	55.78	38.4	37.08	10.42	20.58	14.03	15.01	43.7533	171	108	106	32	65	38	45	128.333	45.82	30.27	28.83	8.51	15.74	10.85	11.7	34.9733	1.32067	0.000112935	0.00141181
URS00009C1E2B	'URS00009C1E2B'	lncRNA	0.9	1.34	2.04	0.29	0.39	0.25	0.31	1.42667	26.86	37.96	56.11	8.93	11.29	7.32	9.18	40.31	0.74	1.06	1.59	0.24	0.3	0.2	0.246667	1.13	1.97717	0.000112564	0.00140827
73815	'4930404H11Rik'	lncRNA	4.47	4.43	3.23	0.43	1.38	1.85	1.22	4.04333	118.29	103.11	77.24	16	43.13	36.9	32.01	99.5467	3.67	3.49	2.51	0.35	1.06	1.43	0.946667	3.22333	1.45539	9.41471e-05	0.00120617
URS00009B2C55	'URS00009B2C55'	lncRNA	0.76	0.76	0.45	2.16	1.75	1.37	1.76	0.656667	20	19	11	59	45	35	46.3333	16.6667	0.62	0.6	0.35	1.77	1.34	1.06	1.39	0.523333	-1.69126	9.14505e-05	0.0011767
100043147	'Gm4262'	lncRNA	0.2	0.26	0.1	1.15	0.33	0.96	0.813333	0.186667	9.92	12.78	4.73	59.97	16.01	46.66	40.88	9.14333	0.16	0.21	0.08	0.94	0.25	0.74	0.643333	0.15	-2.51353	8.89433e-05	0.00115168
URS00009C16E3	'URS00009C16E3'	lncRNA	56.19	36.76	48.95	50.6	86.55	85.87	74.34	47.3	1386	860	1115	1288	2079	2052	1806.33	1120.33	46.16	28.98	38.06	41.3	66.2	66.38	57.96	37.7333	-0.888853	7.64213e-05	0.00101469
URS00009B87A7	'URS00009B87A7'	lncRNA	0.5	0.86	0.59	1	1.3	1.56	1.28667	0.65	33	54	36	67	83	98	82.6667	41	0.41	0.68	0.46	0.81	1	1.2	1.00333	0.516667	-1.2261	7.59324e-05	0.0010097
URS00009B51BD	'URS00009B51BD'	lncRNA	0.31	0.22	0.18	0.91	0.57	0.76	0.746667	0.236667	16.26	10.99	8.92	48.64	28.98	37.9	38.5067	12.0567	0.26	0.17	0.14	0.74	0.44	0.58	0.586667	0.19	-1.95322	7.46463e-05	0.000995583
URS00009C207F	'URS00009C207F'	lncRNA	73.35	86.82	98.62	199.95	93.93	154.56	149.48	86.2633	8059.21	9127.97	10108.2	22426	9993.08	16239	16219.4	9098.47	60.25	68.45	76.68	163.18	71.84	119.49	118.17	68.46	-1.07326	6.79685e-05	0.000920805
319743	'9630013D21Rik'	lncRNA	6.24	5.09	5.82	1.87	3.57	2.4	2.61333	5.71667	172	165	181	65	101	84	83.3333	172.667	5.12	4.01	4.52	1.52	2.73	1.86	2.03667	4.55	0.843747	6.72501e-05	0.000911536
100504360	'D730003I15Rik'	lncRNA	2.69	2.4	3.25	0.94	0.89	1.13	0.986667	2.78	65	68	82	21	30	27	26	71.6667	2.21	1.89	2.53	0.77	0.68	0.87	0.773333	2.21	1.25106	6.54901e-05	0.000889491
URS00009B92A3	'URS00009B92A3'	lncRNA	3.6	3.08	3.53	5.69	4.35	5.92	5.32	3.40333	156	127.49	142	253	183	247	227.667	141.83	2.95	2.43	2.74	4.64	3.32	4.58	4.18	2.70667	-0.905705	6.41372e-05	0.000874682
URS00009C0E98	'URS00009C0E98'	lncRNA	7.7	7.16	7.45	8.74	9.61	12.26	10.2033	7.43667	335	297	301	390	406	513	436.333	311	6.32	5.65	5.79	7.13	7.35	9.48	7.98667	5.92	-0.702467	5.41698e-05	0.000758149
URS00009BD00A	'URS00009BD00A'	lncRNA	1.66	0.69	0.49	3.13	2.91	3.64	3.22667	0.946667	25.7	10.09	7.03	50.53	44.17	55.19	49.9633	14.2733	1.36	0.54	0.38	2.56	2.23	2.81	2.53333	0.76	-2.03228	4.80966e-05	0.000683839
URS00009BBEA7	'URS00009BBEA7'	lncRNA	0.68	0.62	0.55	0.1	0.25	0.13	0.16	0.616667	58.08	50.9	44.07	8.6	20.7	10.53	13.2767	51.0167	0.56	0.49	0.43	0.08	0.19	0.1	0.123333	0.493333	1.80388	4.68573e-05	0.00066916
URS00009B21CE	'URS00009B21CE'	lncRNA	2.42	3.33	3.07	3.5	4.14	4.07	3.90333	2.94	186.96	246	221.18	276.47	310.66	301.34	296.157	218.047	1.98	2.62	2.39	2.85	3.17	3.14	3.05333	2.33	-0.657052	3.67497e-05	0.000544058
102800312	'Lncppara'	lncRNA	5.58	5.44	6.11	6.52	7.7	7.83	7.35	5.71	225.89	212.56	226.27	270.54	302.11	304.58	292.41	221.573	4.58	4.29	4.75	5.32	5.89	6.06	5.75667	4.54	-0.614745	3.32408e-05	0.000500452
666737	'4632427E13Rik'	lncRNA	7.55	9.22	8.97	10.01	10.21	9.71	9.97667	8.58	1005.95	1161.06	1115.87	1348.03	1317.4	1244.42	1303.28	1094.29	6.2	7.27	6.97	8.17	7.81	7.51	7.83	6.81333	-0.469963	3.27153e-05	0.000493936
URS00009B9C42	'URS00009B9C42'	lncRNA	88.69	102.15	106.19	152.03	108.9	169.14	143.357	99.01	4130.19	4536.47	4594.89	7257.95	4921.85	7570.95	6583.58	4420.52	72.85	80.54	82.57	124.07	83.3	130.76	112.71	78.6533	-0.802352	3.20156e-05	0.00048392
URS00009C0A80	'URS00009C0A80'	lncRNA	0.15	0.13	0.12	0.52	0.29	1	0.603333	0.133333	10.19	8.48	7.46	35.86	19	65.52	40.1267	8.71	0.12	0.1	0.09	0.42	0.22	0.78	0.473333	0.103333	-2.47691	3.03436e-05	0.000462583
212965	'BC024386'	lncRNA	205.81	178.34	135.91	54.12	107.88	61.48	74.4933	173.353	6906	5731	4267	1687	3447	1943	2359	5634.67	169.06	140.61	105.68	44.17	82.52	47.53	58.0733	138.45	1.06869	3.01749e-05	0.000460803
URS00009AE9C3	'URS00009AE9C3'	lncRNA	14.67	25.74	28.16	185.06	41.86	136.37	121.097	22.8567	102.47	165.71	175.72	1381.04	290.09	962.11	877.747	147.967	12.05	20.29	21.9	151.03	32.02	105.43	96.16	18.08	-2.83162	2.78407e-05	0.000431587
353504	'Dio3os'	lncRNA	1.86	1.9	3.05	0.28	0.57	0.83	0.56	2.27	35	46	51	9	8	13	10	44	1.52	1.5	2.37	0.23	0.43	0.64	0.433333	1.79667	1.91667	2.22539e-05	0.000354467
URS00009B7A1F	'URS00009B7A1F'	lncRNA	14.97	28.21	31.34	6.08	12.36	6.53	8.32333	24.84	206.58	365.99	395.28	87.59	167.11	88.42	114.373	322.617	12.3	22.24	24.37	4.97	9.46	5.05	6.49333	19.6367	1.29193	1.92199e-05	0.000313255
URS00009BD4B1	'URS00009BD4B1'	lncRNA	0.72	0.62	1.02	0.11	0.16	0.14	0.136667	0.786667	33	27	43	5	7	6	6	34.3333	0.59	0.49	0.79	0.09	0.12	0.11	0.106667	0.623333	2.30428	1.83211e-05	0.000300259
URS00009BAE25	'URS00009BAE25'	lncRNA	4.64	7.31	8.73	16.94	8.53	15.2	13.5567	6.89333	395.24	594.85	692.51	1473	703.43	1238.36	1138.26	560.867	3.81	5.76	6.79	13.82	6.53	11.75	10.7	5.45333	-1.26399	1.74935e-05	0.000289185
100038714	'Gm15401'	lncRNA	2.6	2.65	2.47	3.93	8.28	7.42	6.54333	2.57333	84	82	90	105	197	180	160.667	85.3333	2.14	2.09	1.92	3.2	6.33	5.73	5.08667	2.05	-1.11618	1.53636e-05	0.000258139
URS00009B3D03	'URS00009B3D03'	lncRNA	4.02	5.74	2.1	0.33	0.48	0	0.27	3.95333	34	45	16	3	4	0	2.33333	31.6667	3.3	4.52	1.63	0.27	0.37	0	0.213333	3.15	3.56084	1.34486e-05	0.000230616
URS00009C5583	'URS00009C5583'	lncRNA	0.83	0.98	0.44	1.9	1.64	1.82	1.78667	0.75	46.95	53	23	110	90	99	99.6667	40.9833	0.68	0.77	0.34	1.55	1.26	1.41	1.40667	0.596667	-1.50886	1.14428e-05	0.000200479
100041289	'Gm3255'	lncRNA	3.63	3.86	4.77	1.43	1.72	1.31	1.48667	4.08667	90.77	88.65	106.12	35.63	40.69	32.67	36.33	95.18	2.98	3.04	3.71	1.17	1.32	1.01	1.16667	3.24333	1.19505	1.03871e-05	0.000184777
399101	'Snhg3'	lncRNA	44.19	42.08	53.52	92.69	55.28	82.7	76.89	46.5967	420	358	426	932	501	778	737	401.333	36.3	33.17	41.62	75.64	42.28	63.93	60.6167	37.03	-1.1073	9.78452e-06	0.000175581
100503378	'Gm15638'	lncRNA	5.43	4.89	4.1	5.48	5.77	8.99	6.74667	4.80667	167	167	146	234	250	402	295.333	160	4.46	3.85	3.19	4.47	4.41	6.95	5.27667	3.83333	-1.09945	9.65137e-06	0.000173425
111002	'Marcksl1-ps4'	lncRNA	4.83	5.95	4.84	1.53	3.15	1.85	2.17667	5.20667	457	538	427	148	289	167	201.333	474	3.97	4.69	3.76	1.25	2.41	1.43	1.69667	4.14	1.03788	9.55518e-06	0.000172045
URS00009B141E	'URS00009B141E'	lncRNA	0.02	0.13	0.13	4.95	0.41	2.7	2.68667	0.0933333	1	5	5	205	16	105	108.667	3.66667	0.02	0.1	0.1	4.04	0.31	2.09	2.14667	0.0733333	-5.16416	8.50469e-06	0.000155976
URS00009B32CD	'URS00009B32CD'	lncRNA	11.18	12.38	11.04	27.21	16.99	19.06	21.0867	11.5333	121.39	125.67	108.87	310.3	181.32	204.7	232.107	118.643	9.19	9.76	8.59	22.21	13	14.73	16.6467	9.18	-1.20044	8.12078e-06	0.00014976
URS00009B0B2A	'URS00009B0B2A'	lncRNA	8.8	5.72	4.15	1.76	2.38	1.2	1.78	6.22333	381	236	167	78	100	50	76	261.333	7.23	4.51	3.23	1.43	1.82	0.93	1.39333	4.99	1.58775	7.53031e-06	0.000140131
100038659	'Mirt2'	lncRNA	1.51	2.19	1.99	4.39	4.25	3.24	3.96	1.89667	31	44	39	97	86	67	83.3333	38	1.24	1.73	1.55	3.58	3.25	2.5	3.11	1.50667	-1.35234	6.80303e-06	0.000128481
URS0000A68B0D	'URS0000A68B0D'	lncRNA	1.79	5.95	4.78	0.22	1.03	0.13	0.46	4.17333	38.95	122.82	95.96	5.01	21.93	2.64	9.86	85.91	1.47	4.69	3.72	0.18	0.79	0.1	0.356667	3.29333	2.99724	6.67244e-06	0.000126553
URS00009BF905	'URS00009BF905'	lncRNA	0.01	0	0	0.05	0.09	0.06	0.0666667	0.00333333	3	1	0	16.47	29.94	19.82	22.0767	1.33333	0.01	0	0	0.04	0.07	0.04	0.05	0.00333333	-4.19358	5.83792e-06	0.000112731
667931	'Gm8883'	lncRNA	31.8	38.62	28.66	54.25	43.17	45.5	47.64	33.0267	1349	1528	1166	2614	1838	1965	2139	1347.67	26.12	30.45	22.29	44.27	33.02	35.17	37.4867	26.2867	-0.889917	5.69401e-06	0.000110593
URS00009B75C7	'URS00009B75C7'	lncRNA	2.38	2.65	2.86	4.66	4.69	5.2	4.85	2.63	44.15	46.33	48.69	89.46	84.76	93.93	89.3833	46.39	1.96	2.09	2.22	3.8	3.59	4.02	3.80333	2.09	-1.16392	5.44522e-06	0.000106538
URS0000DE4D05	'URS0000DE4D05'	lncRNA	1.01	3.52	3.19	0.19	0.49	0.1	0.26	2.57333	21	69	61	4	10	2	5.33333	50.3333	0.83	2.77	2.48	0.15	0.38	0.08	0.203333	2.02667	3.03012	5.16705e-06	0.000101768
319711	'E230029C05Rik'	lncRNA	4.46	5.11	6.43	2.51	3.29	2.76	2.85333	5.33333	273.54	281	298.84	134.88	171.14	134.82	146.947	284.46	3.66	4.03	5	2.05	2.52	2.13	2.23333	4.23	0.746079	4.96263e-06	9.78861e-05
URS00009B5869	'URS00009B5869'	lncRNA	1.11	1.19	0.28	5.72	2.34	4.33	4.13	0.86	21.58	21.95	4.95	115.07	44.29	81.81	80.39	16.16	0.91	0.94	0.22	4.67	1.79	3.34	3.26667	0.69	-2.61122	4.64526e-06	9.23094e-05
381792	'2310040G24Rik'	lncRNA	3.53	4.61	3.99	0.52	1.06	0.6	0.726667	4.04333	44	36	37	7.11	8	6	7.03667	39	2.9	3.63	3.1	0.43	0.81	0.46	0.566667	3.21	2.2687	3.95576e-06	8.06182e-05
URS00009BB2C8	'URS00009BB2C8'	lncRNA	29.29	23.88	7.88	168.12	118.33	100.44	128.963	20.35	1685.46	1311.84	421.95	9904.64	6603.96	5546.48	7351.69	1139.75	24.06	18.83	6.13	137.2	90.51	77.65	101.787	16.34	-2.90095	3.88033e-06	7.93576e-05
URS00009B0264	'URS00009B0264'	lncRNA	247.6	284.46	306.43	238.45	413.69	304.1	318.747	279.497	347	324	341	397	611	492	500	337.333	203.39	224.28	238.28	194.6	316.42	235.1	248.707	221.983	-0.772132	2.40859e-06	5.19709e-05
URS00009C4569	'URS00009C4569'	lncRNA	2.23	1.51	1.82	4.65	4.99	7.04	5.56	1.85333	22	13.86	16.24	48.35	48.48	68.98	55.27	17.3667	1.83	1.19	1.41	3.8	3.82	5.44	4.35333	1.47667	-1.89811	1.66224e-06	3.75703e-05
URS00009BFABF	'URS00009BFABF'	lncRNA	221.4	237.77	232.71	240.84	439.21	289.35	323.133	230.627	1207	1181	1119	1420	2391	1617	1809.33	1169	181.86	187.47	180.95	196.55	335.94	223.7	252.063	183.427	-0.829723	1.6427e-06	3.71918e-05
URS00009BFC3A	'URS00009BFC3A'	lncRNA	37.65	42.17	47.28	74.24	53.72	64	63.9867	42.3667	2361.61	2526.05	2760.76	4765.26	3267.26	3849.82	3960.78	2549.47	30.92	33.24	36.77	60.59	41.09	49.48	50.3867	33.6433	-0.863122	1.51174e-06	3.44021e-05
102640440	'Gm28857'	lncRNA	5.26	5.86	4.36	18.71	8.88	14.48	14.0233	5.16	45.61	48.33	37.13	177.7	75.68	130.3	127.893	43.69	4.32	4.62	3.39	15.27	6.79	11.19	11.0833	4.11	-1.78873	1.46295e-06	3.34347e-05
66961	'Neat1'	lncRNA	459.17	739.44	639.11	889.48	945.96	855.63	897.023	612.573	41081	65619	53796	83842	85668	72352	80620.7	53498.7	377.17	583.01	496.97	725.91	723.55	661.49	703.65	485.717	-0.810877	1.3698e-06	3.16862e-05
URS00009B1D02	'URS00009B1D02'	lncRNA	0.04	0.11	0.15	0.82	0.34	0.59	0.583333	0.1	3.22	7.74	10	61.64	24.47	41.75	42.62	6.98667	0.04	0.09	0.11	0.67	0.26	0.46	0.463333	0.08	-2.89972	1.28616e-06	3.02235e-05
URS00009ADA4E	'URS00009ADA4E'	lncRNA	0.52	0.51	0.59	0	0	0	0	0.54	19	18	20.25	0	0	0	0	19.0833	0.42	0.4	0.46	0	0	0	0	0.426667	6.47623	1.24128e-06	2.92464e-05
URS00009C2EBA	'URS00009C2EBA'	lncRNA	1.33	1.72	1.28	5.95	2.72	3.41	4.02667	1.44333	56.8	69.76	50.54	259.82	112.64	139.59	170.683	59.0333	1.1	1.36	0.99	4.85	2.08	2.63	3.18667	1.15	-1.77877	1.0395e-06	2.50683e-05
231287	'Atp10d'	lncRNA	1.44	1.74	2.43	3.06	3.59	5.68	4.11	1.87	63.12	56.06	53	99.02	114.88	123.02	112.307	57.3933	1.18	1.37	1.89	2.5	2.75	4.39	3.21333	1.48	-1.17731	9.58368e-07	2.31958e-05
URS00009C219A	'URS00009C219A'	lncRNA	1.38	0.79	1.52	0	0	0	0	1.23	25.62	13.91	25.97	0	0	0	0	21.8333	1.14	0.63	1.19	0	0	0	0	0.986667	6.62337	9.3744e-07	2.2772e-05
100503380	'Snhg4'	lncRNA	23.01	22.62	22.54	47.32	30.78	47.54	41.88	22.7233	332	313	317	693	429	643	588.333	320.667	18.9	17.83	17.53	38.61	23.54	36.75	32.9667	18.0867	-1.10228	8.40098e-07	2.06712e-05
408057	'BC039771'	lncRNA	3.18	3.77	4.12	4.03	6.67	6.28	5.66	3.69	281.02	324.95	338	373	568.91	528.69	490.2	314.657	2.61	2.98	3.2	3.29	5.11	4.86	4.42	2.93	-0.848107	7.60049e-07	1.89288e-05
215458	'Gm43915'	lncRNA	2.32	2.97	3.08	3.27	4.49	4.43	4.06333	2.79	219	268	271	315	410	400	375	252.667	1.91	2.34	2.39	2.67	3.43	3.42	3.17333	2.21333	-0.782207	7.45671e-07	1.86404e-05
URS0000A8903B	'URS0000A8903B'	lncRNA	4.63	9.52	11.15	26.21	15.8	43.2	28.4033	8.43333	12.34	21.98	24.93	78.97	43.1	124.72	82.2633	19.75	3.8	7.51	8.67	21.39	12.09	33.4	22.2933	6.66	-2.34034	7.33746e-07	1.84114e-05
URS00009B00B7	'URS00009B00B7'	lncRNA	0.33	0.46	0.54	0.8	0.93	0.9	0.876667	0.443333	42	56	64.04	103	114	108	108.333	54.0133	0.27	0.37	0.42	0.65	0.71	0.69	0.683333	0.353333	-1.22124	7.26659e-07	1.82852e-05
URS00009B1CC4	'URS00009B1CC4'	lncRNA	16.63	15.34	17.61	22.92	22.01	21.47	22.1333	16.5267	1025.97	903.45	1010.91	1446.98	1316.07	1269.87	1344.31	980.11	13.66	12.09	13.69	18.71	16.83	16.6	17.38	13.1467	-0.672981	6.09726e-07	1.55931e-05
102638507	'Gm26684'	lncRNA	4.75	3.03	3.12	0.75	1.33	1.36	1.14667	3.63333	764.13	595.28	486.57	162.61	280.38	255.35	232.78	615.327	3.9	2.39	2.42	0.62	1.02	1.05	0.896667	2.90333	1.20739	5.95538e-07	1.53332e-05
URS00009BCBEC	'URS00009BCBEC'	lncRNA	2.21	2.47	3.01	4.12	3.84	3.98	3.98	2.56333	151.07	161.14	191.33	287.64	254.21	260.2	267.35	167.847	1.82	1.95	2.34	3.36	2.94	3.07	3.12333	2.03667	-0.891384	5.82813e-07	1.50638e-05
319673	'9330159M07Rik'	lncRNA	3.21	4.75	2.95	7.16	4.48	6.38	6.00667	3.63667	191.36	227.55	149.98	437.41	295.15	399.47	377.343	189.63	2.64	3.75	2.3	5.85	3.43	4.93	4.73667	2.89667	-1.2199	5.63171e-07	1.46128e-05
URS00009BBE62	'URS00009BBE62'	lncRNA	5.02	6.18	5.93	6.75	7.3	8.1	7.38333	5.71	692.5	816.56	763.76	949.11	974.8	1067.66	997.19	757.607	4.12	4.88	4.61	5.51	5.59	6.26	5.78667	4.53667	-0.613689	5.43479e-07	1.41709e-05
100504539	'Gm20275'	lncRNA	5.59	6	5.67	8.52	8.11	9.68	8.77	5.75333	199.88	205.03	188.58	307	281.48	327.7	305.393	197.83	4.59	4.73	4.41	6.95	6.2	7.48	6.87667	4.57667	-0.84532	4.74128e-07	1.25842e-05
URS00009BDE50	'URS00009BDE50'	lncRNA	1.38	0.47	0.39	2.97	2.62	3.32	2.97	0.746667	159.71	51.54	41.93	350.44	293.47	367.02	336.977	84.3933	1.13	0.37	0.3	2.42	2.01	2.57	2.33333	0.6	-2.20791	4.18713e-07	1.12934e-05
URS00009B85A3	'URS00009B85A3'	lncRNA	3.74	2.87	2.36	6.96	5.78	6.1	6.28	2.99	146.51	107.06	85.73	279.91	219.85	230	243.253	113.1	3.07	2.26	1.83	5.68	4.42	4.71	4.93667	2.38667	-1.32117	4.03787e-07	1.09462e-05
URS00009C0C19	'URS00009C0C19'	lncRNA	7.83	9.67	13.19	28.1	14.2	26.15	22.8167	10.23	677.49	800.71	1064.42	2485.03	1190.86	2166.49	1947.46	847.54	6.43	7.63	10.26	22.93	10.86	20.22	18.0033	8.10667	-1.44082	3.05696e-07	8.57493e-06
URS00009ADB0D	'URS00009ADB0D'	lncRNA	37.62	82.32	73.6	148.33	87.72	204.16	146.737	64.5133	44.15	77.08	67.54	209.91	109.45	282.09	200.483	62.9233	30.9	64.9	57.23	121.05	67.09	157.84	115.327	51.01	-1.91124	3.04268e-07	8.54386e-06
102633856	'Gm31583'	lncRNA	27.93	17.81	10.57	4.87	6.11	5.43	5.47	18.77	1945	1194	714	303	402	391	365.333	1284.33	22.94	14.04	8.22	3.97	4.67	4.2	4.28	15.0667	1.6191	2.71864e-07	7.73174e-06
100041562	'Gm14762'	lncRNA	0.08	0.12	0.03	0.38	0.52	0.89	0.596667	0.0766667	6	5	2	28	28	59	38.3333	4.33333	0.06	0.1	0.02	0.31	0.4	0.69	0.466667	0.06	-3.35912	1.41586e-07	4.33179e-06
URS00009C2506	'URS00009C2506'	lncRNA	3.29	7.17	8.14	28.86	19.65	46.26	31.59	6.2	271.49	566.12	626.21	2434.22	1571.44	3655.78	2553.81	487.94	2.7	5.66	6.33	23.55	15.03	35.76	24.78	4.89667	-2.6278	1.11131e-07	3.53038e-06
69857	'1810053B23Rik'	lncRNA	6.11	5.08	5.56	1.92	0.79	1.87	1.52667	5.58333	185	164	160	58	25	48.95	43.9833	169.667	5.02	4.01	4.32	1.57	0.6	1.45	1.20667	4.45	1.73015	1.04615e-07	3.33625e-06
329271	'C230024C17Rik'	lncRNA	1.48	1.36	1.7	0.03	0	0	0.01	1.51333	44	38	47	1	0	0	0.333333	43	1.22	1.07	1.32	0.02	0	0	0.00666667	1.20333	6.69296	8.76007e-08	2.85377e-06
101056219	'Urml'	lncRNA	51.04	69.72	99.01	154.25	93.1	159.93	135.76	73.2567	1290.66	1532.57	1976.2	3715.14	2300.26	3671.79	3229.06	1599.81	41.93	54.97	76.99	125.89	71.21	123.64	106.913	57.9633	-1.24741	8.46433e-08	2.77098e-06
433281	'Gm5524'	lncRNA	15.8	12.75	13.58	3.16	6.35	2.98	4.16333	14.0433	383	293	304	79	150	70	99.6667	326.667	12.98	10.05	10.56	2.58	4.86	2.3	3.24667	11.1967	1.5196	4.92885e-08	1.70799e-06
100038525	'Gm10804'	lncRNA	1.82	0.87	6.54	0.06	0.26	0.25	0.19	3.07667	91	36	170	3	13	8	8	99	1.49	0.69	5.08	0.05	0.2	0.19	0.146667	2.42	3.42969	3.68485e-08	1.31804e-06
URS00009B61DE	'URS00009B61DE'	lncRNA	0.74	0.69	0.19	2.88	2.92	3.16	2.98667	0.54	12.67	11.14	2.94	51.33	49.02	53.02	51.1233	8.91667	0.61	0.54	0.14	2.35	2.23	2.44	2.34	0.43	-2.82274	3.23595e-08	1.17964e-06
100503619	'E330011O21Rik'	lncRNA	5.71	4.36	5.75	0.86	1.72	1.72	1.43333	5.27333	140	106	140	21	43	39	34.3333	128.667	4.69	3.44	4.47	0.71	1.32	1.33	1.12	4.2	1.70286	3.04695e-08	1.11655e-06
105244841	'Gm40376'	lncRNA	9.21	18.05	33.42	0.2	0.78	1.04	0.673333	20.2267	336	924.31	1673.93	11.34	41.05	54	35.4633	978.08	7.56	14.23	25.99	0.17	0.6	0.8	0.523333	15.9267	4.57327	3.05032e-08	1.11655e-06
URS00009C1F03	'URS00009C1F03'	lncRNA	0.79	1.37	0.71	10.58	3.96	8.23	7.59	0.956667	5	8	4	72	25	53	50	5.66667	0.65	1.08	0.55	8.63	3.03	6.36	6.00667	0.76	-3.38001	2.16465e-08	8.18208e-07
100503447	'Gm19696'	lncRNA	11.97	12.09	10.4	14.96	19.35	18.6	17.6367	11.4867	304	283	224	404	502.02	499	468.34	270.333	9.83	9.53	8.08	12.21	14.8	14.38	13.7967	9.14667	-1.00015	1.75901e-08	6.80319e-07
URS00009BC9CD	'URS00009BC9CD'	lncRNA	0.47	0.88	0.99	1.71	1.9	2.9	2.17	0.78	38	69	75	143	150	227	173.333	60.6667	0.38	0.7	0.77	1.4	1.45	2.24	1.69667	0.616667	-1.7388	1.74546e-08	6.76061e-07
791299	'Gm10069'	lncRNA	9.02	10.77	6.9	3.79	8.05	9.71	7.18333	8.89667	251	262	219	53	102	90	81.6667	244	7.41	8.49	5.37	3.09	6.16	7.51	5.58667	7.09	1.37687	1.45244e-08	5.70022e-07
320014	'B930025P03Rik'	lncRNA	4.81	3.75	5.27	11.66	7.64	13.37	10.89	4.61	212.99	162.19	175.16	479.33	307.99	532.03	439.783	183.447	3.95	2.96	4.1	9.52	5.84	10.34	8.56667	3.67	-1.48702	7.96646e-09	3.29643e-07
URS00009C1D53	'URS00009C1D53'	lncRNA	3.27	3.24	2.51	0.85	1.12	0.87	0.946667	3.00667	206.93	196	148	55	69	53	59	183.643	2.69	2.56	1.95	0.69	0.86	0.68	0.743333	2.4	1.42937	5.74542e-09	2.4187e-07
URS00009B03E3	'URS00009B03E3'	lncRNA	1.98	2.54	1.23	3.54	5.99	5.02	4.85	1.91667	394.97	484.55	229.33	718.55	1155.84	955.91	943.433	369.617	1.63	2	0.96	2.89	4.58	3.88	3.78333	1.53	-1.55248	4.84812e-09	2.07372e-07
107350	'AW112010'	lncRNA	68.67	82.11	87.82	36.63	42.62	33.12	37.4567	79.5333	759	849	882	425	463	362	416.667	830	56.41	64.74	68.29	29.89	32.6	25.6	29.3633	63.1467	0.779974	4.64312e-09	1.99564e-07
100040507	'Gm2814'	lncRNA	1.65	1.34	1.73	4.14	3.06	5.67	4.29	1.57333	80	62	78	206	144	264	204.667	73.3333	1.36	1.06	1.35	3.38	2.34	4.38	3.36667	1.25667	-1.70435	3.82341e-09	1.67852e-07
URS0000766AE8	'URS0000766AE8'	lncRNA	0.06	0.12	0.09	2.82	0.33	1.19	1.44667	0.09	3.5	7	5.5	181.18	20.01	72	91.0633	5.33333	0.05	0.09	0.07	2.3	0.25	0.92	1.15667	0.07	-4.4506	3.48552e-09	1.54289e-07
URS00009BB40A	'URS00009BB40A'	lncRNA	7.51	6.5	9.3	20.7	12.31	20.87	17.96	7.77	583.44	483.18	673.85	1644.56	927.3	1553.37	1375.08	580.157	6.17	5.13	7.24	16.89	9.42	16.13	14.1467	6.18	-1.47689	3.05711e-09	1.36231e-07
URS00009E46E9	'URS00009E46E9'	lncRNA	3.74	7.51	10.93	0.16	1.15	0.33	0.546667	7.39333	45.62	85.76	121.31	2.01	13.72	4	6.57667	84.23	3.08	5.92	8.5	0.13	0.88	0.26	0.423333	5.83333	3.52282	2.75733e-09	1.24327e-07
URS0000A93E7B	'URS0000A93E7B'	lncRNA	1.15	0.91	1.05	2	2.65	2.9	2.51667	1.03667	60	45.31	51	106.98	133.99	145.17	128.713	52.1033	0.95	0.72	0.82	1.64	2.03	2.24	1.97	0.83	-1.50883	2.54953e-09	1.15741e-07
URS00009BF89A	'URS00009BF89A'	lncRNA	135.25	154.81	228.89	377.73	284.25	362.21	341.397	172.983	18723.6	20515.7	29575.8	53340.7	38087.4	47907.3	46445.1	22938.4	111.1	122.06	177.98	308.27	217.42	280.02	268.57	137.047	-1.24837	1.46795e-09	6.98534e-08
115486954	'Gm15889'	lncRNA	23.47	24.77	19.52	4.98	9.44	6.04	6.82	22.5867	662	614	530	230	244	142	205.333	602	19.28	19.53	15.18	4.07	7.22	4.67	5.32	17.9967	1.34323	1.24559e-09	6.04601e-08
URS00009B0955	'URS00009B0955'	lncRNA	0.34	0.43	0.37	0.94	0.98	1.15	1.02333	0.38	32	39	33	91	90	105	95.3333	34.6667	0.28	0.34	0.29	0.76	0.75	0.89	0.8	0.303333	-1.67615	9.3978e-10	4.70738e-08
414125	'F930017D23Rik'	lncRNA	0.4	0.35	0.22	0.92	1.3	1.22	1.14667	0.323333	14	18	11	51	68	63	60.6667	14.3333	0.33	0.28	0.17	0.75	0.99	0.94	0.893333	0.26	-2.29065	9.17294e-10	4.6034e-08
URS00009BEDCB	'URS00009BEDCB'	lncRNA	132.77	137.23	130.98	171.09	237.33	171.05	193.157	133.66	512	472	436	728	924	693	781.667	473.333	109.06	108.19	101.85	139.63	181.53	132.24	151.133	106.367	-0.929987	4.15622e-10	2.24201e-08
URS00009B7A02	'URS00009B7A02'	lncRNA	4.09	4.15	4.28	5.25	5.77	5.59	5.53667	4.17333	954.97	926.94	932.8	1248.77	1302.98	1243.36	1265.04	938.237	3.36	3.27	3.33	4.29	4.42	4.32	4.34333	3.32	-0.645499	3.97178e-10	2.14686e-08
URS00009BAC0E	'URS00009BAC0E'	lncRNA	0.08	0.15	0.14	1.3	0.49	0.79	0.86	0.123333	8.63	15.34	14	141.01	50.32	79.78	90.37	12.6567	0.07	0.12	0.11	1.06	0.37	0.61	0.68	0.1	-3.11234	3.75778e-10	2.04745e-08
100504628	'Gm20319'	lncRNA	79.36	58.32	63.16	17.76	29.87	28.76	25.4633	66.9467	2719	1928	2047	590	939	870	799.667	2231.33	65.19	45.98	49.11	14.49	22.85	22.23	19.8567	53.4267	1.28102	2.36099e-10	1.33014e-08
URS00009B04DA	'URS00009B04DA'	lncRNA	4.57	3.03	3.08	8.3	7.62	10.65	8.85667	3.56	381.25	241.97	239.33	707.94	616.79	851.11	725.28	287.517	3.75	2.39	2.39	6.77	5.83	8.23	6.94333	2.84333	-1.54856	1.4856e-10	8.62487e-09
URS00009C1B91	'URS00009C1B91'	lncRNA	1.02	0.7	0.7	2.94	2.89	2.62	2.81667	0.806667	32.49	21.34	20.84	96.76	90.03	80.78	89.19	24.89	0.83	0.55	0.55	2.4	2.21	2.02	2.21	0.643333	-2.07722	1.23168e-10	7.29374e-09
URS00009BABD9	'URS00009BABD9'	lncRNA	0.26	0.37	0.65	1.31	1.41	2.05	1.59	0.426667	24.17	32.35	55.83	123.11	126.12	180.66	143.297	37.45	0.22	0.29	0.5	1.07	1.08	1.58	1.24333	0.336667	-2.17496	8.01382e-11	4.92056e-09
74161	'Ctcflos'	lncRNA	6.04	5.54	8.39	17.27	11.8	16.14	15.07	6.65667	158.35	132.45	174.93	417.82	291.82	379.72	363.12	155.243	4.96	4.37	6.52	14.1	9.02	12.48	11.8667	5.28333	-1.45277	6.64315e-11	4.14582e-09
URS00009B2623	'URS00009B2623'	lncRNA	5.84	5.41	6.14	17.99	9.81	19.34	15.7133	5.79667	788.61	699.65	773.89	2478.38	1281.79	2495.66	2085.28	754.05	4.8	4.27	4.77	14.68	7.5	14.95	12.3767	4.61333	-1.69976	6.64079e-11	4.14582e-09
URS00009C262C	'URS00009C262C'	lncRNA	54.18	45.29	55.49	107.39	94.97	86.21	96.19	51.6533	326.91	250.23	296.94	697.11	570.64	529.85	599.2	291.36	44.5	35.71	43.15	87.64	72.64	66.65	75.6433	41.12	-1.26006	5.50589e-11	3.4768e-09
100038464	'Gm15441'	lncRNA	0.67	0.36	1.19	2.62	12.21	21.86	12.23	0.74	8	4	13	33	144	259	145.333	8.33333	0.55	0.28	0.92	2.14	9.34	16.9	9.46	0.583333	-4.329	3.62882e-11	2.40549e-09
69443	'1700027J07Rik'	lncRNA	0.43	0.67	0.6	3.01	2.17	2.53	2.57	0.566667	18	28	21	114	76	89	93	22.3333	0.36	0.53	0.47	2.46	1.66	1.95	2.02333	0.453333	-2.28455	3.58489e-11	2.3823e-09
URS00009BA29F	'URS00009BA29F'	lncRNA	0.26	0.28	0.04	3.61	1.4	2.9	2.63667	0.193333	7.82	7.92	1.21	111.12	40.63	83.79	78.5133	5.65	0.21	0.22	0.03	2.95	1.07	2.24	2.08667	0.153333	-4.19564	1.28482e-11	9.17908e-10
100503265	'Gm19619'	lncRNA	13.73	12.47	15.99	2.24	3.55	3.52	3.10333	14.0633	163	131	187	30	46	42	39.3333	160.333	11.27	9.83	12.44	1.83	2.71	2.72	2.42	11.18	1.81834	1.12612e-11	8.11171e-10
100503307	'Gm15408'	lncRNA	11.51	11.4	8.77	2.13	3.35	2	2.49333	10.56	333	306	218	59	96	61	72	285.667	9.46	8.99	6.82	1.74	2.56	1.55	1.95	8.42333	1.78966	9.10031e-12	6.68058e-10
URS00009AD5D5	'URS00009AD5D5'	lncRNA	0.17	0.33	0.44	1.06	1.2	1.95	1.40333	0.313333	19.99	38.2	49.64	131.44	140.02	225.97	165.81	35.9433	0.14	0.26	0.34	0.87	0.91	1.51	1.09667	0.246667	-2.45233	8.91512e-12	6.58089e-10
URS00009B2238	'URS00009B2238'	lncRNA	3.7	4.74	6.22	0.27	0.96	0.97	0.733333	4.88667	159	194	248	12	40	40	30.6667	200.333	3.04	3.74	4.84	0.22	0.73	0.75	0.566667	3.87333	2.50284	6.74731e-12	5.10802e-10
URS00009B84AD	'URS00009B84AD'	lncRNA	0.64	1.44	1.92	4.52	4.55	5.18	4.75	1.33333	42	90	117	303	289	325	305.667	83	0.53	1.13	1.49	3.69	3.48	4	3.72333	1.05	-2.10925	2.75955e-12	2.27604e-10
URS00009B84C8	'URS00009B84C8'	lncRNA	5.38	4.26	4.53	1.05	1.23	1	1.09333	4.72333	182.32	137.42	142.56	36.45	40.48	32.81	36.58	154.1	4.42	3.36	3.53	0.85	0.94	0.78	0.856667	3.77	1.88553	2.53486e-12	2.13088e-10
URS00009B10C5	'URS00009B10C5'	lncRNA	1.77	1.37	1.65	0.36	0.31	0.35	0.34	1.59667	160.82	119.07	139.45	33.66	27.67	30.36	30.5633	139.78	1.46	1.08	1.28	0.3	0.24	0.27	0.27	1.27333	2.00121	1.80921e-12	1.54525e-10
URS00009B4753	'URS00009B4753'	lncRNA	1.25	1.22	3.66	21.83	12.72	19.29	17.9467	2.04333	5.27	4.62	13.43	101.24	54.1	85.09	80.1433	7.77333	1.02	0.96	2.84	17.81	9.73	14.92	14.1533	1.60667	-3.68339	5.30262e-13	4.90639e-11
URS0000A928E4	'URS0000A928E4'	lncRNA	11.24	8.5	6.87	67.45	48.97	31.87	49.43	8.87	27.53	17.9	14.03	187.95	123.21	85.22	132.127	19.82	9.23	6.71	5.34	55.05	37.46	24.64	39.05	7.09333	-2.98606	4.00374e-13	3.77002e-11
69548	'2310015A10Rik'	lncRNA	5.17	4.02	4.17	11.2	9.09	10.07	10.12	4.45333	151	171	159	716	399	460	525	160.333	4.25	3.17	3.25	9.14	6.96	7.78	7.96	3.55667	-1.94236	4.89301e-14	5.322e-12
320692	'9430037G07Rik'	lncRNA	1.62	1.49	1.66	5.6	3.31	4.73	4.54667	1.59	145.33	143.23	136.23	564.05	325.07	441.52	443.547	141.597	1.33	1.17	1.29	4.57	2.53	3.66	3.58667	1.26333	-1.87765	4.02551e-14	4.43272e-12
URS00009B36E7	'URS00009B36E7'	lncRNA	0.61	0.68	0.45	1.86	3.4	2.32	2.52667	0.58	37.99	40.14	26	117.86	204.73	138	153.53	34.71	0.5	0.53	0.35	1.51	2.6	1.79	1.96667	0.46	-2.35508	2.67938e-15	3.4327e-13
URS00009C22F0	'URS00009C22F0'	lncRNA	18.27	16.69	18.36	3.91	3.75	5.76	4.47333	17.7733	439.82	380.86	408.09	97.27	87.98	134.34	106.53	409.59	15.01	13.16	14.28	3.19	2.87	4.45	3.50333	14.15	1.73134	7.65245e-16	1.05115e-13
102634962	'Gm27252'	lncRNA	3.44	4.12	4.33	18.75	10.19	16.74	15.2267	3.96333	151	161	132	783	392	602	592.333	148	2.83	3.25	3.36	15.3	7.8	12.94	12.0133	3.14667	-2.23242	7.33186e-16	1.01233e-13
URS00009B46F8	'URS00009B46F8'	lncRNA	1.22	1.34	1.29	4.48	3.75	5.85	4.69333	1.28333	54.66	56.9	53.52	205.53	162.72	251.58	206.61	55.0267	1	1.05	1	3.66	2.87	4.53	3.68667	1.01667	-2.14456	1.07983e-16	1.68277e-14
URS00009C2848	'URS00009C2848'	lncRNA	9.49	8.49	7.44	38.48	23.44	28.22	30.0467	8.47333	484.31	413.42	353.09	2010.88	1159.81	1382.61	1517.77	416.94	7.8	6.7	5.79	31.4	17.93	21.82	23.7167	6.76333	-2.08947	3.11413e-17	5.35389e-15
71624	'4833411C07Rik'	lncRNA	11.34	11.89	10.84	24.21	21.02	27.52	24.25	11.3567	823.33	906.86	754.06	1897.67	1576.98	1973.98	1816.21	828.083	9.32	9.37	8.43	19.76	16.07	21.27	19.0333	9.04	-1.35331	2.92699e-17	5.06484e-15
URS00009BA3F6	'URS00009BA3F6'	lncRNA	12.38	12.88	21.28	96.54	51.44	147.52	98.5	15.5133	108.14	104.52	167.57	892.39	443.42	1286.65	874.153	126.743	10.17	10.15	16.55	78.79	39.34	114.05	77.3933	12.29	-3.0274	1.20353e-17	2.21185e-15
102640678	'Gm36691'	lncRNA	3.79	2.97	1.91	24.52	11.23	17	17.5833	2.89	226	246	118	1961	887	1198	1348.67	196.667	3.11	2.34	1.48	20.01	8.59	13.14	13.9133	2.31	-3.0077	1.33805e-18	2.76407e-16
URS00009D7284	'URS00009D7284'	lncRNA	0	0	0	12.04	37.57	19.1	22.9033	0	0	0	0	473.7	1397.76	704.73	858.73	0	0	0	0	9.83	28.73	14.77	17.7767	0	-12.373	9.9618e-21	2.60257e-18
100042498	'Mir22hg'	lncRNA	10.25	11.58	10.96	19.1	22.46	25.88	22.48	10.93	490	528	487	936	1042	1189	1055.67	501.667	8.42	9.13	8.52	15.59	17.18	20.01	17.5933	8.69	-1.28737	3.36618e-21	9.15326e-19
102633758	'Gm31508'	lncRNA	8.3	12.94	12.68	26.52	30.75	38.33	31.8667	11.3067	516.85	772.18	836.98	1909.69	2219.46	2786.83	2305.33	708.67	6.82	10.2	9.86	21.64	23.52	29.63	24.93	8.96	-1.92309	8.64575e-22	2.53178e-19
URS0000763E67	'URS0000763E67'	lncRNA	1.22	1.91	1.86	27.94	21.99	65.99	38.64	1.66333	6	8.5	8	149	108	334	197	7.5	1.01	1.51	1.45	22.8	16.82	51.02	30.2133	1.32333	-4.97596	4.41108e-22	1.36682e-19
100043489	'1300002E11Rik'	lncRNA	8.5	9.76	9.81	19.44	22.22	28.99	23.55	9.35667	375	454	455	1008	1001	1261	1090	428	6.98	7.7	7.63	15.86	17	22.41	18.4233	7.43667	-1.56811	1.09137e-23	4.09619e-21
102632880	'Gm30842'	lncRNA	8.49	11.69	10.97	23.71	24.15	22.99	23.6167	10.3833	345	467	460	1101	1056	991	1049.33	424	6.97	9.21	8.53	19.35	18.47	17.77	18.53	8.23667	-1.52746	1.29478e-24	5.47671e-22
102635290	'Ttc39aos1'	lncRNA	4.83	6.25	9.44	0.49	0.34	0.38	0.403333	6.84	188	189	292	16	17	16	16.3333	223	3.97	4.93	7.34	0.4	0.26	0.29	0.316667	5.41333	3.55311	8.99021e-29	5.8432e-26
402734	'C730036E19Rik'	lncRNA	94.12	119.67	120.53	26.69	32.43	21.5	26.8733	111.44	8049	9703	9885	2202	2729	1837	2256	9212.33	77.31	94.35	93.72	21.78	24.8	16.62	21.0667	88.46	1.81862	2.82259e-35	3.27028e-32
