# Supplementary material for: LncRNA Snhg3 Aggravates Hepatic Steatosis via PPARγ Signaling
Source: bioRxiv preprint, doi:10.1101/2024.03.22.586335, version 4 (2024-09-09)
Supplement: table supp. 4 [file 586335_file17.xls]

## Sheet: WT
	chr.x	start	end	length	signal value	M(Log2FC)	p	q	peak	chrom	chr.y	peak.start	peak.end	gene.id	symbol
3137	chr14	70327200	70327400	200	98.5242	2.00374	0.000729919	1	chip1_peak_4787	chr14_70327200_70327400	chr14	70327200	70327400	213053	Slc39a14
4060	chr16	45992600	45992800	200	98.5534	2.00433	0.000929284	1	chip1_peak_6287	chr16_45992600_45992800	chr16	45992600	45992800	433022	Plcxd2
4158	chr10	127872800	127873000	200	98.5767	2.00481	0.000949691	1	chip1_peak_6449	chr10_127872800_127873000	chr10	127872800	127873000	216454	BC089597
2879	chr7	44815400	44815600	200	98.5809	2.00489	0.000669254	1	chip1_peak_4359	chr7_44815400_44815600	chr7	44815400	44815600	107503	Atf5
3203	chr3	121493900	121494100	200	98.5974	2.00522	0.000741757	1	chip1_peak_4884	chr3_121493900_121494100	chr3	121493900	121494100	213603	Slc44a3
1593	chr12	103629100	103629400	300	98.5986	2.00525	0.000366985	1	chip1_peak_2319	chr12_103629100_103629400	chr12	103629100	103629400	217847	Serpina10
848	chr11	78420100	78420400	300	98.7957	2.00926	0.000192846	1	chip1_peak_1208	chr11_78420100_78420400	chr11	78420100	78420400	20500	Slc13a2
554	chr16	24459600	24459800	200	98.839	2.01014	0.000121432	1	chip1_peak_796	chr16_24459600_24459800	chr16	24459600	24459800	210126	Lpp
3683	chr10	68219400	68219600	200	98.8757	2.01089	0.000850958	1	chip1_peak_5677	chr10_68219400_68219600	chr10	68219400	68219600	71371	Arid5b
273	chr14	51103600	51104000	400	99.0231	2.01388	5.09e-05	1	chip1_peak_386	chr14_51103600_51104000	chr14	51103600	51104000	58809	Rnase4
1833	chr6	136914000	136914300	300	99.0697	2.01483	0.000425105	1	chip1_peak_2709	chr6_136914000_136914300	chr6	136914000	136914300	69187	Erp27
1202	chr4	104835700	104835900	200	99.1625	2.01672	0.000274369	1	chip1_peak_1744	chr4_104835700_104835900	chr4	104835700	104835900	230558	C8a
3072	chr15	31258000	31258200	200	99.2649	2.0188	0.000713354	1	chip1_peak_4681	chr15_31258000_31258200	chr15	31258000	31258200	223453	Dap
1905	chr5	114138600	114138800	200	99.3047	2.01961	0.000447516	1	chip1_peak_2834	chr5_114138600_114138800	chr5	114138600	114138800	22256	Ung
3114	chr11	71017900	71018100	200	99.3164	2.01985	0.000723975	1	chip1_peak_4749	chr11_71017900_71018100	chr11	71017900	71018100	116891	Derl2
2707	chr10	85387500	85387700	200	99.4027	2.0216	0.000628912	1	chip1_peak_4102	chr10_85387500_85387700	chr10	85387500	85387700	74007	Btbd11
2957	chr6	29541700	29541900	200	99.4403	2.02237	0.000684917	1	chip1_peak_4482	chr6_29541700_29541900	chr6	29541700	29541900	320938	Tnpo3
3292	chr15	78429400	78429600	200	99.4499	2.02256	0.000759421	1	chip1_peak_5020	chr15_78429400_78429600	chr15	78429400	78429600	72844	Kctd17
3756	chr2	109927900	109928100	200	99.4531	2.02263	0.000866234	1	chip1_peak_5786	chr2_109927900_109928100	chr2	109927900	109928100	107515	Lgr4
122	chr7	105595200	105595800	600	99.4726	2.02303	1.79e-05	0.822751	chip1_peak_181	chr7_105595200_105595800	chr7	105595200	105595800	15458	Hpx
462	chr7	126689500	126689700	200	99.4845	2.02327	9.66e-05	1	chip1_peak_662	chr7_126689500_126689700	chr7	126689500	126689700	75764	Slx1b
1484	chr1	158931000	158931200	200	99.502	2.02362	0.000343205	1	chip1_peak_2165	chr1_158931000_158931200	chr1	158931000	158931200	23850	Pappa2
2057	chr2	126929100	126929300	200	99.511	2.02381	0.000479578	1	chip1_peak_3060	chr2_126929100_126929300	chr2	126929100	126929300	66552	Sppl2a
3990	chr5	110840400	110840600	200	99.5361	2.02432	0.000916269	1	chip1_peak_6174	chr5_110840400_110840600	chr5	110840400	110840600	50883	Chek2
198	chr12	103616900	103617400	500	99.5429	2.02446	3.36e-05	1	chip1_peak_281	chr12_103616900_103617400	chr12	103616900	103617400	217847	Serpina10
3097	chr17	57219100	57219300	200	99.5449	2.0245	0.000719953	1	chip1_peak_4720	chr17_57219100_57219300	chr17	57219100	57219300	18347	Olfr48
187	chr7	105594400	105594900	500	99.5479	2.02456	3.07e-05	1	chip1_peak_268	chr7_105594400_105594900	chr7	105594400	105594900	15458	Hpx
3123	chr17	57222500	57222700	200	99.5616	2.02483	0.00072695	1	chip1_peak_4768	chr17_57222500_57222700	chr17	57222500	57222700	18347	Olfr48
241	chr11	120820900	120821100	200	99.5982	2.02558	4.44e-05	1	chip1_peak_340	chr11_120820900_120821100	chr11	120820900	120821100	14104	Fasn
47	chr15	59069500	59069800	300	99.6248	2.02612	2.61e-06	0.316011	chip1_peak_65	chr15_59069500_59069800	chr15	59069500	59069800	211401	Mtss1
3879	chr2	122246700	122246900	200	99.65	2.02663	0.000891369	1	chip1_peak_5978	chr2_122246700_122246900	chr2	122246700	122246900	20322	Sord
3940	chr2	71498500	71498700	200	99.7799	2.02928	0.000903178	1	chip1_peak_6074	chr2_71498500_71498700	chr2	71498500	71498700	66559	Metap1d
1133	chr16	35402800	35403200	400	99.7816	2.02931	0.000257698	1	chip1_peak_1636	chr16_35402800_35403200	chr16	35402800	35403200	72599	Pdia5
303	chr14	70303900	70304200	300	99.7944	2.02957	5.79e-05	1	chip1_peak_430	chr14_70303900_70304200	chr14	70303900	70304200	213053	Slc39a14
99	chr5	28076200	28076600	400	99.8447	2.03059	1.37e-05	0.748796	chip1_peak_151	chr5_28076200_28076600	chr5	28076200	28076600	231070	Insig1
2803	chr11	104392200	104392400	200	99.9334	2.0324	0.000651193	1	chip1_peak_4246	chr11_104392200_104392400	chr11	104392200	104392400	76719	Kansl1
463	chr4	101198700	101199000	300	99.9845	2.03344	9.67e-05	1	chip1_peak_663	chr4_101198700_101199000	chr4	101198700	101199000	16451	Jak1
262	chr4	149997700	149997900	200	100.018	2.03412	4.83e-05	1	chip1_peak_372	chr4_149997700_149997900	chr4	149997700	149997900	100198	H6pd
2093	chr14	75243600	75243800	200	100.041	2.03458	0.000490434	1	chip1_peak_3121	chr14_75243600_75243800	chr14	75243600	75243800	100124475	Mir466f-3
2094	chr14	75243600	75243800	200	100.041	2.03458	0.000490434	1	chip1_peak_3121	chr14_75243600_75243800	chr14	75243600	75243800	56373	Cpb2
3113	chr13	62858000	62858200	200	100.061	2.03498	0.000723736	1	chip1_peak_4745	chr13_62858000_62858200	chr13	62858000	62858200	16549	Khsrp
216	chr8	111596000	111596200	200	100.064	2.03506	3.89e-05	1	chip1_peak_310	chr8_111596000_111596200	chr8	111596000	111596200	170737	Znrf1
1665	chr5	92585400	92585600	200	100.087	2.03552	0.000387086	1	chip1_peak_2437	chr5_92585400_92585600	chr5	92585400	92585600	384198	Fam47e
2702	chr4	53103700	53103900	200	100.088	2.03555	0.000627351	1	chip1_peak_4094	chr4_53103700_53103900	chr4	53103700	53103900	11303	Abca1
834	chr2	72235800	72236000	200	100.097	2.03572	0.0001895	1	chip1_peak_1188	chr2_72235800_72236000	chr2	72235800	72236000	56508	Rapgef4
1233	chr18	12826600	12826900	300	100.126	2.03631	0.000284298	1	chip1_peak_1790	chr18_12826600_12826900	chr18	12826600	12826900	64291	Osbpl1a
3933	chr14	31609600	31609800	200	100.272	2.03927	0.000902202	1	chip1_peak_6063	chr14_31609600_31609800	chr14	31609600	31609800	56794	Hacl1
3247	chr11	16766000	16766200	200	100.293	2.0397	0.000751102	1	chip1_peak_4954	chr11_16766000_16766200	chr11	16766000	16766200	13649	Egfr
236	chr6	90568700	90568900	200	100.297	2.03979	4.22e-05	1	chip1_peak_332	chr6_90568700_90568900	chr6	90568700	90568900	107747	Aldh1l1
2318	chr2	31825300	31825700	400	100.345	2.04078	0.000537576	1	chip1_peak_3458	chr2_31825300_31825700	chr2	31825300	31825700	98970	Fibcd1
649	chr7	99960800	99961300	500	100.349	2.04084	0.00014555	1	chip1_peak_937	chr7_99960800_99961300	chr7	99960800	99961300	108937	Rnf169
1563	chr11	16763100	16763300	200	100.362	2.04111	0.000360063	1	chip1_peak_2278	chr11_16763100_16763300	chr11	16763100	16763300	13649	Egfr
87	chr7	105599400	105599600	200	100.394	2.04176	9.86e-06	0.597238	chip1_peak_136	chr7_105599400_105599600	chr7	105599400	105599600	15458	Hpx
3872	chr6	99051500	99051700	200	100.405	2.04199	0.000890362	1	chip1_peak_5966	chr6_99051500_99051700	chr6	99051500	99051700	108655	Foxp1
1166	chr2	34526900	34527100	200	100.408	2.04205	0.000265669	1	chip1_peak_1686	chr2_34526900_34527100	chr2	34526900	34527100	227743	Mapkap1
3186	chr5	135728500	135728800	300	100.493	2.04377	0.000738668	1	chip1_peak_4862	chr5_135728500_135728800	chr5	135728500	135728800	18984	Por
587	chr12	103627500	103627800	300	100.531	2.04455	0.000129962	1	chip1_peak_846	chr12_103627500_103627800	chr12	103627500	103627800	217847	Serpina10
1461	chr6	83117900	83118200	300	100.552	2.04497	0.000336811	1	chip1_peak_2129	chr6_83117900_83118200	chr6	83117900	83118200	57377	Mogs
871	chr3	27604100	27604600	500	100.552	2.04499	0.000197111	1	chip1_peak_1246	chr3_27604100_27604600	chr3	27604100	27604600	72007	Fndc3b
4093	chr17	13822100	13822300	200	100.554	2.04503	0.000935024	1	chip1_peak_6344	chr17_13822100_13822300	chr17	13822100	13822300	17356	Mllt4
2021	chr16	35404000	35404200	200	100.569	2.04533	0.00047116	1	chip1_peak_3009	chr16_35404000_35404200	chr16	35404000	35404200	72599	Pdia5
4354	chr7	24532000	24532200	200	100.584	2.04563	0.000994034	1	chip1_peak_6782	chr7_24532000_24532200	chr7	24532000	24532200	210146	Irgq
737	chr2	4895100	4895300	200	100.601	2.04597	0.000169044	1	chip1_peak_1065	chr2_4895100_4895300	chr2	4895100	4895300	109079	Sephs1
632	chr13	24329500	24329700	200	100.67	2.04739	0.000139909	1	chip1_peak_907	chr13_24329500_24329700	chr13	24329500	24329700	12763	Cmah
957	chr2	72153600	72153800	200	100.702	2.04802	0.000215199	1	chip1_peak_1371	chr2_72153600_72153800	chr2	72153600	72153800	56508	Rapgef4
3438	chr12	103947500	103947700	200	100.721	2.04842	0.000789408	1	chip1_peak_5253	chr12_103947500_103947700	chr12	103947500	103947700	20704	Serpina1e
189	chr8	3247400	3247600	200	100.738	2.04876	3.15e-05	1	chip1_peak_271	chr8_3247400_3247600	chr8	3247400	3247600	16337	Insr
2941	chr8	64785300	64785500	200	100.855	2.05114	0.000679801	1	chip1_peak_4450	chr8_64785300_64785500	chr8	64785300	64785500	77113	Klhl2
3815	chr6	94666400	94666600	200	100.917	2.0524	0.00087982	1	chip1_peak_5879	chr6_94666400_94666600	chr6	94666400	94666600	16206	Lrig1
1984	chr1	133376900	133377100	200	101.04	2.05491	0.000463518	1	chip1_peak_2950	chr1_133376900_133377100	chr1	133376900	133377100	214253	Etnk2
1844	chr16	35414700	35414900	200	101.069	2.05548	0.000427391	1	chip1_peak_2725	chr16_35414700_35414900	chr16	35414700	35414900	72599	Pdia5
453	chr6	128524300	128524500	200	101.143	2.05701	9.32e-05	1	chip1_peak_649	chr6_128524300_128524500	chr6	128524300	128524500	11287	Pzp
1408	chr14	25735200	25735400	200	101.171	2.05758	0.00032539	1	chip1_peak_2050	chr14_25735200_25735400	chr14	25735200	25735400	71918	Zcchc24
976	chr8	41130800	41131100	300	101.249	2.05916	0.000218966	1	chip1_peak_1395	chr8_41130800_41131100	chr8	41130800	41131100	102103	Mtus1
3416	chr11	115161500	115161700	200	101.253	2.05923	0.000784812	1	chip1_peak_5215	chr11_115161500_115161700	chr11	115161500	115161700	58222	Rab37
3027	chr1	165661900	165662100	200	101.27	2.05958	0.000703544	1	chip1_peak_4596	chr1_165661900_165662100	chr1	165661900	165662100	226594	Rcsd1
2430	chr4	106566400	106566700	300	101.297	2.06012	0.000568508	1	chip1_peak_3662	chr4_106566400_106566700	chr4	106566400	106566700	74754	Dhcr24
2968	chr10	87528800	87529000	200	101.388	2.06198	0.000688036	1	chip1_peak_4504	chr10_87528800_87529000	chr10	87528800	87529000	18478	Pah
148	chr11	86843800	86844100	300	101.397	2.06216	2.24e-05	0.899228	chip1_peak_215	chr11_86843800_86844100	chr11	86843800	86844100	102465902	Mir8115
1191	chr19	34861500	34861800	300	101.401	2.06225	0.000270875	1	chip1_peak_1725	chr19_34861500_34861800	chr19	34861500	34861800	75735	Pank1
1330	chr19	10190000	10190200	200	101.442	2.06308	0.000309587	1	chip1_peak_1932	chr19_10190000_10190200	chr19	10190000	10190200	76267	Fads1
255	chr11	75437800	75438100	300	101.453	2.06331	4.7e-05	1	chip1_peak_360	chr11_75437800_75438100	chr11	75437800	75438100	18816	Serpinf2
653	chr2	72203200	72203500	300	101.509	2.06444	0.000146583	1	chip1_peak_943	chr2_72203200_72203500	chr2	72203200	72203500	56508	Rapgef4
3507	chr5	66059700	66059900	200	101.57	2.06569	0.000804692	1	chip1_peak_5366	chr5_66059700_66059900	chr5	66059700	66059900	245945	Rbm47
3188	chr7	143599100	143599300	200	101.579	2.06586	0.000738735	1	chip1_peak_4864	chr7_143599100_143599300	chr7	143599100	143599300	27267	Cars
1028	chr11	16754300	16754600	300	101.62	2.0667	0.000230498	1	chip1_peak_1477	chr11_16754300_16754600	chr11	16754300	16754600	13649	Egfr
278	chr12	103947900	103948400	500	101.659	2.06748	5.25e-05	1	chip1_peak_396	chr12_103947900_103948400	chr12	103947900	103948400	20704	Serpina1e
2179	chr9	35187500	35187700	200	101.703	2.06838	0.000508783	1	chip1_peak_3251	chr9_35187500_35187700	chr9	35187500	35187700	117149	Tirap
486	chr12	30936700	30936900	200	101.71	2.06852	9.97e-05	1	chip1_peak_688	chr12_30936700_30936900	chr12	30936700	30936900	24057	Sh3yl1
2073	chrX	161963600	161963800	200	101.732	2.06897	0.000484341	1	chip1_peak_3087	chrX_161963600_161963800	chrX	161963600	161963800	195727	Nhs
135	chr13	47170600	47170900	300	101.821	2.07079	2.06e-05	0.891438	chip1_peak_197	chr13_47170600_47170900	chr13	47170600	47170900	218215	Rnf144b
362	chr15	59052500	59052800	300	101.835	2.07107	7.4e-05	1	chip1_peak_521	chr15_59052500_59052800	chr15	59052500	59052800	211401	Mtss1
3263	chr4	134137500	134137700	200	101.875	2.07189	0.000754727	1	chip1_peak_4978	chr4_134137500_134137700	chr4	134137500	134137700	70012	Cep85
11	chr10	79880000	79881200	1200	101.891	2.07221	7.27e-08	0.0283094	chip1_peak_14	chr10_79880000_79881200	chr10	79880000	79881200	100568459	Bc1
12	chr10	79880000	79881200	1200	101.891	2.07221	7.27e-08	0.0283094	chip1_peak_14	chr10_79880000_79881200	chr10	79880000	79881200	19152	Prtn3
2448	chr4	101186100	101186300	200	101.95	2.07341	0.00057421	1	chip1_peak_3695	chr4_101186100_101186300	chr4	101186100	101186300	16451	Jak1
460	chr2	103589600	103589800	200	101.984	2.07411	9.65e-05	1	chip1_peak_660	chr2_103589600_103589800	chr2	103589600	103589800	99382	Abtb2
1436	chr11	63911400	63911600	200	102	2.07443	0.000331652	1	chip1_peak_2094	chr11_63911400_63911600	chr11	63911400	63911600	54710	Hs3st3b1
691	chr5	92327500	92327900	400	102.045	2.07535	0.000157406	1	chip1_peak_994	chr5_92327500_92327900	chr5	92327500	92327900	17329	Cxcl9
2158	chr19	5647200	5647400	200	102.167	2.07783	0.000504615	1	chip1_peak_3220	chr19_5647200_5647400	chr19	5647200	5647400	19697	Rela
1694	chr7	141459600	141459800	200	102.171	2.0779	0.000393809	1	chip1_peak_2480	chr7_141459600_141459800	chr7	141459600	141459800	66853	Pnpla2
444	chr14	30890600	30891200	600	102.257	2.07966	9.05e-05	1	chip1_peak_635	chr14_30890600_30891200	chr14	30890600	30891200	16427	Itih4
469	chr6	31155300	31155500	200	102.311	2.08074	9.72e-05	1	chip1_peak_669	chr6_31155300_31155500	chr6	31155300	31155500	232685	Lincpint
1792	chr8	46844200	46844400	200	102.395	2.08245	0.000413765	1	chip1_peak_2630	chr8_46844200_46844400	chr8	46844200	46844400	16363	Irf2
2266	chr15	74958600	74958800	200	102.399	2.08254	0.000527446	1	chip1_peak_3380	chr15_74958600_74958800	chr15	74958600	74958800	17069	Ly6e
478	chr11	16790800	16791000	200	102.48	2.0842	9.83e-05	1	chip1_peak_678	chr11_16790800_16791000	chr11	16790800	16791000	13649	Egfr
1115	chr17	57237800	57238000	200	102.504	2.08467	0.000252835	1	chip1_peak_1610	chr17_57237800_57238000	chr17	57237800	57238000	78308	Gpr108
304	chr11	16759200	16759500	300	102.511	2.08483	5.82e-05	1	chip1_peak_431	chr11_16759200_16759500	chr11	16759200	16759500	13649	Egfr
3327	chr1	36077800	36078000	200	102.571	2.08605	0.000765896	1	chip1_peak_5072	chr1_36077800_36078000	chr1	36077800	36078000	50785	Hs6st1
1598	chr6	129183000	129183200	200	102.629	2.08722	0.000368029	1	chip1_peak_2325	chr6_129183000_129183200	chr6	129183000	129183200	93694	Clec2d
1214	chr19	6063000	6063200	200	102.645	2.08754	0.00027689	1	chip1_peak_1762	chr19_6063000_6063200	chr19	6063000	6063200	73166	Tm7sf2
243	chr5	135718300	135718500	200	102.652	2.08768	4.56e-05	1	chip1_peak_344	chr5_135718300_135718500	chr5	135718300	135718500	18984	Por
2092	chr3	129582000	129582200	200	102.667	2.08799	0.000490353	1	chip1_peak_3120	chr3_129582000_129582200	chr3	129582000	129582200	170439	Elovl6
1051	chr2	31891200	31891500	300	102.717	2.08901	0.000236042	1	chip1_peak_1510	chr2_31891200_31891500	chr2	31891200	31891500	23928	Lamc3
4289	chr4	118229200	118229400	200	102.817	2.09105	0.000980051	1	chip1_peak_6668	chr4_118229200_118229400	chr4	118229200	118229400	19268	Ptprf
3039	chr9	103215800	103216000	200	102.838	2.09147	0.000705312	1	chip1_peak_4615	chr9_103215800_103216000	chr9	103215800	103216000	22044	Trh
69	chr17	46026300	46026700	400	102.955	2.09386	5.09e-06	0.44512	chip1_peak_95	chr17_46026300_46026700	chr17	46026300	46026700	22339	Vegfa
348	chr4	80939800	80940000	200	102.957	2.09389	6.99e-05	1	chip1_peak_504	chr4_80939800_80940000	chr4	80939800	80940000	52829	Lurap1l
3586	chr2	167335800	167336000	200	102.961	2.09397	0.000825926	1	chip1_peak_5503	chr2_167335800_167336000	chr2	167335800	167336000	56336	B4galt5
2204	chr3	83044600	83044800	200	103.018	2.09513	0.000514445	1	chip1_peak_3289	chr3_83044600_83044800	chr3	83044600	83044800	110135	Fgb
2772	chr2	27019400	27019600	200	103.065	2.09608	0.000644501	1	chip1_peak_4197	chr2_27019400_27019600	chr2	27019400	27019600	381356	Cacfd1
3287	chr5	138787100	138787300	200	103.083	2.09644	0.000758791	1	chip1_peak_5012	chr5_138787100_138787300	chr5	138787100	138787300	80752	Fam20c
3084	chr15	77274100	77274300	200	103.125	2.0973	0.000715776	1	chip1_peak_4696	chr15_77274100_77274300	chr15	77274100	77274300	93686	Rbfox2
3318	chr14	25497300	25497500	200	103.251	2.09987	0.000763508	1	chip1_peak_5056	chr14_25497300_25497500	chr14	25497300	25497500	328365	Zmiz1
3823	chr17	86552700	86552900	200	103.303	2.10092	0.000880405	1	chip1_peak_5890	chr17_86552700_86552900	chr17	86552700	86552900	18754	Prkce
1801	chr10	22302500	22302700	200	103.352	2.10192	0.00041612	1	chip1_peak_2648	chr10_22302500_22302700	chr10	22302500	22302700	19368	Raet1a
1802	chr10	22302500	22302700	200	103.352	2.10192	0.00041612	1	chip1_peak_2648	chr10_22302500_22302700	chr10	22302500	22302700	19369	Raet1b
1803	chr10	22302500	22302700	200	103.352	2.10192	0.00041612	1	chip1_peak_2648	chr10_22302500_22302700	chr10	22302500	22302700	19370	Raet1c
1796	chr13	38170600	38170900	300	103.515	2.10524	0.000414135	1	chip1_peak_2637	chr13_38170600_38170900	chr13	38170600	38170900	666279	Dspp
1966	chr8	41039300	41039500	200	103.597	2.1069	0.000458599	1	chip1_peak_2918	chr8_41039300_41039500	chr8	41039300	41039500	102103	Mtus1
663	chr12	103997100	103997400	300	103.809	2.11121	0.000149168	1	chip1_peak_957	chr12_103997100_103997400	chr12	103997100	103997400	71907	Serpina9
1402	chr4	106440200	106440400	200	103.837	2.11179	0.000324341	1	chip1_peak_2041	chr4_106440200_106440400	chr4	106440200	106440400	329908	Usp24
334	chr11	120820200	120820500	300	103.874	2.11254	6.66e-05	1	chip1_peak_483	chr11_120820200_120820500	chr11	120820200	120820500	14104	Fasn
461	chr15	76597800	76598000	200	103.898	2.11303	9.66e-05	1	chip1_peak_661	chr15_76597800_76598000	chr15	76597800	76598000	94230	Cpsf1
1395	chr7	141482400	141482600	200	103.921	2.1135	0.000323073	1	chip1_peak_2032	chr7_141482400_141482600	chr7	141482400	141482600	64540	Tspan4
3521	chr8	117707700	117707900	200	103.973	2.11456	0.000808633	1	chip1_peak_5396	chr8_117707700_117707900	chr8	117707700	117707900	15486	Hsd17b2
1285	chr5	74647500	74647800	300	104.006	2.11522	0.000296739	1	chip1_peak_1863	chr5_74647500_74647800	chr5	74647500	74647800	16924	Lnx1
3804	chr17	34591200	34591400	200	104.04	2.11591	0.000877831	1	chip1_peak_5864	chr17_34591200_34591400	chr17	34591200	34591400	106512	Gpsm3
1816	chr3	89409000	89409200	200	104.105	2.11723	0.000420169	1	chip1_peak_2677	chr3_89409000_89409200	chr3	89409000	89409200	319945	Flad1
961	chr6	90591600	90591900	300	104.137	2.11789	0.000215865	1	chip1_peak_1375	chr6_90591600_90591900	chr6	90591600	90591900	107747	Aldh1l1
2688	chr2	34994600	34994900	300	104.175	2.11866	0.000624564	1	chip1_peak_4068	chr2_34994600_34994900	chr2	34994600	34994900	15139	Hc
1182	chr9	45939400	45939600	200	104.189	2.11894	0.000269209	1	chip1_peak_1713	chr9_45939400_45939600	chr9	45939400	45939600	102465659	Mir7087
1183	chr9	45939400	45939600	200	104.189	2.11894	0.000269209	1	chip1_peak_1713	chr9_45939400_45939600	chr9	45939400	45939600	214597	Sidt2
297	chr14	27336900	27337100	200	104.197	2.1191	5.61e-05	1	chip1_peak_422	chr14_27336900_27337100	chr14	27336900	27337100	71704	Arhgef3
3217	chr15	7142100	7142300	200	104.22	2.11958	0.000745474	1	chip1_peak_4905	chr15_7142100_7142300	chr15	7142100	7142300	16880	Lifr
500	chr14	70312100	70312300	200	104.262	2.12044	0.000103375	1	chip1_peak_707	chr14_70312100_70312300	chr14	70312100	70312300	213053	Slc39a14
79	chr5	139390100	139390300	200	104.36	2.12243	7.28e-06	0.515954	chip1_peak_117	chr5_139390100_139390300	chr5	139390100	139390300	73212	3110082I17Rik
80	chr5	139390100	139390300	200	104.36	2.12243	7.28e-06	0.515954	chip1_peak_117	chr5_139390100_139390300	chr5	139390100	139390300	80290	Gpr146
3622	chr4	141859900	141860100	200	104.373	2.12268	0.000834186	1	chip1_peak_5565	chr4_141859900_141860100	chr4	141859900	141860100	27984	Efhd2
1997	chr15	3487400	3487600	200	104.386	2.12295	0.000466698	1	chip1_peak_2970	chr15_3487400_3487600	chr15	3487400	3487600	58991	Ghrl
2169	chr19	5798100	5798300	200	104.424	2.12373	0.000506775	1	chip1_peak_3237	chr19_5798100_5798300	chr19	5798100	5798300	72289	Malat1
2202	chr14	40886900	40887100	200	104.44	2.12406	0.000514236	1	chip1_peak_3287	chr14_40886900_40887100	chr14	40886900	40887100	328381	Sh2d4b
647	chr15	59061900	59062100	200	104.454	2.12433	0.000145032	1	chip1_peak_933	chr15_59061900_59062100	chr15	59061900	59062100	211401	Mtss1
1358	chr14	70326200	70326400	200	104.603	2.12737	0.000314934	1	chip1_peak_1977	chr14_70326200_70326400	chr14	70326200	70326400	213053	Slc39a14
2746	chr11	100546900	100547100	200	104.658	2.12849	0.000637817	1	chip1_peak_4159	chr11_100546900_100547100	chr11	100546900	100547100	74407	Ttc25
3917	chr14	70510100	70510300	200	104.702	2.12937	0.000899791	1	chip1_peak_6039	chr14_70510100_70510300	chr14	70510100	70510300	12153	Bmp1
108	chr4	41639200	41639700	500	104.803	2.13143	1.45e-05	0.752843	chip1_peak_162	chr4_41639200_41639700	chr4	41639200	41639700	69638	Enho
1178	chr10	127598300	127598500	200	104.885	2.1331	0.000268328	1	chip1_peak_1709	chr10_127598300_127598500	chr10	127598300	127598500	16971	Lrp1
144	chr16	31015300	31015600	300	104.933	2.13407	2.18e-05	0.899228	chip1_peak_208	chr16_31015300_31015600	chr16	31015300	31015600	100316676	Mir1195
145	chr16	31015300	31015600	300	104.933	2.13407	2.18e-05	0.899228	chip1_peak_208	chr16_31015300_31015600	chr16	31015300	31015600	268880	Xxylt1
3935	chr8	105138000	105138200	200	104.939	2.13419	0.000902586	1	chip1_peak_6066	chr8_105138000_105138200	chr8	105138000	105138200	234677	Ces4a
3784	chr17	63488000	63488200	200	105.025	2.13595	0.000872964	1	chip1_peak_5832	chr17_63488000_63488200	chr17	63488000	63488200	50758	Fbxl17
3669	chr7	119560500	119560700	200	105.028	2.136	0.000844921	1	chip1_peak_5641	chr7_119560500_119560700	chr7	119560500	119560700	233799	Acsm2
104	chr15	30286000	30286200	200	105.08	2.13706	1.41e-05	0.750892	chip1_peak_156	chr15_30286000_30286200	chr15	30286000	30286200	18163	Ctnnd2
4169	chr5	34416100	34416300	200	105.122	2.13791	0.00095121	1	chip1_peak_6462	chr5_34416100_34416300	chr5	34416100	34416300	231128	Fam193a
2966	chr2	144073400	144073600	200	105.187	2.13924	0.000687822	1	chip1_peak_4500	chr2_144073400_144073600	chr2	144073400	144073600	403171	Banf2
1756	chr18	65036800	65037000	200	105.189	2.13929	0.000406911	1	chip1_peak_2579	chr18_65036800_65037000	chr18	65036800	65037000	83814	Nedd4l
1983	chr14	30912000	30912200	200	105.232	2.14015	0.000463324	1	chip1_peak_2948	chr14_30912000_30912200	chr14	30912000	30912200	16426	Itih3
2884	chr10	79883300	79883500	200	105.235	2.14021	0.000669837	1	chip1_peak_4364	chr10_79883300_79883500	chr10	79883300	79883500	100568459	Bc1
3381	chr10	59992400	59992600	200	105.249	2.14049	0.000779332	1	chip1_peak_5162	chr10_59992400_59992600	chr10	59992400	59992600	52717	Anapc16
302	chr2	91628300	91628500	200	105.275	2.14103	5.77e-05	1	chip1_peak_429	chr2_91628300_91628500	chr2	91628300	91628500	27367	Rpl3
4175	chr7	101362000	101362200	200	105.324	2.14202	0.000952278	1	chip1_peak_6472	chr7_101362000_101362200	chr7	101362000	101362200	69710	Arap1
2599	chr6	126162300	126162500	200	105.363	2.14282	0.000604376	1	chip1_peak_3927	chr6_126162300_126162500	chr6	126162300	126162500	68051	Nutf2
956	chr19	40943600	40943900	300	105.366	2.14288	0.000214895	1	chip1_peak_1370	chr19_40943600_40943900	chr19	40943600	40943900	17060	Blnk
295	chr4	45510500	45510700	200	105.445	2.14448	5.61e-05	1	chip1_peak_420	chr4_45510500_45510700	chr4	45510500	45510700	230126	Shb
3022	chr19	42036000	42036200	200	105.486	2.14532	0.000702988	1	chip1_peak_4590	chr19_42036000_42036200	chr19	42036000	42036200	56642	Ankrd2
265	chr17	57218100	57218600	500	105.56	2.14682	4.87e-05	1	chip1_peak_375	chr17_57218100_57218600	chr17	57218100	57218600	18347	Olfr48
2676	chr4	139199200	139199400	200	105.61	2.14784	0.000622852	1	chip1_peak_4054	chr4_139199200_139199400	chr4	139199200	139199400	12345	Capzb
3598	chr8	84739000	84739200	200	105.771	2.15112	0.000827928	1	chip1_peak_5524	chr8_84739000_84739200	chr8	84739000	84739200	18032	Nfix
2406	chr15	82236900	82237100	200	105.791	2.15152	0.000559797	1	chip1_peak_3610	chr15_82236900_82237100	chr15	82236900	82237100	66570	Cenpm
386	chr7	102016400	102016900	500	105.802	2.15175	7.99e-05	1	chip1_peak_553	chr7_102016400_102016900	chr7	102016400	102016900	16068	Il18bp
1036	chr14	21122500	21122700	200	105.813	2.15197	0.000232589	1	chip1_peak_1489	chr14_21122500_21122700	chr14	21122500	21122700	11534	Adk
716	chr14	51102400	51102600	200	105.897	2.15368	0.000163829	1	chip1_peak_1035	chr14_51102400_51102600	chr14	51102400	51102600	58809	Rnase4
2422	chr12	103626200	103626400	200	105.958	2.15493	0.000564623	1	chip1_peak_3641	chr12_103626200_103626400	chr12	103626200	103626400	217847	Serpina10
579	chr10	42862000	42862200	200	106.07	2.15721	0.000127561	1	chip1_peak_834	chr10_42862000_42862200	chr10	42862000	42862200	268297	Scml4
508	chr11	35973700	35973900	200	106.204	2.15993	0.000104631	1	chip1_peak_718	chr11_35973700_35973900	chr11	35973700	35973900	211652	Wwc1
2394	chr14	30891300	30891600	300	106.208	2.16	0.00055598	1	chip1_peak_3586	chr14_30891300_30891600	chr14	30891300	30891600	16427	Itih4
851	chr14	30017200	30017400	200	106.316	2.1622	0.000193943	1	chip1_peak_1215	chr14_30017200_30017400	chr14	30017200	30017400	218865	Chdh
891	chr14	47104600	47104800	200	106.335	2.16259	0.0002007	1	chip1_peak_1271	chr14_47104600_47104800	chr14	47104600	47104800	74480	Samd4
3682	chr4	129214800	129215000	200	106.349	2.16288	0.000850778	1	chip1_peak_5675	chr4_129214800_129215000	chr4	129214800	129215000	107271	Yars
485	chr11	5525300	5525500	200	106.383	2.16356	9.96e-05	1	chip1_peak_687	chr11_5525300_5525500	chr11	5525300	5525500	22433	Xbp1
2724	chr10	42220000	42220200	200	106.406	2.16403	0.000631754	1	chip1_peak_4126	chr10_42220000_42220200	chr10	42220000	42220200	56484	Foxo3
3998	chr8	128440500	128440700	200	106.564	2.16726	0.000917285	1	chip1_peak_6185	chr8_128440500_128440700	chr8	128440500	128440700	18186	Nrp1
4369	chr12	85639200	85639400	200	106.568	2.16732	0.000996778	1	chip1_peak_6804	chr12_85639200_85639400	chr12	85639200	85639400	81703	Jdp2
37	chr10	68533300	68533600	300	106.768	2.17139	1.35e-06	0.208902	chip1_peak_46	chr10_68533300_68533600	chr10	68533300	68533600	73287	1700040L02Rik
2727	chr4	137883500	137883700	200	106.814	2.17233	0.000632504	1	chip1_peak_4129	chr4_137883500_137883700	chr4	137883500	137883700	230857	Ece1
510	chr12	85823400	85823700	300	106.86	2.17327	0.000104752	1	chip1_peak_720	chr12_85823400_85823700	chr12	85823400	85823700	58520	0610007P14Rik
3104	chr11	120480100	120480300	200	106.869	2.17344	0.000721282	1	chip1_peak_4730	chr11_120480100_120480300	chr11	120480100	120480300	15239	Hgs
614	chr9	69306300	69306500	200	106.874	2.17356	0.000135947	1	chip1_peak_883	chr9_69306300_69306500	chr9	69306300	69306500	19883	Rora
3479	chr8	68336700	68336900	200	106.877	2.1736	0.000799018	1	chip1_peak_5325	chr8_68336700_68336900	chr8	68336700	68336900	72281	Sh2d4a
89	chr8	84068400	84068800	400	106.882	2.17371	1e-05	0.599774	chip1_peak_139	chr8_84068400_84068800	chr8	84068400	84068800	19724	Rfx1
2988	chr19	41337000	41337200	200	106.983	2.17576	0.000695719	1	chip1_peak_4539	chr19_41337000_41337200	chr19	41337000	41337200	83490	Pik3ap1
1144	chr5	125304000	125304200	200	107.001	2.17614	0.000260134	1	chip1_peak_1651	chr5_125304000_125304200	chr5	125304000	125304200	20778	Scarb1
14	chr7	105598600	105599000	400	107.011	2.17633	1.24e-07	0.0423213	chip1_peak_17	chr7_105598600_105599000	chr7	105598600	105599000	15458	Hpx
84	chr13	24359200	24359700	500	107.058	2.1773	8.46e-06	0.559867	chip1_peak_125	chr13_24359200_24359700	chr13	24359200	24359700	12763	Cmah
3573	chr9	63649800	63650000	200	107.113	2.17841	0.000823464	1	chip1_peak_5483	chr9_63649800_63650000	chr9	63649800	63650000	17127	Smad3
4005	chr4	45852700	45852900	200	107.145	2.17906	0.000919613	1	chip1_peak_6203	chr4_45852700_45852900	chr4	45852700	45852900	74152	Stra6l
4085	chr2	6325700	6325900	200	107.161	2.17939	0.000934335	1	chip1_peak_6334	chr2_6325700_6325900	chr2	6325700	6325900	98910	Usp6nl
1219	chr2	27327400	27327600	200	107.168	2.17953	0.000279528	1	chip1_peak_1767	chr2_27327400_27327600	chr2	27327400	27327600	22325	Vav2
2463	chr9	109091800	109092000	200	107.192	2.18002	0.000577086	1	chip1_peak_3717	chr9_109091800_109092000	chr9	109091800	109092000	66658	Ccdc51
800	chr2	71254300	71254600	300	107.27	2.18161	0.000180803	1	chip1_peak_1143	chr2_71254300_71254600	chr2	71254300	71254600	13427	Dync1i2
2074	chr15	53145100	53145300	200	107.285	2.1819	0.000484793	1	chip1_peak_3090	chr15_53145100_53145300	chr15	53145100	53145300	14042	Ext1
1169	chr19	4544800	4545000	200	107.301	2.18224	0.000266366	1	chip1_peak_1694	chr19_4544800_4545000	chr19	4544800	4545000	18563	Pcx
3553	chr9	62364800	62365000	200	107.322	2.18266	0.000818148	1	chip1_peak_5452	chr9_62364800_62365000	chr9	62364800	62365000	11737	Anp32a
1869	chr15	31232500	31232700	200	107.329	2.18281	0.000438	1	chip1_peak_2778	chr15_31232500_31232700	chr15	31232500	31232700	223453	Dap
3006	chr10	68113500	68113700	200	107.412	2.1845	0.000700354	1	chip1_peak_4567	chr10_68113500_68113700	chr10	68113500	68113700	71371	Arid5b
1547	chr4	82503300	82503500	200	107.442	2.18511	0.000357076	1	chip1_peak_2260	chr4_82503300_82503500	chr4	82503300	82503500	18028	Nfib
36	chr5	140212600	140213300	700	107.445	2.18517	1.31e-06	0.20808	chip1_peak_44	chr5_140212600_140213300	chr5	140212600	140213300	17120	Mad1l1
3058	chr19	5097600	5097800	200	107.45	2.18527	0.000709982	1	chip1_peak_4650	chr19_5097600_5097800	chr19	5097600	5097800	12794	Cnih2
1300	chr8	70547100	70547300	200	107.453	2.18532	0.000302077	1	chip1_peak_1888	chr8_70547100_70547300	chr8	70547100	70547300	13716	Ell
549	chr10	127746700	127746900	200	107.466	2.1856	0.000118989	1	chip1_peak_787	chr10_127746700_127746900	chr10	127746700	127746900	320080	Zbtb39
3610	chr8	70337100	70337300	200	107.481	2.1859	0.000831941	1	chip1_peak_5546	chr8_70337100_70337300	chr8	70337100	70337300	19704	Upf1
2200	chr19	14502800	14503000	200	107.518	2.18664	0.000513408	1	chip1_peak_3283	chr19_14502800_14503000	chr19	14502800	14503000	21888	Tle4
325	chr6	31123700	31123900	200	107.651	2.18936	6.4e-05	1	chip1_peak_465	chr6_31123700_31123900	chr6	31123700	31123900	232685	Lincpint
3412	chr1	60563900	60564100	200	107.877	2.19395	0.000784555	1	chip1_peak_5210	chr1_60563900_60564100	chr1	60563900	60564100	77300	Raph1
3170	chr9	103216800	103217000	200	108.001	2.19648	0.000734435	1	chip1_peak_4834	chr9_103216800_103217000	chr9	103216800	103217000	22044	Trh
3003	chr11	107397900	107398100	200	108.006	2.19658	0.000699729	1	chip1_peak_4563	chr11_107397900_107398100	chr11	107397900	107398100	71795	Pitpnc1
582	chr11	120811700	120812000	300	108.053	2.19752	0.000128036	1	chip1_peak_837	chr11_120811700_120812000	chr11	120811700	120812000	14104	Fasn
1060	chr11	102405500	102405700	200	108.062	2.19772	0.000237726	1	chip1_peak_1521	chr11_102405500_102405700	chr11	102405500	102405700	68066	Slc25a39
3127	chr16	35402200	35402400	200	108.123	2.19895	0.000727492	1	chip1_peak_4773	chr16_35402200_35402400	chr16	35402200	35402400	72599	Pdia5
3722	chr11	119546300	119546600	300	108.16	2.1997	0.000858599	1	chip1_peak_5729	chr11_119546300_119546600	chr11	119546300	119546600	18164	Nptx1
2759	chr5	116415600	116415800	200	108.167	2.19985	0.000641217	1	chip1_peak_4176	chr5_116415600_116415800	chr5	116415600	116415800	80888	Hspb8
533	chr15	3545500	3545800	300	108.224	2.201	0.000110901	1	chip1_peak_754	chr15_3545500_3545800	chr15	3545500	3545800	58991	Ghrl
2615	chr11	117306600	117306800	200	108.257	2.20168	0.000607843	1	chip1_peak_3955	chr11_117306600_117306800	chr11	117306600	117306800	53860	2023-09-09
2982	chr15	77817400	77817600	200	108.294	2.20244	0.000693612	1	chip1_peak_4529	chr15_77817400_77817600	chr15	77817400	77817600	17886	Myh9
197	chr15	39783500	39783700	200	108.309	2.20274	3.35e-05	1	chip1_peak_280	chr15_39783500_39783700	chr15	39783500	39783700	64705	Dpys
2017	chr11	118234400	118234700	300	108.397	2.20453	0.000470221	1	chip1_peak_3002	chr11_118234400_118234700	chr11	118234400	118234700	19157	Cyth1
1819	chr2	60261200	60261400	200	108.405	2.20468	0.000420952	1	chip1_peak_2680	chr2_60261200_60261400	chr2	60261200	60261400	66205	Cd302
2781	chr14	47560700	47560900	200	108.435	2.20529	0.000645841	1	chip1_peak_4211	chr14_47560700_47560900	chr14	47560700	47560900	100504663	Atg14
4114	chr17	30139000	30139200	200	108.436	2.20532	0.000939366	1	chip1_peak_6372	chr17_30139000_30139200	chr17	30139000	30139200	21769	Zfand3
1866	chr10	68111200	68111400	200	108.529	2.20721	0.000435634	1	chip1_peak_2767	chr10_68111200_68111400	chr10	68111200	68111400	71371	Arid5b
1789	chr2	5674600	5674800	200	108.548	2.20759	0.000413041	1	chip1_peak_2621	chr2_5674600_5674800	chr2	5674600	5674800	227541	Camk1d
3899	chr16	35467700	35467900	200	108.603	2.20871	0.000895392	1	chip1_peak_6007	chr16_35467700_35467900	chr16	35467700	35467900	72599	Pdia5
1428	chr12	40221600	40221800	200	108.633	2.20933	0.000330568	1	chip1_peak_2085	chr12_40221600_40221800	chr12	40221600	40221800	15982	Ifrd1
835	chr15	3503200	3503400	200	108.639	2.20946	0.000189883	1	chip1_peak_1190	chr15_3503200_3503400	chr15	3503200	3503400	58991	Ghrl
2326	chr9	20804000	20804200	200	108.663	2.20993	0.000539722	1	chip1_peak_3469	chr9_20804000_20804200	chr9	20804000	20804200	53867	Col5a3
3246	chr3	88437200	88437400	200	108.701	2.2107	0.000751008	1	chip1_peak_4953	chr3_88437200_88437400	chr3	88437200	88437400	20351	Sema4a
242	chr4	151051200	151051500	300	108.707	2.21083	4.5e-05	1	chip1_peak_342	chr4_151051200_151051500	chr4	151051200	151051500	22319	Vamp3
1185	chr19	10185500	10185700	200	108.734	2.21138	0.000269689	1	chip1_peak_1716	chr19_10185500_10185700	chr19	10185500	10185700	76267	Fads1
507	chr14	66007000	66007200	200	108.746	2.21162	0.00010462	1	chip1_peak_717	chr14_66007000_66007200	chr14	66007000	66007200	268756	Gulo
3079	chr1	155793500	155793700	200	108.778	2.21228	0.000715251	1	chip1_peak_4689	chr1_155793500_155793700	chr1	155793500	155793700	104009	Qsox1
1780	chr14	70327900	70328100	200	108.868	2.21409	0.000412085	1	chip1_peak_2612	chr14_70327900_70328100	chr14	70327900	70328100	213053	Slc39a14
3661	chr12	31283500	31283700	200	109.015	2.21709	0.000842546	1	chip1_peak_5629	chr12_31283500_31283700	chr12	31283500	31283700	16777	Lamb1
785	chr8	70600400	70600600	200	109.016	2.21712	0.000177991	1	chip1_peak_1122	chr8_70600400_70600600	chr8	70600400	70600600	76900	Ssbp4
2998	chr17	57225400	57225600	200	109.07	2.2182	0.00069879	1	chip1_peak_4557	chr17_57225400_57225600	chr17	57225400	57225600	18347	Olfr48
423	chr14	27189100	27189300	200	109.129	2.2194	8.59e-05	1	chip1_peak_603	chr14_27189100_27189300	chr14	27189100	27189300	71704	Arhgef3
2614	chr5	32146800	32147000	200	109.175	2.22034	0.000607785	1	chip1_peak_3954	chr5_32146800_32147000	chr5	32146800	32147000	14284	Fosl2
3274	chr4	104800300	104800500	200	109.203	2.22091	0.000756785	1	chip1_peak_4993	chr4_104800300_104800500	chr4	104800300	104800500	110382	C8b
3491	chr13	119692400	119692600	200	109.354	2.22398	0.000800865	1	chip1_peak_5339	chr13_119692400_119692600	chr13	119692400	119692600	208715	Hmgcs1
124	chr16	45999400	45999700	300	109.433	2.2256	1.88e-05	0.856689	chip1_peak_183	chr16_45999400_45999700	chr16	45999400	45999700	433022	Plcxd2
2472	chr13	100831400	100831600	200	109.543	2.22783	0.000578005	1	chip1_peak_3728	chr13_100831400_100831600	chr13	100831400	100831600	69048	Slc30a5
163	chr3	97888500	97888900	400	109.658	2.23016	2.6e-05	0.956389	chip1_peak_241	chr3_97888500_97888900	chr3	97888500	97888900	83679	Pde4dip
831	chr5	122285900	122286100	200	109.758	2.23221	0.000188995	1	chip1_peak_1185	chr5_122285900_122286100	chr5	122285900	122286100	320717	Pptc7
1970	chr9	118606900	118607100	200	109.824	2.23355	0.000459948	1	chip1_peak_2926	chr9_118606900_118607100	chr9	118606900	118607100	104099	Itga9
2784	chr10	81575600	81575800	200	110	2.23713	0.000646853	1	chip1_peak_4215	chr10_81575600_81575800	chr10	81575600	81575800	21886	Tle2
141	chr2	144182100	144182500	400	110.119	2.23954	2.16e-05	0.896405	chip1_peak_205	chr2_144182100_144182500	chr2	144182100	144182500	433481	Gm5535
1658	chr7	19736900	19737100	200	110.199	2.24117	0.000384763	1	chip1_peak_2424	chr7_19736900_19737100	chr7	19736900	19737100	19294	Pvrl2
2198	chr4	106439900	106440100	200	110.232	2.24185	0.000513365	1	chip1_peak_3281	chr4_106439900_106440100	chr4	106439900	106440100	329908	Usp24
1811	chr15	76119800	76120000	200	110.254	2.24228	0.000418074	1	chip1_peak_2666	chr15_76119800_76120000	chr15	76119800	76120000	223650	Eppk1
1812	chr15	76119800	76120000	200	110.254	2.24228	0.000418074	1	chip1_peak_2666	chr15_76119800_76120000	chr15	76119800	76120000	271278	BC024139
212	chr5	20589800	20590100	300	110.257	2.24234	3.83e-05	1	chip1_peak_305	chr5_20589800_20590100	chr5	20589800	20590100	50791	Magi2
779	chr15	76580900	76581200	300	110.328	2.2438	0.000177031	1	chip1_peak_1115	chr15_76580900_76581200	chr15	76580900	76581200	268822	Adck5
870	chr10	62948000	62948200	200	110.369	2.24463	0.000196853	1	chip1_peak_1245	chr10_62948000_62948200	chr10	62948000	62948200	327762	Dna2
214	chr4	103192500	103192800	300	110.372	2.24468	3.87e-05	1	chip1_peak_307	chr4_103192500_103192800	chr4	103192500	103192800	242585	Slc35d1
2427	chr14	70201300	70201500	200	110.383	2.24491	0.000566732	1	chip1_peak_3652	chr14_70201300_70201500	chr14	70201300	70201500	20410	Sorbs3
3558	chr14	25663400	25663700	300	110.386	2.24498	0.000819715	1	chip1_peak_5460	chr14_25663400_25663700	chr14	25663400	25663700	328365	Zmiz1
225	chr10	122449700	122449900	200	110.516	2.24763	3.99e-05	1	chip1_peak_319	chr10_122449700_122449900	chr10	122449700	122449900	54140	Avpr1a
824	chr4	57279200	57279700	500	110.537	2.24806	0.000187752	1	chip1_peak_1177	chr4_57279200_57279700	chr4	57279200	57279700	545622	Ptpn3
3889	chr4	104802500	104802700	200	110.579	2.2489	0.0008937	1	chip1_peak_5994	chr4_104802500_104802700	chr4	104802500	104802700	110382	C8b
514	chr4	140531400	140531600	200	110.657	2.25049	0.000104993	1	chip1_peak_725	chr4_140531400_140531600	chr4	140531400	140531600	72754	Arhgef10l
342	chr12	111818900	111819200	300	110.688	2.25111	6.85e-05	1	chip1_peak_493	chr12_111818900_111819200	chr12	111818900	111819200	68520	Zfyve21
805	chr5	28074000	28074300	300	110.695	2.25126	0.00018208	1	chip1_peak_1149	chr5_28074000_28074300	chr5	28074000	28074300	231070	Insig1
2051	chr8	41031300	41031600	300	110.787	2.25314	0.000477475	1	chip1_peak_3051	chr8_41031300_41031600	chr8	41031300	41031600	102103	Mtus1
1419	chr16	24394700	24394900	200	110.874	2.25489	0.000327677	1	chip1_peak_2071	chr16_24394700_24394900	chr16	24394700	24394900	210126	Lpp
2277	chr4	53079900	53080200	300	110.95	2.25644	0.000529559	1	chip1_peak_3398	chr4_53079900_53080200	chr4	53079900	53080200	11303	Abca1
1377	chr5	120577700	120577900	200	111.023	2.25793	0.000318931	1	chip1_peak_2007	chr5_120577700_120577900	chr5	120577700	120577900	252972	Tpcn1
3403	chr15	103250700	103250900	200	111.029	2.25805	0.00078191	1	chip1_peak_5194	chr15_103250700_103250900	chr15	103250700	103250900	18022	Nfe2
3443	chr1	140380500	140380700	200	111.061	2.25871	0.000790265	1	chip1_peak_5263	chr1_140380500_140380700	chr1	140380500	140380700	240776	Kcnt2
2534	chr10	94808400	94808600	200	111.09	2.2593	0.00059136	1	chip1_peak_3836	chr10_94808400_94808600	chr10	94808400	94808600	54712	Plxnc1
3799	chr19	21651400	21651600	200	111.151	2.26054	0.000876262	1	chip1_peak_5855	chr19_21651400_21651600	chr19	21651400	21651600	66206	1110059E24Rik
947	chr6	90712700	90712900	200	111.233	2.2622	0.000213978	1	chip1_peak_1360	chr6_90712700_90712900	chr6	90712700	90712900	232227	Iqsec1
3822	chr12	76550600	76550800	200	111.276	2.26308	0.000880354	1	chip1_peak_5889	chr12_76550600_76550800	chr12	76550600	76550800	263406	Plekhg3
1297	chr18	64361400	64361700	300	111.32	2.26398	0.000301672	1	chip1_peak_1884	chr18_64361400_64361700	chr18	64361400	64361700	225631	Onecut2
2780	chr4	53107300	53107500	200	111.43	2.2662	0.000645796	1	chip1_peak_4210	chr4_53107300_53107500	chr4	53107300	53107500	11303	Abca1
2947	chr16	35404300	35404500	200	111.517	2.26798	0.000681317	1	chip1_peak_4462	chr16_35404300_35404500	chr16	35404300	35404500	72599	Pdia5
2855	chr1	77514600	77514800	200	111.538	2.26841	0.000663578	1	chip1_peak_4324	chr1_77514600_77514800	chr1	77514600	77514800	13838	Epha4
2630	chr8	124250500	124250700	200	111.597	2.2696	0.000611706	1	chip1_peak_3976	chr8_124250500_124250700	chr8	124250500	124250700	108148	Galnt2
754	chr6	90619400	90619600	200	111.605	2.26976	0.000172392	1	chip1_peak_1086	chr6_90619400_90619600	chr6	90619400	90619600	71699	Slc41a3
2501	chr2	160764800	160765000	200	111.616	2.26999	0.000586123	1	chip1_peak_3787	chr2_160764800_160765000	chr2	160764800	160765000	18803	Plcg1
3126	chr1	40237400	40237600	200	111.667	2.27102	0.000727461	1	chip1_peak_4772	chr1_40237400_40237600	chr1	40237400	40237600	16177	Il1r1
4147	chr12	112658200	112658400	200	111.698	2.27166	0.000947623	1	chip1_peak_6429	chr12_112658200_112658400	chr12	112658200	112658400	11651	Akt1
133	chr7	19632400	19632700	300	111.71	2.2719	2.05e-05	0.891438	chip1_peak_194	chr7_19632400_19632700	chr7	19632400	19632700	56457	Clptm1
3861	chr7	96483000	96483200	200	111.748	2.27267	0.000888203	1	chip1_peak_5949	chr7_96483000_96483200	chr7	96483000	96483200	23966	Tenm4
1766	chr15	67121100	67121300	200	111.868	2.27512	0.000408259	1	chip1_peak_2590	chr15_67121100_67121300	chr15	67121100	67121300	20442	St3gal1
3370	chr7	12980000	12980200	200	111.912	2.27601	0.000777388	1	chip1_peak_5146	chr7_12980000_12980200	chr7	12980000	12980200	269870	Zfp446
1829	chr10	17946400	17946600	200	111.928	2.27633	0.000422961	1	chip1_peak_2698	chr10_17946400_17946600	chr10	17946400	17946600	380629	Heca
245	chr15	10179000	10179300	300	111.936	2.2765	4.57e-05	1	chip1_peak_347	chr15_10179000_10179300	chr15	10179000	10179300	19116	Prlr
1719	chr16	90265200	90265400	200	111.953	2.27684	0.000399657	1	chip1_peak_2520	chr16_90265200_90265400	chr16	90265200	90265400	224432	Scaf4
1454	chr9	122852200	122852400	200	112.012	2.27805	0.000336119	1	chip1_peak_2121	chr9_122852200_122852400	chr9	122852200	122852400	235682	Zfp445
3835	chr10	89442900	89443100	200	112.067	2.27916	0.000882161	1	chip1_peak_5908	chr10_89442900_89443100	chr10	89442900	89443100	237436	Gas2l3
2826	chr2	5138000	5138200	200	112.087	2.27957	0.00065813	1	chip1_peak_4285	chr2_5138000_5138200	chr2	5138000	5138200	74186	Ccdc3
98	chr14	30916400	30916600	200	112.11	2.28004	1.36e-05	0.748796	chip1_peak_150	chr14_30916400_30916600	chr14	30916400	30916600	16426	Itih3
1427	chr6	17501900	17502100	200	112.149	2.28082	0.000330539	1	chip1_peak_2084	chr6_17501900_17502100	chr6	17501900	17502100	66660	Sltm
3992	chr1	62778000	62778200	200	112.26	2.28309	0.000916302	1	chip1_peak_6176	chr1_62778000_62778200	chr1	62778000	62778200	18187	Nrp2
1032	chr1	171285300	171285500	200	112.322	2.28435	0.00023143	1	chip1_peak_1483	chr1_171285300_171285500	chr1	171285300	171285500	30941	Usp21
3045	chr12	79357500	79357700	200	112.336	2.28463	0.000706663	1	chip1_peak_4627	chr12_79357500_79357700	chr12	79357500	79357700	19363	Rad51b
1070	chr12	81199200	81199400	200	112.343	2.28477	0.000240708	1	chip1_peak_1537	chr12_81199200_81199400	chr12	81199200	81199400	110893	Slc8a3
2048	chr15	57825300	57825500	200	112.35	2.28492	0.000476747	1	chip1_peak_3044	chr15_57825300_57825500	chr15	57825300	57825500	387609	Zhx2
646	chr15	67144000	67144300	300	112.352	2.28495	0.000144844	1	chip1_peak_931	chr15_67144000_67144300	chr15	67144000	67144300	20442	St3gal1
1646	chr9	35050600	35050800	200	112.37	2.28533	0.000381306	1	chip1_peak_2408	chr9_35050600_35050800	chr9	35050600	35050800	20443	St3gal4
1224	chr9	70233900	70234100	200	112.425	2.28645	0.000281681	1	chip1_peak_1777	chr9_70233900_70234100	chr9	70233900	70234100	71602	Myo1e
602	chr4	129308400	129308600	200	112.442	2.28678	0.000133632	1	chip1_peak_866	chr4_129308400_129308600	chr4	129308400	129308600	19646	Rbbp4
603	chr4	129308400	129308600	200	112.442	2.28678	0.000133632	1	chip1_peak_866	chr4_129308400_129308600	chr4	129308400	129308600	68828	Sync
4027	chr10	93559900	93560100	200	112.461	2.28718	0.000923106	1	chip1_peak_6235	chr10_93559900_93560100	chr10	93559900	93560100	237465	Ccdc38
3881	chr1	87474500	87474700	200	112.498	2.28793	0.000892299	1	chip1_peak_5982	chr1_87474500_87474700	chr1	87474500	87474700	73234	3110079O15Rik
4180	chr12	70203200	70203400	200	112.579	2.28957	0.000953368	1	chip1_peak_6479	chr12_70203200_70203400	chr12	70203200	70203400	110095	Pygl
599	chr9	21989000	21989200	200	112.594	2.28987	0.000133227	1	chip1_peak_863	chr9_21989000_21989200	chr9	21989000	21989200	71746	Rgl3
4055	chr4	106461500	106461700	200	112.616	2.29033	0.000928421	1	chip1_peak_6279	chr4_106461500_106461700	chr4	106461500	106461700	100102	Pcsk9
569	chr10	81529600	81529800	200	112.632	2.29065	0.000125478	1	chip1_peak_822	chr10_81529600_81529800	chr10	81529600	81529800	14672	Gna11
1004	chr18	35845200	35845500	300	112.656	2.29114	0.000224328	1	chip1_peak_1436	chr18_35845200_35845500	chr18	35845200	35845500	67393	Cxxc5
2143	chr11	102179900	102180100	200	112.68	2.29164	0.000501722	1	chip1_peak_3200	chr11_102179900_102180100	chr11	102179900	102180100	268490	Lsm12
2696	chr1	74040800	74041000	200	112.69	2.29184	0.000625521	1	chip1_peak_4079	chr1_74040800_74041000	chr1	74040800	74041000	21961	Tns1
654	chr5	66099200	66099500	300	112.748	2.29302	0.000146829	1	chip1_peak_944	chr5_66099200_66099500	chr5	66099200	66099500	245945	Rbm47
1390	chr3	121443100	121443300	200	112.828	2.29465	0.000321651	1	chip1_peak_2024	chr3_121443100_121443300	chr3	121443100	121443300	71994	Cnn3
1980	chr15	3570600	3570800	200	112.861	2.29531	0.000462832	1	chip1_peak_2945	chr15_3570600_3570800	chr15	3570600	3570800	58991	Ghrl
2729	chr16	70335100	70335300	200	112.896	2.29602	0.00063273	1	chip1_peak_4131	chr16_70335100_70335300	chr16	70335100	70335300	74185	Gbe1
662	chr8	95135200	95135600	400	112.923	2.29658	0.000148799	1	chip1_peak_956	chr8_95135200_95135600	chr8	95135200	95135600	16582	Kifc3
2155	chr14	32091400	32091600	200	112.956	2.29723	0.000504024	1	chip1_peak_3217	chr14_32091400_32091600	chr14	32091400	32091600	218885	Oxnad1
546	chr16	45964800	45965100	300	113.016	2.29846	0.000117888	1	chip1_peak_783	chr16_45964800_45965100	chr16	45964800	45965100	433022	Plcxd2
403	chr16	35485200	35485400	200	113.139	2.30096	8.25e-05	1	chip1_peak_575	chr16_35485200_35485400	chr16	35485200	35485400	72599	Pdia5
539	chr14	70319000	70319200	200	113.238	2.30297	0.000115571	1	chip1_peak_770	chr14_70319000_70319200	chr14	70319000	70319200	213053	Slc39a14
222	chr8	3251900	3252100	200	113.343	2.30511	3.97e-05	1	chip1_peak_316	chr8_3251900_3252100	chr8	3251900	3252100	16337	Insr
3898	chr8	128454100	128454300	200	113.394	2.30614	0.000894869	1	chip1_peak_6005	chr8_128454100_128454300	chr8	128454100	128454300	18186	Nrp1
1037	chr12	71908600	71908800	200	113.407	2.30641	0.00023259	1	chip1_peak_1490	chr12_71908600_71908800	chr12	71908600	71908800	208846	Daam1
2018	chr5	122690200	122690400	200	113.449	2.30727	0.000470354	1	chip1_peak_3004	chr5_122690200_122690400	chr5	122690200	122690400	18439	P2rx7
3742	chr4	131927600	131927800	200	113.488	2.30807	0.000863036	1	chip1_peak_5763	chr4_131927600_131927800	chr4	131927600	131927800	269587	Epb4.1
1752	chr13	100596700	100596900	200	113.516	2.30863	0.000406406	1	chip1_peak_2572	chr13_100596700_100596900	chr13	100596700	100596900	218518	Marveld2
226	chr1	40253900	40254200	300	113.529	2.3089	4.02e-05	1	chip1_peak_320	chr1_40253900_40254200	chr1	40253900	40254200	16177	Il1r1
1138	chr7	84149200	84149400	200	113.741	2.3132	0.00025887	1	chip1_peak_1643	chr7_84149200_84149400	chr7	84149200	84149400	70178	Abhd17c
2348	chr16	35434600	35434800	200	113.744	2.31326	0.000544214	1	chip1_peak_3508	chr16_35434600_35434800	chr16	35434600	35434800	72599	Pdia5
86	chr11	96823200	96823500	300	113.876	2.31595	9.73e-06	0.592189	chip1_peak_135	chr11_96823200_96823500	chr11	96823200	96823500	18023	Nfe2l1
316	chr15	76578400	76578700	300	113.996	2.31839	6.11e-05	1	chip1_peak_449	chr15_76578400_76578700	chr15	76578400	76578700	268822	Adck5
3987	chr10	87896300	87896500	200	114.032	2.31912	0.000915788	1	chip1_peak_6170	chr10_87896300_87896500	chr10	87896300	87896500	16000	Igf1
51	chr15	3505700	3506300	600	114.077	2.32004	3.17e-06	0.34583	chip1_peak_73	chr15_3505700_3506300	chr15	3505700	3506300	58991	Ghrl
4068	chr13	24358000	24358200	200	114.196	2.32246	0.000931156	1	chip1_peak_6300	chr13_24358000_24358200	chr13	24358000	24358200	12763	Cmah
3600	chr14	65723500	65723700	200	114.281	2.32419	0.000828143	1	chip1_peak_5526	chr14_65723500_65723700	chr14	65723500	65723700	71145	Scara5
4342	chr4	155199600	155199800	200	114.288	2.32434	0.000991104	1	chip1_peak_6755	chr4_155199600_155199800	chr4	155199600	155199800	20481	Ski
1725	chr4	53068900	53069100	200	114.318	2.32494	0.000400614	1	chip1_peak_2528	chr4_53068900_53069100	chr4	53068900	53069100	11303	Abca1
1087	chr18	51166000	51166400	400	114.349	2.32557	0.000245648	1	chip1_peak_1566	chr18_51166000_51166400	chr18	51166000	51166400	71373	Prr16
924	chr17	24901200	24901400	200	114.373	2.32605	0.000208663	1	chip1_peak_1324	chr17_24901200_24901400	chr17	24901200	24901400	30957	Mapk8ip3
4056	chr11	70667600	70667800	200	114.406	2.32673	0.000928887	1	chip1_peak_6281	chr11_70667600_70667800	chr11	70667600	70667800	216873	Spag7
3752	chr12	21324800	21325000	200	114.454	2.32771	0.000865389	1	chip1_peak_5781	chr12_21324800_21325000	chr12	21324800	21325000	11491	Adam17
2799	chr14	30873200	30873500	300	114.499	2.32862	0.000650447	1	chip1_peak_4240	chr14_30873200_30873500	chr14	30873200	30873500	69179	Tmem110
578	chr8	117201500	117201800	300	114.56	2.32986	0.00012719	1	chip1_peak_832	chr8_117201500_117201800	chr8	117201500	117201800	209239	Gan
2054	chr5	25097000	25097200	200	114.643	2.33155	0.000478382	1	chip1_peak_3056	chr5_25097000_25097200	chr5	25097000	25097200	108099	Prkag2
1522	chr6	120465800	120466000	200	114.659	2.33188	0.000351781	1	chip1_peak_2225	chr6_120465800_120466000	chr6	120465800	120466000	16172	Il17ra
1779	chr19	8826800	8827000	200	114.671	2.33211	0.000411813	1	chip1_peak_2609	chr19_8826800_8827000	chr19	8826800	8827000	68693	Hnrnpul2
676	chr8	41070800	41071100	300	114.708	2.33287	0.000153481	1	chip1_peak_976	chr8_41070800_41071100	chr8	41070800	41071100	102103	Mtus1
3452	chr2	180988600	180988800	200	114.74	2.33352	0.000791432	1	chip1_peak_5275	chr2_180988600_180988800	chr2	180988600	180988800	73368	Col20a1
1691	chr2	72154400	72154600	200	114.744	2.3336	0.00039291	1	chip1_peak_2476	chr2_72154400_72154600	chr2	72154400	72154600	56508	Rapgef4
78	chr10	39616400	39617000	600	114.805	2.33485	7.23e-06	0.515954	chip1_peak_116	chr10_39616400_39617000	chr10	39616400	39617000	103213	Traf3ip2
410	chr14	70305100	70305300	200	114.884	2.33646	8.37e-05	1	chip1_peak_584	chr14_70305100_70305300	chr14	70305100	70305300	213053	Slc39a14
3257	chr8	128448400	128448600	200	114.889	2.33656	0.000753475	1	chip1_peak_4970	chr8_128448400_128448600	chr8	128448400	128448600	18186	Nrp1
3829	chr17	28963100	28963300	200	114.946	2.33771	0.000881243	1	chip1_peak_5900	chr17_28963100_28963300	chr17	28963100	28963300	66989	Kctd20
2607	chr1	67134000	67134200	200	114.99	2.33861	0.000606531	1	chip1_peak_3942	chr1_67134000_67134200	chr1	67134000	67134200	227231	Cps1
3910	chr12	25094300	25094500	200	115.216	2.3432	0.000897797	1	chip1_peak_6025	chr12_25094300_25094500	chr12	25094300	25094500	15902	Id2
601	chr9	40782700	40782900	200	115.234	2.34357	0.000133627	1	chip1_peak_865	chr9_40782700_40782900	chr9	40782700	40782900	71566	Clmp
1772	chr1	62705400	62705600	200	115.326	2.34545	0.000409909	1	chip1_peak_2599	chr1_62705400_62705600	chr1	62705400	62705600	18187	Nrp2
2184	chr2	14250300	14250500	200	115.328	2.34549	0.000509961	1	chip1_peak_3262	chr2_14250300_14250500	chr2	14250300	14250500	17533	Mrc1
1121	chr17	13826900	13827300	400	115.334	2.34561	0.000253684	1	chip1_peak_1616	chr17_13826900_13827300	chr17	13826900	13827300	17356	Mllt4
4073	chr5	139353200	139353400	200	115.362	2.34618	0.000932253	1	chip1_peak_6311	chr5_139353200_139353400	chr5	139353200	139353400	545817	Cyp2w1
4231	chr11	51826500	51826700	200	115.479	2.34856	0.000967094	1	chip1_peak_6574	chr11_51826500_51826700	chr11	51826500	51826700	76901	Jade2
2930	chr4	6269800	6270100	300	115.504	2.34907	0.000677593	1	chip1_peak_4436	chr4_6269800_6270100	chr4	6269800	6270100	13122	Cyp7a1
425	chr14	41152900	41153200	300	115.509	2.34917	8.65e-05	1	chip1_peak_606	chr14_41152900_41153200	chr14	41152900	41153200	17194	Mbl1
3448	chr11	87424500	87424700	200	115.516	2.34931	0.000791155	1	chip1_peak_5271	chr11_87424500_87424700	chr11	87424500	87424700	102465902	Mir8115
3449	chr11	87424500	87424700	200	115.516	2.34931	0.000791155	1	chip1_peak_5271	chr11_87424500_87424700	chr11	87424500	87424700	83560	Tex14
1587	chr13	9116900	9117300	400	115.651	2.35205	0.000365422	1	chip1_peak_2312	chr13_9116900_9117300	chr13	9116900	9117300	217980	Larp4b
633	chr9	35111500	35111700	200	115.78	2.35468	0.000140104	1	chip1_peak_910	chr9_35111500_35111700	chr9	35111500	35111700	20443	St3gal4
2738	chr9	22069900	22070200	300	115.818	2.35545	0.000635838	1	chip1_peak_4146	chr9_22069900_22070200	chr9	22069900	22070200	319601	Zfp653
2739	chr9	22069900	22070200	300	115.818	2.35545	0.000635838	1	chip1_peak_4146	chr9_22069900_22070200	chr9	22069900	22070200	751551	Mir680-2
936	chr18	38298100	38298600	500	115.905	2.35722	0.00021186	1	chip1_peak_1344	chr18_38298100_38298600	chr18	38298100	38298600	56736	Rnf14
155	chr10	79887500	79887900	400	115.911	2.35734	2.46e-05	0.944058	chip1_peak_228	chr10_79887500_79887900	chr10	79887500	79887900	100568459	Bc1
156	chr10	79887500	79887900	400	115.911	2.35734	2.46e-05	0.944058	chip1_peak_228	chr10_79887500_79887900	chr10	79887500	79887900	50701	Elane
3673	chr15	44746600	44746800	200	115.934	2.35781	0.000845791	1	chip1_peak_5651	chr15_44746600_44746800	chr15	44746600	44746800	319613	Sybu
2252	chr18	16736300	16736500	200	115.945	2.35803	0.000524402	1	chip1_peak_3363	chr18_16736300_16736500	chr18	16736300	16736500	12558	Cdh2
126	chr4	45474300	45474500	200	115.954	2.35821	1.91e-05	0.864705	chip1_peak_185	chr4_45474300_45474500	chr4	45474300	45474500	230126	Shb
23	chr11	16766700	16767500	800	115.96	2.35834	4.95e-07	0.110516	chip1_peak_29	chr11_16766700_16767500	chr11	16766700	16767500	13649	Egfr
107	chr12	103624100	103624400	300	115.981	2.35876	1.45e-05	0.752843	chip1_peak_161	chr12_103624100_103624400	chr12	103624100	103624400	217847	Serpina10
3294	chr7	122995200	122995400	200	116.017	2.35951	0.00076034	1	chip1_peak_5024	chr7_122995200_122995400	chr7	122995200	122995400	19647	Rbbp6
404	chr7	105597200	105597500	300	116.064	2.36044	8.25e-05	1	chip1_peak_576	chr7_105597200_105597500	chr7	105597200	105597500	15458	Hpx
3495	chr3	129552400	129552600	200	116.117	2.36153	0.000801371	1	chip1_peak_5344	chr3_129552400_129552600	chr3	129552400	129552600	170439	Elovl6
3595	chr7	140945700	140945900	200	116.156	2.36232	0.000826898	1	chip1_peak_5516	chr7_140945700_140945900	chr7	140945700	140945900	212974	Athl1
3018	chr11	11892500	11892700	200	116.156	2.36233	0.000701856	1	chip1_peak_4584	chr11_11892500_11892700	chr11	11892500	11892700	13195	Ddc
3846	chr5	28074900	28075100	200	116.169	2.36259	0.000884587	1	chip1_peak_5924	chr5_28074900_28075100	chr5	28074900	28075100	231070	Insig1
4266	chr4	103172500	103172700	200	116.314	2.36553	0.0009749	1	chip1_peak_6633	chr4_103172500_103172700	chr4	103172500	103172700	242585	Slc35d1
3036	chr11	117993400	117993600	200	116.332	2.36591	0.00070487	1	chip1_peak_4610	chr11_117993400_117993600	chr11	117993400	117993600	74451	Pgs1
3224	chr18	64600600	64600800	200	116.335	2.36597	0.000745951	1	chip1_peak_4915	chr18_64600600_64600800	chr18	64600600	64600800	54670	Atp8b1
3908	chr14	35147800	35148000	200	116.387	2.36702	0.000897562	1	chip1_peak_6023	chr14_35147800_35148000	chr14	35147800	35148000	14803	Grid1
350	chr7	19006000	19006200	200	116.401	2.36731	7e-05	1	chip1_peak_506	chr7_19006000_19006200	chr7	19006000	19006200	272359	Irf2bp1
4245	chr18	12556900	12557100	200	116.417	2.36764	0.000970306	1	chip1_peak_6598	chr18_12556900_12557100	chr18	12556900	12557100	16774	Lama3
1038	chr1	155778400	155778600	200	116.427	2.36784	0.000233411	1	chip1_peak_1492	chr1_155778400_155778600	chr1	155778400	155778600	104009	Qsox1
2118	chr9	46117100	46117400	300	116.469	2.36869	0.000495085	1	chip1_peak_3159	chr9_46117100_46117400	chr9	46117100	46117400	70661	Sik3
3013	chr6	6124900	6125100	200	116.472	2.36874	0.000701182	1	chip1_peak_4577	chr6_6124900_6125100	chr6	6124900	6125100	50799	Slc25a13
4366	chr9	21733500	21733700	200	116.505	2.36942	0.000996239	1	chip1_peak_6801	chr9_21733500_21733700	chr9	21733500	21733700	16835	Ldlr
4368	chr17	56701100	56701300	200	116.558	2.3705	0.000996464	1	chip1_peak_6803	chr17_56701100_56701300	chr17	56701100	56701300	71810	Ranbp3
2340	chr1	164159800	164160000	200	116.633	2.37202	0.000542315	1	chip1_peak_3495	chr1_164159800_164160000	chr1	164159800	164160000	16498	Kcnab2
3248	chr1	89930700	89930900	200	116.646	2.37229	0.000751118	1	chip1_peak_4955	chr1_89930700_89930900	chr1	89930700	89930900	14472	Gbx2
2636	chr1	89107400	89107700	300	116.692	2.37323	0.000613615	1	chip1_peak_3985	chr1_89107400_89107700	chr1	89107400	89107700	98402	Sh3bp4
2187	chr16	87703200	87703400	200	116.817	2.37577	0.000510579	1	chip1_peak_3266	chr16_87703200_87703400	chr16	87703200	87703400	237911	Brip1
561	chr2	72187900	72188100	200	116.818	2.37578	0.00012291	1	chip1_peak_808	chr2_72187900_72188100	chr2	72187900	72188100	56508	Rapgef4
1397	chr8	84795500	84795800	300	116.821	2.37584	0.000323445	1	chip1_peak_2034	chr8_84795500_84795800	chr8	84795500	84795800	18032	Nfix
1516	chr8	122916800	122917200	400	116.917	2.3778	0.00035086	1	chip1_peak_2219	chr8_122916800_122917200	chr8	122916800	122917200	77087	Ankrd11
1211	chr8	108715600	108715800	200	116.964	2.37876	0.000275662	1	chip1_peak_1757	chr8_108715600_108715800	chr8	108715600	108715800	11906	Zfhx3
2229	chr2	103707800	103708000	200	116.991	2.37931	0.00052002	1	chip1_peak_3329	chr2_103707800_103708000	chr2	103707800	103708000	99382	Abtb2
3884	chr4	35121500	35121700	200	117.083	2.38117	0.000893233	1	chip1_peak_5988	chr4_35121500_35121700	chr4	35121500	35121700	214944	Mob3b
2789	chr16	5250900	5251100	200	117.121	2.38195	0.000648198	1	chip1_peak_4225	chr16_5250900_5251100	chr16	5250900	5251100	70511	Eef2kmt
2898	chr17	56585900	56586100	200	117.147	2.38248	0.000672312	1	chip1_peak_4392	chr17_56585900_56586100	chr17	56585900	56586100	224903	Safb
4007	chr13	73787800	73788000	200	117.184	2.38322	0.000920028	1	chip1_peak_6206	chr13_73787800_73788000	chr13	73787800	73788000	20499	Slc12a7
1695	chr4	139282400	139282700	300	117.253	2.38463	0.000394027	1	chip1_peak_2481	chr4_139282400_139282700	chr4	139282400	139282700	12345	Capzb
56	chr7	84112700	84113100	400	117.281	2.3852	3.53e-06	0.364066	chip1_peak_78	chr7_84112700_84113100	chr7	84112700	84113100	70178	Abhd17c
1890	chr5	66094300	66094500	200	117.283	2.38525	0.000443466	1	chip1_peak_2811	chr5_66094300_66094500	chr5	66094300	66094500	245945	Rbm47
4205	chr5	114419700	114419900	200	117.293	2.38544	0.000959842	1	chip1_peak_6528	chr5_114419700_114419900	chr5	114419700	114419900	117146	Ube3b
1350	chr18	60704700	60704900	200	117.373	2.38708	0.000314115	1	chip1_peak_1968	chr18_60704700_60704900	chr18	60704700	60704900	15531	Ndst1
687	chr1	74289500	74290000	500	117.38	2.38721	0.000156959	1	chip1_peak_990	chr1_74289500_74290000	chr1	74289500	74290000	56695	Pnkd
688	chr1	74289500	74290000	500	117.38	2.38721	0.000156959	1	chip1_peak_990	chr1_74289500_74290000	chr1	74289500	74290000	69660	Tmbim1
1379	chr11	77820800	77821100	300	117.452	2.38869	0.000319449	1	chip1_peak_2010	chr11_77820800_77821100	chr11	77820800	77821100	360013	Myo18a
471	chr11	114680500	114680700	200	117.465	2.38895	9.74e-05	1	chip1_peak_671	chr11_114680500_114680700	chr11	114680500	114680700	100526524	Mir466n
472	chr11	114680500	114680700	200	117.465	2.38895	9.74e-05	1	chip1_peak_671	chr11_114680500_114680700	chr11	114680500	114680700	117160	Ttyh2
2548	chr5	137680800	137681100	300	117.477	2.38918	0.000593695	1	chip1_peak_3855	chr5_137680800_137681100	chr5	137680800	137681100	231801	Agfg2
354	chr8	11006000	11006200	200	117.505	2.38976	7.08e-05	1	chip1_peak_511	chr8_11006000_11006200	chr8	11006000	11006200	384783	Irs2
3874	chr9	57720200	57720400	200	117.554	2.39076	0.000890478	1	chip1_peak_5968	chr9_57720200_57720400	chr9	57720200	57720400	353190	Edc3
1155	chr10	80257400	80257600	200	117.607	2.39184	0.000262079	1	chip1_peak_1667	chr10_80257400_80257600	chr10	80257400	80257600	100568459	Bc1
1734	chr12	104339500	104339700	200	117.676	2.39323	0.00040189	1	chip1_peak_2541	chr12_104339500_104339700	chr12	104339500	104339700	20714	Serpina3k
3131	chr2	134518600	134518800	200	117.701	2.39375	0.000728737	1	chip1_peak_4779	chr2_134518600_134518800	chr2	134518600	134518800	15112	Hao1
1187	chr7	101897200	101897400	200	117.703	2.39378	0.000270071	1	chip1_peak_1720	chr7_101897200_101897400	chr7	101897200	101897400	75430	Anapc15
850	chr13	47222800	47223000	200	117.752	2.39478	0.000193726	1	chip1_peak_1212	chr13_47222800_47223000	chr13	47222800	47223000	218215	Rnf144b
547	chr11	16780200	16780700	500	117.766	2.39506	0.000118083	1	chip1_peak_784	chr11_16780200_16780700	chr11	16780200	16780700	13649	Egfr
4141	chr7	114515200	114515400	200	117.79	2.39556	0.000944754	1	chip1_peak_6417	chr7_114515200_114515400	chr7	114515200	114515400	18576	Pde3b
3358	chr15	10284700	10285000	300	117.796	2.39567	0.000775014	1	chip1_peak_5128	chr15_10284700_10285000	chr15	10284700	10285000	19116	Prlr
2058	chr10	78324400	78324600	200	117.87	2.39717	0.000479591	1	chip1_peak_3061	chr10_78324400_78324600	chr10	78324400	78324600	28169	Agpat3
186	chr4	41630100	41630700	600	117.904	2.39787	3.04e-05	1	chip1_peak_267	chr4_41630100_41630700	chr4	41630100	41630700	68922	Dnaic1
2412	chr5	3583700	3583900	200	117.948	2.39876	0.000562022	1	chip1_peak_3622	chr5_3583700_3583900	chr5	3583700	3583900	77036	1700109H08Rik
4025	chr7	132573500	132573700	200	117.956	2.39893	0.000922666	1	chip1_peak_6232	chr7_132573500_132573700	chr7	132573500	132573700	18242	Oat
3847	chr7	134757400	134757600	200	117.975	2.39932	0.000884622	1	chip1_peak_5925	chr7_134757400_134757600	chr7	134757400	134757600	330662	Dock1
586	chr4	53041400	53041600	200	117.975	2.39932	0.00012982	1	chip1_peak_844	chr4_53041400_53041600	chr4	53041400	53041600	11303	Abca1
1391	chr13	43478000	43478300	300	117.994	2.3997	0.00032222	1	chip1_peak_2027	chr13_43478000_43478300	chr13	43478000	43478300	226432	Ipo9
3205	chr5	36390500	36390700	200	117.996	2.39975	0.00074187	1	chip1_peak_4886	chr5_36390500_36390700	chr5	36390500	36390700	81840	Sorcs2
531	chr18	80291300	80291500	200	118.028	2.4004	0.000110203	1	chip1_peak_751	chr18_80291300_80291500	chr18	80291300	80291500	66943	Pqlc1
1817	chr2	36096900	36097100	200	118.031	2.40045	0.000420482	1	chip1_peak_2678	chr2_36096900_36097100	chr2	36096900	36097100	16874	Lhx6
4104	chr12	35507000	35507200	200	118.077	2.4014	0.000936841	1	chip1_peak_6357	chr12_35507000_35507200	chr12	35507000	35507200	11622	Ahr
981	chr19	37439300	37439500	200	118.092	2.4017	0.000219681	1	chip1_peak_1402	chr19_37439300_37439500	chr19	37439300	37439500	15242	Hhex
3587	chr16	91761400	91761600	200	118.141	2.40268	0.000826153	1	chip1_peak_5505	chr16_91761400_91761600	chr16	91761400	91761600	16443	Itsn1
3712	chr10	61145600	61145800	200	118.228	2.40447	0.000856982	1	chip1_peak_5719	chr10_61145600_61145800	chr10	61145600	61145800	20397	Sgpl1
2363	chr8	84738300	84738500	200	118.233	2.40457	0.000547754	1	chip1_peak_3534	chr8_84738300_84738500	chr8	84738300	84738500	18032	Nfix
1567	chr11	75436700	75436900	200	118.24	2.40472	0.000361373	1	chip1_peak_2283	chr11_75436700_75436900	chr11	75436700	75436900	18816	Serpinf2
878	chr13	24947900	24948100	200	118.334	2.40662	0.000198212	1	chip1_peak_1254	chr13_24947900_24948100	chr13	24947900	24948100	14756	Gpld1
3374	chr5	24100000	24100200	200	118.352	2.40698	0.000777753	1	chip1_peak_5151	chr5_24100000_24100200	chr5	24100000	24100200	100499521	Mir3471-1
2842	chr1	156045400	156045600	200	118.368	2.40731	0.000660304	1	chip1_peak_4304	chr1_156045400_156045600	chr1	156045400	156045600	240832	Tor1aip2
3204	chr2	91460900	91461100	200	118.412	2.4082	0.0007418	1	chip1_peak_4885	chr2_91460900_91461100	chr2	91460900	91461100	228357	Lrp4
856	chr5	137115100	137115300	200	118.523	2.41046	0.000194479	1	chip1_peak_1221	chr5_137115100_137115300	chr5	137115100	137115300	384309	Trim56
1438	chr14	31651200	31651400	200	118.568	2.41138	0.000332267	1	chip1_peak_2096	chr14_31651200_31651400	chr14	31651200	31651400	26363	Btd
506	chr8	93123200	93123500	300	118.569	2.4114	0.000104593	1	chip1_peak_716	chr8_93123200_93123500	chr8	93123200	93123500	13884	Ces1c
2507	chr10	127551800	127552000	200	118.579	2.41161	0.000587036	1	chip1_peak_3794	chr10_127551800_127552000	chr10	127551800	127552000	16971	Lrp1
340	chr16	18419500	18419700	200	118.73	2.41467	6.81e-05	1	chip1_peak_491	chr16_18419500_18419700	chr16	18419500	18419700	12846	Comt
1033	chr14	70310800	70311000	200	118.73	2.41468	0.000231442	1	chip1_peak_1484	chr14_70310800_70311000	chr14	70310800	70311000	213053	Slc39a14
3770	chr16	22988600	22988800	200	118.762	2.41533	0.000868437	1	chip1_peak_5808	chr16_22988600_22988800	chr16	22988600	22988800	385643	Kng2
3651	chr3	148889700	148889900	200	118.795	2.41599	0.000841339	1	chip1_peak_5615	chr3_148889700_148889900	chr3	148889700	148889900	99633	Lphn2
53	chrX	101385000	101385200	200	118.937	2.41888	3.39e-06	0.360672	chip1_peak_75	chrX_101385000_101385200	chrX	101385000	101385200	14618	Gjb1
220	chr15	27588100	27588300	200	118.948	2.41911	3.93e-05	1	chip1_peak_314	chr15_27588100_27588300	chr15	27588100	27588300	11732	Ank
3	chr4	41636900	41638800	1900	118.953	2.4192	6.16e-11	0.000120005	chip1_peak_4	chr4_41636900_41638800	chr4	41636900	41638800	68922	Dnaic1
4	chr4	41636900	41638800	1900	118.953	2.4192	6.16e-11	0.000120005	chip1_peak_4	chr4_41636900_41638800	chr4	41636900	41638800	69638	Enho
2309	chr5	90362700	90362900	200	119.018	2.42053	0.000536462	1	chip1_peak_3446	chr5_90362700_90362900	chr5	90362700	90362900	81702	Ankrd17
2080	chr16	31000800	31001000	200	119.055	2.42129	0.000486736	1	chip1_peak_3100	chr16_31000800_31001000	chr16	31000800	31001000	100316676	Mir1195
2081	chr16	31000800	31001000	200	119.055	2.42129	0.000486736	1	chip1_peak_3100	chr16_31000800_31001000	chr16	31000800	31001000	268880	Xxylt1
4376	chr2	167016700	167016900	200	119.089	2.42197	0.000998942	1	chip1_peak_6818	chr2_167016700_167016900	chr2	167016700	167016900	228889	Ddx27
3357	chr16	32164700	32164900	200	119.094	2.42207	0.000774809	1	chip1_peak_5125	chr16_32164700_32164900	chr16	32164700	32164900	224109	Nrros
2546	chr19	3904300	3904500	200	119.228	2.42479	0.000593448	1	chip1_peak_3853	chr19_3904300_3904500	chr19	3904300	3904500	27060	Tcirg1
3772	chr13	48931200	48931400	200	119.263	2.42552	0.000869099	1	chip1_peak_5811	chr13_48931200_48931400	chr13	48931200	48931400	218236	Fam120a
251	chr19	7788700	7789000	300	119.413	2.42856	4.65e-05	1	chip1_peak_356	chr19_7788700_7789000	chr19	7788700	7789000	236149	Slc22a26
2285	chr11	16771900	16772100	200	119.428	2.42886	0.000531822	1	chip1_peak_3413	chr11_16771900_16772100	chr11	16771900	16772100	13649	Egfr
2175	chr11	116986000	116986200	200	119.46	2.42952	0.000507813	1	chip1_peak_3246	chr11_116986000_116986200	chr11	116986000	116986200	268510	Mgat5b
1882	chr10	75408500	75408700	200	119.492	2.43017	0.000441162	1	chip1_peak_2798	chr10_75408500_75408700	chr10	75408500	75408700	103149	Upb1
2624	chr2	60083300	60083500	200	119.625	2.43287	0.000610385	1	chip1_peak_3965	chr2_60083300_60083500	chr2	60083300	60083500	407823	Baz2b
4202	chr7	99943700	99943900	200	119.801	2.43645	0.000959456	1	chip1_peak_6522	chr7_99943700_99943900	chr7	99943700	99943900	108937	Rnf169
2975	chr3	22113900	22114100	200	119.805	2.43654	0.000689791	1	chip1_peak_4517	chr3_22113900_22114100	chr3	22113900	22114100	81004	Tbl1xr1
1559	chr15	7148200	7148400	200	119.86	2.43765	0.000359027	1	chip1_peak_2273	chr15_7148200_7148400	chr15	7148200	7148400	16880	Lifr
1619	chr15	76448700	76448900	200	119.877	2.43799	0.000373448	1	chip1_peak_2361	chr15_76448700_76448900	chr15	76448700	76448900	223658	Mroh1
1463	chr3	118593600	118593800	200	119.994	2.44038	0.000337111	1	chip1_peak_2131	chr3_118593600_118593800	chr3	118593600	118593800	99586	Dpyd
2030	chr19	46306400	46306600	200	120.032	2.44116	0.000472937	1	chip1_peak_3020	chr19_46306400_46306600	chr19	46306400	46306600	18034	Nfkb2
4042	chr5	65478400	65478600	200	120.122	2.44298	0.000925876	1	chip1_peak_6258	chr5_65478400_65478600	chr5	65478400	65478600	68552	Smim14
2003	chr8	84710400	84710600	200	120.152	2.44358	0.000467329	1	chip1_peak_2976	chr8_84710400_84710600	chr8	84710400	84710600	18032	Nfix
1347	chr7	105762300	105762600	300	120.244	2.44546	0.000313699	1	chip1_peak_1965	chr7_105762300_105762600	chr7	105762300	105762600	233651	Dchs1
1531	chr5	25068600	25068800	200	120.316	2.44694	0.000354443	1	chip1_peak_2239	chr5_25068600_25068800	chr5	25068600	25068800	108099	Prkag2
4198	chr4	104796600	104796800	200	120.384	2.4483	0.000959212	1	chip1_peak_6516	chr4_104796600_104796800	chr4	104796600	104796800	110382	C8b
3887	chr13	23598200	23598400	200	120.443	2.4495	0.000893448	1	chip1_peak_5991	chr13_23598200_23598400	chr13	23598200	23598400	319179	Hist1h2be
4059	chr13	42064500	42064700	200	120.49	2.45046	0.000929262	1	chip1_peak_6286	chr13_42064500_42064700	chr13	42064500	42064700	110521	Hivep1
2509	chr18	82687700	82687900	200	120.537	2.45143	0.000587449	1	chip1_peak_3797	chr18_82687700_82687900	chr18	82687700	82687900	329002	Zfp236
2042	chr6	54699000	54699200	200	120.677	2.45426	0.000475803	1	chip1_peak_3036	chr6_54699000_54699200	chr6	54699000	54699200	68235	Mturn
2933	chr4	134127600	134127800	200	120.739	2.45553	0.000678028	1	chip1_peak_4439	chr4_134127600_134127800	chr4	134127600	134127800	73723	Sh3bgrl3
3698	chr7	128616900	128617100	200	120.764	2.45604	0.000853606	1	chip1_peak_5697	chr7_128616900_128617100	chr7	128616900	128617100	101490	Inpp5f
4262	chr4	139388900	139389100	200	120.781	2.45639	0.000973197	1	chip1_peak_6627	chr4_139388900_139389100	chr4	139388900	139389100	69116	Ubr4
178	chr17	5868700	5868900	200	120.936	2.45954	2.85e-05	0.98166	chip1_peak_258	chr17_5868700_5868900	chr17	5868700	5868900	66616	Snx9
8	chr11	16762300	16762900	600	120.965	2.46013	6.81e-09	0.00442065	chip1_peak_10	chr11_16762300_16762900	chr11	16762300	16762900	13649	Egfr
370	chr15	3545900	3546200	300	121.038	2.46162	7.6e-05	1	chip1_peak_531	chr15_3545900_3546200	chr15	3545900	3546200	58991	Ghrl
2263	chr16	35457900	35458200	300	121.074	2.46234	0.000526405	1	chip1_peak_3376	chr16_35457900_35458200	chr16	35457900	35458200	72599	Pdia5
2482	chr2	167944000	167944200	200	121.103	2.46294	0.000582908	1	chip1_peak_3754	chr2_167944000_167944200	chr2	167944000	167944200	19246	Ptpn1
73	chr14	51104400	51104800	400	121.116	2.46319	6.61e-06	0.504576	chip1_peak_107	chr14_51104400_51104800	chr14	51104400	51104800	58809	Rnase4
4134	chr15	77221400	77221600	200	121.218	2.46527	0.000943185	1	chip1_peak_6402	chr15_77221400_77221600	chr15	77221400	77221600	93686	Rbfox2
3238	chr10	80088900	80089100	200	121.263	2.46618	0.000748749	1	chip1_peak_4938	chr10_80088900_80089100	chr10	80088900	80089100	100568459	Bc1
3239	chr10	80088900	80089100	200	121.263	2.46618	0.000748749	1	chip1_peak_4938	chr10_80088900_80089100	chr10	80088900	80089100	216161	Sbno2
2067	chr15	10276200	10276400	200	121.263	2.46619	0.000483084	1	chip1_peak_3077	chr15_10276200_10276400	chr15	10276200	10276400	19116	Prlr
2620	chr2	27199600	27199800	200	121.304	2.46703	0.00060948	1	chip1_peak_3961	chr2_27199600_27199800	chr2	27199600	27199800	192166	Sardh
1432	chr8	124276500	124276700	200	121.337	2.46769	0.000331116	1	chip1_peak_2090	chr8_124276500_124276700	chr8	124276500	124276700	108148	Galnt2
1252	chr1	82590300	82590500	200	121.343	2.46782	0.00028808	1	chip1_peak_1815	chr1_82590300_82590500	chr1	82590300	82590500	12828	Col4a3
2319	chr9	35111200	35111400	200	121.344	2.46782	0.00053758	1	chip1_peak_3459	chr9_35111200_35111400	chr9	35111200	35111400	20443	St3gal4
1982	chr3	83032600	83032800	200	121.362	2.46819	0.000463108	1	chip1_peak_2947	chr3_83032600_83032800	chr3	83032600	83032800	14161	Fga
136	chr8	41064200	41064800	600	121.392	2.4688	2.09e-05	0.896405	chip1_peak_199	chr8_41064200_41064800	chr8	41064200	41064800	102103	Mtus1
2138	chr10	79918600	79918800	200	121.661	2.47428	0.000500889	1	chip1_peak_3190	chr10_79918600_79918800	chr10	79918600	79918800	100568459	Bc1
2139	chr10	79918600	79918800	200	121.661	2.47428	0.000500889	1	chip1_peak_3190	chr10_79918600_79918800	chr10	79918600	79918800	114229	Kiss1r
2009	chr3	62344300	62344600	300	121.673	2.47452	0.000468002	1	chip1_peak_2987	chr3_62344300_62344600	chr3	62344300	62344600	622434	Arhgef26
1743	chr6	119361300	119361500	200	121.705	2.47517	0.000403764	1	chip1_peak_2557	chr6_119361300_119361500	chr6	119361300	119361500	68465	Adipor2
182	chr10	87887500	87887900	400	121.72	2.47549	2.96e-05	0.993526	chip1_peak_263	chr10_87887500_87887900	chr10	87887500	87887900	16000	Igf1
2697	chr7	137313500	137313700	200	121.736	2.4758	0.000625992	1	chip1_peak_4082	chr7_137313500_137313700	chr7	137313500	137313700	228598	Ebf4
1170	chr5	113634300	113634500	200	121.803	2.47718	0.000266391	1	chip1_peak_1695	chr5_113634300_113634500	chr5	113634300	113634500	14747	Cmklr1
2806	chr8	120745500	120745700	200	121.805	2.47721	0.000651537	1	chip1_peak_4249	chr8_120745500_120745700	chr8	120745500	120745700	15900	Irf8
2203	chr10	87875900	87876100	200	121.833	2.47779	0.000514249	1	chip1_peak_3288	chr10_87875900_87876100	chr10	87875900	87876100	16000	Igf1
3142	chr12	70197700	70197900	200	121.844	2.478	0.000730289	1	chip1_peak_4792	chr12_70197700_70197900	chr12	70197700	70197900	110095	Pygl
2311	chr13	96666700	96666900	200	121.86	2.47833	0.000536959	1	chip1_peak_3451	chr13_96666700_96666900	chr13	96666700	96666900	15357	Hmgcr
4149	chr17	30217900	30218100	200	121.865	2.47843	0.00094823	1	chip1_peak_6436	chr17_30217900_30218100	chr17	30217900	30218100	224671	Btbd9
81	chr2	72209700	72210000	300	121.877	2.47867	7.33e-06	0.515954	chip1_peak_118	chr2_72209700_72210000	chr2	72209700	72210000	56508	Rapgef4
1854	chr5	125051300	125051500	200	121.888	2.47889	0.000429982	1	chip1_peak_2740	chr5_125051300_125051500	chr5	125051300	125051500	20602	Ncor2
231	chr5	135728200	135728400	200	121.891	2.47896	4.1e-05	1	chip1_peak_325	chr5_135728200_135728400	chr5	135728200	135728400	18984	Por
3296	chr16	37625000	37625200	200	121.911	2.47937	0.000760555	1	chip1_peak_5028	chr16_37625000_37625200	chr16	37625000	37625200	15233	Hgd
1298	chr17	30079100	30079400	300	121.935	2.47985	0.000301743	1	chip1_peak_1885	chr17_30079100_30079400	chr17	30079100	30079400	21769	Zfand3
4277	chr8	61275300	61275500	200	122.035	2.48189	0.000977322	1	chip1_peak_6650	chr8_61275300_61275500	chr8	61275300	61275500	59009	Sh3rf1
3070	chr7	123186200	123186400	200	122.075	2.48271	0.000713287	1	chip1_peak_4679	chr7_123186200_123186400	chr7	123186200	123186400	233833	Tnrc6a
3056	chr11	117359300	117359500	200	122.136	2.48394	0.000709432	1	chip1_peak_4644	chr11_117359300_117359500	chr11	117359300	117359500	53860	2023-09-09
3838	chr4	106942000	106942200	200	122.164	2.48452	0.000883421	1	chip1_peak_5914	chr4_106942000_106942200	chr4	106942000	106942200	72475	Ssbp3
3625	chr18	64375100	64375300	200	122.34	2.48809	0.000834818	1	chip1_peak_5568	chr18_64375100_64375300	chr18	64375100	64375300	225631	Onecut2
1859	chr4	59584800	59585100	300	122.342	2.48814	0.000433672	1	chip1_peak_2753	chr4_59584800_59585100	chr4	59584800	59585100	72479	Hsdl2
2954	chr1	72839100	72839300	200	122.446	2.49026	0.000684145	1	chip1_peak_4477	chr1_72839100_72839300	chr1	72839100	72839300	16008	Igfbp2
338	chr13	24402400	24402600	200	122.46	2.49052	6.72e-05	1	chip1_peak_488	chr13_24402400_24402600	chr13	24402400	24402600	12763	Cmah
2783	chr19	40679800	40680000	200	122.496	2.49127	0.000646385	1	chip1_peak_4214	chr19_40679800_40680000	chr19	40679800	40680000	12495	Entpd1
3800	chr1	16618000	16618200	200	122.574	2.49285	0.000876501	1	chip1_peak_5857	chr1_16618000_16618200	chr1	16618000	16618200	66799	Ube2w
1151	chr2	167347400	167347600	200	122.625	2.49388	0.000260718	1	chip1_peak_1658	chr2_167347400_167347600	chr2	167347400	167347600	56336	B4galt5
2889	chr19	47348600	47348800	200	122.628	2.49395	0.000670291	1	chip1_peak_4373	chr19_47348600_47348800	chr19	47348600	47348800	14218	Sh3pxd2a
2316	chr14	30897900	30898100	200	122.678	2.49496	0.00053754	1	chip1_peak_3456	chr14_30897900_30898100	chr14	30897900	30898100	16427	Itih4
2186	chr13	34284700	34285000	300	122.72	2.49583	0.000510374	1	chip1_peak_3265	chr13_34284700_34285000	chr13	34284700	34285000	73102	Slc22a23
4282	chr15	31512100	31512300	200	122.818	2.49781	0.000978114	1	chip1_peak_6658	chr15_31512100_31512300	chr15	31512100	31512300	223455	2023-03-06
2047	chr7	44886200	44886400	200	122.846	2.49838	0.000476642	1	chip1_peak_3043	chr7_44886200_44886400	chr7	44886200	44886400	192191	Med9
2678	chr19	6014300	6014500	200	122.887	2.49922	0.000622993	1	chip1_peak_4056	chr19_6014300_6014500	chr19	6014300	6014500	100502985	Gm10814
2679	chr19	6014300	6014500	200	122.887	2.49922	0.000622993	1	chip1_peak_4056	chr19_6014300_6014500	chr19	6014300	6014500	12333	Capn1
272	chr16	35470100	35470400	300	122.897	2.49943	5.04e-05	1	chip1_peak_382	chr16_35470100_35470400	chr16	35470100	35470400	72599	Pdia5
2338	chr10	93548400	93548600	200	122.962	2.50074	0.00054187	1	chip1_peak_3491	chr10_93548400_93548600	chr10	93548400	93548600	237465	Ccdc38
2632	chr4	133061200	133061500	300	122.995	2.50141	0.000612979	1	chip1_peak_3980	chr4_133061200_133061500	chr4	133061200	133061500	230793	Ahdc1
464	chr9	107629700	107629900	200	123.005	2.50161	9.68e-05	1	chip1_peak_664	chr9_107629700_107629900	chr9	107629700	107629900	14678	Gnai2
764	chr12	82337700	82337900	200	123.028	2.50208	0.000173336	1	chip1_peak_1096	chr12_82337700_82337900	chr12	82337700	82337900	217692	Sipa1l1
3809	chr3	88439800	88440000	200	123.054	2.50262	0.000878906	1	chip1_peak_5872	chr3_88439800_88440000	chr3	88439800	88440000	20351	Sema4a
161	chr14	11699900	11700200	300	123.062	2.50278	2.55e-05	0.951762	chip1_peak_236	chr14_11699900_11700200	chr14	11699900	11700200	19270	Ptprg
1538	chr2	91957400	91957600	200	123.079	2.50312	0.000355613	1	chip1_peak_2249	chr2_91957400_91957600	chr2	91957400	91957600	104418	Dgkz
2671	chr6	125332200	125332400	200	123.125	2.50406	0.000621834	1	chip1_peak_4043	chr6_125332200_125332400	chr6	125332200	125332400	20276	Scnn1a
72	chr16	30256500	30256800	300	123.184	2.50525	6.4e-06	0.500143	chip1_peak_105	chr16_30256500_30256800	chr16	30256500	30256800	71756	Cpn2
1946	chr1	75245500	75245700	200	123.217	2.50593	0.000454969	1	chip1_peak_2890	chr1_75245500_75245700	chr1	75245500	75245700	56812	Dnajb2
66	chr2	72201200	72201500	300	123.222	2.50603	4.83e-06	0.430659	chip1_peak_92	chr2_72201200_72201500	chr2	72201200	72201500	56508	Rapgef4
1086	chr3	142386600	142386900	300	123.264	2.50688	0.000245541	1	chip1_peak_1565	chr3_142386600_142386900	chr3	142386600	142386900	56376	Pdlim5
2655	chr14	121237400	121237600	200	123.282	2.50724	0.000618067	1	chip1_peak_4013	chr14_121237400_121237600	chr14	121237400	121237600	223254	Farp1
2812	chr11	101089200	101089400	200	123.297	2.50755	0.000653228	1	chip1_peak_4256	chr11_101089200_101089400	chr11	101089200	101089400	21428	Mlx
3270	chr11	16783700	16783900	200	123.345	2.50853	0.000755622	1	chip1_peak_4987	chr11_16783700_16783900	chr11	16783700	16783900	13649	Egfr
1186	chr19	55798600	55799000	400	123.373	2.5091	0.000269832	1	chip1_peak_1718	chr19_55798600_55799000	chr19	55798600	55799000	21416	Tcf7l2
825	chr12	103628800	103629000	200	123.413	2.5099	0.000188085	1	chip1_peak_1178	chr12_103628800_103629000	chr12	103628800	103629000	217847	Serpina10
3870	chr5	110654800	110655000	200	123.45	2.51067	0.000890123	1	chip1_peak_5962	chr5_110654800_110655000	chr5	110654800	110655000	69663	Ddx51
3983	chr16	43357500	43357700	200	123.496	2.51159	0.000915177	1	chip1_peak_6166	chr16_43357500_43357700	chr16	43357500	43357700	56490	Zbtb20
4032	chr2	166011500	166011700	200	123.519	2.51207	0.000924142	1	chip1_peak_6245	chr2_166011500_166011700	chr2	166011500	166011700	17979	Ncoa3
741	chr12	104412700	104413100	400	123.578	2.51327	0.000170471	1	chip1_peak_1072	chr12_104412700_104413100	chr12	104412700	104413100	20716	Serpina3n
209	chr18	11057600	11058000	400	123.687	2.51549	3.72e-05	1	chip1_peak_300	chr18_11057600_11058000	chr18	11057600	11058000	14465	Gata6
3454	chr8	93120000	93120200	200	123.757	2.51691	0.000792568	1	chip1_peak_5280	chr8_93120000_93120200	chr8	93120000	93120200	13884	Ces1c
1651	chr11	85003700	85003900	200	123.762	2.51701	0.000382922	1	chip1_peak_2415	chr11_85003700_85003900	chr11	85003700	85003900	237898	Usp32
1838	chr12	69891000	69891200	200	123.788	2.51755	0.00042624	1	chip1_peak_2716	chr12_69891000_69891200	chr12	69891000	69891200	399510	Map4k5
2043	chr4	63277200	63277400	200	123.916	2.52013	0.000475863	1	chip1_peak_3037	chr4_63277200_63277400	chr4	63277200	63277400	373864	Col27a1
129	chr3	98760200	98760400	200	123.965	2.52114	1.96e-05	0.874384	chip1_peak_189	chr3_98760200_98760400	chr3	98760200	98760400	15494	Hsd3b3
2744	chr5	97019400	97019600	200	123.977	2.52139	0.000636495	1	chip1_peak_4154	chr5_97019400_97019600	chr5	97019400	97019600	140780	Bmp2k
411	chr13	17718500	17718700	200	123.992	2.52169	8.39e-05	1	chip1_peak_586	chr13_17718500_17718700	chr13	17718500	17718700	69562	Cdk13
4312	chr12	103610800	103611000	200	124.045	2.52277	0.000983432	1	chip1_peak_6698	chr12_103610800_103611000	chr12	103610800	103611000	74521	Ppp4r4
1636	chr15	10226400	10226600	200	124.048	2.52282	0.000377848	1	chip1_peak_2393	chr15_10226400_10226600	chr15	10226400	10226600	19116	Prlr
3903	chr11	100494600	100494800	200	124.084	2.52355	0.000896006	1	chip1_peak_6011	chr11_100494600_100494800	chr11	100494600	100494800	104112	Acly
2349	chr11	16764300	16764500	200	124.091	2.52369	0.000544651	1	chip1_peak_3511	chr11_16764300_16764500	chr11	16764300	16764500	13649	Egfr
1684	chrX	48205600	48205800	200	124.091	2.52371	0.000391121	1	chip1_peak_2466	chrX_48205600_48205800	chrX	48205600	48205800	208884	Zdhhc9
1670	chr14	31201500	31201700	200	124.12	2.52429	0.000387806	1	chip1_peak_2445	chr14_31201500_31201700	chr14	31201500	31201700	64652	Nisch
2670	chr4	136004500	136004700	200	124.154	2.52498	0.000621383	1	chip1_peak_4042	chr4_136004500_136004700	chr4	136004500	136004700	27224	Tceb3
2973	chr14	65710100	65710300	200	124.292	2.5278	0.000689481	1	chip1_peak_4513	chr14_65710100_65710300	chr14	65710100	65710300	71145	Scara5
3857	chr4	140568700	140568900	200	124.413	2.53024	0.000887507	1	chip1_peak_5941	chr4_140568700_140568900	chr4	140568700	140568900	72754	Arhgef10l
2049	chr5	116411800	116412000	200	124.5	2.53202	0.000476766	1	chip1_peak_3045	chr5_116411800_116412000	chr5	116411800	116412000	80888	Hspb8
3216	chr13	34979300	34979500	200	124.597	2.534	0.000745385	1	chip1_peak_4904	chr13_34979300_34979500	chr13	34979300	34979500	23986	Eci2
3731	chr11	98141300	98141500	200	124.601	2.53408	0.000859917	1	chip1_peak_5741	chr11_98141300_98141500	chr11	98141300	98141500	72194	Fbxl20
2673	chr8	41100200	41100400	200	124.618	2.53441	0.000622058	1	chip1_peak_4048	chr8_41100200_41100400	chr8	41100200	41100400	102103	Mtus1
1198	chr1	91380200	91380400	200	124.621	2.53447	0.000272596	1	chip1_peak_1735	chr1_91380200_91380400	chr1	91380200	91380400	67444	Ilkap
747	chr6	149187100	149187300	200	124.731	2.53672	0.00017117	1	chip1_peak_1079	chr6_149187100_149187300	chr6	149187100	149187300	232566	Amn1
826	chr3	87924600	87924800	200	124.776	2.53763	0.000188147	1	chip1_peak_1179	chr3_87924600_87924800	chr3	87924600	87924800	229503	Rrnad1
3333	chr8	107413100	107413300	200	124.795	2.53801	0.00076804	1	chip1_peak_5083	chr8_107413100_107413300	chr8	107413100	107413300	112050	Nobq1
1703	chr4	45479300	45479500	200	124.881	2.53977	0.000394834	1	chip1_peak_2488	chr4_45479300_45479500	chr4	45479300	45479500	230126	Shb
867	chr6	114857700	114857900	200	124.912	2.54041	0.000196479	1	chip1_peak_1241	chr6_114857700_114857900	chr6	114857700	114857900	74244	Atg7
3468	chr8	108855300	108855500	200	124.939	2.54094	0.000796138	1	chip1_peak_5304	chr8_108855300_108855500	chr8	108855300	108855500	11906	Zfhx3
22	chr6	129235100	129235400	300	124.955	2.54128	4.61e-07	0.10468	chip1_peak_28	chr6_129235100_129235400	chr6	129235100	129235400	76432	2310001H17Rik
3871	chr4	129316400	129316600	200	125.078	2.54377	0.000890338	1	chip1_peak_5965	chr4_129316400_129316600	chr4	129316400	129316600	19646	Rbbp4
1147	chr1	133624200	133624400	200	125.161	2.54547	0.000260511	1	chip1_peak_1655	chr1_133624200_133624400	chr1	133624200	133624400	70579	Zc3h11a
651	chr5	135716300	135716600	300	125.19	2.54605	0.000146272	1	chip1_peak_939	chr5_135716300_135716600	chr5	135716300	135716600	18984	Por
1459	chr2	92377500	92377900	400	125.193	2.5461	0.000336485	1	chip1_peak_2127	chr2_92377500_92377900	chr2	92377500	92377900	18633	Pex16
3057	chr10	127309100	127309300	200	125.229	2.54686	0.000709498	1	chip1_peak_4645	chr10_127309100_127309300	chr10	127309100	127309300	216443	Mars
898	chr2	167939600	167939900	300	125.247	2.54722	0.000201322	1	chip1_peak_1277	chr2_167939600_167939900	chr2	167939600	167939900	19246	Ptpn1
4238	chr12	103628400	103628600	200	125.267	2.54762	0.000968753	1	chip1_peak_6585	chr12_103628400_103628600	chr12	103628400	103628600	217847	Serpina10
4230	chr11	100922900	100923100	200	125.282	2.54792	0.00096704	1	chip1_peak_6573	chr11_100922900_100923100	chr11	100922900	100923100	20848	Stat3
721	chr14	100134900	100135400	500	125.344	2.54918	0.000165794	1	chip1_peak_1043	chr14_100134900_100135400	chr14	100134900	100135400	16597	Klf12
2983	chr10	42696800	42697000	200	125.365	2.54961	0.000693834	1	chip1_peak_4530	chr10_42696800_42697000	chr10	42696800	42697000	14628	Ostm1
2221	chr17	30156800	30157000	200	125.434	2.55103	0.000518248	1	chip1_peak_3318	chr17_30156800_30157000	chr17	30156800	30157000	21769	Zfand3
2895	chr7	67715900	67716100	200	125.544	2.55325	0.000671325	1	chip1_peak_4386	chr7_67715900_67716100	chr7	67715900	67716100	67009	Ttc23
1568	chr4	101742500	101742700	200	125.604	2.55448	0.000361557	1	chip1_peak_2284	chr4_101742500_101742700	chr4	101742500	101742700	16847	Lepr
283	chr18	54967800	54968000	200	125.633	2.55505	5.32e-05	1	chip1_peak_401	chr18_54967800_54968000	chr18	54967800	54968000	269023	Zfp608
2993	chr7	75721500	75721700	200	125.645	2.55531	0.00069803	1	chip1_peak_4549	chr7_75721500_75721700	chr7	75721500	75721700	75547	Akap13
1328	chr8	105313200	105313400	200	125.687	2.55617	0.000309233	1	chip1_peak_1929	chr8_105313200_105313400	chr8	105313200	105313400	234684	Lrrc29
553	chrX	139780900	139781300	400	125.785	2.55816	0.000121421	1	chip1_peak_795	chrX_139780900_139781300	chrX	139780900	139781300	622473	Ripply1
588	chr11	83750400	83750600	200	125.788	2.55821	0.000130318	1	chip1_peak_848	chr11_83750400_83750600	chr11	83750400	83750600	66107	Wfdc21
1425	chr11	88620800	88621000	200	125.93	2.5611	0.000329494	1	chip1_peak_2080	chr11_88620800_88621000	chr11	88620800	88621000	76626	Msi2
522	chr1	93431000	93431300	300	126.037	2.56329	0.00010796	1	chip1_peak_739	chr1_93431000_93431300	chr1	93431000	93431300	110611	Hdlbp
352	chr14	25535600	25535800	200	126.06	2.56375	7.07e-05	1	chip1_peak_509	chr14_25535600_25535800	chr14	25535600	25535800	328365	Zmiz1
392	chr11	95387600	95387800	200	126.063	2.56382	8.04e-05	1	chip1_peak_559	chr11_95387600_95387800	chr11	95387600	95387800	110172	Slc35b1
2205	chr16	23493000	23493200	200	126.091	2.56437	0.000514899	1	chip1_peak_3290	chr16_23493000_23493200	chr16	23493000	23493200	17174	Masp1
1671	chr19	5097200	5097400	200	126.148	2.56554	0.000387858	1	chip1_peak_2446	chr19_5097200_5097400	chr19	5097200	5097400	12794	Cnih2
2836	chr15	64145700	64146000	300	126.174	2.56607	0.000659682	1	chip1_peak_4297	chr15_64145700_64146000	chr15	64145700	64146000	13196	Asap1
2692	chr7	79743600	79743800	200	126.217	2.56694	0.000624972	1	chip1_peak_4074	chr7_79743600_79743800	chr7	79743600	79743800	626359	Wdr93
2976	chr7	25681600	25681800	200	126.241	2.56743	0.000690384	1	chip1_peak_4518	chr7_25681600_25681800	chr7	25681600	25681800	232987	B9d2
2596	chr7	126874300	126874500	200	126.291	2.56845	0.000603461	1	chip1_peak_3923	chr7_126874300_126874500	chr7	126874300	126874500	381921	Taok2
501	chr16	35474000	35474200	200	126.325	2.56914	0.000103475	1	chip1_peak_709	chr16_35474000_35474200	chr16	35474000	35474200	72599	Pdia5
2950	chr11	60009300	60009500	200	126.359	2.56983	0.000683683	1	chip1_peak_4473	chr11_60009300_60009500	chr11	60009300	60009500	18618	Pemt
18	chr15	10224700	10225200	500	126.362	2.56989	2.68e-07	0.0730138	chip1_peak_24	chr15_10224700_10225200	chr15	10224700	10225200	19116	Prlr
3064	chr18	16667500	16667700	200	126.389	2.57044	0.000711002	1	chip1_peak_4663	chr18_16667500_16667700	chr18	16667500	16667700	12558	Cdh2
3929	chr5	121637300	121637500	200	126.467	2.57203	0.000901771	1	chip1_peak_6059	chr5_121637300_121637500	chr5	121637300	121637500	71985	Acad10
3106	chr6	118066600	118066800	200	126.55	2.57372	0.000721854	1	chip1_peak_4734	chr6_118066600_118066800	chr6	118066600	118066800	70727	Rasgef1a
1122	chr5	137115400	137115600	200	126.595	2.57464	0.000254595	1	chip1_peak_1619	chr5_137115400_137115600	chr5	137115400	137115600	384309	Trim56
4112	chr3	129611800	129612000	200	126.596	2.57466	0.000938594	1	chip1_peak_6368	chr3_129611800_129612000	chr3	129611800	129612000	170439	Elovl6
3034	chr10	128282700	128283000	300	126.635	2.57544	0.000704479	1	chip1_peak_4606	chr10_128282700_128283000	chr10	128282700	128283000	20847	Stat2
2706	chr1	155803400	155803600	200	126.702	2.5768	0.000628845	1	chip1_peak_4101	chr1_155803400_155803600	chr1	155803400	155803600	104009	Qsox1
1881	chr2	10110200	10110400	200	126.754	2.57786	0.000440981	1	chip1_peak_2797	chr2_10110200_10110400	chr2	10110200	10110400	16425	Itih2
2410	chr3	96565700	96565900	200	126.827	2.57935	0.000561208	1	chip1_peak_3619	chr3_96565700_96565900	chr3	96565700	96565900	100038464	Gm15441
876	chr2	91112300	91112500	200	126.869	2.5802	0.000197886	1	chip1_peak_1252	chr2_91112300_91112500	chr2	91112300	91112500	20375	Spi1
82	chr4	45464500	45464800	300	126.896	2.58075	7.4e-06	0.515954	chip1_peak_119	chr4_45464500_45464800	chr4	45464500	45464800	230126	Shb
2623	chr4	106448100	106448300	200	126.923	2.5813	0.000610115	1	chip1_peak_3964	chr4_106448100_106448300	chr4	106448100	106448300	100102	Pcsk9
3328	chr4	129526300	129526500	200	126.925	2.58134	0.000767495	1	chip1_peak_5078	chr4_129526300_129526500	chr4	129526300	129526500	433759	Hdac1
1630	chr1	165518000	165518200	200	127.012	2.5831	0.000376009	1	chip1_peak_2379	chr1_165518000_165518200	chr1	165518000	165518200	271639	Adcy10
3059	chr3	84176300	84176600	300	127.028	2.58342	0.000710096	1	chip1_peak_4651	chr3_84176300_84176600	chr3	84176300	84176600	80890	Trim2
2571	chr1	132594200	132594400	200	127.028	2.58344	0.000599197	1	chip1_peak_3887	chr1_132594200_132594400	chr1	132594200	132594400	269116	Nfasc
3559	chr10	68183300	68183500	200	127.055	2.58398	0.000819886	1	chip1_peak_5463	chr10_68183300_68183500	chr10	68183300	68183500	71371	Arid5b
1443	chr4	141706900	141707100	200	127.153	2.58598	0.000333672	1	chip1_peak_2103	chr4_141706900_141707100	chr4	141706900	141707100	68817	Ddi2
2587	chr19	43508000	43508200	200	127.164	2.5862	0.000601905	1	chip1_peak_3910	chr19_43508000_43508200	chr19	43508000	43508200	14718	Got1
3853	chr16	20372000	20372200	200	127.166	2.58624	0.000886834	1	chip1_peak_5937	chr16_20372000_20372200	chr16	20372000	20372200	27416	Abcc5
4120	chr2	69387200	69387400	200	127.169	2.5863	0.000940514	1	chip1_peak_6382	chr2_69387200_69387400	chr2	69387200	69387400	241452	Dhrs9
1108	chr2	134541000	134541300	300	127.214	2.58721	0.000251514	1	chip1_peak_1602	chr2_134541000_134541300	chr2	134541000	134541300	15112	Hao1
4246	chr16	31052100	31052300	200	127.34	2.58978	0.000970494	1	chip1_peak_6601	chr16_31052100_31052300	chr16	31052100	31052300	100316676	Mir1195
4247	chr16	31052100	31052300	200	127.34	2.58978	0.000970494	1	chip1_peak_6601	chr16_31052100_31052300	chr16	31052100	31052300	268880	Xxylt1
3750	chr7	45432800	45433000	200	127.441	2.59183	0.000865268	1	chip1_peak_5778	chr7_45432800_45433000	chr7	45432800	45433000	20174	Ruvbl2
483	chr15	85343200	85343500	300	127.449	2.59199	9.93e-05	1	chip1_peak_685	chr15_85343200_85343500	chr15	85343200	85343500	54138	Atxn10
1768	chr17	56026700	56026900	200	127.453	2.59208	0.0004087	1	chip1_peak_2593	chr17_56026700_56026900	chr17	56026700	56026900	20405	Sh3gl1
1373	chr5	92467700	92467900	200	127.544	2.59392	0.000317929	1	chip1_peak_1998	chr5_92467700_92467900	chr5	92467700	92467900	12492	Scarb2
940	chr14	34501300	34501500	200	127.606	2.5952	0.000212676	1	chip1_peak_1350	chr14_34501300_34501500	chr14	34501300	34501500	12166	Bmpr1a
175	chr2	72186100	72186300	200	127.62	2.59547	2.8e-05	0.978114	chip1_peak_255	chr2_72186100_72186300	chr2	72186100	72186300	56508	Rapgef4
2865	chr15	3567400	3567600	200	127.649	2.59606	0.000665109	1	chip1_peak_4338	chr15_3567400_3567600	chr15	3567400	3567600	58991	Ghrl
1947	chr8	128431900	128432100	200	127.673	2.59656	0.000454987	1	chip1_peak_2891	chr8_128431900_128432100	chr8	128431900	128432100	18186	Nrp1
709	chr13	45960200	45960400	200	127.694	2.59697	0.000161394	1	chip1_peak_1023	chr13_45960200_45960400	chr13	45960200	45960400	20238	Atxn1
2414	chr15	77256800	77257000	200	127.706	2.59723	0.000563493	1	chip1_peak_3628	chr15_77256800_77257000	chr15	77256800	77257000	93686	Rbfox2
2828	chr15	86405900	86406100	200	127.739	2.5979	0.000658184	1	chip1_peak_4287	chr15_86405900_86406100	chr15	86405900	86406100	223754	Tbc1d22a
2886	chr10	44335800	44336000	200	127.74	2.59792	0.000670127	1	chip1_peak_4367	chr10_44335800_44336000	chr10	44335800	44336000	11793	Atg5
1629	chr2	77163400	77163600	200	127.769	2.59851	0.000375854	1	chip1_peak_2378	chr2_77163400_77163600	chr2	77163400	77163600	545428	Ccdc141
1706	chr11	75202100	75202300	200	127.822	2.59958	0.000395754	1	chip1_peak_2493	chr11_75202100_75202300	chr11	75202100	75202300	237847	Rtn4rl1
2103	chr4	134750600	134750900	300	127.914	2.60146	0.000491976	1	chip1_peak_3133	chr4_134750600_134750900	chr4	134750600	134750900	100017	Ldlrap1
341	chr5	90552100	90552400	300	127.941	2.602	6.83e-05	1	chip1_peak_492	chr5_90552100_90552400	chr5	90552100	90552400	280662	Afm
1750	chr16	35404600	35404800	200	127.963	2.60244	0.000404808	1	chip1_peak_2566	chr16_35404600_35404800	chr16	35404600	35404800	72599	Pdia5
2199	chr18	12801200	12801400	200	128.02	2.60361	0.000513382	1	chip1_peak_3282	chr18_12801200_12801400	chr18	12801200	12801400	64291	Osbpl1a
517	chr7	44884500	44884800	300	128.056	2.60433	0.000106421	1	chip1_peak_730	chr7_44884500_44884800	chr7	44884500	44884800	192191	Med9
4052	chr7	92903600	92903800	200	128.117	2.60557	0.000928335	1	chip1_peak_6276	chr7_92903600_92903800	chr7	92903600	92903800	72461	Prcp
1713	chr3	19562800	19563000	200	128.175	2.60676	0.00039767	1	chip1_peak_2507	chr3_19562800_19563000	chr3	19562800	19563000	66326	Dnajc5b
1609	chr6	99302300	99302500	200	128.182	2.60689	0.000370728	1	chip1_peak_2346	chr6_99302300_99302500	chr6	99302300	99302500	108655	Foxp1
3310	chr14	40936700	40936900	200	128.219	2.60766	0.000762446	1	chip1_peak_5045	chr14_40936700_40936900	chr14	40936700	40936900	52588	Tspan14
422	chr1	155786900	155787200	300	128.222	2.60772	8.58e-05	1	chip1_peak_602	chr1_155786900_155787200	chr1	155786900	155787200	104009	Qsox1
755	chr6	140516800	140517000	200	128.243	2.60814	0.000172537	1	chip1_peak_1087	chr6_140516800_140517000	chr6	140516800	140517000	109135	Plekha5
399	chr4	106936800	106937000	200	128.293	2.60915	8.2e-05	1	chip1_peak_569	chr4_106936800_106937000	chr4	106936800	106937000	72475	Ssbp3
2540	chr11	106106100	106106300	200	128.366	2.61065	0.000592679	1	chip1_peak_3845	chr11_106106100_106106300	chr11	106106100	106106300	26406	Map3k3
4075	chr13	101707700	101707900	200	128.457	2.61249	0.00093264	1	chip1_peak_6314	chr13_101707700_101707900	chr13	101707700	101707900	18708	Pik3r1
1747	chr11	86939500	86939700	200	128.483	2.61302	0.000404552	1	chip1_peak_2564	chr11_86939500_86939700	chr11	86939500	86939700	102465902	Mir8115
1748	chr11	86939500	86939700	200	128.483	2.61302	0.000404552	1	chip1_peak_2564	chr11_86939500_86939700	chr11	86939500	86939700	77864	Ypel2
2831	chr12	103601700	103601900	200	128.504	2.61345	0.000658595	1	chip1_peak_4290	chr12_103601700_103601900	chr12	103601700	103601900	74521	Ppp4r4
1987	chr4	70481400	70481600	200	128.534	2.61406	0.00046517	1	chip1_peak_2954	chr4_70481400_70481600	chr4	70481400	70481600	230316	Megf9
896	chr5	136963300	136963600	300	128.597	2.61535	0.00020089	1	chip1_peak_1275	chr5_136963300_136963600	chr5	136963300	136963600	110188	Fvis1
2313	chr4	140033400	140033600	200	128.611	2.61562	0.000536992	1	chip1_peak_3453	chr4_140033400_140033600	chr4	140033400	140033600	230868	Igsf21
2166	chr1	89618900	89619100	200	128.739	2.61822	0.000506139	1	chip1_peak_3230	chr1_89618900_89619100	chr1	89618900	89619100	347722	Agap1
3262	chr2	84608000	84608200	200	128.785	2.61916	0.000754647	1	chip1_peak_4977	chr2_84608000_84608200	chr2	84608000	84608200	12388	Ctnnd1
2840	chr12	103613200	103613400	200	128.791	2.61928	0.000659937	1	chip1_peak_4302	chr12_103613200_103613400	chr12	103613200	103613400	74521	Ppp4r4
3450	chr9	83146000	83146200	200	128.805	2.61957	0.000791312	1	chip1_peak_5273	chr9_83146000_83146200	chr9	83146000	83146200	94353	Hmgn3
995	chr8	123979800	123980100	300	128.844	2.62037	0.000223107	1	chip1_peak_1424	chr8_123979800_123980100	chr8	123979800	123980100	56199	Abcb10
3293	chr2	143964100	143964300	200	128.86	2.6207	0.000759547	1	chip1_peak_5021	chr2_143964100_143964300	chr2	143964100	143964300	81910	Rrbp1
1353	chr5	120488500	120488700	200	128.884	2.62118	0.00031442	1	chip1_peak_1972	chr5_120488500_120488700	chr5	120488500	120488700	71772	Plbd2
1878	chr9	108206300	108206500	200	128.982	2.62316	0.000440641	1	chip1_peak_2793	chr9_108206300_108206500	chr9	108206300	108206500	13138	Dag1
467	chr18	33208600	33208800	200	129.005	2.62365	9.7e-05	1	chip1_peak_667	chr18_33208600_33208800	chr18	33208600	33208800	170459	Stard4
3406	chr7	141213100	141213300	200	129.006	2.62365	0.000782332	1	chip1_peak_5199	chr7_141213100_141213300	chr7	141213100	141213300	72000	Lmntd2
1001	chr4	150408100	150408300	200	129.136	2.62631	0.00022393	1	chip1_peak_1433	chr4_150408100_150408300	chr4	150408100	150408300	68703	Rere
1628	chr15	25935100	25935300	200	129.164	2.62688	0.000375718	1	chip1_peak_2377	chr15_25935100_25935300	chr15	25935100	25935300	66270	Fam134b
219	chr12	103602800	103603500	700	129.23	2.62821	3.93e-05	1	chip1_peak_313	chr12_103602800_103603500	chr12	103602800	103603500	74521	Ppp4r4
915	chr6	108238100	108238300	200	129.249	2.6286	0.0002063	1	chip1_peak_1312	chr6_108238100_108238300	chr6	108238100	108238300	16438	Itpr1
4148	chr7	28898800	28899000	200	129.293	2.62951	0.000947733	1	chip1_peak_6431	chr7_28898800_28899000	chr7	28898800	28899000	60595	Actn4
3090	chr5	129527700	129527900	200	129.344	2.63054	0.000717672	1	chip1_peak_4704	chr5_129527700_129527900	chr5	129527700	129527900	231769	Sfswap
4221	chr13	43400900	43401100	200	129.386	2.63138	0.000963674	1	chip1_peak_6552	chr13_43400900_43401100	chr13	43400900	43401100	70078	Nol7
3281	chr15	79692700	79692900	200	129.407	2.63183	0.000758199	1	chip1_peak_5006	chr15_79692700_79692900	chr15	79692700	79692900	14904	Gtpbp1
2283	chr19	7336000	7336300	300	129.47	2.6331	0.00053102	1	chip1_peak_3409	chr19_7336000_7336300	chr19	7336000	7336300	13728	Mark2
3704	chr12	111762300	111762500	200	129.505	2.63382	0.000854426	1	chip1_peak_5704	chr12_111762300_111762500	chr12	111762300	111762500	16593	Klc1
3715	chr8	41198600	41198800	200	129.572	2.63518	0.00085762	1	chip1_peak_5722	chr8_41198600_41198800	chr8	41198600	41198800	234199	Fgl1
642	chr19	7097000	7097200	200	129.6	2.63573	0.000142451	1	chip1_peak_922	chr19_7097000_7097200	chr19	7097000	7097200	107227	Macrod1
643	chr19	7097000	7097200	200	129.6	2.63573	0.000142451	1	chip1_peak_922	chr19_7097000_7097200	chr19	7097000	7097200	396184	Flrt1
3533	chr8	84759700	84759900	200	129.602	2.63579	0.00081361	1	chip1_peak_5418	chr8_84759700_84759900	chr8	84759700	84759900	18032	Nfix
266	chr9	79790300	79790500	200	129.608	2.63591	4.88e-05	1	chip1_peak_376	chr9_79790300_79790500	chr9	79790300	79790500	69981	Tmem30a
527	chr8	41067100	41067300	200	129.636	2.63648	0.000109416	1	chip1_peak_744	chr8_41067100_41067300	chr8	41067100	41067300	102103	Mtus1
285	chrX	60254900	60255200	300	129.659	2.63694	5.37e-05	1	chip1_peak_404	chrX_60254900_60255200	chrX	60254900	60255200	320940	Atp11c
4351	chr14	121349300	121349500	200	129.742	2.63862	0.00099335	1	chip1_peak_6775	chr14_121349300_121349500	chr14	121349300	121349500	223255	Stk24
2731	chr16	38283900	38284100	200	129.756	2.63892	0.000633179	1	chip1_peak_4134	chr16_38283900_38284100	chr16	38283900	38284100	18171	Nr1i2
248	chr4	101240000	101240300	300	129.812	2.64006	4.6e-05	1	chip1_peak_352	chr4_101240000_101240300	chr4	101240000	101240300	16451	Jak1
3288	chr12	113071700	113071900	200	129.822	2.64027	0.000758838	1	chip1_peak_5013	chr12_113071700_113071900	chr12	113071700	113071900	217893	Pacs2
2122	chr11	51712400	51712600	200	129.86	2.64103	0.000496344	1	chip1_peak_3166	chr11_51712400_51712600	chr11	51712400	51712600	77371	Sec24a
1034	chr15	3575800	3576100	300	129.884	2.64152	0.000231933	1	chip1_peak_1486	chr15_3575800_3576100	chr15	3575800	3576100	58991	Ghrl
2786	chr2	160779700	160779900	200	129.902	2.64189	0.000647418	1	chip1_peak_4219	chr2_160779700_160779900	chr2	160779700	160779900	320799	Zhx3
3777	chr1	136905600	136905800	200	129.913	2.6421	0.000871464	1	chip1_peak_5820	chr1_136905600_136905800	chr1	136905600	136905800	26424	Nr5a2
1420	chr6	120938400	120938600	200	129.954	2.64294	0.00032769	1	chip1_peak_2072	chr6_120938400_120938600	chr6	120938400	120938600	194401	Mical3
733	chr14	31014400	31014600	200	129.982	2.64351	0.000167893	1	chip1_peak_1060	chr14_31014400_31014600	chr14	31014400	31014600	30877	Gnl3
1758	chr11	121513400	121513700	300	130.014	2.64416	0.000407339	1	chip1_peak_2581	chr11_121513400_121513700	chr11	121513400	121513700	108903	Tbcd
1759	chr11	121513400	121513700	300	130.014	2.64416	0.000407339	1	chip1_peak_2581	chr11_121513400_121513700	chr11	121513400	121513700	319530	Zfp750
1790	chr7	125676800	125677000	200	130.085	2.64562	0.000413262	1	chip1_peak_2623	chr7_125676800_125677000	chr7	125676800	125677000	233863	Gtf3c1
208	chr9	37146000	37146200	200	130.143	2.64678	3.69e-05	1	chip1_peak_299	chr9_37146000_37146200	chr9	37146000	37146200	208076	Pknox2
17	chr11	16760700	16761300	600	130.157	2.64708	2.65e-07	0.0730138	chip1_peak_23	chr11_16760700_16761300	chr11	16760700	16761300	13649	Egfr
2805	chr4	140715200	140715400	200	130.254	2.64905	0.000651529	1	chip1_peak_4248	chr4_140715200_140715400	chr4	140715200	140715400	108911	Rcc2
117	chr1	155785200	155785800	600	130.266	2.64928	1.67e-05	0.795475	chip1_peak_175	chr1_155785200_155785800	chr1	155785200	155785800	104009	Qsox1
3194	chr4	136238200	136238500	300	130.311	2.65019	0.000739934	1	chip1_peak_4870	chr4_136238200_136238500	chr4	136238200	136238500	230837	Asap3
3821	chr18	36571600	36571800	200	130.311	2.6502	0.000880132	1	chip1_peak_5887	chr18_36571600_36571800	chr18	36571600	36571800	108857	Ankhd1
2260	chr11	113139900	113140100	200	130.334	2.65067	0.000525888	1	chip1_peak_3373	chr11_113139900_113140100	chr11	113139900	113140100	72386	2610035D17Rik
2778	chr8	71477500	71477700	200	130.351	2.65101	0.00064528	1	chip1_peak_4204	chr8_71477500_71477700	chr8	71477500	71477700	382014	Ano8
2444	chr8	41196900	41197200	300	130.367	2.65133	0.000573587	1	chip1_peak_3691	chr8_41196900_41197200	chr8	41196900	41197200	234199	Fgl1
3105	chr8	84971100	84971300	200	130.368	2.65136	0.000721326	1	chip1_peak_4731	chr8_84971100_84971300	chr8	84971100	84971300	21672	Prdx2
3797	chr10	7772600	7772800	200	130.369	2.65138	0.000875272	1	chip1_peak_5850	chr10_7772600_7772800	chr10	7772600	7772800	215751	Ginm1
4051	chr2	119584000	119584200	200	130.382	2.65165	0.000927944	1	chip1_peak_6274	chr2_119584000_119584200	chr2	119584000	119584200	56398	Chp1
58	chr16	35436000	35436400	400	130.51	2.65425	3.77e-06	0.382595	chip1_peak_80	chr16_35436000_35436400	chr16	35436000	35436400	72599	Pdia5
2097	chr19	7133600	7133800	200	130.521	2.65448	0.000491162	1	chip1_peak_3125	chr19_7133600_7133800	chr19	7133600	7133800	107227	Macrod1
2424	chr16	23470200	23470400	200	130.545	2.65495	0.000565083	1	chip1_peak_3643	chr16_23470200_23470400	chr16	23470200	23470400	17174	Masp1
680	chr10	87868100	87868400	300	130.551	2.65507	0.000154572	1	chip1_peak_980	chr10_87868100_87868400	chr10	87868100	87868400	16000	Igf1
349	chr11	100516300	100516600	300	130.572	2.6555	6.99e-05	1	chip1_peak_505	chr11_100516300_100516600	chr11	100516300	100516600	104112	Acly
3222	chr18	80290300	80290500	200	130.578	2.65562	0.000745796	1	chip1_peak_4912	chr18_80290300_80290500	chr18	80290300	80290500	66943	Pqlc1
2894	chr8	123020100	123020400	300	130.593	2.65594	0.000671177	1	chip1_peak_4384	chr8_123020100_123020400	chr8	123020100	123020400	77087	Ankrd11
619	chr9	108043400	108043700	300	130.612	2.65632	0.000136559	1	chip1_peak_889	chr9_108043400_108043700	chr9	108043400	108043700	27399	Ip6k1
3689	chr6	120727400	120727600	200	130.627	2.65663	0.000851606	1	chip1_peak_5684	chr6_120727400_120727600	chr6	120727400	120727600	330409	Cecr2
2681	chr2	59830800	59831000	200	130.641	2.6569	0.000623324	1	chip1_peak_4059	chr2_59830800_59831000	chr2	59830800	59831000	66860	Tanc1
3486	chr17	26578100	26578300	200	130.683	2.65777	0.000799946	1	chip1_peak_5335	chr17_26578100_26578300	chr17	26578100	26578300	67458	Ergic1
42	chr10	127589200	127589500	300	130.693	2.65796	1.79e-06	0.245876	chip1_peak_55	chr10_127589200_127589500	chr10	127589200	127589500	16971	Lrp1
2522	chr18	60223100	60223300	200	130.693	2.65797	0.000588742	1	chip1_peak_3815	chr18_60223100_60223300	chr18	60223100	60223300	240327	Gm4951
3916	chr6	101316700	101316900	200	130.743	2.65898	0.000899642	1	chip1_peak_6038	chr6_101316700_101316900	chr6	101316700	101316900	55983	Pdzrn3
4374	chr12	71984300	71984500	200	130.789	2.65991	0.000998571	1	chip1_peak_6815	chr12_71984300_71984500	chr12	71984300	71984500	208846	Daam1
1157	chr1	178334500	178334700	200	130.807	2.66028	0.000262966	1	chip1_peak_1673	chr1_178334500_178334700	chr1	178334500	178334700	51810	Hnrnpu
713	chr11	120640300	120640600	300	130.822	2.66059	0.000162993	1	chip1_peak_1029	chr11_120640300_120640600	chr11	120640300	120640600	209027	Pycr1
4115	chr7	45500800	45501000	200	130.828	2.66072	0.000939537	1	chip1_peak_6374	chr7_45500800_45501000	chr7	45500800	45501000	18220	Nucb1
4116	chr7	45500800	45501000	200	130.828	2.66072	0.000939537	1	chip1_peak_6374	chr7_45500800_45501000	chr7	45500800	45501000	56734	Tulp2
751	chr2	35034200	35034400	200	130.847	2.6611	0.000171813	1	chip1_peak_1083	chr2_35034200_35034400	chr2	35034200	35034400	15139	Hc
744	chr17	46128300	46128600	300	130.898	2.66214	0.000170723	1	chip1_peak_1075	chr17_46128300_46128600	chr17	46128300	46128600	68565	Mrps18a
3066	chr13	24433200	24433600	400	130.931	2.66282	0.000711402	1	chip1_peak_4670	chr13_24433200_24433600	chr13	24433200	24433600	12763	Cmah
1848	chr11	82915300	82915500	200	131.056	2.66536	0.000428073	1	chip1_peak_2731	chr11_82915300_82915500	chr11	82915300	82915500	217012	Unc45b
59	chr11	115796700	115797000	300	131.097	2.66619	3.95e-06	0.39264	chip1_peak_82	chr11_115796700_115797000	chr11	115796700	115797000	71947	2310067B10Rik
3748	chr18	75621300	75621500	200	131.099	2.66623	0.000864893	1	chip1_peak_5776	chr18_75621300_75621500	chr18	75621300	75621500	269037	Ctif
157	chr11	16770600	16770900	300	131.177	2.66782	2.46e-05	0.944058	chip1_peak_229	chr11_16770600_16770900	chr11	16770600	16770900	13649	Egfr
3518	chr6	94673800	94674000	200	131.272	2.66974	0.000808067	1	chip1_peak_5391	chr6_94673800_94674000	chr6	94673800	94674000	16206	Lrig1
2230	chr5	34475500	34475700	200	131.374	2.67183	0.000520735	1	chip1_peak_3332	chr5_34475500_34475700	chr5	34475500	34475700	231128	Fam193a
946	chr2	155159200	155159400	200	131.374	2.67183	0.000213608	1	chip1_peak_1356	chr2_155159200_155159400	chr2	155159200	155159400	16396	Itch
4164	chr17	80129300	80129500	200	131.387	2.67209	0.000950521	1	chip1_peak_6455	chr17_80129300_80129500	chr17	80129300	80129500	319625	Galm
1577	chr19	5864700	5865000	300	131.394	2.67223	0.000363681	1	chip1_peak_2298	chr19_5864700_5865000	chr19	5864700	5865000	67457	Frmd8
2341	chr3	34036000	34036200	200	131.451	2.67339	0.000542444	1	chip1_peak_3496	chr3_34036000_34036200	chr3	34036000	34036200	14359	Fxr1
2347	chr15	53331300	53331500	200	131.484	2.67406	0.00054382	1	chip1_peak_3506	chr15_53331300_53331500	chr15	53331300	53331500	14042	Ext1
1653	chr1	93143600	93143900	300	131.527	2.67494	0.000383429	1	chip1_peak_2418	chr1_93143600_93143900	chr1	93143600	93143900	11611	Agxt
1740	chr2	134550500	134550700	200	131.546	2.67532	0.000403382	1	chip1_peak_2553	chr2_134550500_134550700	chr2	134550500	134550700	15112	Hao1
3396	chr18	35295600	35295800	200	131.593	2.67628	0.000781416	1	chip1_peak_5184	chr18_35295600_35295800	chr18	35295600	35295800	81500	Sil1
1689	chr6	99392200	99392400	200	131.6	2.67641	0.000392441	1	chip1_peak_2473	chr6_99392200_99392400	chr6	99392200	99392400	108655	Foxp1
1591	chr3	148897400	148897600	200	131.635	2.67712	0.000366749	1	chip1_peak_2317	chr3_148897400_148897600	chr3	148897400	148897600	99633	Lphn2
2851	chr4	133746000	133746200	200	131.653	2.67749	0.0006622	1	chip1_peak_4316	chr4_133746000_133746200	chr4	133746000	133746200	93760	Arid1a
3340	chr6	6200500	6200700	200	131.765	2.67978	0.000768744	1	chip1_peak_5092	chr6_6200500_6200700	chr6	6200500	6200700	50799	Slc25a13
3757	chr17	26579800	26580000	200	131.775	2.67998	0.0008663	1	chip1_peak_5789	chr17_26579800_26580000	chr17	26579800	26580000	67458	Ergic1
2295	chr17	28883500	28883800	300	131.812	2.68073	0.000534329	1	chip1_peak_3429	chr17_28883500_28883800	chr17	28883500	28883800	433091	Pnpla1
46	chr16	10366700	10367000	300	131.813	2.68076	2.37e-06	0.302047	chip1_peak_62	chr16_10366700_10367000	chr16	10366700	10367000	70426	Tekt5
3540	chr16	35616900	35617100	200	131.817	2.68083	0.000815611	1	chip1_peak_5430	chr16_35616900_35617100	chr16	35616900	35617100	20357	Sema5b
75	chr2	72149700	72150000	300	131.833	2.68115	6.7e-06	0.504576	chip1_peak_109	chr2_72149700_72150000	chr2	72149700	72150000	56508	Rapgef4
1835	chr19	8874800	8875000	200	131.849	2.68147	0.000425184	1	chip1_peak_2711	chr19_8874800_8875000	chr19	8874800	8875000	225896	Ubxn1
1039	chr2	132569900	132570100	200	131.849	2.68148	0.000233422	1	chip1_peak_1493	chr2_132569900_132570100	chr2	132569900	132570100	74182	Gpcpd1
2654	chr10	80779800	80780000	200	132.032	2.68519	0.000617386	1	chip1_peak_4011	chr10_80779800_80780000	chr10	80779800	80780000	208266	Dot1l
3235	chr17	30075800	30076000	200	132.045	2.68547	0.000748563	1	chip1_peak_4935	chr17_30075800_30076000	chr17	30075800	30076000	21769	Zfand3
1685	chr15	76586800	76587000	200	132.045	2.68547	0.000392082	1	chip1_peak_2469	chr15_76586800_76587000	chr15	76586800	76587000	268822	Adck5
1325	chr6	134718100	134718400	300	132.047	2.68551	0.000308054	1	chip1_peak_1924	chr6_134718100_134718400	chr6	134718100	134718400	70686	Dusp16
1971	chr8	41072800	41073100	300	132.093	2.68643	0.000460173	1	chip1_peak_2927	chr8_41072800_41073100	chr8	41072800	41073100	102103	Mtus1
2362	chr12	111447400	111447700	300	132.093	2.68644	0.000547648	1	chip1_peak_3533	chr12_111447400_111447700	chr12	111447400	111447700	21928	Tnfaip2
3020	chr9	123779600	123779800	200	132.126	2.68712	0.000702874	1	chip1_peak_4587	chr9_123779600_123779800	chr9	123779600	123779800	12769	Ccr9
344	chr3	98633400	98633600	200	132.166	2.68794	6.88e-05	1	chip1_peak_497	chr3_98633400_98633600	chr3	98633400	98633600	15496	Hsd3b5
3411	chr7	75551100	75551300	200	132.178	2.68818	0.000783643	1	chip1_peak_5207	chr7_75551100_75551300	chr7	75551100	75551300	75547	Akap13
2963	chr10	87878800	87879000	200	132.234	2.68931	0.000687266	1	chip1_peak_4495	chr10_87878800_87879000	chr10	87878800	87879000	16000	Igf1
3776	chr4	150523300	150523500	200	132.268	2.69	0.000871108	1	chip1_peak_5817	chr4_150523300_150523500	chr4	150523300	150523500	68703	Rere
1910	chr5	137352800	137353000	200	132.273	2.6901	0.000448209	1	chip1_peak_2840	chr5_137352800_137353000	chr5	137352800	137353000	13846	Ephb4
3050	chr13	45959700	45959900	200	132.399	2.69267	0.000708275	1	chip1_peak_4638	chr13_45959700_45959900	chr13	45959700	45959900	20238	Atxn1
230	chr14	31630900	31631400	500	132.419	2.69307	4.06e-05	1	chip1_peak_324	chr14_31630900_31631400	chr14	31630900	31631400	56794	Hacl1
2944	chr9	53354700	53354900	200	132.491	2.69453	0.000680895	1	chip1_peak_4457	chr9_53354700_53354900	chr9	53354700	53354900	320051	Exph5
3068	chr15	59334000	59334200	200	132.498	2.69468	0.000712694	1	chip1_peak_4677	chr15_59334000_59334200	chr15	59334000	59334200	223593	E430025E21Rik
2932	chr4	59351700	59351900	200	132.505	2.69483	0.000677836	1	chip1_peak_4438	chr4_59351700_59351900	chr4	59351700	59351900	634731	Susd1
3924	chr14	122112100	122112300	200	132.513	2.69497	0.000900642	1	chip1_peak_6053	chr14_122112100_122112300	chr14	122112100	122112300	68059	Tm9sf2
2923	chr3	116329000	116329200	200	132.519	2.69511	0.000676744	1	chip1_peak_4429	chr3_116329000_116329200	chr3	116329000	116329200	229776	Cdc14a
3083	chr8	91325000	91325200	200	132.548	2.6957	0.000715712	1	chip1_peak_4695	chr8_91325000_91325200	chr8	91325000	91325200	26383	Fto
1893	chr6	97351600	97351800	200	132.569	2.69611	0.000444491	1	chip1_peak_2817	chr6_97351600_97351800	chr6	97351600	97351800	232288	Frmd4b
1501	chr5	130054800	130055000	200	132.63	2.69737	0.00034633	1	chip1_peak_2188	chr5_130054800_130055000	chr5	130054800	130055000	12909	Crcp
3341	chr19	6392600	6393000	400	132.732	2.69944	0.000769219	1	chip1_peak_5097	chr19_6392600_6393000	chr19	6392600	6393000	19309	Pygm
1222	chr19	41358300	41358500	200	132.761	2.70003	0.000281504	1	chip1_peak_1773	chr19_41358300_41358500	chr19	41358300	41358500	83490	Pik3ap1
2301	chr8	3229200	3229400	200	132.771	2.70022	0.000535368	1	chip1_peak_3437	chr8_3229200_3229400	chr8	3229200	3229400	16337	Insr
2559	chr1	175649200	175649400	200	132.789	2.7006	0.000595782	1	chip1_peak_3869	chr1_175649200_175649400	chr1	175649200	175649400	98256	Kmo
2156	chr19	37187600	37187800	200	132.809	2.701	0.000504373	1	chip1_peak_3218	chr19_37187600_37187800	chr19	37187600	37187800	208922	Cpeb3
2157	chr19	37187600	37187800	200	132.809	2.701	0.000504373	1	chip1_peak_3218	chr19_37187600_37187800	chr19	37187600	37187800	319931	A330032B11Rik
436	chr9	121953200	121953500	300	132.863	2.70211	8.93e-05	1	chip1_peak_626	chr9_121953200_121953500	chr9	121953200	121953500	245050	Fam198a
3754	chr18	76006800	76007000	200	132.878	2.70242	0.00086573	1	chip1_peak_5783	chr18_76006800_76007000	chr18	76006800	76007000	207259	Zbtb7c
4165	chr6	7856900	7857100	200	132.918	2.70322	0.000950546	1	chip1_peak_6456	chr6_7856900_7857100	chr6	7856900	7857100	94192	C1galt1
2264	chr11	115801100	115801300	200	132.935	2.70356	0.000526702	1	chip1_peak_3377	chr11_115801100_115801300	chr11	115801100	115801300	140721	Caskin2
977	chr4	140621000	140621300	300	132.986	2.7046	0.000218997	1	chip1_peak_1397	chr4_140621000_140621300	chr4	140621000	140621300	72754	Arhgef10l
128	chr2	90561200	90561600	400	133.045	2.7058	1.94e-05	0.870945	chip1_peak_188	chr2_90561200_90561600	chr2	90561200	90561600	19271	Ptprj
2760	chr3	136871900	136872100	200	133.073	2.70637	0.000641666	1	chip1_peak_4178	chr3_136871900_136872100	chr3	136871900	136872100	19055	Ppp3ca
176	chr12	104410900	104411200	300	133.101	2.70695	2.81e-05	0.97882	chip1_peak_256	chr12_104410900_104411200	chr12	104410900	104411200	20716	Serpina3n
3273	chr4	150399800	150400000	200	133.148	2.70791	0.00075667	1	chip1_peak_4992	chr4_150399800_150400000	chr4	150399800	150400000	68703	Rere
3690	chr5	117245600	117245800	200	133.18	2.70856	0.000852402	1	chip1_peak_5685	chr5_117245600_117245800	chr5	117245600	117245800	330177	Taok3
264	chr12	103612100	103612400	300	133.238	2.70973	4.85e-05	1	chip1_peak_374	chr12_103612100_103612400	chr12	103612100	103612400	74521	Ppp4r4
2609	chr19	25388900	25389100	200	133.239	2.70974	0.000606654	1	chip1_peak_3946	chr19_25388900_25389100	chr19	25388900	25389100	107351	Kank1
4294	chr3	79558000	79558200	200	133.284	2.71067	0.000980804	1	chip1_peak_6675	chr3_79558000_79558200	chr3	79558000	79558200	329679	Fnip2
728	chr4	139314200	139314500	300	133.329	2.71159	0.00016718	1	chip1_peak_1055	chr4_139314200_139314500	chr4	139314200	139314500	110198	Akr7a5
415	chr2	72153200	72153500	300	133.444	2.71392	8.46e-05	1	chip1_peak_592	chr2_72153200_72153500	chr2	72153200	72153500	56508	Rapgef4
2134	chr3	89152800	89153000	200	133.454	2.71413	0.000500155	1	chip1_peak_3185	chr3_89152800_89153000	chr3	89152800	89153000	330953	Hcn4
119	chr4	104843300	104843600	300	133.456	2.71416	1.74e-05	0.816291	chip1_peak_177	chr4_104843300_104843600	chr4	104843300	104843600	230558	C8a
772	chr6	91735600	91735800	200	133.499	2.71504	0.00017486	1	chip1_peak_1107	chr6_91735600_91735800	chr6	91735600	91735800	21366	Slc6a6
91	chr16	97536700	97537200	500	133.536	2.71578	1.07e-05	0.625871	chip1_peak_141	chr16_97536700_97537200	chr16	97536700	97537200	17858	Mx2
2120	chr14	63175100	63175300	200	133.585	2.71678	0.0004952	1	chip1_peak_3161	chr14_63175100_63175300	chr14	63175100	63175300	14137	Fdft1
3646	chr13	24458300	24458500	200	133.59	2.71688	0.000840601	1	chip1_peak_5608	chr13_24458300_24458500	chr13	24458300	24458500	12763	Cmah
1253	chr4	19642400	19642600	200	133.631	2.71773	0.000288584	1	chip1_peak_1818	chr4_19642400_19642600	chr4	19642400	19642600	107568	Wwp1
1447	chr5	123946600	123946800	200	133.652	2.71815	0.000334719	1	chip1_peak_2110	chr5_123946600_123946800	chr5	123946600	123946800	208908	Ccdc62
923	chr18	44437500	44437900	400	133.68	2.71873	0.000208619	1	chip1_peak_1323	chr18_44437500_44437900	chr18	44437500	44437900	328949	Mcc
1280	chr1	91311600	91311800	200	133.738	2.7199	0.000295387	1	chip1_peak_1855	chr1_91311600_91311800	chr1	91311600	91311800	50880	Scly
2071	chr4	40992500	40992700	200	133.754	2.72023	0.000483945	1	chip1_peak_3083	chr4_40992500_40992700	chr4	40992500	40992700	74164	Nfx1
2580	chr5	135728900	135729100	200	133.791	2.72097	0.000600689	1	chip1_peak_3897	chr5_135728900_135729100	chr5	135728900	135729100	18984	Por
3810	chr8	58025200	58025400	200	133.806	2.72129	0.000879202	1	chip1_peak_5874	chr8_58025200_58025400	chr8	58025200	58025400	270049	Galntl6
4287	chr8	119714000	119714200	200	133.849	2.72216	0.000979064	1	chip1_peak_6666	chr8_119714000_119714200	chr8	119714000	119714200	69047	Atp2c2
3492	chr17	53422900	53423100	200	133.868	2.72255	0.000800883	1	chip1_peak_5340	chr17_53422900_53423100	chr17	53422900	53423100	211482	Efhb
4322	chr11	58220200	58220400	200	133.89	2.723	0.00098581	1	chip1_peak_6714	chr11_58220200_58220400	chr11	58220200	58220400	54396	Irgm2
332	chr10	53935900	53936100	200	133.921	2.72362	6.64e-05	1	chip1_peak_481	chr10_53935900_53936100	chr10	53935900	53936100	17155	Man1a
1370	chr10	128953400	128953600	200	133.925	2.7237	0.000317225	1	chip1_peak_1994	chr10_128953400_128953600	chr10	128953400	128953600	16404	Itga7
2536	chr2	26463500	26463700	200	133.975	2.72472	0.000591925	1	chip1_peak_3838	chr2_26463500_26463700	chr2	26463500	26463700	18128	Notch1
3010	chr10	80916000	80916200	200	133.975	2.72473	0.000701122	1	chip1_peak_4573	chr10_80916000_80916200	chr10	80916000	80916200	16907	Lmnb2
2573	chr12	30371700	30372000	300	133.99	2.72503	0.000599319	1	chip1_peak_3889	chr12_30371700_30372000	chr12	30371700	30372000	268534	Sntg2
3648	chr16	35036100	35036300	200	134.025	2.72574	0.000840696	1	chip1_peak_5610	chr16_35036100_35036300	chr16	35036100	35036300	70757	Ptplb
953	chr19	29034600	29034800	200	134.096	2.72718	0.000214614	1	chip1_peak_1366	chr19_29034600_29034800	chr19	29034600	29034800	56248	Ak3
2824	chr11	100548700	100549000	300	134.112	2.72751	0.000657821	1	chip1_peak_4283	chr11_100548700_100549000	chr11	100548700	100549000	74407	Ttc25
3147	chr19	46456800	46457000	200	134.133	2.72792	0.000730894	1	chip1_peak_4800	chr19_46456800_46457000	chr19	46456800	46457000	24069	Sufu
562	chr13	24997400	24997700	300	134.143	2.72814	0.000123098	1	chip1_peak_809	chr13_24997400_24997700	chr13	24997400	24997700	380836	Mrs2
1364	chr1	84274500	84274700	200	134.192	2.72913	0.00031615	1	chip1_peak_1985	chr1_84274500_84274700	chr1	84274500	84274700	107422	Prid1
2940	chr9	35210000	35210200	200	134.208	2.72946	0.000679537	1	chip1_peak_4449	chr9_35210000_35210200	chr9	35210000	35210200	235169	Foxred1
4252	chr5	124245900	124246100	200	134.273	2.73078	0.00097155	1	chip1_peak_6610	chr5_124245900_124246100	chr5	124245900	124246100	19679	Pitpnm2
704	chr15	3495700	3495900	200	134.35	2.73235	0.000160551	1	chip1_peak_1016	chr15_3495700_3495900	chr15	3495700	3495900	58991	Ghrl
827	chr2	168518300	168518500	200	134.352	2.73238	0.000188286	1	chip1_peak_1180	chr2_168518300_168518500	chr2	168518300	168518500	18019	Nfatc2
567	chr2	103591300	103591500	200	134.359	2.73253	0.000123862	1	chip1_peak_817	chr2_103591300_103591500	chr2	103591300	103591500	99382	Abtb2
2732	chr3	28024700	28024900	200	134.371	2.73278	0.00063329	1	chip1_peak_4136	chr3_28024700_28024900	chr3	28024700	28024900	18805	Pld1
4278	chr15	3545200	3545400	200	134.431	2.734	0.000977861	1	chip1_peak_6653	chr15_3545200_3545400	chr15	3545200	3545400	58991	Ghrl
3862	chr19	40396400	40396600	200	134.465	2.73467	0.000888575	1	chip1_peak_5951	chr19_40396400_40396600	chr19	40396400	40396600	20411	Sorbs1
2661	chr4	107018400	107018600	200	134.473	2.73485	0.000619271	1	chip1_peak_4028	chr4_107018400_107018600	chr4	107018400	107018600	72475	Ssbp3
2176	chr4	117962800	117963000	200	134.515	2.7357	0.000507899	1	chip1_peak_3247	chr4_117962800_117963000	chr4	117962800	117963000	20441	St3gal3
3321	chr5	63933000	63933200	200	134.536	2.73612	0.000763995	1	chip1_peak_5061	chr5_63933000_63933200	chr5	63933000	63933200	100532	Rell1
1467	chr5	32153100	32153400	300	134.552	2.73645	0.000338681	1	chip1_peak_2141	chr5_32153100_32153400	chr5	32153100	32153400	14284	Fosl2
313	chr2	60258000	60258400	400	134.567	2.73676	6.06e-05	1	chip1_peak_445	chr2_60258000_60258400	chr2	60258000	60258400	66205	Cd302
2369	chr13	40875900	40876100	200	134.6	2.73742	0.000548849	1	chip1_peak_3544	chr13_40875900_40876100	chr13	40875900	40876100	14538	Gcnt2
4304	chr10	108535200	108535400	200	134.643	2.73831	0.000982422	1	chip1_peak_6688	chr10_108535200_108535400	chr10	108535200	108535400	20979	Syt1
3743	chr6	119391600	119391800	200	134.668	2.73881	0.000863165	1	chip1_peak_5764	chr6_119391600_119391800	chr6	119391600	119391800	68465	Adipor2
1822	chrX	144526000	144526200	200	134.69	2.73926	0.000421382	1	chip1_peak_2686	chrX_144526000_144526200	chrX	144526000	144526200	22067	Trpc5
1098	chr2	181359000	181359200	200	134.723	2.73993	0.000248594	1	chip1_peak_1584	chr2_181359000_181359200	chr2	181359000	181359200	76688	Arfrp1
3976	chr16	38230300	38230500	200	134.742	2.74031	0.000913287	1	chip1_peak_6153	chr16_38230300_38230500	chr16	38230300	38230500	56637	Gsk3b
4067	chr10	53363600	53363800	200	134.862	2.74276	0.000930297	1	chip1_peak_6297	chr10_53363600_53363800	chr10	53363600	53363800	100038725	Cep85l
4172	chr17	86552000	86552200	200	134.865	2.74282	0.000951564	1	chip1_peak_6466	chr17_86552000_86552200	chr17	86552000	86552200	18754	Prkce
872	chr8	105754400	105754600	200	134.875	2.74301	0.000197118	1	chip1_peak_1247	chr8_105754400_105754600	chr8	105754400	105754600	70575	Gfod2
512	chr1	164263700	164263900	200	134.938	2.7443	0.000104819	1	chip1_peak_722	chr1_164263700_164263900	chr1	164263700	164263900	116914	Slc19a2
2921	chr15	10212500	10212700	200	134.985	2.74526	0.000676646	1	chip1_peak_4425	chr15_10212500_10212700	chr15	10212500	10212700	19116	Prlr
2112	chr16	35460600	35460800	200	135.144	2.7485	0.000494461	1	chip1_peak_3151	chr16_35460600_35460800	chr16	35460600	35460800	72599	Pdia5
4083	chr11	94414900	94415100	200	135.151	2.74864	0.000933896	1	chip1_peak_6328	chr11_94414900_94415100	chr11	94414900	94415100	12291	Cacna1g
2242	chr9	114833000	114833200	200	135.201	2.74965	0.000522811	1	chip1_peak_3348	chr9_114833000_114833200	chr9	114833000	114833200	70031	Cmtm8
1603	chr16	17096500	17096700	200	135.307	2.75181	0.000369058	1	chip1_peak_2336	chr16_17096500_17096700	chr16	17096500	17096700	106369	Ypel1
1429	chr2	27406900	27407100	200	135.41	2.75391	0.000330672	1	chip1_peak_2086	chr2_27406900_27407100	chr2	27406900	27407100	22325	Vav2
2919	chr17	65595300	65595500	200	135.424	2.75418	0.00067638	1	chip1_peak_4422	chr17_65595300_65595500	chr17	65595300	65595500	30960	Vapa
3528	chr8	128438800	128439000	200	135.444	2.75459	0.000811946	1	chip1_peak_5411	chr8_128438800_128439000	chr8	128438800	128439000	18186	Nrp1
3708	chr4	143108000	143108200	200	135.473	2.75518	0.000856149	1	chip1_peak_5712	chr4_143108000_143108200	chr4	143108000	143108200	110593	Prdm2
2611	chr12	25094000	25094200	200	135.538	2.7565	0.000607024	1	chip1_peak_3949	chr12_25094000_25094200	chr12	25094000	25094200	15902	Id2
2572	chr8	25619500	25619700	200	135.607	2.75792	0.000599298	1	chip1_peak_3888	chr8_25619500_25619700	chr8	25619500	25619700	234135	Whsc1l1
3930	chr3	118621600	118621800	200	135.62	2.75818	0.000902031	1	chip1_peak_6060	chr3_118621600_118621800	chr3	118621600	118621800	99586	Dpyd
892	chr7	49249800	49250100	300	135.672	2.75922	0.000200722	1	chip1_peak_1272	chr7_49249800_49250100	chr7	49249800	49250100	78286	Nav2
925	chr1	15817500	15817800	300	135.675	2.7593	0.000208671	1	chip1_peak_1325	chr1_15817500_15817800	chr1	15817500	15817800	21749	Terf1
2133	chr12	103625000	103625200	200	135.73	2.76042	0.000499928	1	chip1_peak_3184	chr12_103625000_103625200	chr12	103625000	103625200	217847	Serpina10
2262	chr10	68536800	68537000	200	135.738	2.76058	0.00052639	1	chip1_peak_3375	chr10_68536800_68537000	chr10	68536800	68537000	73287	1700040L02Rik
2	chr1	170395100	170395600	500	135.77	2.76122	4.78e-11	0.000108598	chip1_peak_3	chr1_170395100_170395600	chr1	170395100	170395600	70729	Nos1ap
4138	chr5	147863200	147863400	200	135.81	2.76203	0.000944299	1	chip1_peak_6413	chr5_147863200_147863400	chr5	147863200	147863400	66537	Pomp
4049	chr5	4079400	4079600	200	135.83	2.76244	0.000927779	1	chip1_peak_6271	chr5_4079400_4079600	chr5	4079400	4079600	100986	Akap9
4074	chr15	79140500	79140700	200	135.919	2.76425	0.000932459	1	chip1_peak_6312	chr15_79140500_79140700	chr15	79140500	79140700	27660	1700088E04Rik
3986	chr4	107010400	107010600	200	136.019	2.76628	0.000915647	1	chip1_peak_6169	chr4_107010400_107010600	chr4	107010400	107010600	72475	Ssbp3
454	chr12	30344900	30345200	300	136.023	2.76637	9.35e-05	1	chip1_peak_650	chr12_30344900_30345200	chr12	30344900	30345200	268534	Sntg2
3952	chr16	35419500	35419700	200	136.073	2.76738	0.000907009	1	chip1_peak_6106	chr16_35419500_35419700	chr16	35419500	35419700	72599	Pdia5
4097	chr15	85860700	85860900	200	136.141	2.76877	0.000936052	1	chip1_peak_6350	chr15_85860700_85860900	chr15	85860700	85860900	29870	Gtse1
3691	chr15	83659300	83659500	200	136.158	2.76911	0.000852425	1	chip1_peak_5686	chr15_83659300_83659500	chr15	83659300	83659500	64706	Scube1
2874	chr1	40232200	40232400	200	136.243	2.77085	0.000667537	1	chip1_peak_4349	chr1_40232200_40232400	chr1	40232200	40232400	16177	Il1r1
3601	chr12	87343700	87343900	200	136.251	2.77101	0.000828293	1	chip1_peak_5528	chr12_87343700_87343900	chr12	87343700	87343900	20773	Sptlc2
798	chr17	84298600	84298800	200	136.259	2.77117	0.000180072	1	chip1_peak_1140	chr17_84298600_84298800	chr17	84298600	84298800	240174	Thada
700	chr10	128306800	128307100	300	136.298	2.77196	0.000159847	1	chip1_peak_1007	chr10_128306800_128307100	chr10	128306800	128307100	104058	Panc2
3676	chr9	99666200	99666400	200	136.327	2.77255	0.000846865	1	chip1_peak_5655	chr9_99666200_99666400	chr9	99666200	99666400	72507	Dzip1l
3614	chr2	166944400	166944600	200	136.39	2.77383	0.0008326	1	chip1_peak_5557	chr2_166944400_166944600	chr2	166944400	166944600	110750	Cse1l
4362	chr13	37920400	37920600	200	136.485	2.77577	0.000995815	1	chip1_peak_6793	chr13_37920400_37920600	chr13	37920400	37920600	68750	Rreb1
2144	chr6	114895600	114895800	200	136.506	2.7762	0.000502076	1	chip1_peak_3202	chr6_114895600_114895800	chr6	114895600	114895800	232334	Vgll4
1315	chr6	83326700	83326900	200	136.549	2.77707	0.000306599	1	chip1_peak_1914	chr6_83326700_83326900	chr6	83326700	83326900	232157	Mob1a
2225	chr12	30175500	30175800	300	136.632	2.77875	0.000519343	1	chip1_peak_3324	chr12_30175500_30175800	chr12	30175500	30175800	268534	Sntg2
3004	chr10	4670100	4670300	200	136.67	2.77953	0.000699974	1	chip1_peak_4565	chr10_4670100_4670300	chr10	4670100	4670300	13982	Esr1
468	chr7	17016600	17016800	200	136.683	2.77979	9.71e-05	1	chip1_peak_668	chr7_17016600_17016800	chr7	17016600	17016800	19060	Ppp5c
4248	chr8	127152200	127152400	200	136.741	2.78098	0.00097058	1	chip1_peak_6602	chr8_127152200_127152400	chr8	127152200	127152400	93742	Pard3
3536	chr14	24210000	24210200	200	136.753	2.78121	0.000814355	1	chip1_peak_5425	chr14_24210000_24210200	chr14	24210000	24210200	71228	Dlg5
2159	chr2	38528000	38528200	200	136.768	2.78152	0.00050475	1	chip1_peak_3222	chr2_38528000_38528200	chr2	38528000	38528200	59126	Nek6
3234	chr10	40123300	40123500	200	136.792	2.78201	0.000748306	1	chip1_peak_4932	chr10_40123300_40123500	chr10	40123300	40123500	72472	Slc16a10
4241	chr15	10335300	10335500	200	136.824	2.78267	0.000969401	1	chip1_peak_6591	chr15_10335300_10335500	chr15	10335300	10335500	19116	Prlr
3320	chr7	25236600	25236800	200	136.834	2.78286	0.000763953	1	chip1_peak_5060	chr7_25236600_25236800	chr7	25236600	25236800	606496	Gsk3a
1720	chr11	109692800	109693100	300	136.867	2.78353	0.000399994	1	chip1_peak_2521	chr11_109692800_109693100	chr11	109692800	109693100	208659	Fam20a
1343	chr15	81813400	81813600	200	137.003	2.78629	0.000312599	1	chip1_peak_1960	chr15_81813400_81813600	chr15	81813400	81813600	21685	Tef
1620	chr12	111710800	111711000	200	137.01	2.78644	0.000373563	1	chip1_peak_2363	chr12_111710800_111711000	chr12	111710800	111711000	70369	Bag5
433	chr15	10692200	10692500	300	137.028	2.7868	8.9e-05	1	chip1_peak_622	chr15_10692200_10692500	chr15	10692200	10692500	75646	Rai14
428	chr17	26948900	26949100	200	137.1	2.78827	8.68e-05	1	chip1_peak_611	chr17_26948900_26949100	chr17	26948900	26949100	240057	Syngap1
92	chr14	70306500	70307000	500	137.121	2.78871	1.12e-05	0.651355	chip1_peak_142	chr14_70306500_70307000	chr14	70306500	70307000	213053	Slc39a14
2228	chr16	24401000	24401200	200	137.13	2.78887	0.000519582	1	chip1_peak_3327	chr16_24401000_24401200	chr16	24401000	24401200	210126	Lpp
3607	chr5	147446800	147447000	200	137.172	2.78973	0.000831178	1	chip1_peak_5542	chr5_147446800_147447000	chr5	147446800	147447000	72587	Pan3
3169	chr15	7136500	7136700	200	137.21	2.79051	0.000734174	1	chip1_peak_4833	chr15_7136500_7136700	chr15	7136500	7136700	16880	Lifr
1933	chr19	5116700	5116900	200	137.36	2.79356	0.000452274	1	chip1_peak_2872	chr19_5116700_5116900	chr19	5116700	5116900	16594	Klc2
3564	chr5	125501400	125501600	200	137.386	2.79409	0.000821198	1	chip1_peak_5471	chr5_125501400_125501600	chr5	125501400	125501600	78894	Aacs
2924	chr8	25650900	25651100	200	137.443	2.79525	0.000676944	1	chip1_peak_4430	chr8_25650900_25651100	chr8	25650900	25651100	234135	Whsc1l1
2597	chr15	77249300	77249500	200	137.445	2.79529	0.000603728	1	chip1_peak_3924	chr15_77249300_77249500	chr15	77249300	77249500	93686	Rbfox2
4168	chr6	22341400	22341600	200	137.461	2.79562	0.000951117	1	chip1_peak_6461	chr6_22341400_22341600	chr6	22341400	22341600	27999	Fam3c
274	chr11	120469000	120469200	200	137.565	2.79772	5.09e-05	1	chip1_peak_387	chr11_120469000_120469200	chr11	120469000	120469200	15239	Hgs
2858	chr4	96641200	96641500	300	137.598	2.7984	0.000663832	1	chip1_peak_4328	chr4_96641200_96641500	chr4	96641200	96641500	13109	Cyp2j5
2005	chr6	116228200	116228400	200	137.643	2.79931	0.000467619	1	chip1_peak_2981	chr6_116228200_116228400	chr6	116228200	116228400	28006	Fam21
395	chr1	93378300	93378500	200	137.677	2.80001	8.12e-05	1	chip1_peak_562	chr1_93378300_93378500	chr1	93378300	93378500	404545	Ano7
2268	chr5	112491700	112491900	200	137.737	2.80123	0.000528288	1	chip1_peak_3385	chr5_112491700_112491900	chr5	112491700	112491900	56747	Sez6l
536	chr7	35749000	35749200	200	137.783	2.80217	0.000112293	1	chip1_peak_760	chr7_35749000_35749200	chr7	35749000	35749200	233115	Dpy19l3
1975	chr8	125227400	125227600	200	137.833	2.80319	0.00046075	1	chip1_peak_2932	chr8_125227400_125227600	chr8	125227400	125227600	244667	Disc1
838	chr4	126172200	126172400	200	137.882	2.80418	0.000190381	1	chip1_peak_1194	chr4_126172200_126172400	chr4	126172200	126172400	230753	Thrap3
2550	chr15	86178100	86178300	200	137.898	2.80451	0.000594263	1	chip1_peak_3857	chr15_86178100_86178300	chr15	86178100	86178300	223753	Cerk
2967	chr1	170202200	170202400	200	137.907	2.80469	0.00068797	1	chip1_peak_4503	chr1_170202200_170202400	chr1	170202200	170202400	16589	Uhmk1
9	chr4	123041100	123041600	500	137.946	2.80547	9.71e-09	0.00551561	chip1_peak_11	chr4_123041100_123041600	chr4	123041100	123041600	66966	Trit1
880	chr2	155963200	155963400	200	137.963	2.80581	0.00019835	1	chip1_peak_1256	chr2_155963200_155963400	chr2	155963200	155963400	16328	Cep250
203	chr16	35469600	35469900	300	138.023	2.80704	3.47e-05	1	chip1_peak_289	chr16_35469600_35469900	chr16	35469600	35469900	72599	Pdia5
1375	chr11	120076800	120077000	200	138.03	2.80719	0.000318852	1	chip1_peak_2005	chr11_120076800_120077000	chr11	120076800	120077000	12009	Cep131
2192	chr2	143948900	143949100	200	138.071	2.80802	0.00051216	1	chip1_peak_3273	chr2_143948900_143949100	chr2	143948900	143949100	81910	Rrbp1
1908	chr8	127199700	127199900	200	138.099	2.80859	0.000447826	1	chip1_peak_2838	chr8_127199700_127199900	chr8	127199700	127199900	93742	Pard3
2194	chr1	40231900	40232100	200	138.199	2.81063	0.000512431	1	chip1_peak_3275	chr1_40231900_40232100	chr1	40231900	40232100	16177	Il1r1
1815	chr9	65882600	65882800	200	138.236	2.81138	0.000418646	1	chip1_peak_2669	chr9_65882600_65882800	chr9	65882600	65882800	56404	Trip4
702	chr7	127018500	127018700	200	138.253	2.81172	0.000160383	1	chip1_peak_1013	chr7_127018500_127018700	chr7	127018500	127018700	69017	Prrt2
2024	chr11	53287500	53287700	200	138.284	2.81235	0.000472384	1	chip1_peak_3014	chr11_53287500_53287700	chr11	53287500	53287700	15525	Hspa4
355	chr1	155780300	155780500	200	138.297	2.81262	7.12e-05	1	chip1_peak_512	chr1_155780300_155780500	chr1	155780300	155780500	104009	Qsox1
4264	chr18	5642600	5642800	200	138.321	2.8131	0.000974593	1	chip1_peak_6631	chr18_5642600_5642800	chr18	5642600	5642800	21417	Zeb1
597	chr18	75536500	75536800	300	138.393	2.81456	0.000132752	1	chip1_peak_860	chr18_75536500_75536800	chr18	75536500	75536800	269037	Ctif
2969	chr12	82196700	82196900	200	138.395	2.8146	0.000688142	1	chip1_peak_4505	chr12_82196700_82196900	chr12	82196700	82196900	217692	Sipa1l1
202	chr5	66080200	66080400	200	138.447	2.81566	3.46e-05	1	chip1_peak_287	chr5_66080200_66080400	chr5	66080200	66080400	245945	Rbm47
3132	chr11	20104500	20104700	200	138.452	2.81577	0.000729347	1	chip1_peak_4782	chr11_20104500_20104700	chr11	20104500	20104700	66713	Actr2
982	chr10	68531200	68531400	200	138.478	2.8163	0.000219817	1	chip1_peak_1403	chr10_68531200_68531400	chr10	68531200	68531400	73287	1700040L02Rik
2643	chr8	3597800	3598000	200	138.507	2.81689	0.000615444	1	chip1_peak_3996	chr8_3597800_3598000	chr8	3597800	3598000	69697	Camsap3
3206	chr16	14362000	14362200	200	138.533	2.81741	0.000741893	1	chip1_peak_4887	chr16_14362000_14362200	chr16	14362000	14362200	17250	Abcc1
1455	chr19	9986900	9987200	300	138.564	2.81805	0.000336197	1	chip1_peak_2122	chr19_9986900_9987200	chr19	9986900	9987200	24115	Best1
2987	chr11	78229300	78229500	200	138.593	2.81865	0.00069538	1	chip1_peak_4537	chr11_78229300_78229500	chr11	78229300	78229500	20926	Supt6
271	chr12	70222600	70222800	200	138.717	2.82116	4.99e-05	1	chip1_peak_381	chr12_70222600_70222800	chr12	70222600	70222800	110095	Pygl
3641	chr19	41342600	41342800	200	138.785	2.82255	0.000838756	1	chip1_peak_5599	chr19_41342600_41342800	chr19	41342600	41342800	83490	Pik3ap1
3960	chr6	72702200	72702400	200	138.809	2.82303	0.00090832	1	chip1_peak_6121	chr6_72702200_72702400	chr6	72702200	72702400	21415	Tcf7l1
706	chr11	100920900	100921100	200	138.819	2.82323	0.000160701	1	chip1_peak_1018	chr11_100920900_100921100	chr11	100920900	100921100	20848	Stat3
2072	chr15	76218400	76218600	200	138.848	2.82383	0.000484146	1	chip1_peak_3085	chr15_76218400_76218600	chr15	76218400	76218600	18810	Plec
2148	chr19	37551500	37551700	200	138.855	2.82397	0.000503135	1	chip1_peak_3208	chr19_37551500_37551700	chr19	37551500	37551700	107371	Exoc6
1519	chr9	108392400	108392600	200	138.868	2.82422	0.000351378	1	chip1_peak_2222	chr9_108392400_108392600	chr9	108392400	108392600	22258	Usp4
442	chr2	5058000	5058300	300	138.919	2.82526	9.05e-05	1	chip1_peak_632	chr2_5058000_5058300	chr2	5058000	5058300	71648	Optn
967	chr18	6990900	6991100	200	138.922	2.82532	0.000217288	1	chip1_peak_1382	chr18_6990900_6991100	chr18	6990900	6991100	210719	Mkx
3520	chr1	166291200	166291400	200	138.962	2.82614	0.000808342	1	chip1_peak_5395	chr1_166291200_166291400	chr1	166291200	166291400	100039795	Ildr2
1777	chr2	25041000	25041200	200	138.971	2.82632	0.000410946	1	chip1_peak_2606	chr2_25041000_25041200	chr2	25041000	25041200	241274	Pnpla7
4108	chr16	5019300	5019500	200	139.026	2.82744	0.000937971	1	chip1_peak_6364	chr16_5019300_5019500	chr16	5019300	5019500	74022	Glyr1
584	chr14	31608200	31608400	200	139.058	2.82809	0.000129485	1	chip1_peak_841	chr14_31608200_31608400	chr14	31608200	31608400	56794	Hacl1
2426	chr14	65684800	65685100	300	139.087	2.82868	0.000565548	1	chip1_peak_3646	chr14_65684800_65685100	chr14	65684800	65685100	71145	Scara5
1654	chr19	41932000	41932500	500	139.096	2.82886	0.000384382	1	chip1_peak_2420	chr19_41932000_41932500	chr19	41932000	41932500	66583	Exosc1
2658	chr16	8589700	8589900	200	139.106	2.82907	0.000618599	1	chip1_peak_4020	chr16_8589700_8589900	chr16	8589700	8589900	268860	Abat
268	chr14	60686000	60686300	300	139.114	2.82923	4.94e-05	1	chip1_peak_378	chr14_60686000_60686300	chr14	60686000	60686300	219140	Spata13
1392	chr1	75189000	75189300	300	139.138	2.82972	0.000322541	1	chip1_peak_2028	chr1_75189000_75189300	chr1	75189000	75189300	245860	Atg9a
1480	chr6	127104700	127104900	200	139.143	2.82981	0.000342099	1	chip1_peak_2160	chr6_127104700_127104900	chr6	127104700	127104900	319801	9630033F20Rik
778	chr10	75440400	75440600	200	139.148	2.82993	0.000176776	1	chip1_peak_1114	chr10_75440400_75440600	chr10	75440400	75440600	103149	Upb1
4143	chr16	91410200	91410400	200	139.187	2.83072	0.000945202	1	chip1_peak_6420	chr16_91410200_91410400	chr16	91410200	91410400	16155	Il10rb
1641	chr1	59173100	59173300	200	139.208	2.83114	0.000380239	1	chip1_peak_2400	chr1_59173100_59173300	chr1	59173100	59173300	74018	Als2
1116	chr4	124703600	124703900	300	139.227	2.83152	0.000253071	1	chip1_peak_1611	chr4_124703600_124703900	chr4	124703600	124703900	14201	Fhl3
2374	chr10	18482500	18482700	200	139.284	2.8327	0.000549257	1	chip1_peak_3549	chr10_18482500_18482700	chr10	18482500	18482700	215819	Nhsl1
846	chr13	94257200	94257400	200	139.384	2.83472	0.000192631	1	chip1_peak_1205	chr13_94257200_94257400	chr13	94257200	94257400	107767	Scamp1
377	chr8	5102400	5102700	300	139.391	2.83486	7.85e-05	1	chip1_peak_541	chr8_5102400_5102700	chr8	5102400	5102700	20494	Slc10a2
1701	chr8	72469900	72470100	200	139.45	2.83606	0.00039478	1	chip1_peak_2487	chr8_72469900_72470100	chr8	72469900	72470100	102465647	Mir7068
1702	chr8	72469900	72470100	200	139.45	2.83606	0.00039478	1	chip1_peak_2487	chr8_72469900_72470100	chr8	72469900	72470100	27967	Cherp
1606	chr4	34967900	34968100	200	139.461	2.83629	0.000369886	1	chip1_peak_2341	chr4_34967900_34968100	chr4	34967900	34968100	214944	Mob3b
228	chr6	90716900	90717300	400	139.469	2.83646	4.06e-05	1	chip1_peak_322	chr6_90716900_90717300	chr6	90716900	90717300	232227	Iqsec1
3103	chr14	60745800	60746000	200	139.53	2.83768	0.0007211	1	chip1_peak_4728	chr14_60745800_60746000	chr14	60745800	60746000	219140	Spata13
2765	chr6	124754700	124754900	200	139.536	2.83781	0.00064242	1	chip1_peak_4186	chr6_124754700_124754900	chr6	124754700	124754900	13498	Atn1
64	chr18	64387900	64388400	500	139.619	2.83951	4.38e-06	0.406507	chip1_peak_87	chr18_64387900_64388400	chr18	64387900	64388400	225631	Onecut2
941	chr1	87232900	87233100	200	139.676	2.84066	0.000212854	1	chip1_peak_1351	chr1_87232900_87233100	chr1	87232900	87233100	26987	Eif4e2
4130	chr5	151186000	151186200	200	139.694	2.84103	0.00094236	1	chip1_peak_6396	chr5_151186000_151186200	chr5	151186000	151186200	243362	Stard13
1236	chr16	17654900	17655100	200	139.708	2.84131	0.000284969	1	chip1_peak_1794	chr16_17654900_17655100	chr16	17654900	17655100	94112	Med15
3279	chr6	83417200	83417400	200	139.721	2.84157	0.000757871	1	chip1_peak_5003	chr6_83417200_83417400	chr6	83417200	83417400	194388	Tet3
3877	chr2	118862600	118862800	200	139.741	2.84198	0.000890907	1	chip1_peak_5973	chr2_118862600_118862800	chr2	118862600	118862800	56357	Ivd
3927	chr2	32342400	32342600	200	139.769	2.84256	0.000900928	1	chip1_peak_6056	chr2_32342400_32342600	chr2	32342400	32342600	13429	Dnm1
426	chr8	93125400	93125800	400	139.868	2.84456	8.67e-05	1	chip1_peak_607	chr8_93125400_93125800	chr8	93125400	93125800	13884	Ces1c
2802	chr15	82159400	82159600	200	139.984	2.84692	0.000651158	1	chip1_peak_4245	chr15_82159400_82159600	chr15	82159400	82159600	20788	Srebf2
2980	chr17	28461800	28462000	200	140.07	2.84868	0.000693017	1	chip1_peak_4527	chr17_28461800_28462000	chr17	28461800	28462000	14229	Fkbp5
1836	chr13	24396900	24397100	200	140.072	2.84871	0.000425184	1	chip1_peak_2712	chr13_24396900_24397100	chr13	24396900	24397100	12763	Cmah
1511	chr4	117936700	117936900	200	140.097	2.84922	0.000349199	1	chip1_peak_2212	chr4_117936700_117936900	chr4	117936700	117936900	20441	St3gal3
596	chrX	169906200	169906400	200	140.115	2.84958	0.000132659	1	chip1_peak_859	chrX_169906200_169906400	chrX	169906200	169906400	268395	Mpg
2585	chr2	30291700	30291900	200	140.129	2.84988	0.000601566	1	chip1_peak_3908	chr2_30291700_30291900	chr2	30291700	30291900	227699	Nup188
2279	chr3	157897900	157898100	200	140.174	2.8508	0.000530759	1	chip1_peak_3403	chr3_157897900_157898100	chr3	157897900	157898100	107869	Cth
3160	chr17	24354400	24354600	200	140.198	2.85128	0.000732613	1	chip1_peak_4816	chr17_24354400_24354600	chr17	24354400	24354600	27410	Abca3
2282	chr14	60691200	60691400	200	140.202	2.85135	0.000531009	1	chip1_peak_3408	chr14_60691200_60691400	chr14	60691200	60691400	219140	Spata13
4307	chr19	40404100	40404300	200	140.257	2.85247	0.000982652	1	chip1_peak_6691	chr19_40404100_40404300	chr19	40404100	40404300	20411	Sorbs1
1669	chr6	94614500	94614700	200	140.354	2.85445	0.00038769	1	chip1_peak_2444	chr6_94614500_94614700	chr6	94614500	94614700	16206	Lrig1
746	chr5	107859500	107859800	300	140.442	2.85624	0.000171169	1	chip1_peak_1078	chr5_107859500_107859800	chr5	107859500	107859800	14020	Evi5
4105	chr19	43508600	43508800	200	140.453	2.85646	0.000937088	1	chip1_peak_6358	chr19_43508600_43508800	chr19	43508600	43508800	14718	Got1
382	chr11	116213900	116214200	300	140.456	2.85652	7.95e-05	1	chip1_peak_547	chr11_116213900_116214200	chr11	116213900	116214200	69535	Ten1
3427	chr16	8531800	8532000	200	140.5	2.85741	0.000787842	1	chip1_peak_5237	chr16_8531800_8532000	chr16	8531800	8532000	268860	Abat
1546	chr16	33918000	33918200	200	140.523	2.85789	0.00035705	1	chip1_peak_2259	chr16_33918000_33918200	chr16	33918000	33918200	16419	Itgb5
4265	chr19	29468600	29468800	200	140.685	2.86119	0.000974725	1	chip1_peak_6632	chr19_29468600_29468800	chr19	29468600	29468800	58205	Pdcd1lg2
4136	chr6	148142200	148142400	200	140.74	2.86231	0.000943551	1	chip1_peak_6407	chr6_148142200_148142400	chr6	148142200	148142400	330450	Far2
3837	chr11	115669900	115670100	200	140.825	2.86403	0.000883403	1	chip1_peak_5913	chr11_115669900_115670100	chr11	115669900	115670100	14784	Grb2
1396	chr8	41079500	41079700	200	140.827	2.86407	0.000323397	1	chip1_peak_2033	chr8_41079500_41079700	chr8	41079500	41079700	102103	Mtus1
3157	chr12	87441200	87441400	200	140.915	2.86587	0.000732358	1	chip1_peak_4812	chr12_87441200_87441400	chr12	87441200	87441400	211064	Alkbh1
3771	chr6	97479800	97480000	200	140.99	2.86739	0.000868578	1	chip1_peak_5809	chr6_97479800_97480000	chr6	97479800	97480000	232288	Frmd4b
115	chr11	49085500	49085700	200	140.991	2.86742	1.6e-05	0.779237	chip1_peak_172	chr11_49085500_49085700	chr11	49085500	49085700	15953	Ifi47
116	chr11	49085500	49085700	200	140.991	2.86742	1.6e-05	0.779237	chip1_peak_172	chr11_49085500_49085700	chr11	49085500	49085700	18356	Olfr56
1566	chr2	34823800	34824000	200	141.068	2.86897	0.000361308	1	chip1_peak_2282	chr2_34823800_34824000	chr2	34823800	34824000	30050	Fbxw2
570	chr7	84145000	84145200	200	141.081	2.86923	0.000125561	1	chip1_peak_823	chr7_84145000_84145200	chr7	84145000	84145200	70178	Abhd17c
3650	chr13	100808200	100808400	200	141.139	2.87041	0.000841261	1	chip1_peak_5613	chr13_100808200_100808400	chr13	100808200	100808400	69048	Slc30a5
3482	chr7	130602800	130603000	200	141.178	2.87122	0.000799296	1	chip1_peak_5328	chr7_130602800_130603000	chr7	130602800	130603000	57752	Tacc2
2687	chr14	64330600	64330800	200	141.205	2.87176	0.000624322	1	chip1_peak_4066	chr14_64330600_64330800	chr14	64330600	64330800	110265	Msra
2493	chr9	75877200	75877400	200	141.21	2.87186	0.000585312	1	chip1_peak_3775	chr9_75877200_75877400	chr9	75877200	75877400	12160	Bmp5
2496	chr6	71735500	71735700	200	141.246	2.87259	0.000585629	1	chip1_peak_3779	chr6_71735500_71735700	chr6	71735500	71735700	52250	Reep1
3678	chr2	59800000	59800200	200	141.378	2.87527	0.00084741	1	chip1_peak_5658	chr2_59800000_59800200	chr2	59800000	59800200	66860	Tanc1
913	chr11	101572400	101572600	200	141.421	2.87615	0.000205857	1	chip1_peak_1307	chr11_101572400_101572600	chr11	101572400	101572600	17966	Nbr1
2151	chr2	134539500	134539700	200	141.457	2.87688	0.000503721	1	chip1_peak_3213	chr2_134539500_134539700	chr2	134539500	134539700	15112	Hao1
3890	chr11	84214600	84214800	200	141.471	2.87717	0.000894025	1	chip1_peak_5996	chr11_84214600_84214800	chr11	84214600	84214800	107476	Acaca
4186	chr3	52344400	52344600	200	141.492	2.87759	0.000955536	1	chip1_peak_6487	chr3_52344400_52344600	chr3	52344400	52344600	56458	Foxo1
1988	chr12	104800400	104800600	200	141.554	2.87885	0.000465175	1	chip1_peak_2955	chr12_104800400_104800600	chr12	104800400	104800600	94040	Clmn
574	chr3	129570400	129570600	200	141.582	2.87942	0.000126235	1	chip1_peak_828	chr3_129570400_129570600	chr3	129570400	129570600	170439	Elovl6
2822	chr17	37050300	37050500	200	141.63	2.8804	0.000656856	1	chip1_peak_4279	chr17_37050300_37050500	chr17	37050300	37050500	54393	Gabbr1
2117	chr1	78673800	78674000	200	141.657	2.88094	0.000494946	1	chip1_peak_3158	chr1_78673800_78674000	chr1	78673800	78674000	74205	Acsl3
1344	chr2	51135100	51135400	300	141.69	2.88162	0.00031305	1	chip1_peak_1961	chr2_51135100_51135400	chr2	51135100	51135400	74194	Rnd3
2257	chr3	116972700	116972900	200	141.705	2.88192	0.00052565	1	chip1_peak_3369	chr3_116972700_116972900	chr3	116972700	116972900	74654	4930455H04Rik
3789	chr8	12771800	12772000	200	141.708	2.88199	0.000874039	1	chip1_peak_5841	chr8_12771800_12772000	chr8	12771800	12772000	50770	Atp11a
2537	chr16	17296800	17297000	200	141.723	2.8823	0.000592015	1	chip1_peak_3839	chr16_17296800_17297000	chr16	17296800	17297000	224020	Pi4ka
2682	chr4	59655400	59655600	200	141.796	2.88377	0.000623333	1	chip1_peak_4060	chr4_59655400_59655600	chr4	59655400	59655600	230259	E130308A19Rik
489	chr6	48895200	48895400	200	141.807	2.884	0.000100472	1	chip1_peak_693	chr6_48895200_48895400	chr6	48895200	48895400	76507	Aoc1
3510	chr1	136119100	136119300	200	141.912	2.88613	0.000805641	1	chip1_peak_5372	chr1_136119100_136119300	chr1	136119100	136119300	12292	Cacna1s
2102	chr12	104007300	104007600	300	141.921	2.88631	0.000491722	1	chip1_peak_3132	chr12_104007300_104007600	chr12	104007300	104007600	71907	Serpina9
4329	chr5	72845800	72846000	200	141.948	2.88686	0.00098734	1	chip1_peak_6731	chr5_72845800_72846000	chr5	72845800	72846000	21682	Tec
1088	chr13	94177100	94177400	300	142.103	2.89002	0.000246109	1	chip1_peak_1568	chr13_94177100_94177400	chr13	94177100	94177400	218454	Lhfpl2
3545	chr4	135328000	135328200	200	142.104	2.89004	0.000816227	1	chip1_peak_5437	chr4_135328000_135328200	chr4	135328000	135328200	51796	Srrm1
296	chr2	150823100	150823400	300	142.279	2.89361	5.61e-05	1	chip1_peak_421	chr2_150823100_150823400	chr2	150823100	150823400	110078	Pygb
1180	chr7	28595200	28595400	200	142.318	2.89439	0.000268725	1	chip1_peak_1711	chr7_28595200_28595400	chr7	28595200	28595400	70584	Pak4
1287	chr2	167975700	167975900	200	142.395	2.89595	0.000297869	1	chip1_peak_1866	chr2_167975700_167975900	chr2	167975700	167975900	19246	Ptpn1
4113	chr17	28879700	28879900	200	142.45	2.89708	0.000938683	1	chip1_peak_6369	chr17_28879700_28879900	chr17	28879700	28879900	433091	Pnpla1
1731	chr3	35928700	35929000	300	142.465	2.89738	0.000401575	1	chip1_peak_2538	chr3_35928700_35929000	chr3	35928700	35929000	114893	Dcun1d1
2297	chr11	69783500	69783700	200	142.474	2.89757	0.000534683	1	chip1_peak_3431	chr11_69783500_69783700	chr11	69783500	69783700	75580	Zbtb4
1274	chr2	30996400	30996600	200	142.484	2.89778	0.000294316	1	chip1_peak_1848	chr2_30996400_30996600	chr2	30996400	30996600	74270	Usp20
1199	chr16	43359400	43359600	200	142.57	2.89952	0.000272625	1	chip1_peak_1736	chr16_43359400_43359600	chr16	43359400	43359600	56490	Zbtb20
3483	chr2	27356400	27356600	200	142.728	2.90272	0.000799305	1	chip1_peak_5329	chr2_27356400_27356600	chr2	27356400	27356600	22325	Vav2
1031	chr19	40493000	40493300	300	142.795	2.90409	0.00023119	1	chip1_peak_1480	chr19_40493000_40493300	chr19	40493000	40493300	20411	Sorbs1
1608	chr13	24371800	24372000	200	142.928	2.9068	0.000370296	1	chip1_peak_2344	chr13_24371800_24372000	chr13	24371800	24372000	12763	Cmah
3209	chr8	127356600	127356800	200	142.933	2.9069	0.000743828	1	chip1_peak_4892	chr8_127356600_127356800	chr8	127356600	127356800	93742	Pard3
76	chr3	89750700	89751000	300	143.038	2.90903	6.92e-06	0.512592	chip1_peak_111	chr3_89750700_89751000	chr3	89750700	89751000	56417	Adar
1332	chr1	131183800	131184000	200	143.131	2.91092	0.000310457	1	chip1_peak_1937	chr1_131183800_131184000	chr1	131183800	131184000	54354	Rassf5
3590	chr7	110566500	110566700	200	143.312	2.9146	0.00082647	1	chip1_peak_5509	chr7_110566500_110566700	chr7	110566500	110566700	319934	Sbf2
3832	chr14	17768700	17768900	200	143.332	2.91503	0.000881797	1	chip1_peak_5905	chr14_17768700_17768900	chr14	17768700	17768900	21834	Thrb
223	chr7	143314400	143314600	200	143.391	2.91622	3.99e-05	1	chip1_peak_317	chr7_143314400_143314600	chr7	143314400	143314600	16535	Kcnq1
1041	chr16	10969600	10969800	200	143.419	2.91678	0.000233722	1	chip1_peak_1496	chr16_10969600_10969800	chr16	10969600	10969800	56722	Litaf
2925	chr11	119502000	119502200	200	143.44	2.91721	0.000677055	1	chip1_peak_4431	chr11_119502000_119502200	chr11	119502000	119502200	338371	Endov
3040	chr12	85330900	85331100	200	143.448	2.91738	0.00070558	1	chip1_peak_4616	chr12_85330900_85331100	chr12	85330900	85331100	217718	Nek9
1903	chr13	29773500	29773700	200	143.538	2.91921	0.000447364	1	chip1_peak_2831	chr13_29773500_29773700	chr13	29773500	29773700	68916	Cdkal1
1791	chr1	134594500	134594700	200	143.56	2.91966	0.00041348	1	chip1_peak_2627	chr1_134594500_134594700	chr1	134594500	134594700	75605	Kdm5b
3574	chr11	100746500	100746800	300	143.592	2.92029	0.000823825	1	chip1_peak_5484	chr11_100746500_100746800	chr11	100746500	100746800	380728	Kcnh4
698	chr5	34559300	34559500	200	143.647	2.92142	0.000159314	1	chip1_peak_1005	chr5_34559300_34559500	chr5	34559300	34559500	24055	Sh3bp2
3015	chr7	130683400	130683600	200	143.65	2.92149	0.000701502	1	chip1_peak_4579	chr7_130683400_130683600	chr7	130683400	130683600	57752	Tacc2
2470	chr3	130181300	130181500	200	143.695	2.9224	0.000577647	1	chip1_peak_3725	chr3_130181300_130181500	chr3	130181300	130181500	77018	Col25a1
3241	chr17	83837300	83837500	200	143.699	2.92247	0.000749603	1	chip1_peak_4943	chr17_83837300_83837500	chr17	83837300	83837500	107766	Haao
2136	chr6	54080400	54080600	200	143.726	2.92302	0.000500724	1	chip1_peak_3187	chr6_54080400_54080600	chr6	54080400	54080600	69993	Chn2
2016	chr1	133417200	133417400	200	143.734	2.92319	0.000469885	1	chip1_peak_2998	chr1_133417200_133417400	chr1	133417200	133417400	20668	Sox13
694	chr1	38243300	38243500	200	143.748	2.92348	0.00015768	1	chip1_peak_999	chr1_38243300_38243500	chr1	38243300	38243500	16764	Aff3
1778	chr10	25522300	25522500	200	143.783	2.92418	0.000411195	1	chip1_peak_2607	chr10_25522300_25522500	chr10	25522300	25522500	13822	Epb4.1l2
2986	chr16	32859400	32859600	200	143.866	2.92588	0.000694629	1	chip1_peak_4534	chr16_32859400_32859600	chr16	32859400	32859600	100502698	1700021K19Rik
3637	chr13	114089600	114089800	200	143.891	2.92639	0.000837726	1	chip1_peak_5587	chr13_114089600_114089800	chr13	114089600	114089800	218639	Arl15
3581	chr12	75460400	75460600	200	143.903	2.92664	0.000824821	1	chip1_peak_5494	chr12_75460400_75460600	chr12	75460400	75460600	26932	Ppp2r5e
1414	chr5	121943800	121944000	200	144.039	2.92939	0.000326154	1	chip1_peak_2060	chr5_121943800_121944000	chr5	121943800	121944000	13048	Cux2
1904	chr8	105011500	105011700	200	144.04	2.92941	0.000447406	1	chip1_peak_2832	chr8_105011500_105011700	chr8	105011500	105011700	436059	Ces2h
3346	chr2	31722700	31722900	200	144.066	2.92994	0.000772604	1	chip1_peak_5109	chr2_31722700_31722900	chr2	31722700	31722900	11350	Abl1
319	chr11	117967700	117967900	200	144.076	2.93014	6.22e-05	1	chip1_peak_454	chr11_117967700_117967900	chr11	117967700	117967900	12702	Socs3
3376	chr12	70983600	70983900	300	144.241	2.9335	0.0007783	1	chip1_peak_5155	chr12_70983600_70983900	chr12	70983600	70983900	19167	Psma3
1231	chr2	90903100	90903300	200	144.259	2.93387	0.000283939	1	chip1_peak_1788	chr2_90903100_90903300	chr2	90903100	90903300	68349	Ndufs3
2324	chr7	48874700	48874900	200	144.265	2.93399	0.000539319	1	chip1_peak_3466	chr7_48874700_48874900	chr7	48874700	48874900	108961	E2f8
2846	chr6	71967900	71968100	200	144.375	2.93622	0.000661196	1	chip1_peak_4308	chr6_71967900_71968100	chr6	71967900	71968100	20019	Polr1a
1225	chr16	97837600	97837800	200	144.421	2.93716	0.000281688	1	chip1_peak_1778	chr16_97837600_97837800	chr16	97837600	97837800	114604	Prdm15
2916	chr5	125146100	125146300	200	144.424	2.93723	0.000676148	1	chip1_peak_4417	chr5_125146100_125146300	chr5	125146100	125146300	20602	Ncor2
3256	chr17	78333800	78334000	200	144.431	2.93737	0.000753095	1	chip1_peak_4968	chr17_78333800_78334000	chr17	78333800	78334000	50766	Crim1
4345	chr16	43275000	43275200	200	144.48	2.93836	0.000992132	1	chip1_peak_6764	chr16_43275000_43275200	chr16	43275000	43275200	56490	Zbtb20
2290	chr11	70604200	70604400	200	144.487	2.9385	0.000533042	1	chip1_peak_3421	chr11_70604200_70604400	chr11	70604200	70604400	50932	Mink1
543	chr14	70319900	70320200	300	144.492	2.9386	0.000116475	1	chip1_peak_778	chr14_70319900_70320200	chr14	70319900	70320200	213053	Slc39a14
3061	chr19	42595300	42595500	200	144.556	2.9399	0.000710266	1	chip1_peak_4655	chr19_42595300_42595500	chr19	42595300	42595500	67573	Loxl4
2494	chr1	136893800	136894000	200	144.562	2.94003	0.000585409	1	chip1_peak_3776	chr1_136893800_136894000	chr1	136893800	136894000	26424	Nr5a2
1639	chr8	41085300	41085500	200	144.679	2.94241	0.000379714	1	chip1_peak_2398	chr8_41085300_41085500	chr8	41085300	41085500	102103	Mtus1
615	chr10	80358800	80359100	300	144.751	2.94388	0.000136193	1	chip1_peak_885	chr10_80358800_80359100	chr10	80358800	80359100	100568459	Bc1
616	chr10	80358800	80359100	300	144.751	2.94388	0.000136193	1	chip1_peak_885	chr10_80358800_80359100	chr10	80358800	80359100	216166	Plk5
3164	chr7	130644200	130644400	200	144.772	2.94431	0.00073286	1	chip1_peak_4823	chr7_130644200_130644400	chr7	130644200	130644400	57752	Tacc2
1279	chr12	84146900	84147100	200	144.88	2.94649	0.000295062	1	chip1_peak_1854	chr12_84146900_84147100	chr12	84146900	84147100	70481	Pnma1
1483	chr11	54844500	54844700	200	144.902	2.94695	0.000343013	1	chip1_peak_2164	chr11_54844500_54844700	chr11	54844500	54844700	75530	Lyrm7
2674	chr5	124159300	124159500	200	144.907	2.94705	0.000622376	1	chip1_peak_4049	chr5_124159300_124159500	chr5	124159300	124159500	19679	Pitpnm2
1601	chr16	25804300	25804500	200	144.929	2.94749	0.000368692	1	chip1_peak_2332	chr16_25804300_25804500	chr16	25804300	25804500	22061	Trp63
2628	chr14	121313800	121314000	200	145.244	2.95391	0.000611372	1	chip1_peak_3971	chr14_121313800_121314000	chr14	121313800	121314000	223255	Stk24
1007	chr14	63176500	63176900	400	145.248	2.95397	0.000225351	1	chip1_peak_1441	chr14_63176500_63176900	chr14	63176500	63176900	14137	Fdft1
1548	chr9	108391800	108392000	200	145.286	2.95476	0.000357148	1	chip1_peak_2261	chr9_108391800_108392000	chr9	108391800	108392000	22258	Usp4
33	chr4	6266100	6266800	700	145.308	2.9552	1.21e-06	0.203928	chip1_peak_41	chr4_6266100_6266800	chr4	6266100	6266800	13122	Cyp7a1
1615	chr8	120742100	120742300	200	145.309	2.95522	0.000372457	1	chip1_peak_2354	chr8_120742100_120742300	chr8	120742100	120742300	15900	Irf8
3900	chr11	23680600	23680800	200	145.313	2.9553	0.000895445	1	chip1_peak_6008	chr11_23680600_23680800	chr11	23680600	23680800	74467	Pus10
2991	chr6	54080700	54080900	200	145.315	2.95534	0.000696651	1	chip1_peak_4545	chr6_54080700_54080900	chr6	54080700	54080900	69993	Chn2
4275	chr8	75037800	75038000	200	145.344	2.95594	0.000976797	1	chip1_peak_6647	chr8_75037800_75038000	chr8	75037800	75038000	21968	Tom1
1293	chr9	66507800	66508000	200	145.357	2.95619	0.000300095	1	chip1_peak_1875	chr9_66507800_66508000	chr9	66507800	66508000	235439	Herc1
3215	chr9	9205600	9205800	200	145.386	2.9568	0.000744406	1	chip1_peak_4901	chr9_9205600_9205800	chr9	9205600	9205800	71544	Arhgap42
3901	chr2	27062300	27062500	200	145.388	2.95682	0.000895788	1	chip1_peak_6009	chr2_27062300_27062500	chr2	27062300	27062500	66139	Tmem8c
1366	chr18	44538100	44538300	200	145.434	2.95776	0.000316287	1	chip1_peak_1987	chr18_44538100_44538300	chr18	44538100	44538300	328949	Mcc
2747	chr2	59218100	59218300	200	145.512	2.95934	0.000638099	1	chip1_peak_4160	chr2_59218100_59218300	chr2	59218100	59218300	227937	Pkp4
3470	chr8	95127900	95128100	200	145.581	2.96076	0.000796525	1	chip1_peak_5307	chr8_95127900_95128100	chr8	95127900	95128100	16582	Kifc3
1498	chr4	106937800	106938000	200	145.594	2.96101	0.000345792	1	chip1_peak_2185	chr4_106937800_106938000	chr4	106937800	106938000	72475	Ssbp3
4236	chr10	127456600	127456800	200	145.61	2.96135	0.000968265	1	chip1_peak_6583	chr10_127456600_127456800	chr10	127456600	127456800	71750	R3hdm2
1863	chr5	135180200	135180400	200	145.688	2.96293	0.000435216	1	chip1_peak_2761	chr5_135180200_135180400	chr5	135180200	135180400	12054	Bcl7b
424	chr1	40283500	40283700	200	145.75	2.96419	8.59e-05	1	chip1_peak_604	chr1_40283500_40283700	chr1	40283500	40283700	16177	Il1r1
396	chr11	62355700	62355900	200	145.758	2.96435	8.14e-05	1	chip1_peak_563	chr11_62355700_62355900	chr11	62355700	62355900	20185	Ncor1
2719	chr3	108368500	108368700	200	145.776	2.96472	0.000631095	1	chip1_peak_4119	chr3_108368500_108368700	chr3	108368500	108368700	68753	Mybphl
1389	chr17	34909000	34909200	200	145.78	2.9648	0.000321624	1	chip1_peak_2023	chr17_34909000_34909200	chr17	34909000	34909200	110147	Ehmt2
4107	chr13	95728000	95728200	200	145.789	2.96498	0.000937629	1	chip1_peak_6361	chr13_95728000_95728200	chr13	95728000	95728200	544963	Iqgap2
1380	chr18	33801800	33802000	200	145.81	2.96542	0.000319568	1	chip1_peak_2011	chr18_33801800_33802000	chr18	33801800	33802000	13824	Epb4.1l4a
4050	chr11	77094400	77094600	200	145.928	2.96782	0.000927795	1	chip1_peak_6272	chr11_77094400_77094600	chr11	77094400	77094600	319634	Efcab5
1805	chr8	90934200	90934400	200	145.982	2.9689	0.000416751	1	chip1_peak_2655	chr8_90934200_90934400	chr8	90934200	90934400	109151	Chd9
1450	chr5	112334000	112334200	200	146.01	2.96949	0.00033484	1	chip1_peak_2113	chr5_112334000_112334200	chr5	112334000	112334200	54723	Tfip11
1532	chr16	34001200	34001500	300	146.022	2.96973	0.000354687	1	chip1_peak_2241	chr16_34001200_34001500	chr16	34001200	34001500	545156	Kalrn
1922	chr15	80091800	80092100	300	146.031	2.9699	0.000450187	1	chip1_peak_2855	chr15_80091800_80092100	chr15	80091800	80092100	20972	Syngr1
3999	chr14	121337700	121337900	200	146.068	2.97066	0.000918064	1	chip1_peak_6189	chr14_121337700_121337900	chr14	121337700	121337900	223255	Stk24
4299	chr18	57364200	57364400	200	146.154	2.97242	0.000981227	1	chip1_peak_6681	chr18_57364200_57364400	chr18	57364200	57364400	73137	Prrc1
308	chr18	75468100	75468500	400	146.166	2.97266	5.91e-05	1	chip1_peak_438	chr18_75468100_75468500	chr18	75468100	75468500	269037	Ctif
4237	chr16	18623300	18623500	200	146.229	2.97392	0.000968557	1	chip1_peak_6584	chr16_18623300_18623500	chr16	18623300	18623500	18951	2023-09-05
2997	chr9	106707900	106708100	200	146.236	2.97407	0.000698677	1	chip1_peak_4556	chr9_106707900_106708100	chr9	106707900	106708100	81000	Rad54l2
2236	chr15	76603400	76603600	200	146.246	2.97428	0.000521832	1	chip1_peak_3341	chr15_76603400_76603600	chr15	76603400	76603600	94230	Cpsf1
1112	chr7	111075100	111075300	200	146.35	2.97639	0.000251956	1	chip1_peak_1606	chr7_111075100_111075300	chr7	111075100	111075300	13690	Eif4g2
3913	chr13	31958300	31958500	200	146.394	2.97728	0.000899097	1	chip1_peak_6032	chr13_31958300_31958500	chr13	31958300	31958500	218138	Gmds
2238	chr5	123080900	123081200	300	146.404	2.97749	0.000522078	1	chip1_peak_3343	chr5_123080900_123081200	chr5	123080900	123081200	330189	Tmem120b
2948	chr11	51817500	51817700	200	146.47	2.97884	0.000682582	1	chip1_peak_4469	chr11_51817500_51817700	chr11	51817500	51817700	76901	Jade2
2813	chr1	91423700	91423900	200	146.473	2.9789	0.000653351	1	chip1_peak_4258	chr1_91423700_91423900	chr1	91423700	91423900	18627	Per2
434	chr18	67961500	67961700	200	146.644	2.98238	8.91e-05	1	chip1_peak_623	chr18_67961500_67961700	chr18	67961500	67961700	52662	Ldlrad4
2180	chr19	46536300	46536500	200	146.647	2.98244	0.000509236	1	chip1_peak_3253	chr19_46536300_46536500	chr19	46536300	46536500	56350	Arl3
488	chr12	80943500	80944000	500	146.663	2.98276	0.000100356	1	chip1_peak_691	chr12_80943500_80944000	chr12	80943500	80944000	100504661	Gm20337
2720	chr11	121365000	121365200	200	146.688	2.98328	0.000631196	1	chip1_peak_4121	chr11_121365000_121365200	chr11	121365000	121365200	217371	Rab40b
2680	chr7	101421700	101421900	200	146.757	2.98466	0.000623089	1	chip1_peak_4058	chr7_101421700_101421900	chr7	101421700	101421900	207728	Pde2a
3659	chr14	121141600	121141900	300	146.763	2.98479	0.000842144	1	chip1_peak_5624	chr14_121141600_121141900	chr14	121141600	121141900	223254	Farp1
2149	chr11	97814700	97814900	200	146.764	2.98482	0.000503344	1	chip1_peak_3210	chr11_97814700_97814900	chr11	97814700	97814900	16796	Lasp1
4123	chr2	160775700	160775900	200	146.768	2.9849	0.000940859	1	chip1_peak_6385	chr2_160775700_160775900	chr2	160775700	160775900	18803	Plcg1
4124	chr2	160775700	160775900	200	146.768	2.9849	0.000940859	1	chip1_peak_6385	chr2_160775700_160775900	chr2	160775700	160775900	320799	Zhx3
686	chr15	10654400	10654700	300	146.775	2.98505	0.00015648	1	chip1_peak_987	chr15_10654400_10654700	chr15	10654400	10654700	75646	Rai14
884	chr11	120284100	120284300	200	146.81	2.98575	0.000199491	1	chip1_peak_1261	chr11_120284100_120284300	chr11	120284100	120284300	268515	Bahcc1
2145	chr9	107948200	107948400	200	146.844	2.98644	0.000502562	1	chip1_peak_3203	chr9_107948200_107948400	chr9	107948200	107948400	235604	Camkv
2847	chr12	80178300	80178500	200	146.881	2.9872	0.000661441	1	chip1_peak_4310	chr12_80178300_80178500	chr12	80178300	80178500	109711	Actn1
4377	chr8	123970900	123971100	200	146.903	2.98764	0.000999088	1	chip1_peak_6819	chr8_123970900_123971100	chr8	123970900	123971100	56199	Abcb10
301	chr14	7820300	7820500	200	146.942	2.98843	5.75e-05	1	chip1_peak_427	chr14_7820300_7820500	chr14	7820300	7820500	286940	Flnb
4333	chr6	29441800	29442000	200	147.047	2.99056	0.000988585	1	chip1_peak_6737	chr6_29441800_29442000	chr6	29441800	29442000	68794	Flnc
4014	chr5	19504500	19504700	200	147.051	2.99066	0.000921201	1	chip1_peak_6216	chr5_19504500_19504700	chr5	19504500	19504700	50791	Magi2
1442	chr2	130963300	130963500	200	147.058	2.99079	0.000333287	1	chip1_peak_2101	chr2_130963300_130963500	chr2	130963300	130963500	11990	Atrn
1644	chr7	81254800	81255000	200	147.064	2.99092	0.000381044	1	chip1_peak_2406	chr7_81254800_81255000	chr7	81254800	81255000	18584	Pde8a
3975	chr9	64596000	64596200	200	147.067	2.99098	0.000913202	1	chip1_peak_6151	chr9_64596000_64596200	chr9	64596000	64596200	214058	Megf11
784	chr11	70525700	70525900	200	147.072	2.99109	0.000177446	1	chip1_peak_1121	chr11_70525700_70525900	chr11	70525700	70525900	19175	Psmb6
2246	chr17	73821000	73821200	200	147.145	2.99256	0.000523298	1	chip1_peak_3355	chr17_73821000_73821200	chr17	73821000	73821200	57440	Ehd3
2084	chr9	108225600	108225800	200	147.148	2.99262	0.0004879	1	chip1_peak_3105	chr9_108225600_108225800	chr9	108225600	108225800	13138	Dag1
4243	chr9	65649800	65650000	200	147.206	2.9938	0.000969692	1	chip1_peak_6593	chr9_65649800_65650000	chr9	65649800	65650000	71973	Rbpms2
3391	chr3	153690100	153690300	200	147.212	2.99393	0.000780165	1	chip1_peak_5174	chr3_153690100_153690300	chr3	153690100	153690300	20447	St6galnac3
249	chr7	105809700	105809900	200	147.234	2.99438	4.62e-05	1	chip1_peak_353	chr7_105809700_105809900	chr7	105809700	105809900	27397	Mrpl17
4220	chr6	55348100	55348300	200	147.243	2.99455	0.000963408	1	chip1_peak_6550	chr6_55348100_55348300	chr6	55348100	55348300	11826	Aqp1
4370	chr14	67781500	67781700	200	147.281	2.99534	0.0009968	1	chip1_peak_6805	chr14_67781500_67781700	chr14	67781500	67781700	68813	Dock5
4100	chr9	21034700	21034900	200	147.383	2.99739	0.00093623	1	chip1_peak_6353	chr9_21034700_21034900	chr9	21034700	21034900	15898	Icam5
4179	chr5	134521600	134521800	200	147.386	2.99746	0.000953281	1	chip1_peak_6478	chr5_134521600_134521800	chr5	134521600	134521800	269713	Clip2
1569	chr17	80056800	80057000	200	147.411	2.99797	0.000361728	1	chip1_peak_2285	chr17_80056800_80057000	chr17	80056800	80057000	72692	Hnrnpll
50	chr1	140163400	140163700	300	147.415	2.99806	2.75e-06	0.319881	chip1_peak_69	chr1_140163400_140163700	chr1	140163400	140163700	12628	Cfh
4214	chr8	4267000	4267200	200	147.419	2.99814	0.000961837	1	chip1_peak_6541	chr8_4267000_4267200	chr8	4267000	4267200	21856	Timm44
3172	chr12	85619900	85620100	200	147.425	2.99825	0.000734827	1	chip1_peak_4836	chr12_85619900_85620100	chr12	85619900	85620100	81703	Jdp2
705	chr6	57529100	57529300	200	147.459	2.99896	0.000160697	1	chip1_peak_1017	chr6_57529100_57529300	chr6	57529100	57529300	243382	Ppm1k
3841	chr4	106960600	106960800	200	147.499	2.99977	0.000884227	1	chip1_peak_5917	chr4_106960600_106960800	chr4	106960600	106960800	72475	Ssbp3
1949	chr16	76344400	76344700	300	147.574	3.00129	0.00045522	1	chip1_peak_2893	chr16_76344400_76344700	chr16	76344400	76344700	268903	Nrip1
2469	chr15	53281500	53281700	200	147.708	3.00401	0.000577435	1	chip1_peak_3724	chr15_53281500_53281700	chr15	53281500	53281700	14042	Ext1
4080	chr17	78415000	78415200	200	147.721	3.00429	0.000933538	1	chip1_peak_6323	chr17_78415000_78415200	chr17	78415000	78415200	225020	Fez2
1655	chr11	20208100	20208300	200	147.728	3.00443	0.000384544	1	chip1_peak_2421	chr11_20208100_20208300	chr11	20208100	20208300	58809	Rnase4
626	chr4	106450800	106451100	300	147.741	3.00469	0.000138068	1	chip1_peak_897	chr4_106450800_106451100	chr4	106450800	106451100	100102	Pcsk9
524	chr8	127124100	127124400	300	147.771	3.00529	0.000108156	1	chip1_peak_741	chr8_127124100_127124400	chr8	127124100	127124400	93742	Pard3
3195	chr7	119561800	119562000	200	147.829	3.00648	0.000740236	1	chip1_peak_4871	chr7_119561800_119562000	chr7	119561800	119562000	233799	Acsm2
1025	chr7	25422300	25422600	300	147.856	3.00703	0.000229784	1	chip1_peak_1471	chr7_25422300_25422600	chr7	25422300	25422600	654804	4732471J01Rik
3405	chr7	116361600	116361900	300	147.898	3.00787	0.000782138	1	chip1_peak_5197	chr7_116361600_116361900	chr7	116361600	116361900	18704	Pik3c2a
1956	chr4	41145500	41145700	200	147.931	3.00856	0.000457256	1	chip1_peak_2903	chr4_41145500_41145700	chr4	41145500	41145700	67615	Ube2r2
4043	chr5	124885000	124885200	200	147.935	3.00864	0.000925971	1	chip1_peak_6259	chr5_124885000_124885200	chr5	124885000	124885200	269704	Zfp664
1386	chr2	33459000	33459300	300	147.945	3.00884	0.000321068	1	chip1_peak_2018	chr2_33459000_33459300	chr2	33459000	33459300	71834	Zbtb43
4293	chrX	157487000	157487200	200	148.023	3.01043	0.000980603	1	chip1_peak_6673	chrX_157487000_157487200	chrX	157487000	157487200	20603	Sms
3429	chr6	95656000	95656200	200	148.035	3.01067	0.000788245	1	chip1_peak_5239	chr6_95656000_95656200	chr6	95656000	95656200	20917	Suclg2
3958	chr19	8950900	8951100	200	148.052	3.01101	0.000907573	1	chip1_peak_6114	chr19_8950900_8951100	chr19	8950900	8951100	23942	Mta2
71	chr2	57148200	57148700	500	148.115	3.01228	6.28e-06	0.500143	chip1_peak_103	chr2_57148200_57148700	chr2	57148200	57148700	767815	BB557941
3613	chr14	103072300	103072500	200	148.135	3.01269	0.000832433	1	chip1_peak_5553	chr14_103072300_103072500	chr14	103072300	103072500	211286	Cln5
2586	chr11	103333600	103333800	200	148.176	3.01354	0.000601633	1	chip1_peak_3909	chr11_103333600_103333800	chr11	103333600	103333800	544817	Arhgap27
3668	chr16	46411800	46412000	200	148.219	3.01441	0.000844392	1	chip1_peak_5640	chr16_46411800_46412000	chr16	46411800	46412000	58998	Pvrl3
1528	chr4	57277100	57277300	200	148.222	3.01446	0.000353423	1	chip1_peak_2235	chr4_57277100_57277300	chr4	57277100	57277300	545622	Ptpn3
2104	chr11	117349100	117349300	200	148.259	3.01522	0.000492429	1	chip1_peak_3135	chr11_117349100_117349300	chr11	117349100	117349300	53860	2023-09-09
4301	chr13	58187900	58188100	200	148.263	3.0153	0.00098167	1	chip1_peak_6684	chr13_58187900_58188100	chr13	58187900	58188100	56085	Ubqln1
3922	chr13	34321300	34321500	200	148.266	3.01537	0.000900214	1	chip1_peak_6047	chr13_34321300_34321500	chr13	34321300	34321500	73102	Slc22a23
1351	chr4	40193500	40193700	200	148.311	3.01627	0.000314116	1	chip1_peak_1969	chr4_40193500_40193700	chr4	40193500	40193700	11428	Aco1
3136	chr10	117840900	117841100	200	148.348	3.01704	0.000729832	1	chip1_peak_4786	chr10_117840900_117841100	chr10	117840900	117841100	215449	Rap1b
4181	chr11	71010300	71010500	200	148.401	3.0181	0.000954043	1	chip1_peak_6480	chr11_71010300_71010500	chr11	71010300	71010500	116891	Derl2
783	chr10	94835000	94835400	400	148.517	3.02047	0.000177437	1	chip1_peak_1120	chr10_94835000_94835400	chr10	94835000	94835400	54712	Plxnc1
2131	chr1	40300200	40300400	200	148.599	3.02214	0.00049881	1	chip1_peak_3181	chr1_40300200_40300400	chr1	40300200	40300400	16177	Il1r1
4378	chr15	103245400	103245600	200	148.61	3.02236	0.00099915	1	chip1_peak_6820	chr15_103245400_103245600	chr15	103245400	103245600	15382	Hnrnpa1
879	chr1	171887200	171887400	200	148.659	3.02335	0.000198348	1	chip1_peak_1255	chr1_171887200_171887400	chr1	171887200	171887400	12523	Cd84
555	chr12	104827700	104827900	200	148.664	3.02345	0.000121782	1	chip1_peak_798	chr12_104827700_104827900	chr12	104827700	104827900	94040	Clmn
788	chr8	64725200	64725500	300	148.704	3.02427	0.00017869	1	chip1_peak_1128	chr8_64725200_64725500	chr8	64725200	64725500	66234	Msmo1
3272	chr11	45891400	45891600	200	148.714	3.02448	0.000756196	1	chip1_peak_4990	chr11_45891400_45891600	chr11	45891400	45891600	216705	Clint1
2593	chr13	41805500	41805700	200	148.721	3.02461	0.000603094	1	chip1_peak_3920	chr13_41805500_41805700	chr13	41805500	41805700	109254	Adtrp
968	chr5	135639300	135639500	200	148.785	3.02592	0.000217528	1	chip1_peak_1384	chr5_135639300_135639500	chr5	135639300	135639500	215160	Rhbdd2
150	chr1	36103700	36103900	200	148.804	3.0263	2.26e-05	0.899228	chip1_peak_218	chr1_36103700_36103900	chr1	36103700	36103900	50785	Hs6st1
1104	chr9	64576100	64576300	200	148.809	3.02641	0.000250544	1	chip1_peak_1596	chr9_64576100_64576300	chr9	64576100	64576300	214058	Megf11
3167	chr13	46810300	46810500	200	148.934	3.02894	0.000733637	1	chip1_peak_4829	chr13_46810300_46810500	chr13	46810300	46810500	16553	Kif13a
748	chr16	11631600	11631800	200	148.947	3.0292	0.000171314	1	chip1_peak_1080	chr16_11631600_11631800	chr16	11631600	11631800	74478	Snx29
177	chr16	8707000	8707300	300	148.966	3.0296	2.84e-05	0.98166	chip1_peak_257	chr16_8707000_8707300	chr16	8707000	8707300	252870	Usp7
816	chr11	53802700	53802900	200	148.968	3.02963	0.000184929	1	chip1_peak_1165	chr11_53802700_53802900	chr11	53802700	53802900	622459	Gm12216
3399	chr7	137084100	137084300	200	148.996	3.03022	0.000781595	1	chip1_peak_5187	chr7_137084100_137084300	chr7	137084100	137084300	17314	Mgmt
693	chr19	16285500	16285700	200	149.122	3.03277	0.000157563	1	chip1_peak_997	chr19_16285500_16285700	chr19	16285500	16285700	14682	Gnaq
1755	chr11	60303400	60303600	200	149.202	3.0344	0.000406855	1	chip1_peak_2578	chr11_60303400_60303600	chr11	60303400	60303600	216810	Tom1l2
3117	chr18	35660200	35660400	200	149.256	3.0355	0.000724324	1	chip1_peak_4754	chr18_35660200_35660400	chr18	35660200	35660400	71242	Spata24
1676	chr8	93106600	93106800	200	149.269	3.03575	0.000389331	1	chip1_peak_2455	chr8_93106600_93106800	chr8	93106600	93106800	13884	Ces1c
3624	chr9	70892000	70892200	200	149.298	3.03635	0.00083432	1	chip1_peak_5567	chr9_70892000_70892200	chr9	70892000	70892200	15450	Lipc
1270	chr12	103623800	103624000	200	149.322	3.03685	0.000293358	1	chip1_peak_1840	chr12_103623800_103624000	chr12	103623800	103624000	217847	Serpina10
1810	chr5	24490100	24490300	200	149.34	3.03721	0.00041806	1	chip1_peak_2664	chr5_24490100_24490300	chr5	24490100	24490300	213990	Agap3
958	chr1	65175600	65175800	200	149.368	3.03777	0.000215253	1	chip1_peak_1372	chr1_65175600_65175800	chr1	65175600	65175800	15926	Idh1
4182	chr3	95868200	95868400	200	149.387	3.03815	0.000954491	1	chip1_peak_6482	chr3_95868200_95868400	chr3	95868200	95868400	66292	Mrps21
2360	chr9	52051800	52052100	300	149.46	3.03965	0.000546816	1	chip1_peak_3528	chr9_52051800_52052100	chr9	52051800	52052100	19684	Rdx
2474	chr4	49500400	49500600	200	149.539	3.04124	0.000578469	1	chip1_peak_3731	chr4_49500400_49500600	chr4	49500400	49500600	12012	Baat
149	chr16	35441300	35441600	300	149.571	3.04191	2.24e-05	0.899228	chip1_peak_217	chr16_35441300_35441600	chr16	35441300	35441600	72599	Pdia5
94	chr15	103299300	103299600	300	149.581	3.0421	1.16e-05	0.66726	chip1_peak_144	chr15_103299300_103299600	chr15	103299300	103299600	56447	Copz1
987	chr9	107543600	107543900	300	149.62	3.0429	0.000221543	1	chip1_peak_1412	chr9_107543600_107543900	chr9	107543600	107543900	56032	Nprl2
173	chr11	116445600	116445800	200	149.724	3.04502	2.79e-05	0.978114	chip1_peak_252	chr11_116445600_116445800	chr11	116445600	116445800	217341	Qrich2
768	chr18	65122100	65122300	200	149.732	3.04517	0.000174232	1	chip1_peak_1102	chr18_65122100_65122300	chr18	65122100	65122300	83814	Nedd4l
3162	chr16	34081300	34081500	200	149.772	3.04599	0.000732784	1	chip1_peak_4818	chr16_34081300_34081500	chr16	34081300	34081500	545156	Kalrn
3996	chr12	87101500	87101800	300	149.779	3.04614	0.000917215	1	chip1_peak_6183	chr12_87101500_87101800	chr12	87101500	87101800	64242	Ngb
3467	chr1	39446400	39446600	200	149.783	3.04622	0.000795624	1	chip1_peak_5301	chr1_39446400_39446600	chr1	39446400	39446600	54610	Tbc1d8
1290	chr3	121971100	121971300	200	149.809	3.04674	0.000298469	1	chip1_peak_1869	chr3_121971100_121971300	chr3	121971100	121971300	214137	Arhgap29
2251	chr9	107765400	107765600	200	149.818	3.04692	0.000524372	1	chip1_peak_3362	chr9_107765400_107765600	chr9	107765400	107765600	83486	Rbm5
3418	chr9	100865900	100866100	200	149.836	3.04729	0.000785057	1	chip1_peak_5218	chr9_100865900_100866100	chr9	100865900	100866100	65112	Pmepa1
3925	chr14	69691100	69691300	200	149.871	3.04799	0.000900729	1	chip1_peak_6054	chr14_69691100_69691300	chr14	69691100	69691300	94352	Loxl2
1489	chr10	68270300	68270500	200	149.885	3.04828	0.000343868	1	chip1_peak_2170	chr10_68270300_68270500	chr10	68270300	68270500	71371	Arid5b
1657	chr2	168093900	168094100	200	149.974	3.05009	0.000384597	1	chip1_peak_2423	chr2_168093900_168094100	chr2	168093900	168094100	58220	Pard6b
1915	chr4	155312400	155312600	200	149.994	3.05051	0.000449015	1	chip1_peak_2846	chr4_155312400_155312600	chr4	155312400	155312600	18762	Prkcz
1473	chr13	41777800	41778000	200	150.028	3.05119	0.000339813	1	chip1_peak_2150	chr13_41777800_41778000	chr13	41777800	41778000	109254	Adtrp
286	chr13	94130700	94131000	300	150.062	3.05188	5.37e-05	1	chip1_peak_405	chr13_94130700_94131000	chr13	94130700	94131000	218454	Lhfpl2
675	chr19	59046300	59046500	200	150.127	3.05322	0.000153008	1	chip1_peak_975	chr19_59046300_59046500	chr19	59046300	59046500	71653	4930506M07Rik
2618	chr3	99188200	99188400	200	150.371	3.05817	0.000609344	1	chip1_peak_3959	chr3_99188200_99188400	chr3	99188200	99188400	70560	Wars2
3840	chr1	125935700	125935900	200	150.396	3.05867	0.000884082	1	chip1_peak_5916	chr1_125935700_125935900	chr1	125935700	125935900	210356	Nckap5
635	chr2	167313100	167313300	200	150.411	3.05898	0.000140238	1	chip1_peak_912	chr2_167313100_167313300	chr2	167313100	167313300	56336	B4galt5
572	chr11	120678100	120678300	200	150.476	3.0603	0.000125718	1	chip1_peak_825	chr11_120678100_120678300	chr11	120678100	120678300	68938	Aspscr1
2342	chr6	116274900	116275200	300	150.526	3.06133	0.000542451	1	chip1_peak_3497	chr6_116274900_116275200	chr6	116274900	116275200	67492	Zfand4
2695	chr3	152732900	152733100	200	150.569	3.0622	0.000625421	1	chip1_peak_4078	chr3_152732900_152733100	chr3	152732900	152733100	329777	Pigk
3305	chr15	102092900	102093100	200	150.59	3.06263	0.000761555	1	chip1_peak_5036	chr15_102092900_102093100	chr15	102092900	102093100	75705	Eif4b
2740	chr6	116133800	116134000	200	150.701	3.06489	0.000636033	1	chip1_peak_4149	chr6_116133800_116134000	chr6	116133800	116134000	330401	Tmcc1
204	chr19	16323000	16323400	400	150.703	3.06492	3.58e-05	1	chip1_peak_294	chr19_16323000_16323400	chr19	16323000	16323400	14682	Gnaq
1281	chr7	128705300	128705500	200	150.774	3.06636	0.00029539	1	chip1_peak_1856	chr7_128705300_128705500	chr7	128705300	128705500	210711	Mcmbp
2768	chr11	3211600	3211800	200	150.827	3.06745	0.000643271	1	chip1_peak_4191	chr11_3211600_3211800	chr11	3211600	3211800	74203	Eif4enif1
2749	chr11	69585200	69585400	200	150.86	3.06812	0.000639117	1	chip1_peak_4167	chr11_69585200_69585400	chr11	69585200	69585400	22059	Trp53
3693	chr18	38587000	38587200	200	151.008	3.07113	0.000852831	1	chip1_peak_5690	chr18_38587000_38587200	chr18	38587000	38587200	24066	Spry4
2191	chr7	38013900	38014200	300	151.092	3.07283	0.000511945	1	chip1_peak_3272	chr7_38013900_38014200	chr7	38013900	38014200	19777	Uri1
2668	chr15	77171900	77172200	300	151.191	3.07484	0.000620964	1	chip1_peak_4038	chr15_77171900_77172200	chr15	77171900	77172200	93686	Rbfox2
2454	chr4	107989200	107989400	200	151.213	3.0753	0.000575639	1	chip1_peak_3705	chr4_107989200_107989400	chr4	107989200	107989400	242607	Slc1a7
2020	chr13	24467800	24468000	200	151.22	3.07545	0.000471158	1	chip1_peak_3008	chr13_24467800_24468000	chr13	24467800	24468000	12763	Cmah
2361	chr6	119473000	119473200	200	151.232	3.07569	0.000547383	1	chip1_peak_3531	chr6_119473000_119473200	chr6	119473000	119473200	22419	Wnt5b
3082	chr10	78442500	78442700	200	151.325	3.07758	0.000715671	1	chip1_peak_4694	chr10_78442500_78442700	chr10	78442500	78442700	216134	Pdxk
1940	chr11	77800400	77800600	200	151.328	3.07763	0.000453933	1	chip1_peak_2883	chr11_77800400_77800600	chr11	77800400	77800600	360013	Myo18a
3936	chr13	47241700	47241900	200	151.329	3.07765	0.000902958	1	chip1_peak_6070	chr13_47241700_47241900	chr13	47241700	47241900	218215	Rnf144b
1604	chr19	44119200	44119400	200	151.346	3.07801	0.000369172	1	chip1_peak_2337	chr19_44119200_44119400	chr19	44119200	44119400	72502	Cwf19l1
2185	chr19	46475500	46475700	200	151.403	3.07916	0.000509981	1	chip1_peak_3263	chr19_46475500_46475700	chr19	46475500	46475700	24069	Sufu
239	chr12	103610200	103610600	400	151.483	3.08079	4.37e-05	1	chip1_peak_337	chr12_103610200_103610600	chr12	103610200	103610600	74521	Ppp4r4
2601	chr10	56379300	56379500	200	151.542	3.08199	0.000604584	1	chip1_peak_3930	chr10_56379300_56379500	chr10	56379300	56379500	14609	Gja1
3615	chr4	130756400	130756600	200	151.604	3.08325	0.000832726	1	chip1_peak_5558	chr4_130756400_130756600	chr4	130756400	130756600	80912	Pum1
1096	chr8	41066800	41067000	200	151.715	3.08551	0.000247882	1	chip1_peak_1580	chr8_41066800_41067000	chr8	41066800	41067000	102103	Mtus1
2742	chr4	140576300	140576500	200	151.748	3.08617	0.00063619	1	chip1_peak_4151	chr4_140576300_140576500	chr4	140576300	140576500	72754	Arhgef10l
1871	chr13	73805100	73805300	200	151.818	3.0876	0.000438894	1	chip1_peak_2783	chr13_73805100_73805300	chr13	73805100	73805300	20499	Slc12a7
1444	chr8	56593500	56593700	200	151.82	3.08764	0.000333976	1	chip1_peak_2104	chr8_56593500_56593700	chr8	56593500	56593700	50753	Fbxo8
750	chr9	108647600	108647800	200	151.853	3.0883	0.000171653	1	chip1_peak_1082	chr9_108647600_108647800	chr9	108647600	108647800	23807	Arih2
4302	chr10	61962800	61963000	200	151.87	3.08866	0.000981854	1	chip1_peak_6686	chr10_61962800_61963000	chr10	61962800	61963000	12817	Col13a1
2529	chr16	23968200	23968400	200	151.881	3.08889	0.000589952	1	chip1_peak_3828	chr16_23968200_23968400	chr16	23968200	23968400	12053	Bcl6
894	chr13	95698600	95698800	200	151.988	3.09107	0.000200865	1	chip1_peak_1274	chr13_95698600_95698800	chr13	95698600	95698800	14064	F2rl2
895	chr13	95698600	95698800	200	151.988	3.09107	0.000200865	1	chip1_peak_1274	chr13_95698600_95698800	chr13	95698600	95698800	544963	Iqgap2
3977	chr14	122224500	122224700	200	152.092	3.09318	0.00091339	1	chip1_peak_6154	chr14_122224500_122224700	chr14	122224500	122224700	69634	Clybl
1500	chr7	101504000	101504200	200	152.236	3.09609	0.000346241	1	chip1_peak_2187	chr7_101504000_101504200	chr7	101504000	101504200	207728	Pde2a
1861	chr4	140606300	140606500	200	152.245	3.09629	0.000434476	1	chip1_peak_2758	chr4_140606300_140606500	chr4	140606300	140606500	72754	Arhgef10l
1726	chr10	7692000	7692200	200	152.317	3.09775	0.000400912	1	chip1_peak_2529	chr10_7692000_7692200	chr10	7692000	7692200	16798	Lats1
990	chr5	140212200	140212500	300	152.355	3.09852	0.000221889	1	chip1_peak_1415	chr5_140212200_140212500	chr5	140212200	140212500	17120	Mad1l1
2384	chr5	32140900	32141100	200	152.462	3.1007	0.000552193	1	chip1_peak_3567	chr5_32140900_32141100	chr5	32140900	32141100	14284	Fosl2
408	chr14	65760700	65761000	300	152.467	3.1008	8.34e-05	1	chip1_peak_582	chr14_65760700_65761000	chr14	65760700	65761000	71145	Scara5
1832	chr4	45035400	45035600	200	152.482	3.10111	0.000423649	1	chip1_peak_2705	chr4_45035400_45035600	chr4	45035400	45035600	269529	Fbxo10
1564	chr15	32985700	32985900	200	152.554	3.10257	0.000360623	1	chip1_peak_2279	chr15_32985700_32985900	chr15	32985700	32985900	15529	Sdc2
3060	chr2	71897900	71898100	200	152.561	3.10271	0.000710223	1	chip1_peak_4653	chr2_71897900_71898100	chr2	71897900	71898100	228026	Pdk1
829	chr11	101333400	101333600	200	152.578	3.10305	0.000188699	1	chip1_peak_1183	chr11_101333400_101333600	chr11	101333400	101333600	11754	Aoc3
2773	chr9	70331200	70331400	200	152.684	3.1052	0.000644825	1	chip1_peak_4198	chr9_70331200_70331400	chr9	70331200	70331400	71602	Myo1e
577	chr2	14295200	14295400	200	152.749	3.10653	0.000126995	1	chip1_peak_831	chr2_14295200_14295400	chr2	14295200	14295400	17533	Mrc1
3254	chr1	84823800	84824000	200	152.754	3.10664	0.000752286	1	chip1_peak_4962	chr1_84823800_84824000	chr1	84823800	84824000	14897	Trip12
1101	chr17	32222500	32222700	200	152.809	3.10776	0.000249248	1	chip1_peak_1589	chr17_32222500_32222700	chr17	32222500	32222700	57261	Brd4
1426	chr11	52107200	52107400	200	152.824	3.10807	0.000329936	1	chip1_peak_2082	chr11_52107200_52107400	chr11	52107200	52107400	19052	Ppp2ca
3644	chr14	75764100	75764300	200	152.856	3.10872	0.000840273	1	chip1_peak_5606	chr14_75764100_75764300	chr14	75764100	75764300	67554	Slc25a30
2441	chr15	78910100	78910300	200	152.866	3.10892	0.000571977	1	chip1_peak_3684	chr15_78910100_78910300	chr15	78910100	78910300	20401	Sh3bp1
837	chr15	89157800	89158000	200	152.998	3.1116	0.000190353	1	chip1_peak_1193	chr15_89157800_89158000	chr15	89157800	89158000	140570	Plxnb2
1407	chr2	90946200	90946400	200	153.052	3.11269	0.000325166	1	chip1_peak_2047	chr2_90946200_90946400	chr2	90946200	90946400	13046	Celf1
2659	chr4	40820600	40820800	200	153.055	3.11275	0.00061867	1	chip1_peak_4021	chr4_40820600_40820800	chr4	40820600	40820800	14595	B4galt1
1507	chr5	50045100	50045300	200	153.12	3.11409	0.000348646	1	chip1_peak_2203	chr5_50045100_50045300	chr5	50045100	50045300	70693	Gpr125
147	chr16	35479300	35479500	200	153.134	3.11436	2.23e-05	0.899228	chip1_peak_214	chr16_35479300_35479500	chr16	35479300	35479500	72599	Pdia5
4373	chr7	19719100	19719300	200	153.149	3.11467	0.000998128	1	chip1_peak_6813	chr7_19719100_19719300	chr7	19719100	19719300	19294	Pvrl2
2485	chr11	115962300	115962500	200	153.159	3.11488	0.000584193	1	chip1_peak_3762	chr11_115962300_115962500	chr11	115962300	115962500	57230	Sap30bp
4232	chr7	75555200	75555400	200	153.236	3.11644	0.00096797	1	chip1_peak_6577	chr7_75555200_75555400	chr7	75555200	75555400	75547	Akap13
4203	chr13	24424000	24424200	200	153.244	3.11659	0.000959554	1	chip1_peak_6524	chr13_24424000_24424200	chr13	24424000	24424200	12763	Cmah
2885	chr16	16040100	16040300	200	153.252	3.11676	0.000670084	1	chip1_peak_4366	chr16_16040100_16040300	chr16	16040100	16040300	224008	Spidr
1561	chr8	123250600	123250800	200	153.328	3.1183	0.000359722	1	chip1_peak_2276	chr8_123250600_123250800	chr8	123250600	123250800	72325	Vps9d1
979	chr2	27175400	27175700	300	153.364	3.11905	0.000219097	1	chip1_peak_1399	chr2_27175400_27175700	chr2	27175400	27175700	13166	Dbh
3339	chr4	150154500	150154700	200	153.41	3.11998	0.000768726	1	chip1_peak_5091	chr4_150154500_150154700	chr4	150154500	150154700	435818	Slc2a7
253	chr5	136248500	136248800	300	153.464	3.12108	4.69e-05	1	chip1_peak_358	chr5_136248500_136248800	chr5	136248500	136248800	13047	Cux1
383	chr15	55846100	55846500	400	153.467	3.12115	7.96e-05	1	chip1_peak_549	chr15_55846100_55846500	chr15	55846100	55846500	20649	Sntb1
1243	chr5	121162200	121162400	200	153.51	3.12201	0.000285691	1	chip1_peak_1801	chr5_121162200_121162400	chr5	121162200	121162400	19247	Ptpn11
2666	chr12	80381700	80382000	300	153.525	3.12232	0.000620653	1	chip1_peak_4036	chr12_80381700_80382000	chr12	80381700	80382000	320808	Dcaf5
1244	chr15	31501000	31501200	200	153.573	3.12328	0.00028653	1	chip1_peak_1804	chr15_31501000_31501200	chr15	31501000	31501200	223455	2023-03-06
466	chr8	127085100	127085300	200	153.574	3.1233	9.69e-05	1	chip1_peak_666	chr8_127085100_127085300	chr8	127085100	127085300	93742	Pard3
3813	chr6	146750400	146750600	200	153.627	3.12438	0.000879374	1	chip1_peak_5877	chr6_146750400_146750600	chr6	146750400	146750600	232533	Stk38l
4127	chr12	70210200	70210400	200	153.64	3.12465	0.000941618	1	chip1_peak_6389	chr12_70210200_70210400	chr12	70210200	70210400	110095	Pygl
2610	chr14	122148400	122148600	200	153.675	3.12537	0.000606742	1	chip1_peak_3947	chr14_122148400_122148600	chr14	122148400	122148600	68059	Tm9sf2
2388	chr18	76012500	76012800	300	153.719	3.12626	0.000553293	1	chip1_peak_3573	chr18_76012500_76012800	chr18	76012500	76012800	207259	Zbtb7c
545	chr2	10099600	10099800	200	153.757	3.12703	0.000117232	1	chip1_peak_781	chr2_10099600_10099800	chr2	10099600	10099800	16425	Itih2
4001	chr5	134255400	134255600	200	153.798	3.12787	0.000918946	1	chip1_peak_6195	chr5_134255400_134255600	chr5	134255400	134255600	14886	Gtf2i
4039	chr15	77035000	77035200	200	153.838	3.12869	0.000925074	1	chip1_peak_6254	chr15_77035000_77035200	chr15	77035000	77035200	17189	Mb
1308	chr13	43420400	43420600	200	153.845	3.12883	0.000304705	1	chip1_peak_1901	chr13_43420400_43420600	chr13	43420400	43420600	226432	Ipo9
3436	chr4	107577000	107577200	200	153.849	3.1289	0.00078907	1	chip1_peak_5250	chr4_107577000_107577200	chr4	107577000	107577200	230587	Glis1
1362	chr15	10685300	10685600	300	153.877	3.12948	0.000316033	1	chip1_peak_1983	chr15_10685300_10685600	chr15	10685300	10685600	75646	Rai14
833	chr16	11131300	11131600	300	153.898	3.1299	0.000189336	1	chip1_peak_1187	chr16_11131300_11131600	chr16	11131300	11131600	106200	Txndc11
1521	chr14	7852600	7852800	200	153.902	3.12999	0.00035171	1	chip1_peak_2224	chr14_7852600_7852800	chr14	7852600	7852800	286940	Flnb
3627	chr14	99205100	99205300	200	154.053	3.13305	0.000834939	1	chip1_peak_5570	chr14_99205100_99205300	chr14	99205100	99205300	52023	Pibf1
4303	chr17	32512500	32512700	200	154.091	3.13383	0.000982214	1	chip1_peak_6687	chr17_32512500_32512700	chr17	32512500	32512700	208285	Cyp4f17
583	chr7	28315900	28316200	300	154.29	3.13788	0.000129156	1	chip1_peak_839	chr7_28315900_28316200	chr7	28315900	28316200	20924	Supt5
1434	chr16	10662300	10662500	200	154.414	3.14041	0.00033129	1	chip1_peak_2092	chr16_10662300_10662500	chr16	10662300	10662500	74374	Clec16a
2449	chr2	48879800	48880000	200	154.42	3.14053	0.000574331	1	chip1_peak_3696	chr2_48879800_48880000	chr2	48879800	48880000	11480	Acvr2a
2710	chr7	132127600	132127900	300	154.422	3.14057	0.000629394	1	chip1_peak_4106	chr7_132127600_132127900	chr7	132127600	132127900	55987	Cpxm2
1067	chr4	107047900	107048200	300	154.492	3.14198	0.000239754	1	chip1_peak_1533	chr4_107047900_107048200	chr4	107047900	107048200	72475	Ssbp3
457	chr18	39358600	39358900	300	154.494	3.14203	9.38e-05	1	chip1_peak_654	chr18_39358600_39358900	chr18	39358600	39358900	71302	Arhgap26
414	chr14	31209500	31209800	300	154.496	3.14207	8.46e-05	1	chip1_peak_591	chr14_31209500_31209800	chr14	31209500	31209800	21924	Tnnc1
2248	chr16	11140400	11140600	200	154.565	3.14347	0.000523864	1	chip1_peak_3358	chr16_11140400_11140600	chr16	11140400	11140600	106205	Zc3h7a
2141	chr11	5244900	5245200	300	154.679	3.14579	0.000501033	1	chip1_peak_3193	chr11_5244900_5245200	chr11	5244900	5245200	84035	Kremen1
4009	chr1	13310000	13310200	200	154.682	3.14585	0.000920333	1	chip1_peak_6209	chr1_13310000_13310200	chr1	13310000	13310200	17978	Ncoa2
2736	chr14	67844900	67845200	300	154.69	3.14601	0.000635437	1	chip1_peak_4143	chr14_67844900_67845200	chr14	67844900	67845200	68813	Dock5
2777	chr10	87923600	87923900	300	154.805	3.14835	0.000645255	1	chip1_peak_4203	chr10_87923600_87923900	chr10	87923600	87923900	16000	Igf1
2046	chr11	84366700	84367000	300	154.838	3.14902	0.000476225	1	chip1_peak_3040	chr11_84366700_84367000	chr11	84366700	84367000	107476	Acaca
4106	chr1	180906400	180906600	200	154.905	3.15038	0.000937563	1	chip1_peak_6360	chr1_180906400_180906600	chr1	180906400	180906600	69051	Pycr2
2370	chr1	52806500	52806700	200	154.922	3.15072	0.000548923	1	chip1_peak_3545	chr1_52806500_52806700	chr1	52806500	52806700	16329	Inpp1
911	chr10	61611100	61611400	300	154.924	3.15077	0.000205012	1	chip1_peak_1303	chr10_61611100_61611400	chr10	61611100	61611400	237362	Npffr1
2560	chr18	67776900	67777100	200	154.953	3.15135	0.000596811	1	chip1_peak_3874	chr18_67776900_67777100	chr18	67776900	67777100	72124	Seh1l
2561	chr18	67776900	67777100	200	154.953	3.15135	0.000596811	1	chip1_peak_3874	chr18_67776900_67777100	chr18	67776900	67777100	75286	4930549G23Rik
1865	chr2	26117000	26117200	200	154.965	3.1516	0.000435492	1	chip1_peak_2765	chr2_26117000_26117200	chr2	26117000	26117200	67991	Nacc2
1119	chr8	128433000	128433200	200	155.014	3.1526	0.000253533	1	chip1_peak_1614	chr8_128433000_128433200	chr8	128433000	128433200	18186	Nrp1
4003	chr8	11742100	11742300	200	155.068	3.15369	0.000919573	1	chip1_peak_6201	chr8_11742100_11742300	chr8	11742100	11742300	54126	Arhgef7
2492	chr5	124023900	124024100	200	155.086	3.15406	0.000585092	1	chip1_peak_3774	chr5_124023900_124024100	chr5	124023900	124024100	330192	Vps37b
1985	chr4	103115500	103115800	300	155.109	3.15453	0.000463649	1	chip1_peak_2952	chr4_103115500_103115800	chr4	103115500	103115800	71148	Mier1
1139	chr11	77778200	77778400	200	155.148	3.15532	0.000259054	1	chip1_peak_1644	chr11_77778200_77778400	chr11	77778200	77778400	360013	Myo18a
3086	chr17	34622900	34623200	300	155.252	3.15744	0.000716111	1	chip1_peak_4698	chr17_34622900_34623200	chr17	34622900	34623200	54397	Ppt2
4337	chr15	62167400	62167600	200	155.265	3.1577	0.000989743	1	chip1_peak_6748	chr15_62167400_62167600	chr15	62167400	62167600	19296	Pvt1
2503	chr11	89996300	89996500	200	155.378	3.16	0.000586352	1	chip1_peak_3790	chr11_89996300_89996500	chr11	89996300	89996500	18559	Pctp
3921	chr3	123375500	123375700	200	155.383	3.1601	0.000900205	1	chip1_peak_6046	chr3_123375500_123375700	chr3	123375500	123375700	210529	Mettl14
1926	chr2	43682900	43683100	200	155.42	3.16085	0.000451485	1	chip1_peak_2862	chr2_43682900_43683100	chr2	43682900	43683100	70789	Kynu
4225	chr2	103772300	103772500	200	155.503	3.16254	0.000966003	1	chip1_peak_6566	chr2_103772300_103772500	chr2	103772300	103772500	53872	Caprin1
380	chr6	90344300	90344600	300	155.505	3.16258	7.88e-05	1	chip1_peak_544	chr6_90344300_90344600	chr6	90344300	90344600	243537	Uroc1
2428	chr9	46022700	46022900	200	155.547	3.16343	0.000566804	1	chip1_peak_3653	chr9_46022700_46022900	chr9	46022700	46022900	70661	Sik3
2790	chr15	100917400	100917600	200	155.58	3.16412	0.000648212	1	chip1_peak_4226	chr15_100917400_100917600	chr15	100917400	100917600	20273	Scn8a
2241	chr18	25639700	25639900	200	155.588	3.16427	0.000522587	1	chip1_peak_3347	chr18_25639700_25639900	chr18	25639700	25639900	108013	Celf4
2646	chr12	110494100	110494300	200	155.596	3.16443	0.000615918	1	chip1_peak_3999	chr12_110494100_110494300	chr12	110494100	110494300	26931	Ppp2r5c
2065	chr3	79470200	79470400	200	155.621	3.16494	0.000482132	1	chip1_peak_3070	chr3_79470200_79470400	chr3	79470200	79470400	329679	Fnip2
3080	chr1	62713900	62714100	200	155.621	3.16494	0.000715349	1	chip1_peak_4691	chr1_62713900_62714100	chr1	62713900	62714100	18187	Nrp2
3259	chr11	83116900	83117100	200	155.8	3.16859	0.000753964	1	chip1_peak_4973	chr11_83116900_83117100	chr11	83116900	83117100	20555	Slfn1
515	chr5	87078500	87078800	300	155.803	3.16864	0.000105181	1	chip1_peak_727	chr5_87078500_87078800	chr5	87078500	87078800	231396	Ugt2b36
1575	chr12	40496400	40496600	200	155.859	3.16979	0.00036317	1	chip1_peak_2294	chr12_40496400_40496600	chr12	40496400	40496600	238130	Dock4
2592	chr18	31895300	31895500	200	155.891	3.17043	0.000603005	1	chip1_peak_3919	chr18_31895300_31895500	chr18	31895300	31895500	74320	Wdr33
3363	chr4	45441600	45441800	200	155.924	3.17111	0.000776522	1	chip1_peak_5137	chr4_45441600_45441800	chr4	45441600	45441800	230126	Shb
3504	chr3	121984900	121985100	200	155.956	3.17176	0.000803691	1	chip1_peak_5359	chr3_121984900_121985100	chr3	121984900	121985100	214137	Arhgap29
2013	chr1	36318500	36318700	200	155.988	3.17241	0.000469092	1	chip1_peak_2993	chr1_36318500_36318700	chr1	36318500	36318700	214855	Arid5a
2163	chr9	109089500	109089700	200	156.038	3.17342	0.000505539	1	chip1_peak_3227	chr9_109089500_109089700	chr9	109089500	109089700	66658	Ccdc51
2168	chr15	39927200	39927400	200	156.073	3.17414	0.000506359	1	chip1_peak_3233	chr15_39927200_39927400	chr15	39927200	39927400	239393	Lrp12
1120	chr8	70719100	70719300	200	156.088	3.17445	0.000253589	1	chip1_peak_1615	chr8_70719100_70719300	chr8	70719100	70719300	100502950	Gm3336
420	chr13	111802200	111802400	200	156.102	3.17473	8.52e-05	1	chip1_peak_599	chr13_111802200_111802400	chr13	111802200	111802400	26401	Map3k1
2147	chr11	77786900	77787100	200	156.104	3.17476	0.000503093	1	chip1_peak_3207	chr11_77786900_77787100	chr11	77786900	77787100	360013	Myo18a
3465	chr10	41297700	41297900	200	156.112	3.17492	0.000795191	1	chip1_peak_5297	chr10_41297700_41297900	chr10	41297700	41297900	103199	Fig4
2541	chr6	125050700	125050900	200	156.126	3.17522	0.000592898	1	chip1_peak_3847	chr6_125050700_125050900	chr6	125050700	125050900	54137	Acrbp
3143	chr5	74963100	74963300	200	156.131	3.17531	0.000730582	1	chip1_peak_4796	chr5_74963100_74963300	chr5	74963100	74963300	619945	Gm6116
123	chr4	109108200	109108500	300	156.138	3.17546	1.84e-05	0.846179	chip1_peak_182	chr4_109108200_109108500	chr4	109108200	109108500	100273	Osbpl9
3440	chr11	85522500	85522700	200	156.145	3.17559	0.000790034	1	chip1_peak_5258	chr11_85522500_85522700	chr11	85522500	85522700	192197	Bcas3
2325	chr7	143801500	143801700	200	156.222	3.17717	0.000539588	1	chip1_peak_3467	chr7_143801500_143801700	chr7	143801500	143801700	78914	Nadsyn1
1612	chr13	23696400	23696600	200	156.247	3.17767	0.000371964	1	chip1_peak_2350	chr13_23696400_23696600	chr13	23696400	23696600	107970	Hist1h1t
3696	chr4	150630000	150630200	200	156.249	3.17771	0.00085298	1	chip1_peak_5694	chr4_150630000_150630200	chr4	150630000	150630200	242773	Slc45a1
1026	chr19	47298500	47298700	200	156.272	3.17819	0.00023004	1	chip1_peak_1474	chr19_47298500_47298700	chr19	47298500	47298700	14218	Sh3pxd2a
1942	chr7	141521300	141521500	200	156.289	3.17852	0.000454148	1	chip1_peak_2885	chr7_141521300_141521500	chr7	141521300	141521500	68038	Chid1
3121	chr2	105388100	105388300	200	156.352	3.17981	0.000725712	1	chip1_peak_4762	chr2_105388100_105388300	chr2	105388100	105388300	19672	Rcn1
1954	chr4	57201300	57201500	200	156.355	3.17988	0.000456405	1	chip1_peak_2898	chr4_57201300_57201500	chr4	57201300	57201500	545622	Ptpn3
3635	chr16	70470400	70470600	200	156.398	3.18074	0.000837388	1	chip1_peak_5584	chr16_70470400_70470600	chr16	70470400	70470600	74185	Gbe1
2451	chr11	82869500	82869700	200	156.431	3.18143	0.000575299	1	chip1_peak_3700	chr11_82869500_82869700	chr11	82869500	82869700	67338	Rffl
360	chr8	117716900	117717100	200	156.432	3.18144	7.24e-05	1	chip1_peak_518	chr8_117716900_117717100	chr8	117716900	117717100	15486	Hsd17b2
1774	chr5	73228700	73228900	200	156.538	3.18359	0.000410537	1	chip1_peak_2603	chr5_73228700_73228900	chr5	73228700	73228900	72313	Fryl
3337	chr13	78220200	78220400	200	156.548	3.1838	0.000768533	1	chip1_peak_5088	chr13_78220200_78220400	chr13	78220200	78220400	320174	A830082K12Rik
2434	chr15	77113700	77113900	200	156.564	3.18412	0.000570471	1	chip1_peak_3673	chr15_77113700_77113900	chr15	77113700	77113900	93686	Rbfox2
1241	chr16	16073700	16073900	200	156.565	3.18415	0.000285373	1	chip1_peak_1798	chr16_16073700_16073900	chr16	16073700	16073900	224008	Spidr
1892	chr11	100790100	100790300	200	156.608	3.18502	0.000444431	1	chip1_peak_2816	chr11_100790100_100790300	chr11	100790100	100790300	20851	Stat5b
83	chr19	40042800	40043200	400	156.638	3.18562	8.17e-06	0.5457	chip1_peak_124	chr19_40042800_40043200	chr19	40042800	40043200	404195	Cyp2c54
1323	chr18	12866100	12866300	200	156.652	3.18591	0.000307922	1	chip1_peak_1922	chr18_12866100_12866300	chr18	12866100	12866300	64291	Osbpl1a
3931	chr1	37529300	37529500	200	156.66	3.18608	0.000902081	1	chip1_peak_6061	chr1_37529300_37529500	chr1	37529300	37529500	269181	Mgat4a
3932	chr9	63585100	63585300	200	156.66	3.18608	0.000902081	1	chip1_peak_6062	chr9_63585100_63585300	chr9	63585100	63585300	78250	Iqch
1113	chr1	59182600	59183100	500	156.667	3.18622	0.000252225	1	chip1_peak_1608	chr1_59182600_59183100	chr1	59182600	59183100	74018	Als2
889	chr9	64701200	64701500	300	156.821	3.18935	0.00020046	1	chip1_peak_1269	chr9_64701200_64701500	chr9	64701200	64701500	214058	Megf11
3849	chr6	51893300	51893500	200	156.823	3.18938	0.000884768	1	chip1_peak_5927	chr6_51893300_51893500	chr6	51893300	51893500	54353	Skap2
19	chr4	6272200	6272600	400	156.828	3.1895	2.94e-07	0.0783735	chip1_peak_25	chr4_6272200_6272600	chr4	6272200	6272600	13122	Cyp7a1
1318	chr1	87978800	87979200	400	156.839	3.18972	0.00030676	1	chip1_peak_1917	chr1_87978800_87979200	chr1	87978800	87979200	227334	Usp40
2173	chr16	78308800	78309000	200	156.844	3.18982	0.000507413	1	chip1_peak_3244	chr16_78308800_78309000	chr16	78308800	78309000	13052	Cxadr
1723	chr2	157889800	157890100	300	156.854	3.19002	0.000400192	1	chip1_peak_2525	chr2_157889800_157890100	chr2	157889800	157890100	66642	Ctnnbl1
3291	chr18	63689000	63689200	200	156.917	3.19131	0.000759075	1	chip1_peak_5018	chr18_63689000_63689200	chr18	63689000	63689200	53382	Txnl1
3095	chr17	62627700	62627900	200	156.928	3.19152	0.000719504	1	chip1_peak_4717	chr17_62627700_62627900	chr17	62627700	62627900	13640	Efna5
2774	chr6	51581400	51581700	300	156.949	3.19195	0.000644869	1	chip1_peak_4199	chr6_51581400_51581700	chr6	51581400	51581700	71982	Snx10
1063	chr16	38565700	38565900	200	156.957	3.19211	0.00023867	1	chip1_peak_1526	chr16_38565700_38565900	chr16	38565700	38565900	67846	Tmem39a
3531	chr3	152405700	152405900	200	156.966	3.1923	0.000812486	1	chip1_peak_5414	chr3_152405700_152405900	chr3	152405700	152405900	108946	Zzz3
760	chr1	88191100	88191300	200	156.97	3.19238	0.000173236	1	chip1_peak_1095	chr1_88191100_88191300	chr1	88191100	88191300	394432	Ugt1a7c
761	chr1	88191100	88191300	200	156.97	3.19238	0.000173236	1	chip1_peak_1095	chr1_88191100_88191300	chr1	88191100	88191300	394433	Ugt1a5
762	chr1	88191100	88191300	200	156.97	3.19238	0.000173236	1	chip1_peak_1095	chr1_88191100_88191300	chr1	88191100	88191300	394435	Ugt1a6b
763	chr1	88191100	88191300	200	156.97	3.19238	0.000173236	1	chip1_peak_1095	chr1_88191100_88191300	chr1	88191100	88191300	94284	Ugt1a6a
2174	chr4	155272200	155272400	200	156.999	3.19296	0.000507742	1	chip1_peak_3245	chr4_155272200_155272400	chr4	155272200	155272400	18762	Prkcz
2152	chr5	74441200	74441400	200	157.127	3.19556	0.000503826	1	chip1_peak_3214	chr5_74441200_74441400	chr5	74441200	74441400	212986	Scfd2
2150	chr18	64378900	64379100	200	157.131	3.19565	0.000503445	1	chip1_peak_3211	chr18_64378900_64379100	chr18	64378900	64379100	225631	Onecut2
3535	chr8	91391300	91391500	200	157.28	3.19868	0.000814183	1	chip1_peak_5423	chr8_91391300_91391500	chr8	91391300	91391500	26383	Fto
2888	chr14	11819100	11819300	200	157.313	3.19936	0.000670259	1	chip1_peak_4372	chr14_11819100_11819300	chr14	11819100	11819300	19270	Ptprg
2126	chr7	28928300	28928500	200	157.383	3.20077	0.000497999	1	chip1_peak_3174	chr7_28928300_28928500	chr7	28928300	28928500	60595	Actn4
3725	chr4	137283300	137283500	200	157.397	3.20107	0.00085898	1	chip1_peak_5732	chr4_137283300_137283500	chr4	137283300	137283500	22417	Wnt4
645	chr8	24548800	24549100	300	157.428	3.2017	0.000143573	1	chip1_peak_927	chr8_24548800_24549100	chr8	24548800	24549100	209176	Ido2
3766	chr15	7153200	7153400	200	157.44	3.20193	0.000867623	1	chip1_peak_5800	chr15_7153200_7153400	chr15	7153200	7153400	16880	Lifr
1901	chr19	34701500	34701700	200	157.521	3.20358	0.000446922	1	chip1_peak_2829	chr19_34701500_34701700	chr19	34701500	34701700	240638	Slc16a12
1945	chr2	68981300	68981500	200	157.543	3.20403	0.000454374	1	chip1_peak_2888	chr2_68981300_68981500	chr2	68981300	68981500	241447	Cers6
3398	chr4	107243700	107244000	300	157.545	3.20407	0.000781525	1	chip1_peak_5186	chr4_107243700_107244000	chr4	107243700	107244000	77809	Lrrc42
2464	chr15	80345300	80345500	200	157.609	3.20538	0.00057722	1	chip1_peak_3718	chr15_80345300_80345500	chr15	80345300	80345500	239556	Cacna1i
2095	chr17	25846200	25846400	200	157.644	3.20608	0.000490736	1	chip1_peak_3122	chr17_25846200_25846400	chr17	25846200	25846400	106618	Wdr90
3053	chr15	3528500	3528700	200	157.789	3.20904	0.000709041	1	chip1_peak_4641	chr15_3528500_3528700	chr15	3528500	3528700	58991	Ghrl
169	chr5	92491700	92491900	200	157.849	3.21026	2.74e-05	0.977408	chip1_peak_248	chr5_92491700_92491900	chr5	92491700	92491900	12492	Scarb2
105	chr15	64260200	64260500	300	157.905	3.2114	1.42e-05	0.751871	chip1_peak_158	chr15_64260200_64260500	chr15	64260200	64260500	13196	Asap1
3568	chr11	70616400	70616600	200	157.91	3.21149	0.000822626	1	chip1_peak_5476	chr11_70616400_70616600	chr11	70616400	70616600	11448	Chrne
3569	chr11	70616400	70616600	200	157.91	3.21149	0.000822626	1	chip1_peak_5476	chr11_70616400_70616600	chr11	70616400	70616600	668433	4930544D05Rik
617	chr11	86741700	86741900	200	157.91	3.2115	0.000136359	1	chip1_peak_887	chr11_86741700_86741900	chr11	86741700	86741900	102465902	Mir8115
618	chr11	86741700	86741900	200	157.91	3.2115	0.000136359	1	chip1_peak_887	chr11_86741700_86741900	chr11	86741700	86741900	67300	Cltc
1764	chr18	38840100	38840300	200	157.917	3.21164	0.000407913	1	chip1_peak_2587	chr18_38840100_38840300	chr18	38840100	38840300	14164	Fgf1
4360	chr9	62960100	62960300	200	157.972	3.21276	0.000995352	1	chip1_peak_6791	chr9_62960100_62960300	chr9	62960100	62960300	56469	Pias1
3306	chr6	126005500	126005700	200	157.983	3.21299	0.000761924	1	chip1_peak_5041	chr6_126005500_126005700	chr6	126005500	126005700	243634	Ano2
1487	chr5	121940800	121941000	200	158.066	3.21467	0.000343534	1	chip1_peak_2168	chr5_121940800_121941000	chr5	121940800	121941000	13048	Cux2
1203	chr16	4956100	4956300	200	158.128	3.21593	0.000274373	1	chip1_peak_1745	chr16_4956100_4956300	chr16	4956100	4956300	72615	Anks3
4187	chrX	102037400	102037600	200	158.178	3.21695	0.000955546	1	chip1_peak_6488	chrX_102037400_102037600	chrX	102037400	102037600	100042480	Nhsl2
1852	chr12	88450000	88450200	200	158.206	3.21752	0.000429199	1	chip1_peak_2738	chr12_88450000_88450200	chr12	88450000	88450200	72113	Adck1
4196	chr6	114407500	114407700	200	158.268	3.21878	0.000958079	1	chip1_peak_6512	chr6_114407500_114407700	chr6	114407500	114407700	15465	Hrh1
3225	chr17	31003400	31003600	200	158.353	3.22051	0.000746437	1	chip1_peak_4918	chr17_31003400_31003600	chr17	31003400	31003600	52020	Umodl1
841	chr15	31519200	31519400	200	158.404	3.22155	0.000191139	1	chip1_peak_1197	chr15_31519200_31519400	chr15	31519200	31519400	223455	2023-03-06
4069	chr14	11845600	11845800	200	158.425	3.22197	0.000931166	1	chip1_peak_6301	chr14_11845600_11845800	chr14	11845600	11845800	19270	Ptprg
1680	chr13	37929800	37930000	200	158.454	3.22257	0.000390185	1	chip1_peak_2459	chr13_37929800_37930000	chr13	37929800	37930000	68750	Rreb1
2274	chr4	140160100	140160400	300	158.553	3.22457	0.000529252	1	chip1_peak_3394	chr4_140160100_140160400	chr4	140160100	140160400	230868	Igsf21
1537	chr17	57084800	57085000	200	158.56	3.22472	0.000355514	1	chip1_peak_2248	chr17_57084800_57085000	chr17	57084800	57085000	22153	Tubb4a
3437	chr8	123390200	123390400	200	158.677	3.2271	0.000789153	1	chip1_peak_5251	chr8_123390200_123390400	chr8	123390200	123390400	66855	Tcf25
3453	chr8	4216000	4216200	200	158.687	3.2273	0.000791899	1	chip1_peak_5277	chr8_4216000_4216200	chr8	4216000	4216200	10090	73072
391	chr11	75503500	75503800	300	158.72	3.22796	8.03e-05	1	chip1_peak_558	chr11_75503500_75503800	chr11	75503500	75503800	192159	Prpf8
2880	chr12	79271000	79271200	200	158.762	3.22882	0.000669298	1	chip1_peak_4360	chr12_79271000_79271200	chr12	79271000	79271200	211978	Zfyve26
972	chr16	49859900	49860100	200	158.776	3.2291	0.000218686	1	chip1_peak_1390	chr16_49859900_49860100	chr16	49859900	49860100	16423	Cd47
184	chr7	143831900	143832300	400	158.873	3.23109	2.97e-05	0.993526	chip1_peak_265	chr7_143831900_143832300	chr7	143831900	143832300	13360	Dhcr7
3344	chr8	104928300	104928500	200	158.878	3.23119	0.000771676	1	chip1_peak_5102	chr8_104928300_104928500	chr8	104928300	104928500	234673	Ces2e
731	chr16	87704900	87705100	200	158.906	3.23175	0.000167696	1	chip1_peak_1058	chr16_87704900_87705100	chr16	87704900	87705100	237911	Brip1
648	chr14	56580800	56581100	300	158.949	3.23262	0.000145113	1	chip1_peak_935	chr14_56580800_56581100	chr14	56580800	56581100	328417	Parp4
3736	chr16	97862900	97863200	300	158.949	3.23263	0.000860991	1	chip1_peak_5750	chr16_97862900_97863200	chr16	97862900	97863200	207781	C2cd2
3180	chr2	71503700	71503900	200	158.957	3.23278	0.000737557	1	chip1_peak_4852	chr2_71503700_71503900	chr2	71503700	71503900	66559	Metap1d
2178	chr5	105798800	105799100	300	158.992	3.2335	0.000508696	1	chip1_peak_3250	chr5_105798800_105799100	chr5	105798800	105799100	231549	Lrrc8d
2878	chr7	45368000	45368200	200	159.043	3.23453	0.000668336	1	chip1_peak_4354	chr7_45368000_45368200	chr7	45368000	45368200	22342	Lin7b
1388	chr18	33209200	33209500	300	159.046	3.2346	0.000321496	1	chip1_peak_2021	chr18_33209200_33209500	chr18	33209200	33209500	170459	Stard4
4071	chr16	34328100	34328300	200	159.049	3.23466	0.000932021	1	chip1_peak_6308	chr16_34328100_34328300	chr16	34328100	34328300	545156	Kalrn
4190	chr15	39905800	39906000	200	159.067	3.23504	0.000956587	1	chip1_peak_6502	chr15_39905800_39906000	chr15	39905800	39906000	239393	Lrp12
2910	chr18	65047300	65047600	300	159.085	3.2354	0.000674719	1	chip1_peak_4408	chr18_65047300_65047600	chr18	65047300	65047600	83814	Nedd4l
1580	chr19	42085600	42085800	200	159.12	3.23611	0.000364063	1	chip1_peak_2301	chr19_42085600_42085800	chr19	42085600	42085800	226123	Morn4
2533	chr15	85047700	85047900	200	159.126	3.23622	0.000591081	1	chip1_peak_3834	chr15_85047700_85047900	chr15	85047700	85047900	73225	Fam118a
1595	chr19	4301500	4301700	200	159.254	3.23882	0.000367585	1	chip1_peak_2321	chr19_4301500_4301700	chr19	4301500	4301700	110355	Adrbk1
2769	chr8	79354600	79354800	200	159.268	3.23911	0.000643728	1	chip1_peak_4193	chr8_79354600_79354800	chr8	79354600	79354800	17125	Smad1
2981	chr9	111241100	111241300	200	159.317	3.24011	0.000693413	1	chip1_peak_4528	chr9_111241100_111241300	chr9	111241100	111241300	17350	Mlh1
677	chr1	88090500	88090900	400	159.376	3.24132	0.00015403	1	chip1_peak_978	chr1_88090500_88090900	chr1	88090500	88090900	394432	Ugt1a7c
678	chr1	88090500	88090900	400	159.376	3.24132	0.00015403	1	chip1_peak_978	chr1_88090500_88090900	chr1	88090500	88090900	394435	Ugt1a6b
3856	chr16	97557200	97557400	200	159.458	3.24298	0.000887297	1	chip1_peak_5940	chr16_97557200_97557400	chr16	97557200	97557400	17858	Mx2
1310	chr7	73460100	73460300	200	159.477	3.24336	0.000305712	1	chip1_peak_1908	chr7_73460100_73460300	chr7	73460100	73460300	244059	Chd2
3214	chr2	130437300	130437500	200	159.487	3.24357	0.000744327	1	chip1_peak_4900	chr2_130437300_130437500	chr2	130437300	130437500	80743	Vps16
1305	chr12	80805000	80805200	200	159.504	3.24391	0.000303749	1	chip1_peak_1897	chr12_80805000_80805200	chr12	80805000	80805200	217684	Susd6
2927	chr12	85602100	85602300	200	159.599	3.24585	0.000677329	1	chip1_peak_4433	chr12_85602100_85602300	chr12	85602100	85602300	81703	Jdp2
3557	chr2	5526400	5526600	200	159.602	3.2459	0.000819627	1	chip1_peak_5459	chr2_5526400_5526600	chr2	5526400	5526600	227541	Camk1d
3200	chr12	80376600	80376800	200	159.616	3.2462	0.00074125	1	chip1_peak_4881	chr12_80376600_80376800	chr12	80376600	80376800	320808	Dcaf5
1049	chrX	52147400	52147700	300	159.676	3.24741	0.000235599	1	chip1_peak_1507	chrX_52147400_52147700	chrX	52147400	52147700	14735	Gpc4
3523	chr17	46971600	46971800	200	159.714	3.24818	0.000808884	1	chip1_peak_5399	chr17_46971600_46971800	chr17	46971600	46971800	224826	Ubr2
3489	chr7	144383700	144383900	200	159.771	3.24935	0.000800459	1	chip1_peak_5338	chr7_144383700_144383900	chr7	144383700	144383900	100499519	Mir3470b
3490	chr7	144383700	144383900	200	159.771	3.24935	0.000800459	1	chip1_peak_5338	chr7_144383700_144383900	chr7	144383700	144383900	210274	Shank2
806	chr5	125116600	125116800	200	159.777	3.24947	0.000182114	1	chip1_peak_1150	chr5_125116600_125116800	chr5	125116600	125116800	20602	Ncor2
701	chr11	88907400	88907700	300	159.781	3.24955	0.000159942	1	chip1_peak_1008	chr11_88907400_88907700	chr11	88907400	88907700	73921	Scpep1os
393	chr11	62446600	62446900	300	159.8	3.24993	8.06e-05	1	chip1_peak_560	chr11_62446600_62446900	chr11	62446600	62446900	20185	Ncor1
1069	chr18	64363400	64363700	300	159.857	3.25108	0.000240373	1	chip1_peak_1535	chr18_64363400_64363700	chr18	64363400	64363700	225631	Onecut2
4199	chr10	77129000	77129200	200	159.89	3.25176	0.000959385	1	chip1_peak_6517	chr10_77129000_77129200	chr10	77129000	77129200	12822	Col18a1
2834	chr17	24184400	24184600	200	160.009	3.25418	0.000658888	1	chip1_peak_4294	chr17_24184400_24184600	chr17	24184400	24184600	224617	Tbc1d24
3367	chr14	65942900	65943100	200	160.094	3.25591	0.000776781	1	chip1_peak_5140	chr14_65942900_65943100	chr14	65942900	65943100	219151	Scara3
2132	chrX	52126100	52126400	300	160.132	3.25668	0.000499889	1	chip1_peak_3183	chrX_52126100_52126400	chrX	52126100	52126400	14735	Gpc4
2850	chr8	70437400	70437600	200	160.139	3.25684	0.000661895	1	chip1_peak_4314	chr8_70437400_70437600	chr8	70437400	70437600	382056	Crtc1
861	chr9	71742500	71742700	200	160.208	3.25824	0.000195574	1	chip1_peak_1230	chr9_71742500_71742700	chr9	71742500	71742700	68178	Cgnl1
3052	chr19	55647200	55647400	200	160.232	3.25872	0.000708378	1	chip1_peak_4640	chr19_55647200_55647400	chr19	55647200	55647400	77594	4930552P12Rik
3049	chr2	156709400	156709600	200	160.241	3.2589	0.000708187	1	chip1_peak_4637	chr2_156709400_156709600	chr2	156709400	156709600	228836	Dlgap4
1223	chr16	31683800	31684100	300	160.315	3.26042	0.000281521	1	chip1_peak_1774	chr16_31683800_31684100	chr16	31683800	31684100	13383	Dlg1
812	chr6	149332800	149333100	300	160.347	3.26106	0.000184012	1	chip1_peak_1161	chr6_149332800_149333100	chr6	149332800	149333100	67246	2810474O19Rik
3592	chr5	3390400	3390700	300	160.359	3.26131	0.000826767	1	chip1_peak_5513	chr5_3390400_3390700	chr5	3390400	3390700	12571	Cdk6
3865	chr15	55902300	55902500	200	160.397	3.26208	0.000889098	1	chip1_peak_5954	chr15_55902300_55902500	chr15	55902300	55902500	20649	Sntb1
2644	chr9	110584800	110585100	300	160.417	3.26249	0.000615468	1	chip1_peak_3997	chr9_110584800_110585100	chr9	110584800	110585100	235626	Setd2
1276	chr5	136105400	136105700	300	160.434	3.26283	0.000294459	1	chip1_peak_1850	chr5_136105400_136105700	chr5	136105400	136105700	102465626	Mir7035
1277	chr5	136105400	136105700	300	160.434	3.26283	0.000294459	1	chip1_peak_1850	chr5_136105400_136105700	chr5	136105400	136105700	54153	Rasa4
2276	chr8	71618300	71618600	300	160.464	3.26343	0.000529546	1	chip1_peak_3397	chr8_71618300_71618600	chr8	71618300	71618600	234407	Glt25d1
2953	chr13	41811500	41811700	200	160.469	3.26353	0.000684114	1	chip1_peak_4476	chr13_41811500_41811700	chr13	41811500	41811700	109254	Adtrp
3163	chr3	89220100	89220300	200	160.484	3.26385	0.000732818	1	chip1_peak_4822	chr3_89220100_89220300	chr3	89220100	89220300	21827	Thbs3
2770	chr4	151014700	151014900	200	160.55	3.26518	0.000643874	1	chip1_peak_4194	chr4_151014700_151014900	chr4	151014700	151014900	18628	Per3
2984	chr4	56936400	56936600	200	160.609	3.26639	0.000693969	1	chip1_peak_4532	chr4_56936400_56936600	chr4	56936400	56936600	242474	Tmem245
1704	chr15	78465100	78465300	200	160.626	3.26672	0.000395095	1	chip1_peak_2490	chr15_78465100_78465300	chr15	78465100	78465300	71753	Tmprss6
3911	chr19	7237400	7237600	200	160.711	3.26847	0.00089781	1	chip1_peak_6026	chr19_7237400_7237600	chr19	7237400	7237600	70999	Naa40
1216	chr13	60642800	60643000	200	160.742	3.2691	0.000277483	1	chip1_peak_1764	chr13_60642800_60643000	chr13	60642800	60643000	69635	Dapk1
1357	chr10	87879400	87879600	200	160.837	3.27102	0.000314924	1	chip1_peak_1976	chr10_87879400_87879600	chr10	87879400	87879600	16000	Igf1
140	chr5	86924700	86924900	200	160.841	3.2711	2.13e-05	0.896405	chip1_peak_204	chr5_86924700_86924900	chr5	86924700	86924900	71773	Ugt2b1
740	chr10	42188500	42188700	200	160.902	3.27235	0.000170085	1	chip1_peak_1070	chr10_42188500_42188700	chr10	42188500	42188700	56484	Foxo3
2040	chr10	127731500	127731700	200	160.92	3.27272	0.000475406	1	chip1_peak_3032	chr10_127731500_127731700	chr10	127731500	127731700	21334	Tac2
2937	chr16	17679900	17680100	200	160.938	3.27308	0.000678959	1	chip1_peak_4444	chr16_17679900_17680100	chr16	17679900	17680100	94112	Med15
2938	chr9	55238100	55238300	200	160.938	3.27308	0.000678959	1	chip1_peak_4446	chr9_55238100_55238300	chr9	55238100	55238300	83961	Nrg4
2425	chr3	98326900	98327100	200	160.971	3.27376	0.000565387	1	chip1_peak_3644	chr3_98326900_98327100	chr3	98326900	98327100	236539	Phgdh
4365	chr11	116688500	116688700	200	160.986	3.27406	0.000996125	1	chip1_peak_6798	chr11_116688500_116688700	chr11	116688500	116688700	20446	St6galnac2
3150	chr14	122600000	122600200	200	161.021	3.27477	0.0007312	1	chip1_peak_4804	chr14_122600000_122600200	chr14	122600000	122600200	110821	Pcca
2413	chr7	98595600	98595800	200	161.043	3.27521	0.000562639	1	chip1_peak_3625	chr7_98595600_98595800	chr7	98595600	98595800	233545	2210018M11Rik
337	chr17	34866000	34866200	200	161.055	3.27546	6.69e-05	1	chip1_peak_487	chr17_34866000_34866200	chr17	34866000	34866200	26440	Psma1
2637	chr15	76086200	76086400	200	161.057	3.27551	0.000613909	1	chip1_peak_3987	chr15_76086200_76086400	chr15	76086200	76086400	223649	Nrbp2
1399	chr19	56798500	56798700	200	161.074	3.27585	0.000323758	1	chip1_peak_2036	chr19_56798500_56798700	chr19	56798500	56798700	213993	Ccdc186
1730	chr4	3699000	3699200	200	161.13	3.27697	0.000401526	1	chip1_peak_2537	chr4_3699000_3699200	chr4	3699000	3699200	17096	Lyn
904	chr11	54557900	54558200	300	161.148	3.27736	0.000203871	1	chip1_peak_1294	chr11_54557900_54558200	chr11	54557900	54558200	192786	Rapgef6
3077	chr2	64921200	64921400	200	161.15	3.2774	0.000714096	1	chip1_peak_4686	chr2_64921200_64921400	chr2	64921200	64921400	50915	Grb14
3730	chr8	47957200	47957400	200	161.347	3.28139	0.000859718	1	chip1_peak_5740	chr8_47957200_47957400	chr8	47957200	47957400	52357	Wwc2
4341	chr4	152446100	152446300	200	161.366	3.28179	0.000990469	1	chip1_peak_6752	chr4_152446100_152446300	chr4	152446100	152446300	16498	Kcnab2
4013	chr15	77036600	77036800	200	161.382	3.28211	0.000921154	1	chip1_peak_6215	chr15_77036600_77036800	chr15	77036600	77036800	17189	Mb
2383	chr4	124703300	124703500	200	161.451	3.28351	0.000552109	1	chip1_peak_3566	chr4_124703300_124703500	chr4	124703300	124703500	14201	Fhl3
1245	chr3	88647000	88647300	300	161.454	3.28357	0.000286718	1	chip1_peak_1805	chr3_88647000_88647300	chr3	88647000	88647300	16800	Arhgef2
523	chr19	47456100	47456300	200	161.475	3.28401	0.00010801	1	chip1_peak_740	chr19_47456100_47456300	chr19	47456100	47456300	14218	Sh3pxd2a
65	chr12	103603900	103604400	500	161.539	3.2853	4.77e-06	0.427622	chip1_peak_91	chr12_103603900_103604400	chr12	103603900	103604400	74521	Ppp4r4
708	chr15	75900700	75901200	500	161.56	3.28573	0.0001611	1	chip1_peak_1020	chr15_75900700_75901200	chr15	75900700	75901200	66656	Eef1d
3331	chr16	10562500	10562700	200	161.563	3.28579	0.000767908	1	chip1_peak_5081	chr16_10562500_10562700	chr16	10562500	10562700	74374	Clec16a
983	chr8	69826100	69826400	300	161.76	3.28979	0.000220163	1	chip1_peak_1404	chr8_69826100_69826400	chr8	69826100	69826400	53978	Lpar2
3223	chr5	8737000	8737200	200	161.844	3.29151	0.000745898	1	chip1_peak_4913	chr5_8737000_8737200	chr5	8737000	8737200	18671	Abcb1a
2354	chr19	45995200	45995500	300	161.908	3.2928	0.000545545	1	chip1_peak_3520	chr19_45995200_45995500	chr19	45995200	45995500	71617	9130011E15Rik
4065	chr1	140157400	140157600	200	161.944	3.29353	0.000930101	1	chip1_peak_6294	chr1_140157400_140157600	chr1	140157400	140157600	12628	Cfh
1556	chr5	103803500	103803700	200	161.971	3.29409	0.000358295	1	chip1_peak_2268	chr5_103803500_103803700	chr5	103803500	103803700	17355	Aff1
1416	chr13	54597800	54598000	200	162.03	3.29528	0.000326481	1	chip1_peak_2062	chr13_54597800_54598000	chr13	54597800	54598000	74325	Cltb
532	chr16	34035000	34035200	200	162.048	3.29566	0.000110204	1	chip1_peak_752	chr16_34035000_34035200	chr16	34035000	34035200	545156	Kalrn
2455	chr7	144409900	144410100	200	162.069	3.29608	0.000576067	1	chip1_peak_3707	chr7_144409900_144410100	chr7	144409900	144410100	100499519	Mir3470b
2456	chr7	144409900	144410100	200	162.069	3.29608	0.000576067	1	chip1_peak_3707	chr7_144409900_144410100	chr7	144409900	144410100	210274	Shank2
2565	chr16	11591900	11592100	200	162.075	3.29621	0.000597706	1	chip1_peak_3879	chr16_11591900_11592100	chr16	11591900	11592100	74478	Snx29
2977	chr14	64793300	64793500	200	162.115	3.29701	0.000690425	1	chip1_peak_4519	chr14_64793300_64793500	chr14	64793300	64793500	16554	Kif13b
2468	chr10	92131700	92131900	200	162.169	3.29812	0.000577421	1	chip1_peak_3723	chr10_92131700_92131900	chr10	92131700	92131900	110333	Rmst
2929	chr2	145817500	145817700	200	162.182	3.29839	0.000677463	1	chip1_peak_4435	chr2_145817500_145817700	chr2	145817500	145817700	74030	Rin2
2217	chr16	11640600	11640800	200	162.196	3.29866	0.000517609	1	chip1_peak_3311	chr16_11640600_11640800	chr16	11640600	11640800	74478	Snx29
2446	chr15	75657900	75658100	200	162.198	3.2987	0.000573686	1	chip1_peak_3693	chr15_75657900_75658100	chr15	75657900	75658100	72960	Top1mt
1105	chr7	81676000	81676200	200	162.242	3.29961	0.000250778	1	chip1_peak_1597	chr7_81676000_81676200	chr7	81676000	81676200	26557	Homer2
3420	chr12	30309900	30310200	300	162.358	3.30196	0.000786634	1	chip1_peak_5228	chr12_30309900_30310200	chr12	30309900	30310200	268534	Sntg2
855	chr11	121266100	121266300	200	162.416	3.30314	0.000194384	1	chip1_peak_1220	chr11_121266100_121266300	chr11	121266100	121266300	68837	Foxk2
3481	chr18	36555000	36555200	200	162.457	3.30397	0.000799279	1	chip1_peak_5327	chr18_36555000_36555200	chr18	36555000	36555200	240215	Slc4a9
2627	chr13	23707700	23707900	200	162.458	3.30399	0.000611193	1	chip1_peak_3970	chr13_23707700_23707900	chr13	23707700	23707900	15216	Hfe
712	chr5	114447500	114447700	200	162.47	3.30424	0.000162852	1	chip1_peak_1028	chr5_114447500_114447700	chr5	114447500	114447700	17855	Mvk
820	chr17	37050600	37050900	300	162.645	3.30779	0.000187035	1	chip1_peak_1173	chr17_37050600_37050900	chr17	37050600	37050900	54393	Gabbr1
4355	chr18	68319100	68319300	200	162.684	3.30859	0.000994735	1	chip1_peak_6784	chr18_68319100_68319300	chr18	68319100	68319300	67897	Rnmt
2564	chr2	146295900	146296100	200	162.734	3.3096	0.00059718	1	chip1_peak_3878	chr2_146295900_146296100	chr2	146295900	146296100	241694	Ralgapa2
1439	chr9	61404900	61405100	200	162.812	3.31119	0.00033247	1	chip1_peak_2097	chr9_61404900_61405100	chr9	61404900	61405100	21887	Tle3
2119	chr15	59596900	59597100	200	163.044	3.31592	0.0004952	1	chip1_peak_3160	chr15_59596900_59597100	chr15	59596900	59597100	68501	Nsmce2
2328	chr17	84444100	84444300	200	163.09	3.31685	0.000540254	1	chip1_peak_3474	chr17_84444100_84444300	chr17	84444100	84444300	240174	Thada
1909	chr19	41962100	41962300	200	163.126	3.31759	0.000447917	1	chip1_peak_2839	chr19_41962100_41962300	chr19	41962100	41962300	72199	Mms19
2528	chr3	89404800	89405000	200	163.129	3.31764	0.000589798	1	chip1_peak_3825	chr3_89404800_89405000	chr3	89404800	89405000	319945	Flad1
2499	chr13	119695400	119695600	200	163.157	3.31822	0.000585983	1	chip1_peak_3785	chr13_119695400_119695600	chr13	119695400	119695600	208715	Hmgcs1
3513	chr1	155792500	155792700	200	163.17	3.31848	0.00080612	1	chip1_peak_5378	chr1_155792500_155792700	chr1	155792500	155792700	104009	Qsox1
2479	chr1	59299300	59299500	200	163.194	3.31897	0.000582034	1	chip1_peak_3748	chr1_59299300_59299500	chr1	59299300	59299500	271697	Cdk15
2634	chr4	9665300	9665500	200	163.228	3.31964	0.000613348	1	chip1_peak_3983	chr4_9665300_9665500	chr4	9665300	9665500	65973	Asph
2329	chr10	128403700	128403900	200	163.342	3.32197	0.00054054	1	chip1_peak_3475	chr10_128403700_128403900	chr10	128403700	128403900	69917	Nabp2
2250	chr17	56625600	56625800	200	163.398	3.3231	0.000524329	1	chip1_peak_3361	chr17_56625600_56625800	chr17	56625600	56625800	74142	Lonp1
550	chr5	34954000	34954300	300	163.41	3.32336	0.000119351	1	chip1_peak_788	chr5_34954000_34954300	chr5	34954000	34954300	71729	Rgs12
823	chr6	85446700	85446900	200	163.528	3.32575	0.000187533	1	chip1_peak_1176	chr6_85446700_85446900	chr6	85446700	85446900	73327	Pradc1
413	chr12	81945700	81945900	200	163.549	3.32618	8.45e-05	1	chip1_peak_589	chr12_81945700_81945900	chr12	81945700	81945900	54604	Pcnx
997	chr10	19005100	19005300	200	163.571	3.32663	0.000223472	1	chip1_peak_1427	chr10_19005100_19005300	chr10	19005100	19005300	21929	Tnfaip3
998	chr9	123118700	123118900	200	163.571	3.32663	0.000223472	1	chip1_peak_1428	chr9_123118700_123118900	chr9	123118700	123118900	66446	Exosc7
318	chr14	60670600	60670900	300	163.6	3.32723	6.18e-05	1	chip1_peak_453	chr14_60670600_60670900	chr14	60670600	60670900	219140	Spata13
2239	chr1	59222100	59222400	300	163.624	3.32771	0.000522102	1	chip1_peak_3344	chr1_59222100_59222400	chr1	59222100	59222400	74018	Als2
1250	chr1	90790400	90790600	200	163.676	3.32876	0.000287893	1	chip1_peak_1813	chr1_90790400_90790600	chr1	90790400	90790600	12835	Col6a3
4033	chr3	32712600	32712800	200	163.738	3.33002	0.000924211	1	chip1_peak_6246	chr3_32712600_32712800	chr3	32712600	32712800	56456	Actl6a
321	chr6	99188500	99188700	200	163.786	3.33101	6.36e-05	1	chip1_peak_460	chr6_99188500_99188700	chr6	99188500	99188700	108655	Foxp1
4176	chr6	72787300	72787500	200	163.817	3.33162	0.000952493	1	chip1_peak_6473	chr6_72787300_72787500	chr6	72787300	72787500	21415	Tcf7l1
2189	chr7	28896100	28896300	200	163.844	3.33217	0.000511184	1	chip1_peak_3269	chr7_28896100_28896300	chr7	28896100	28896300	60595	Actn4
3141	chr2	55467700	55467900	200	163.896	3.33324	0.000730138	1	chip1_peak_4791	chr2_55467700_55467900	chr2	55467700	55467900	16519	Kcnj3
3825	chr2	34460400	34460600	200	163.94	3.33414	0.000881054	1	chip1_peak_5895	chr2_34460400_34460600	chr2	34460400	34460600	227743	Mapkap1
2970	chr8	64730200	64730400	200	163.958	3.3345	0.000688185	1	chip1_peak_4506	chr8_64730200_64730400	chr8	64730200	64730400	66234	Msmo1
3602	chr5	36111100	36111300	200	164.094	3.33726	0.000828872	1	chip1_peak_5529	chr5_36111100_36111300	chr5	36111100	36111300	81840	Sorcs2
3572	chr3	89735200	89735400	200	164.133	3.33805	0.000823262	1	chip1_peak_5482	chr3_89735200_89735400	chr3	89735200	89735400	56417	Adar
1218	chr9	21667700	21667900	200	164.159	3.33858	0.00027912	1	chip1_peak_1766	chr9_21667700_21667900	chr9	21667700	21667900	20586	Smarca4
3549	chr7	30775200	30775400	200	164.172	3.33884	0.00081744	1	chip1_peak_5445	chr7_30775200_30775400	chr7	30775200	30775400	73712	Dmkn
4315	chr1	91261200	91261400	200	164.204	3.3395	0.000983816	1	chip1_peak_6702	chr1_91261200_91261400	chr1	91261200	91261400	67921	Ube2f
3584	chrX	77531100	77531300	200	164.237	3.34017	0.000825424	1	chip1_peak_5498	chrX_77531100_77531300	chrX	77531100	77531300	21372	Tbl1x
639	chr1	151711100	151711300	200	164.281	3.34106	0.00014196	1	chip1_peak_919	chr1_151711100_151711300	chr1	151711100	151711300	63913	Fam129a
4183	chr4	101184300	101184500	200	164.363	3.34273	0.000954719	1	chip1_peak_6483	chr4_101184300_101184500	chr4	101184300	101184500	16451	Jak1
487	chr11	119716200	119716500	300	164.402	3.34352	9.97e-05	1	chip1_peak_689	chr11_119716200_119716500	chr11	119716200	119716500	74370	Rptor
628	chr4	82390000	82390200	200	164.424	3.34398	0.000138392	1	chip1_peak_899	chr4_82390000_82390200	chr4	82390000	82390200	18028	Nfib
2839	chr15	6465300	6465500	200	164.478	3.34507	0.000659908	1	chip1_peak_4301	chr15_6465300_6465500	chr15	6465300	6465500	26441	Psma4
3818	chr13	23809700	23809900	200	164.544	3.34642	0.000879868	1	chip1_peak_5884	chr13_23809700_23809900	chr13	23809700	23809900	218103	Slc17a2
3819	chr9	62743900	62744100	200	164.544	3.34642	0.000879868	1	chip1_peak_5885	chr9_62743900_62744100	chr9	62743900	62744100	319480	Itga11
3524	chr2	134530800	134531100	300	164.62	3.34797	0.000810359	1	chip1_peak_5400	chr2_134530800_134531100	chr2	134530800	134531100	15112	Hao1
1030	chr2	103668200	103668400	200	164.701	3.34961	0.000230987	1	chip1_peak_1479	chr2_103668200_103668400	chr2	103668200	103668400	99382	Abtb2
1158	chr15	7151700	7151900	200	164.712	3.34983	0.000263153	1	chip1_peak_1674	chr15_7151700_7151900	chr15	7151700	7151900	16880	Lifr
2704	chr7	4886200	4886400	200	164.807	3.35177	0.000628563	1	chip1_peak_4098	chr7_4886200_4886400	chr7	4886200	4886400	664994	Isoc2a
656	chr9	86598200	86598400	200	164.852	3.35269	0.000147084	1	chip1_peak_948	chr9_86598200_86598400	chr9	86598200	86598400	17436	Me1
1466	chr1	152830400	152830700	300	165.115	3.35802	0.00033865	1	chip1_peak_2140	chr1_152830400_152830700	chr1	152830400	152830700	17970	Ncf2
1602	chr19	58292800	58293100	300	165.124	3.35822	0.000369017	1	chip1_peak_2335	chr19_58292800_58293100	chr19	58292800	58293100	14585	Gfra1
4101	chr7	144420900	144421100	200	165.128	3.3583	0.000936242	1	chip1_peak_6354	chr7_144420900_144421100	chr7	144420900	144421100	100499519	Mir3470b
4102	chr7	144420900	144421100	200	165.128	3.3583	0.000936242	1	chip1_peak_6354	chr7_144420900_144421100	chr7	144420900	144421100	210274	Shank2
2010	chr7	49026600	49026800	200	165.145	3.35864	0.000468324	1	chip1_peak_2988	chr7_49026600_49026800	chr7	49026600	49026800	78286	Nav2
937	chr3	94435700	94436000	300	165.148	3.35869	0.000212078	1	chip1_peak_1347	chr3_94435700_94436000	chr3	94435700	94436000	53814	Oaz3
4209	chr16	24438000	24438200	200	165.18	3.35934	0.000961213	1	chip1_peak_6534	chr16_24438000_24438200	chr16	24438000	24438200	210126	Lpp
965	chr2	60272100	60272300	200	165.181	3.35938	0.000216527	1	chip1_peak_1379	chr2_60272100_60272300	chr2	60272100	60272300	66205	Cd302
3912	chr19	47233100	47233300	200	165.205	3.35987	0.000898823	1	chip1_peak_6031	chr19_47233100_47233300	chr19	47233100	47233300	18011	Neurl1a
3647	chr11	75628100	75628300	200	165.213	3.36003	0.000840683	1	chip1_peak_5609	chr11_75628100_75628300	chr11	75628100	75628300	18738	Pitpna
2902	chr16	34110100	34110300	200	165.289	3.36156	0.000672901	1	chip1_peak_4397	chr16_34110100_34110300	chr16	34110100	34110300	545156	Kalrn
1961	chr12	84501700	84501900	200	165.423	3.36429	0.000457486	1	chip1_peak_2910	chr12_84501700_84501900	chr12	84501700	84501900	217708	Lin52
3671	chr16	17013400	17013600	200	165.439	3.36461	0.00084513	1	chip1_peak_5645	chr16_17013400_17013600	chr16	17013400	17013600	26413	Mapk1
509	chr11	76985500	76985700	200	165.673	3.36937	0.000104635	1	chip1_peak_719	chr11_76985500_76985700	chr11	76985500	76985700	104184	Blmh
3994	chr6	114217800	114218000	200	165.747	3.37088	0.000916674	1	chip1_peak_6181	chr6_114217800_114218000	chr6	114217800	114218000	243616	Slc6a11
4298	chrX	60269300	60269500	200	165.75	3.37094	0.000981173	1	chip1_peak_6679	chrX_60269300_60269500	chrX	60269300	60269500	320940	Atp11c
4338	chr1	20107700	20107900	200	165.764	3.37123	0.000989781	1	chip1_peak_6749	chr1_20107700_20107900	chr1	20107700	20107900	241035	Pkhd1
2515	chr16	33965300	33965500	200	165.769	3.37133	0.000588025	1	chip1_peak_3804	chr16_33965300_33965500	chr16	33965300	33965500	22247	Umps
1771	chr2	29654300	29654500	200	165.895	3.37389	0.000409622	1	chip1_peak_2597	chr2_29654300_29654500	chr2	29654300	29654500	107746	Rapgef1
2495	chr9	70687600	70687800	200	165.907	3.37414	0.000585586	1	chip1_peak_3778	chr9_70687600_70687800	chr9	70687600	70687800	11487	Adam10
2314	chr3	148917700	148917900	200	165.917	3.37434	0.000537276	1	chip1_peak_3454	chr3_148917700_148917900	chr3	148917700	148917900	99633	Lphn2
2462	chr10	108382300	108382500	200	165.917	3.37434	0.000576905	1	chip1_peak_3716	chr10_108382300_108382500	chr10	108382300	108382500	114774	Pawr
4249	chr14	121480500	121480700	200	165.932	3.37464	0.000970713	1	chip1_peak_6603	chr14_121480500_121480700	chr14	121480500	121480700	56643	Slc15a1
4271	chr1	133629700	133629900	200	165.984	3.37569	0.000975804	1	chip1_peak_6640	chr1_133629700_133629900	chr1	133629700	133629900	70579	Zc3h11a
3193	chr1	59830100	59830300	200	166.006	3.37615	0.00073985	1	chip1_peak_4869	chr1_59830100_59830300	chr1	59830100	59830300	12168	Bmpr2
847	chr16	30370300	30370600	300	166.074	3.37754	0.000192652	1	chip1_peak_1206	chr16_30370300_30370600	chr16	30370300	30370600	224088	Atp13a3
4229	chr2	27319600	27319800	200	166.084	3.37773	0.000966661	1	chip1_peak_6571	chr2_27319600_27319800	chr2	27319600	27319800	22325	Vav2
1167	chr14	65384100	65384300	200	166.086	3.37777	0.000265748	1	chip1_peak_1687	chr14_65384100_65384300	chr14	65384100	65384300	380912	Zfp395
1873	chr8	77170700	77170900	200	166.169	3.37946	0.000439237	1	chip1_peak_2785	chr8_77170700_77170900	chr8	77170700	77170900	110784	Nr3c2
1456	chr6	115916600	115916900	300	166.252	3.38115	0.000336281	1	chip1_peak_2124	chr6_115916600_115916900	chr6	115916600	115916900	81896	Ift122
3460	chr16	24430400	24430600	200	166.322	3.38258	0.000793507	1	chip1_peak_5288	chr16_24430400_24430600	chr16	24430400	24430600	210126	Lpp
3432	chr11	45933500	45933700	200	166.341	3.38296	0.000788568	1	chip1_peak_5243	chr11_45933500_45933700	chr11	45933500	45933700	72290	Lsm11
3433	chr6	21799400	21799600	200	166.341	3.38296	0.000788568	1	chip1_peak_5244	chr6_21799400_21799600	chr6	21799400	21799600	269831	Tspan12
1022	chr16	30270400	30270700	300	166.35	3.38315	0.000228053	1	chip1_peak_1464	chr16_30270400_30270700	chr16	30270400	30270700	74488	Lrrc15
1600	chr5	145165400	145165600	200	166.4	3.38417	0.000368206	1	chip1_peak_2328	chr5_145165400_145165600	chr5	145165400	145165600	71799	Ptcd1
2999	chr8	108943800	108944100	300	166.415	3.38446	0.00069922	1	chip1_peak_4558	chr8_108943800_108944100	chr8	108943800	108944100	11906	Zfhx3
1299	chr3	30810800	30811000	200	166.439	3.38496	0.000301941	1	chip1_peak_1886	chr3_30810800_30811000	chr3	30810800	30811000	69276	Sec62
1851	chr18	31981000	31981200	200	166.446	3.3851	0.000429076	1	chip1_peak_2737	chr18_31981000_31981200	chr18	31981000	31981200	17922	Myo7b
1698	chr2	160326400	160326600	200	166.454	3.38527	0.000394298	1	chip1_peak_2484	chr2_160326400_160326600	chr2	160326400	160326600	329554	Gm826
3444	chr6	5265200	5265400	200	166.46	3.38539	0.000790418	1	chip1_peak_5264	chr6_5265200_5265400	chr6	5265200	5265400	330260	Pon2
1675	chr10	77265300	77265500	200	166.504	3.38628	0.000389234	1	chip1_peak_2454	chr10_77265300_77265500	chr10	77265300	77265500	80294	Pofut2
3680	chr2	169735100	169735300	200	166.52	3.3866	0.000849904	1	chip1_peak_5669	chr2_169735100_169735300	chr2	169735100	169735300	228911	Tshz2
949	chr7	144641900	144642100	200	166.561	3.38744	0.00021413	1	chip1_peak_1362	chr7_144641900_144642100	chr7	144641900	144642100	101772	Ano1
3394	chr11	109993700	109993900	200	166.583	3.38789	0.000780754	1	chip1_peak_5180	chr11_109993700_109993900	chr11	109993700	109993900	27404	Abca8b
3392	chr14	120926800	120927000	200	166.593	3.38809	0.000780302	1	chip1_peak_5175	chr14_120926800_120927000	chr14	120926800	120927000	70572	Ipo5
3686	chr16	17477700	17477900	200	166.63	3.38883	0.000851573	1	chip1_peak_5681	chr16_17477700_17477900	chr16	17477700	17477900	12929	Crkl
3687	chr2	163638400	163638600	200	166.63	3.38883	0.000851573	1	chip1_peak_5682	chr2_163638400_163638600	chr2	163638400	163638600	26943	Serinc3
446	chr4	97917200	97917600	400	166.65	3.38924	9.11e-05	1	chip1_peak_637	chr4_97917200_97917600	chr4	97917200	97917600	18027	Nfia
2713	chr13	55301400	55301600	200	166.663	3.38952	0.000630029	1	chip1_peak_4110	chr13_55301400_55301600	chr13	55301400	55301600	18193	Nsd1
213	chr2	90577900	90578100	200	166.691	3.39008	3.85e-05	1	chip1_peak_306	chr2_90577900_90578100	chr2	90577900	90578100	19271	Ptprj
1502	chr16	32438900	32439100	200	166.74	3.39107	0.000346447	1	chip1_peak_2190	chr16_32438900_32439100	chr16	32438900	32439100	13026	Pcyt1a
3660	chr12	85633800	85634000	200	166.808	3.39246	0.000842509	1	chip1_peak_5626	chr12_85633800_85634000	chr12	85633800	85634000	81703	Jdp2
3350	chr3	145927500	145927700	200	166.812	3.39254	0.0007737	1	chip1_peak_5115	chr3_145927500_145927700	chr3	145927500	145927700	12042	Bcl10
1960	chr5	139536100	139536300	200	166.819	3.39269	0.000457473	1	chip1_peak_2909	chr5_139536100_139536300	chr5	139536100	139536300	74973	4930500L23Rik
3000	chr11	118783200	118783400	200	166.846	3.39323	0.00069926	1	chip1_peak_4559	chr11_118783200_118783400	chr11	118783200	118783400	52897	Rbfox3
1499	chr9	32507300	32507500	200	166.894	3.39421	0.000346234	1	chip1_peak_2186	chr9_32507300_32507500	chr9	32507300	32507500	14247	Fli1
3289	chr6	83438100	83438300	200	166.972	3.39579	0.00075884	1	chip1_peak_5014	chr6_83438100_83438300	chr6	83438100	83438300	194388	Tet3
3621	chr2	167016300	167016500	200	167.055	3.39749	0.000834152	1	chip1_peak_5564	chr2_167016300_167016500	chr2	167016300	167016500	228889	Ddx27
3297	chr6	51549100	51549300	200	167.092	3.39824	0.000760619	1	chip1_peak_5029	chr6_51549100_51549300	chr6	51549100	51549300	71982	Snx10
3298	chr1	62376100	62376300	200	167.092	3.39824	0.000760619	1	chip1_peak_5030	chr1_62376100_62376300	chr1	62376100	62376300	72823	Pard3b
1614	chr4	95848600	95848800	200	167.096	3.39831	0.00037205	1	chip1_peak_2353	chr4_95848600_95848800	chr4	95848600	95848800	75578	Fggy
3212	chr12	5173100	5173300	200	167.155	3.39951	0.0007441	1	chip1_peak_4896	chr12_5173100_5173300	chr12	5173100	5173300	208439	Klhl29
2302	chr17	83600600	83600800	200	167.166	3.39975	0.000535881	1	chip1_peak_3439	chr17_83600600_83600800	chr17	83600600	83600800	225030	Kcng3
1776	chr9	62772400	62772700	300	167.203	3.40048	0.000410834	1	chip1_peak_2605	chr9_62772400_62772700	chr9	62772400	62772700	319480	Itga11
1622	chr15	10214100	10214300	200	167.301	3.40249	0.000373997	1	chip1_peak_2365	chr15_10214100_10214300	chr15	10214100	10214300	19116	Prlr
1	chr15	59315800	59318000	2200	167.304	3.40254	1.38e-17	1.88e-10	chip1_peak_1	chr15_59315800_59318000	chr15	59315800	59318000	20775	Sqle
269	chr7	140106200	140106400	200	167.358	3.40365	4.94e-05	1	chip1_peak_379	chr7_140106200_140106400	chr7	140106200	140106400	93747	Echs1
3926	chr19	30038200	30038400	200	167.362	3.40373	0.000900846	1	chip1_peak_6055	chr19_30038200_30038400	chr19	30038200	30038400	109113	Uhrf2
1221	chr15	66930900	66931100	200	167.373	3.40394	0.000281019	1	chip1_peak_1772	chr15_66930900_66931100	chr15	66930900	66931100	17988	Ndrg1
1374	chr7	74371900	74372100	200	167.393	3.40436	0.000318703	1	chip1_peak_2003	chr7_74371900_74372100	chr7	74371900	74372100	108116	Slco3a1
2903	chr13	105220800	105221000	200	167.467	3.40585	0.000672935	1	chip1_peak_4399	chr13_105220800_105221000	chr13	105220800	105221000	71816	Rnf180
2026	chr6	88837300	88837500	200	167.52	3.40694	0.000472757	1	chip1_peak_3016	chr6_88837300_88837500	chr6	88837300	88837500	80283	Abtb1
2556	chr2	5575000	5575300	300	167.591	3.40838	0.000595085	1	chip1_peak_3865	chr2_5575000_5575300	chr2	5575000	5575300	227541	Camk1d
4260	chr12	82924200	82924400	200	167.599	3.40854	0.000972803	1	chip1_peak_6623	chr12_82924200_82924400	chr12	82924200	82924400	50779	Rgs6
4261	chr2	77741000	77741200	200	167.599	3.40854	0.000972803	1	chip1_peak_6624	chr2_77741000_77741200	chr2	77741000	77741200	241494	Zfp385b
1886	chr6	28563100	28563400	300	167.62	3.40898	0.000442771	1	chip1_peak_2805	chr6_28563100_28563400	chr6	28563100	28563400	56463	Snd1
3684	chr2	149405200	149405400	200	167.628	3.40915	0.00085117	1	chip1_peak_5678	chr2_149405200_149405400	chr2	149405200	149405400	58214	Cst10
3685	chr11	83316600	83316800	200	167.787	3.41238	0.000851474	1	chip1_peak_5680	chr11_83316600_83316800	chr11	83316600	83316800	71770	Ap2b1
3087	chr1	62810700	62810900	200	167.814	3.41292	0.00071738	1	chip1_peak_4701	chr1_62810700_62810900	chr1	62810700	62810900	18187	Nrp2
1331	chr4	155195600	155195800	200	167.819	3.41301	0.000309732	1	chip1_peak_1933	chr4_155195600_155195800	chr4	155195600	155195800	20481	Ski
4091	chr10	128029300	128029500	200	167.871	3.41407	0.000934747	1	chip1_peak_6340	chr10_128029300_128029500	chr10	128029300	128029500	19075	Prim1
4084	chr17	87345200	87345400	200	167.906	3.41479	0.000934236	1	chip1_peak_6330	chr17_87345200_87345400	chr17	87345200	87345400	225049	Ttc7
3431	chr13	56117900	56118100	200	167.913	3.41494	0.000788522	1	chip1_peak_5242	chr13_56117900_56118100	chr13	56117900	56118100	26914	H2afy
3430	chr13	58062000	58062200	200	167.923	3.41514	0.000788307	1	chip1_peak_5240	chr13_58062000_58062200	chr13	58062000	58062200	100503085	Klhl3
2800	chr11	50287300	50287500	200	167.931	3.4153	0.000650489	1	chip1_peak_4241	chr11_50287300_50287500	chr11	50287300	50287500	103806	Maml1
2201	chr2	164779300	164779500	200	167.933	3.41535	0.000514029	1	chip1_peak_3285	chr2_164779300_164779500	chr2	164779300	164779500	21925	Tnnc2
168	chr8	95341000	95341400	400	168.077	3.41826	2.69e-05	0.970199	chip1_peak_247	chr8_95341000_95341400	chr8	95341000	95341400	101985	Usb1
3085	chr5	73080000	73080200	200	168.085	3.41843	0.000716066	1	chip1_peak_4697	chr5_73080000_73080200	chr5	73080000	73080200	72313	Fryl
1494	chr9	64940800	64941000	200	168.212	3.42102	0.000344753	1	chip1_peak_2178	chr9_64940800_64941000	chr9	64940800	64941000	214111	Slc24a1
1643	chr19	60824700	60824900	200	168.221	3.4212	0.000380823	1	chip1_peak_2405	chr19_60824700_60824900	chr19	60824700	60824900	67894	Fam45a
389	chr16	97816000	97816300	300	168.257	3.42194	8.02e-05	1	chip1_peak_556	chr16_97816000_97816300	chr16	97816000	97816300	114604	Prdm15
710	chr1	180384300	180384600	300	168.316	3.42312	0.000162662	1	chip1_peak_1025	chr1_180384300_180384600	chr1	180384300	180384600	320404	Itpkb
593	chr13	9170700	9171100	400	168.348	3.42377	0.000131809	1	chip1_peak_854	chr13_9170700_9171100	chr13	9170700	9171100	217980	Larp4b
1634	chr19	32172600	32172800	200	168.405	3.42494	0.000376673	1	chip1_peak_2386	chr19_32172600_32172800	chr19	32172600	32172800	208449	Sgms1
3633	chr3	118625400	118625600	200	168.454	3.42594	0.000836743	1	chip1_peak_5581	chr3_118625400_118625600	chr3	118625400	118625600	99586	Dpyd
3314	chr1	72604000	72604200	200	168.458	3.42602	0.000763187	1	chip1_peak_5052	chr1_72604000_72604200	chr1	72604000	72604200	54380	Smarcal1
1471	chr7	107528900	107529100	200	168.508	3.42703	0.000339517	1	chip1_peak_2149	chr7_107528900_107529100	chr7	107528900	107529100	100316820	Mir1970
1472	chr7	107528900	107529100	200	168.508	3.42703	0.000339517	1	chip1_peak_2149	chr7_107528900_107529100	chr7	107528900	107529100	60510	Syt9
1340	chr1	106387900	106388100	200	168.554	3.42798	0.000311818	1	chip1_peak_1952	chr1_106387900_106388100	chr1	106387900	106388100	98432	Phlpp1
720	chr13	74323200	74323400	200	168.557	3.42804	0.000165424	1	chip1_peak_1041	chr13_74323200_74323400	chr13	74323200	74323400	66945	Sdha
985	chr6	99041200	99041400	200	168.566	3.42822	0.000220917	1	chip1_peak_1408	chr6_99041200_99041400	chr6	99041200	99041400	108655	Foxp1
4242	chr19	40697800	40698000	200	168.626	3.42943	0.000969628	1	chip1_peak_6592	chr19_40697800_40698000	chr19	40697800	40698000	12495	Entpd1
2086	chr3	122466800	122467000	200	168.651	3.42995	0.000488442	1	chip1_peak_3109	chr3_122466800_122467000	chr3	122466800	122467000	29815	Bcar3
3032	chr1	189729500	189729700	200	168.691	3.43075	0.000704407	1	chip1_peak_4603	chr1_189729500_189729700	chr1	189729500	189729700	19250	Ptpn14
4309	chr10	116912700	116912900	200	168.699	3.43091	0.000983003	1	chip1_peak_6694	chr10_116912700_116912900	chr10	116912700	116912900	216363	Rab3ip
3570	chr2	69332700	69332900	200	168.734	3.43163	0.0008228	1	chip1_peak_5477	chr2_69332700_69332900	chr2	69332700	69332900	27413	Abcb11
3604	chr5	146220400	146220600	200	168.754	3.43203	0.000830001	1	chip1_peak_5536	chr5_146220400_146220600	chr5	146220400	146220600	74132	Rnf6
3275	chr1	188808500	188808700	200	168.762	3.43221	0.000756839	1	chip1_peak_4994	chr1_188808500_188808700	chr1	188808500	188808700	22283	Ush2a
3579	chr5	146749500	146749700	200	168.78	3.43257	0.000824606	1	chip1_peak_5491	chr5_146749500_146749700	chr5	146749500	146749700	22217	Usp12
3580	chr2	163875600	163875800	200	168.78	3.43257	0.000824606	1	chip1_peak_5493	chr2_163875600_163875800	chr2	163875600	163875800	241770	Rims4
1410	chr2	58540200	58540500	300	168.877	3.43453	0.000325746	1	chip1_peak_2053	chr2_58540200_58540500	chr2	58540200	58540500	11477	Acvr1
580	chr10	94800400	94800600	200	168.888	3.43477	0.000127605	1	chip1_peak_835	chr10_94800400_94800600	chr10	94800400	94800600	54712	Plxnc1
4026	chr2	92397000	92397200	200	168.899	3.43498	0.000923035	1	chip1_peak_6234	chr2_92397000_92397200	chr2	92397000	92397200	19099	Mapk8ip1
3919	chr2	134595600	134595800	200	168.939	3.4358	0.000900112	1	chip1_peak_6044	chr2_134595600_134595800	chr2	134595600	134595800	52837	Tmx4
1797	chr5	30667800	30668000	200	168.968	3.43638	0.000414243	1	chip1_peak_2639	chr5_30667800_30668000	chr5	30667800	30668000	12615	Cenpa
505	chr6	113474200	113474500	300	169.104	3.43916	0.000104502	1	chip1_peak_714	chr6_113474200_113474500	chr6	113474200	113474500	171095	Il17rc
322	chr5	117505600	117505900	300	169.109	3.43926	6.36e-05	1	chip1_peak_462	chr5_117505600_117505900	chr5	117505600	117505900	333050	Ksr2
2613	chr16	36940900	36941100	200	169.2	3.4411	0.000607367	1	chip1_peak_3951	chr16_36940900_36941100	chr16	36940900	36941100	15163	Hcls1
1673	chr3	19291900	19292100	200	169.27	3.44254	0.000388892	1	chip1_peak_2450	chr3_19291900_19292100	chr3	19291900	19292100	18583	Pde7a
2832	chr2	64945100	64945300	200	169.374	3.44464	0.000658841	1	chip1_peak_4292	chr2_64945100_64945300	chr2	64945100	64945300	50915	Grb14
3475	chr2	33173100	33173300	200	169.407	3.44533	0.000798671	1	chip1_peak_5321	chr2_33173100_33173300	chr2	33173100	33173300	241308	Ralgps1
3111	chr13	114131100	114131300	200	169.431	3.44581	0.000723577	1	chip1_peak_4744	chr13_114131100_114131300	chr13	114131100	114131300	218639	Arl15
3112	chr13	114131100	114131300	200	169.431	3.44581	0.000723577	1	chip1_peak_4744	chr13_114131100_114131300	chr13	114131100	114131300	319803	A430090L17Rik
2129	chr11	83751900	83752200	300	169.453	3.44626	0.000498385	1	chip1_peak_3179	chr11_83751900_83752200	chr11	83751900	83752200	66107	Wfdc21
1040	chr1	23917600	23917800	200	169.516	3.44753	0.000233517	1	chip1_peak_1495	chr1_23917600_23917800	chr1	23917600	23917800	98366	Smap1
1932	chr8	25679000	25679200	200	169.784	3.45298	0.000452042	1	chip1_peak_2871	chr8_25679000_25679200	chr8	25679000	25679200	234135	Whsc1l1
2782	chr18	35120200	35120400	200	169.86	3.45453	0.000646059	1	chip1_peak_4213	chr18_35120200_35120400	chr18	35120200	35120400	12385	Ctnna1
900	chr2	6383000	6383200	200	169.89	3.45514	0.000201684	1	chip1_peak_1280	chr2_6383000_6383200	chr2	6383000	6383200	98910	Usp6nl
2985	chr2	5624700	5624900	200	169.956	3.45647	0.000694283	1	chip1_peak_4533	chr2_5624700_5624900	chr2	5624700	5624900	227541	Camk1d
2109	chr10	80993200	80993400	200	169.965	3.45667	0.000494173	1	chip1_peak_3147	chr10_80993200_80993400	chr10	80993200	80993400	14708	Gng7
1617	chr4	12050000	12050200	200	169.984	3.45705	0.000372789	1	chip1_peak_2357	chr4_12050000_12050200	chr4	12050000	12050200	329795	Tmem67
839	chr11	120427400	120427700	300	170.059	3.45858	0.000190816	1	chip1_peak_1195	chr11_120427400_120427700	chr11	120427400	120427700	217365	Nploc4
3319	chr4	136701500	136701700	200	170.087	3.45915	0.000763543	1	chip1_peak_5057	chr4_136701500_136701700	chr4	136701500	136701700	13844	Ephb2
418	chr16	34037500	34037800	300	170.143	3.46029	8.49e-05	1	chip1_peak_596	chr16_34037500_34037800	chr16	34037500	34037800	545156	Kalrn
429	chr13	96666200	96666400	200	170.181	3.46105	8.71e-05	1	chip1_peak_613	chr13_96666200_96666400	chr13	96666200	96666400	15357	Hmgcr
955	chr3	119028500	119028700	200	170.222	3.4619	0.000214771	1	chip1_peak_1368	chr3_119028500_119028700	chr3	119028500	119028700	99586	Dpyd
3266	chr11	114870100	114870300	200	170.279	3.46304	0.000754983	1	chip1_peak_4983	chr11_114870100_114870300	chr11	114870100	114870300	70355	Gprc5c
1775	chr17	78966800	78967100	300	170.29	3.46327	0.00041056	1	chip1_peak_2604	chr17_78966800_78967100	chr17	78966800	78967100	75292	Prkd3
3375	chr12	108495800	108496000	200	170.304	3.46357	0.000777998	1	chip1_peak_5153	chr12_108495800_108496000	chr12	108495800	108496000	68519	Eml1
3251	chr4	101181300	101181500	200	170.435	3.46622	0.000751835	1	chip1_peak_4958	chr4_101181300_101181500	chr4	101181300	101181500	16451	Jak1
3359	chr9	110834700	110834900	200	170.46	3.46674	0.000775053	1	chip1_peak_5130	chr9_110834700_110834900	chr9	110834700	110834900	260408	Prss45
1714	chr1	170213500	170213700	200	170.469	3.46691	0.000398049	1	chip1_peak_2510	chr1_170213500_170213700	chr1	170213500	170213700	16589	Uhmk1
627	chr14	50836300	50836600	300	170.713	3.47188	0.000138173	1	chip1_peak_898	chr14_50836300_50836600	chr14	50836300	50836600	21745	Tep1
2844	chr12	85256200	85256400	200	170.775	3.47314	0.000661031	1	chip1_peak_4306	chr12_85256200_85256400	chr12	85256200	85256400	217716	Mlh3
1372	chr8	12863500	12863700	200	170.837	3.4744	0.000317882	1	chip1_peak_1997	chr8_12863500_12863700	chr8	12863500	12863700	50770	Atp11a
3151	chr1	156050400	156050600	200	170.907	3.47582	0.000731257	1	chip1_peak_4805	chr1_156050400_156050600	chr1	156050400	156050600	240832	Tor1aip2
1786	chr14	121263300	121263500	200	170.912	3.47592	0.00041279	1	chip1_peak_2618	chr14_121263300_121263500	chr14	121263300	121263500	223254	Farp1
1826	chr16	34079100	34079300	200	170.993	3.47756	0.000422297	1	chip1_peak_2692	chr16_34079100_34079300	chr16	34079100	34079300	545156	Kalrn
736	chr15	10614300	10614500	200	171.012	3.47795	0.000168668	1	chip1_peak_1063	chr15_10614300_10614500	chr15	10614300	10614500	75646	Rai14
1148	chr17	86285800	86286000	200	171.028	3.47829	0.000260576	1	chip1_peak_1656	chr17_86285800_86286000	chr17	86285800	86286000	18754	Prkce
1149	chr17	86285800	86286000	200	171.028	3.47829	0.000260576	1	chip1_peak_1656	chr17_86285800_86286000	chr17	86285800	86286000	72104	2010106C02Rik
1941	chr6	125054400	125054600	200	171.05	3.47873	0.000454095	1	chip1_peak_2884	chr6_125054400_125054600	chr6	125054400	125054600	54137	Acrbp
2101	chr9	69991200	69991400	200	171.083	3.4794	0.000491619	1	chip1_peak_3130	chr9_69991200_69991400	chr9	69991200	69991400	12175	Bnip2
2801	chr8	124723300	124723500	200	171.117	3.4801	0.00065111	1	chip1_peak_4244	chr8_124723300_124723500	chr8	124723300	124723500	68865	Arv1
3074	chr4	141918800	141919000	200	171.148	3.48073	0.000713708	1	chip1_peak_4683	chr4_141918800_141919000	chr4	141918800	141919000	329977	Fhad1
608	chr16	34823500	34823800	300	171.182	3.48142	0.000135573	1	chip1_peak_877	chr16_34823500_34823800	chr16	34823500	34823800	107589	Mylk
152	chr16	30517100	30517400	300	171.186	3.4815	2.38e-05	0.930372	chip1_peak_223	chr16_30517100_30517400	chr16	30517100	30517400	224090	Tmem44
2504	chr16	92448300	92448500	200	171.206	3.4819	0.000586462	1	chip1_peak_3791	chr16_92448300_92448500	chr16	92448300	92448500	54720	Rcan1
2505	chr1	58042200	58042400	200	171.206	3.4819	0.000586462	1	chip1_peak_3792	chr1_58042200_58042400	chr1	58042200	58042400	11761	Aox1
2767	chr16	13796600	13796800	200	171.238	3.48255	0.000642966	1	chip1_peak_4190	chr16_13796600_13796800	chr16	13796600	13796800	106298	Rrn3
612	chr9	35172500	35172700	200	171.246	3.48272	0.000135706	1	chip1_peak_881	chr9_35172500_35172700	chr9	35172500	35172700	69305	Dcps
1078	chr2	165786900	165787200	300	171.247	3.48273	0.000242555	1	chip1_peak_1551	chr2_165786900_165787200	chr2	165786900	165787200	228880	Zmynd8
3478	chr3	148910700	148910900	200	171.267	3.48315	0.000799005	1	chip1_peak_5324	chr3_148910700_148910900	chr3	148910700	148910900	99633	Lphn2
3384	chr10	68532500	68532700	200	171.34	3.48463	0.00077938	1	chip1_peak_5165	chr10_68532500_68532700	chr10	68532500	68532700	73287	1700040L02Rik
2755	chr5	118142800	118143000	200	171.392	3.48569	0.000640289	1	chip1_peak_4171	chr5_118142800_118143000	chr5	118142800	118143000	231672	Fbxw8
1896	chr17	30332200	30332500	300	171.399	3.48582	0.000445257	1	chip1_peak_2821	chr17_30332200_30332500	chr17	30332200	30332500	224671	Btbd9
1152	chr19	40224600	40224800	200	171.404	3.48593	0.000260738	1	chip1_peak_1659	chr19_40224600_40224800	chr19	40224600	40224800	54132	Pdlim1
456	chr4	104770700	104770900	200	171.524	3.48838	9.37e-05	1	chip1_peak_653	chr4_104770700_104770900	chr4	104770700	104770900	110382	C8b
3267	chr9	70768700	70768900	200	171.685	3.49165	0.000755305	1	chip1_peak_4984	chr9_70768700_70768900	chr9	70768700	70768900	11487	Adam10
2698	chr13	95685300	95685500	200	171.749	3.49295	0.000626766	1	chip1_peak_4085	chr13_95685300_95685500	chr13	95685300	95685500	544963	Iqgap2
2222	chr15	86398400	86398600	200	171.763	3.49323	0.000518529	1	chip1_peak_3319	chr15_86398400_86398600	chr15	86398400	86398600	223754	Tbc1d22a
2960	chr13	74173300	74173500	200	171.811	3.49421	0.00068662	1	chip1_peak_4492	chr13_74173300_74173500	chr13	74173300	74173500	211446	Exoc3
822	chr3	153668900	153669200	300	171.821	3.4944	0.000187074	1	chip1_peak_1175	chr3_153668900_153669200	chr3	153668900	153669200	20447	St6galnac3
1089	chr4	141163700	141163900	200	171.873	3.49548	0.000247057	1	chip1_peak_1571	chr4_141163700_141163900	chr4	141163700	141163900	213499	Fbxo42
4161	chr17	35862000	35862200	200	171.914	3.4963	0.000949915	1	chip1_peak_6451	chr17_35862000_35862200	chr17	35862000	35862200	106582	Nrm
2955	chr12	102693100	102693300	200	171.949	3.49701	0.00068434	1	chip1_peak_4478	chr12_102693100_102693300	chr12	102693100	102693300	217837	Itpk1
1278	chr16	11384700	11384900	200	172.023	3.49851	0.000295046	1	chip1_peak_1853	chr16_11384700_11384900	chr16	11384700	11384900	74478	Snx29
376	chr15	99086600	99086900	300	172.03	3.49866	7.8e-05	1	chip1_peak_539	chr15_99086600_99086900	chr15	99086600	99086900	239659	C1ql4
4022	chr8	18647800	18648000	200	172.079	3.49966	0.000922323	1	chip1_peak_6228	chr8_18647800_18648000	chr8	18647800	18648000	244329	Mcph1
2219	chr5	137789100	137789400	300	172.228	3.50268	0.000517798	1	chip1_peak_3313	chr5_137789100_137789400	chr5	137789100	137789400	381678	Zcwpw1
1175	chr2	124650800	124651100	300	172.247	3.50308	0.000267481	1	chip1_peak_1704	chr2_124650800_124651100	chr2	124650800	124651100	214968	Sema6d
541	chr14	121369200	121369500	300	172.276	3.50366	0.000116149	1	chip1_peak_774	chr14_121369200_121369500	chr14	121369200	121369500	223255	Stk24
2882	chr4	136694800	136695000	200	172.322	3.5046	0.000669486	1	chip1_peak_4362	chr4_136694800_136695000	chr4	136694800	136695000	13844	Ephb2
2708	chr2	69296100	69296400	300	172.457	3.50735	0.000629067	1	chip1_peak_4103	chr2_69296100_69296400	chr2	69296100	69296400	27413	Abcb11
2905	chr17	46464900	46465100	200	172.504	3.5083	0.000673686	1	chip1_peak_4402	chr17_46464900_46465100	chr17	46464900	46465100	140810	Ttbk2
1368	chr4	126849200	126849400	200	172.512	3.50846	0.000317024	1	chip1_peak_1992	chr4_126849200_126849400	chr4	126849200	126849400	100317	AU040320
2660	chr2	58487400	58487600	200	172.542	3.50907	0.000618716	1	chip1_peak_4022	chr2_58487400_58487600	chr2	58487400	58487600	11477	Acvr1
3345	chr8	78574000	78574300	300	172.543	3.5091	0.000772493	1	chip1_peak_5108	chr8_78574000_78574300	chr8	78574000	78574300	76775	Slc10a7
2254	chr10	75640400	75640700	300	172.596	3.51018	0.000524951	1	chip1_peak_3366	chr10_75640400_75640700	chr10	75640400	75640700	71733	Susd2
2827	chr18	11046900	11047100	200	172.612	3.5105	0.000658175	1	chip1_peak_4286	chr18_11046900_11047100	chr18	11046900	11047100	68434	1010001N08Rik
717	chr2	155849300	155849500	200	172.618	3.51063	0.000163861	1	chip1_peak_1036	chr2_155849300_155849500	chr2	155849300	155849500	56046	Uqcc1
2355	chr11	119170900	119171100	200	172.646	3.51118	0.000545642	1	chip1_peak_3521	chr11_119170900_119171100	chr11	119170900	119171100	207592	Tbc1d16
3445	chr7	126065500	126065700	200	172.662	3.51152	0.000790611	1	chip1_peak_5265	chr7_126065500_126065700	chr7	126065500	126065700	269994	Gsg1l
520	chr4	140559500	140559800	300	172.716	3.51262	0.000107138	1	chip1_peak_736	chr4_140559500_140559800	chr4	140559500	140559800	72754	Arhgef10l
2070	chr9	107802300	107802500	200	172.723	3.51275	0.000483922	1	chip1_peak_3082	chr9_107802300_107802500	chr9	107802300	107802500	19654	Rbm6
2530	chr19	41033200	41033400	200	172.758	3.51346	0.000590103	1	chip1_peak_3829	chr19_41033200_41033400	chr19	41033200	41033400	21673	Dntt
2797	chr13	112546200	112546500	300	172.771	3.51374	0.000649161	1	chip1_peak_4234	chr13_112546200_112546500	chr13	112546200	112546500	218624	Il31ra
2511	chr9	45153500	45153700	200	172.913	3.51663	0.000587648	1	chip1_peak_3800	chr9_45153500_45153700	chr9	45153500	45153700	399548	Scn4b
3161	chr15	35886200	35886400	200	172.916	3.51669	0.000732646	1	chip1_peak_4817	chr15_35886200_35886400	chr15	35886200	35886400	666173	Vps13b
525	chr8	127105700	127106000	300	172.957	3.51751	0.000108788	1	chip1_peak_742	chr8_127105700_127106000	chr8	127105700	127106000	93742	Pard3
2649	chr1	59693600	59693900	300	172.993	3.51824	0.000616798	1	chip1_peak_4005	chr1_59693600_59693900	chr1	59693600	59693900	55989	Nop58
2247	chr17	24333000	24333300	300	172.998	3.51836	0.000523642	1	chip1_peak_3357	chr17_24333000_24333300	chr17	24333000	24333300	381072	Abca17
4128	chr9	122186800	122187000	200	173.049	3.51938	0.000942039	1	chip1_peak_6392	chr9_122186800_122187000	chr9	122186800	122187000	102566	Ano10
1437	chr2	27457000	27457200	200	173.167	3.52179	0.00033221	1	chip1_peak_2095	chr2_27457000_27457200	chr2	27457000	27457200	67382	Brd3
2007	chr2	103642800	103643000	200	173.182	3.5221	0.000467828	1	chip1_peak_2985	chr2_103642800_103643000	chr2	103642800	103643000	99382	Abtb2
1292	chr18	12452100	12452300	200	173.216	3.52278	0.000299545	1	chip1_peak_1873	chr18_12452100_12452300	chr18	12452100	12452300	16774	Lama3
2838	chr5	35027700	35027900	200	173.223	3.52293	0.000659886	1	chip1_peak_4300	chr5_35027700_35027900	chr5	35027700	35027900	71729	Rgs12
2996	chr15	89131500	89131700	200	173.234	3.52315	0.0006985	1	chip1_peak_4554	chr15_89131500_89131700	chr15	89131500	89131700	29857	Mapk12
3709	chr10	117681800	117682000	200	173.248	3.52344	0.000856541	1	chip1_peak_5713	chr10_117681800_117682000	chr10	117681800	117682000	70574	Cpm
1900	chr1	165652400	165652600	200	173.324	3.52498	0.000446851	1	chip1_peak_2827	chr1_165652400_165652600	chr1	165652400	165652600	226594	Rcsd1
3312	chr13	47176800	47177000	200	173.349	3.52548	0.000763039	1	chip1_peak_5050	chr13_47176800_47177000	chr13	47176800	47177000	218215	Rnf144b
2135	chr17	57313700	57314000	300	173.39	3.52632	0.000500689	1	chip1_peak_3186	chr17_57313700_57314000	chr17	57313700	57314000	22324	Vav1
980	chr12	99219300	99219500	200	173.597	3.53054	0.000219387	1	chip1_peak_1400	chr12_99219300_99219500	chr12	99219300	99219500	71375	Foxn3
2685	chr11	84361000	84361200	200	173.606	3.53072	0.00062405	1	chip1_peak_4064	chr11_84361000_84361200	chr11	84361000	84361200	107476	Acaca
4327	chr2	6398300	6398500	200	173.632	3.53125	0.000986945	1	chip1_peak_6724	chr2_6398300_6398500	chr2	6398300	6398500	98910	Usp6nl
4291	chr14	57921300	57921500	200	173.657	3.53175	0.000980513	1	chip1_peak_6671	chr14_57921300_57921500	chr14	57921300	57921500	68514	Micu2
1981	chr7	25286600	25286800	200	173.684	3.53229	0.000463032	1	chip1_peak_2946	chr7_25286600_25286800	chr7	25286600	25286800	71722	Cic
112	chr1	155782700	155783000	300	173.769	3.53404	1.52e-05	0.77254	chip1_peak_166	chr1_155782700_155783000	chr1	155782700	155783000	104009	Qsox1
2275	chr13	8889700	8890000	300	173.803	3.53471	0.000529529	1	chip1_peak_3396	chr13_8889700_8890000	chr13	8889700	8890000	319554	Idi1
4273	chr8	110163300	110163500	200	173.83	3.53528	0.000976406	1	chip1_peak_6644	chr8_110163300_110163500	chr8	110163300	110163500	12308	Calb2
2298	chr5	64275900	64276200	300	173.834	3.53535	0.000534726	1	chip1_peak_3432	chr5_64275900_64276200	chr5	64275900	64276200	57915	Tbc1d1
4244	chr2	166961400	166961600	200	173.855	3.53577	0.000970043	1	chip1_peak_6597	chr2_166961400_166961600	chr2	166961400	166961600	20853	Stau1
3009	chr15	81391200	81391400	200	173.856	3.53581	0.000700872	1	chip1_peak_4571	chr15_81391200_81391400	chr15	81391200	81391400	70356	St13
1506	chr11	103171100	103171300	200	173.907	3.53683	0.000348486	1	chip1_peak_2202	chr11_103171100_103171300	chr11	103171100	103171300	57778	Fmnl1
4167	chr14	54507500	54507700	200	174.032	3.53938	0.000951085	1	chip1_peak_6460	chr14_54507500_54507700	chr14	54507500	54507700	27374	Prmt5
4142	chr4	154381300	154381500	200	174.056	3.53986	0.000944891	1	chip1_peak_6418	chr4_154381300_154381500	chr4	154381300	154381500	70673	Prdm16
2864	chr19	56328500	56328700	200	174.084	3.54043	0.000665029	1	chip1_peak_4337	chr19_56328500_56328700	chr19	56328500	56328700	230082	Nol6
2734	chr1	78669900	78670100	200	174.089	3.54053	0.000635134	1	chip1_peak_4141	chr1_78669900_78670100	chr1	78669900	78670100	74205	Acsl3
1334	chr19	4871100	4871300	200	174.107	3.5409	0.000310893	1	chip1_peak_1940	chr19_4871100_4871300	chr19	4871100	4871300	11474	Actn3
2461	chr8	91581900	91582100	200	174.251	3.54383	0.000576837	1	chip1_peak_3714	chr8_91581900_91582100	chr8	91581900	91582100	26383	Fto
1560	chr17	32251700	32252000	300	174.291	3.54464	0.000359263	1	chip1_peak_2275	chr17_32251700_32252000	chr17	32251700	32252000	57261	Brd4
368	chr11	59409500	59409700	200	174.3	3.54484	7.57e-05	1	chip1_peak_529	chr11_59409500_59409700	chr11	59409500	59409700	67826	Snap47
2322	chr4	125102700	125102900	200	174.377	3.54639	0.00053851	1	chip1_peak_3464	chr4_125102700_125102900	chr4	125102700	125102900	70088	Meaf6
1887	chr11	106895300	106895500	200	174.408	3.54703	0.000442848	1	chip1_peak_2806	chr11_106895300_106895500	chr11	106895300	106895500	66313	Smurf2
1457	chr1	164435600	164435800	200	174.624	3.55141	0.000336309	1	chip1_peak_2125	chr1_164435600_164435800	chr1	164435600	164435800	171567	Nme7
233	chr10	61484500	61484800	300	174.631	3.55156	4.16e-05	1	chip1_peak_328	chr10_61484500_61484800	chr10	61484500	61484800	216011	Lrrc20
2510	chr2	59710900	59711100	200	174.634	3.55161	0.000587542	1	chip1_peak_3799	chr2_59710900_59711100	chr2	59710900	59711100	66860	Tanc1
1008	chr18	11838700	11838900	200	174.676	3.55247	0.000225442	1	chip1_peak_1442	chr18_11838700_11838900	chr18	11838700	11838900	621998	Gm6277
1973	chr2	6358600	6358900	300	174.721	3.55339	0.000460519	1	chip1_peak_2929	chr2_6358600_6358900	chr2	6358600	6358900	98910	Usp6nl
3979	chr2	166129100	166129300	200	174.749	3.55396	0.000913991	1	chip1_peak_6159	chr2_166129100_166129300	chr2	166129100	166129300	72043	Sulf2
1230	chr16	24875900	24876100	200	174.752	3.55402	0.000283226	1	chip1_peak_1785	chr16_24875900_24876100	chr16	24875900	24876100	210126	Lpp
335	chr15	77280400	77280600	200	174.811	3.55522	6.68e-05	1	chip1_peak_484	chr15_77280400_77280600	chr15	77280400	77280600	93686	Rbfox2
2445	chr7	97714700	97714900	200	174.813	3.55526	0.000573679	1	chip1_peak_3692	chr7_97714700_97714900	chr7	97714700	97714900	12729	Clns1a
2811	chr14	37062100	37062300	200	174.837	3.55575	0.000652402	1	chip1_peak_4255	chr14_37062100_37062300	chr14	37062100	37062300	239037	Lrit1
43	chr5	125154400	125154800	400	174.85	3.55601	1.89e-06	0.255097	chip1_peak_57	chr5_125154400_125154800	chr5	125154400	125154800	20602	Ncor2
1179	chr4	53020100	53020300	200	174.866	3.55633	0.000268609	1	chip1_peak_1710	chr4_53020100_53020300	chr4	53020100	53020300	66536	Nipsnap3b
4313	chr4	41547000	41547200	200	174.926	3.55756	0.000983715	1	chip1_peak_6700	chr4_41547000_41547200	chr4	41547000	41547200	71901	Fam219a
3554	chr10	111288200	111288400	200	175.1	3.5611	0.000818427	1	chip1_peak_5453	chr10_111288200_111288400	chr10	111288200	111288400	237542	Osbpl8
2418	chr4	103189000	103189200	200	175.148	3.56207	0.000564128	1	chip1_peak_3635	chr4_103189000_103189200	chr4	103189000	103189200	242585	Slc35d1
4334	chr9	52738500	52738700	200	175.223	3.5636	0.000988599	1	chip1_peak_6739	chr9_52738500_52738700	chr9	52738500	52738700	382139	Gm1715
557	chr15	75800000	75800500	500	175.235	3.56384	0.000122492	1	chip1_peak_803	chr15_75800000_75800500	chr15	75800000	75800500	223642	Zc3h3
1968	chr4	117985800	117986000	200	175.255	3.56425	0.000458629	1	chip1_peak_2920	chr4_117985800_117986000	chr4	117985800	117986000	20441	St3gal3
1783	chr1	127408100	127408300	200	175.257	3.56428	0.000412399	1	chip1_peak_2615	chr1_127408100_127408300	chr1	127408100	127408300	107895	Mgat5
3934	chr1	187742400	187742600	200	175.262	3.56439	0.000902206	1	chip1_peak_6064	chr1_187742400_187742600	chr1	187742400	187742600	26381	Esrrg
4318	chr4	150417500	150417700	200	175.39	3.567	0.000985028	1	chip1_peak_6707	chr4_150417500_150417700	chr4	150417500	150417700	68703	Rere
1053	chr11	95145600	95145800	200	175.396	3.56712	0.000236579	1	chip1_peak_1512	chr11_95145600_95145800	chr11	95145600	95145800	13394	Dlx4
1054	chr11	95145600	95145800	200	175.396	3.56712	0.000236579	1	chip1_peak_1512	chr11_95145600_95145800	chr11	95145600	95145800	320453	A730090H04Rik
4348	chr12	108638500	108638700	200	175.436	3.56794	0.000993091	1	chip1_peak_6771	chr12_108638500_108638700	chr12	108638500	108638700	14026	Evl
3859	chr11	113057700	113057900	200	175.485	3.56893	0.00088792	1	chip1_peak_5945	chr11_113057700_113057900	chr11	113057700	113057900	72386	2610035D17Rik
2915	chr9	64006900	64007100	200	175.596	3.57119	0.000675944	1	chip1_peak_4416	chr9_64006900_64007100	chr9	64006900	64007100	17130	Smad6
2657	chr4	135151600	135151800	200	175.63	3.57188	0.000618446	1	chip1_peak_4017	chr4_135151600_135151800	chr4	135151600	135151800	12399	Runx3
4037	chr9	64650300	64650500	200	175.661	3.5725	0.000924807	1	chip1_peak_6252	chr9_64650300_64650500	chr9	64650300	64650500	214058	Megf11
2358	chr2	166640000	166640200	200	175.702	3.57335	0.000546057	1	chip1_peak_3525	chr2_166640000_166640200	chr2	166640000	166640200	277360	Prex1
3567	chr16	34102400	34102600	200	175.761	3.57455	0.000822097	1	chip1_peak_5475	chr16_34102400_34102600	chr16	34102400	34102600	545156	Kalrn
4356	chr1	59218400	59218600	200	175.761	3.57455	0.000994969	1	chip1_peak_6785	chr1_59218400_59218600	chr1	59218400	59218600	74018	Als2
819	chr7	30661100	30661400	300	175.784	3.57501	0.000185572	1	chip1_peak_1170	chr7_30661100_30661400	chr7	30661100	30661400	71909	Haus5
3761	chr7	136999400	136999600	200	175.823	3.5758	0.000867181	1	chip1_peak_5794	chr7_136999400_136999600	chr7	136999400	136999600	17314	Mgmt
3791	chr15	90892100	90892300	200	175.859	3.57652	0.000874774	1	chip1_peak_5844	chr15_90892100_90892300	chr15	90892100	90892300	20738	Spn-ps
4361	chr12	3816700	3816900	200	175.907	3.57752	0.000995774	1	chip1_peak_6792	chr12_3816700_3816900	chr12	3816700	3816900	13435	Dnmt3a
2575	chr5	103787300	103787500	200	175.957	3.57853	0.000600013	1	chip1_peak_3892	chr5_103787300_103787500	chr5	103787300	103787500	17355	Aff1
1326	chr9	66256900	66257100	200	176.073	3.58089	0.000308166	1	chip1_peak_1925	chr9_66256900_66257100	chr9	66256900	66257100	13143	Dapk2
2323	chr12	110749400	110749600	200	176.076	3.58095	0.000539289	1	chip1_peak_3465	chr12_110749400_110749600	chr12	110749400	110749600	70948	Wdr20rt
1092	chr13	58392800	58393000	200	176.091	3.58126	0.000247735	1	chip1_peak_1576	chr13_58392800_58393000	chr13	58392800	58393000	15387	Hnrnpk
1093	chr13	58392800	58393000	200	176.091	3.58126	0.000247735	1	chip1_peak_1576	chr13_58392800_58393000	chr13	58392800	58393000	723902	Mir7-1
4185	chr14	47505100	47505300	200	176.162	3.5827	0.000955486	1	chip1_peak_6485	chr14_47505100_47505300	chr14	47505100	47505300	78938	Fbxo34
2549	chr1	133276500	133276700	200	176.167	3.5828	0.000593982	1	chip1_peak_3856	chr1_133276500_133276700	chr1	133276500	133276700	240753	Plekha6
3702	chr1	123606700	123606900	200	176.196	3.58339	0.000854347	1	chip1_peak_5702	chr1_123606700_123606900	chr1	123606700	123606900	269109	Dpp10
1993	chr15	80395300	80395500	200	176.23	3.58408	0.000466055	1	chip1_peak_2965	chr15_80395300_80395500	chr15	80395300	80395500	239556	Cacna1i
2508	chr9	121276600	121276900	300	176.33	3.58611	0.000587248	1	chip1_peak_3795	chr9_121276600_121276900	chr9	121276600	121276900	209012	Ulk4
537	chr6	38818500	38818700	200	176.414	3.58782	0.000112326	1	chip1_peak_761	chr6_38818500_38818700	chr6	38818500	38818700	15258	Hipk2
1700	chr10	128643600	128643800	200	176.426	3.58807	0.000394709	1	chip1_peak_2486	chr10_128643600_128643800	chr10	128643600	128643800	22781	Ikzf4
2099	chr14	122537400	122537600	200	176.559	3.59076	0.000491479	1	chip1_peak_3128	chr14_122537400_122537600	chr14	122537400	122537600	110821	Pcca
3654	chr6	137136000	137136200	200	176.57	3.591	0.000841705	1	chip1_peak_5618	chr6_137136000_137136200	chr6	137136000	137136200	232441	Rerg
2725	chr6	31237800	31238000	200	176.681	3.59324	0.000632039	1	chip1_peak_4127	chr6_31237800_31238000	chr6	31237800	31238000	73652	2210408F21Rik
1994	chr16	23473100	23473300	200	176.7	3.59364	0.000466391	1	chip1_peak_2966	chr16_23473100_23473300	chr16	23473100	23473300	17174	Masp1
1995	chr3	59121500	59121700	200	176.7	3.59364	0.000466391	1	chip1_peak_2967	chr3_59121500_59121700	chr3	59121500	59121700	140795	P2ry14
1996	chr3	59121500	59121700	200	176.7	3.59364	0.000466391	1	chip1_peak_2967	chr3_59121500_59121700	chr3	59121500	59121700	329650	Med12l
121	chr8	128420800	128421000	200	176.751	3.59467	1.78e-05	0.822751	chip1_peak_180	chr8_128420800_128421000	chr8	128420800	128421000	18186	Nrp1
2004	chr3	118647000	118647200	200	176.84	3.59649	0.000467473	1	chip1_peak_2978	chr3_118647000_118647200	chr3	118647000	118647200	99586	Dpyd
3035	chr8	105145800	105146100	300	176.845	3.59658	0.000704638	1	chip1_peak_4607	chr8_105145800_105146100	chr8	105145800	105146100	234677	Ces4a
922	chr2	90526900	90527200	300	176.846	3.59662	0.000208402	1	chip1_peak_1322	chr2_90526900_90527200	chr2	90526900	90527200	19271	Ptprj
2423	chr8	105994800	105995000	200	177.002	3.59979	0.000564924	1	chip1_peak_3642	chr8_105994800_105995000	chr8	105994800	105995000	319446	Dpep2
2000	chr1	169971000	169971200	200	177.002	3.59979	0.000466911	1	chip1_peak_2973	chr1_169971000_169971200	chr1	169971000	169971200	67303	3110045C21Rik
3937	chr3	95241600	95241800	200	177.123	3.60223	0.000903069	1	chip1_peak_6071	chr3_95241600_95241800	chr3	95241600	95241800	171388	Bnipl
1784	chr8	77004500	77004700	200	177.181	3.60342	0.000412491	1	chip1_peak_2616	chr8_77004500_77004700	chr8	77004500	77004700	110784	Nr3c2
1303	chr2	10104800	10105400	600	177.328	3.60641	0.000303183	1	chip1_peak_1894	chr2_10104800_10105400	chr2	10104800	10105400	16425	Itih2
1320	chr6	48443100	48443300	200	177.429	3.60846	0.00030717	1	chip1_peak_1919	chr6_48443100_48443300	chr6	48443100	48443300	68910	Zfp467
756	chr12	103601300	103601600	300	177.478	3.60946	0.000172595	1	chip1_peak_1088	chr12_103601300_103601600	chr12	103601300	103601600	74521	Ppp4r4
4155	chr14	79568000	79568200	200	177.623	3.61242	0.000949474	1	chip1_peak_6445	chr14_79568000_79568200	chr14	79568000	79568200	13709	Elf1
3806	chr11	121076400	121076600	200	177.646	3.61288	0.000878281	1	chip1_peak_5868	chr11_121076400_121076600	chr11	121076400	121076600	209588	Sectm1a
2259	chr8	119761200	119761400	200	177.665	3.61326	0.000525729	1	chip1_peak_3372	chr8_119761200_119761400	chr8	119761200	119761400	74347	Tldc1
1912	chr19	5696600	5696800	200	177.699	3.61396	0.000448227	1	chip1_peak_2842	chr19_5696600_5696800	chr19	5696600	5696800	26403	Map3k11
2096	chr3	126812700	126812900	200	177.706	3.6141	0.00049074	1	chip1_peak_3123	chr3_126812700_126812900	chr3	126812700	126812900	108058	Camk2d
591	chr5	114451200	114451500	300	177.919	3.61843	0.000131085	1	chip1_peak_851	chr5_114451200_114451500	chr5	114451200	114451500	17855	Mvk
4178	chr16	13299300	13299500	200	178.013	3.62034	0.000953072	1	chip1_peak_6475	chr16_13299300_13299500	chr16	13299300	13299500	239719	Mkl2
2053	chr19	34727600	34727800	200	178.033	3.62076	0.000478048	1	chip1_peak_3054	chr19_34727600_34727800	chr19	34727600	34727800	240638	Slc16a12
4145	chr6	39053900	39054100	200	178.057	3.62124	0.000946054	1	chip1_peak_6424	chr6_39053900_39054100	chr6	39053900	39054100	21391	Tbxas1
250	chr13	70605100	70605300	200	178.092	3.62196	4.64e-05	1	chip1_peak_355	chr13_70605100_70605300	chr13	70605100	70605300	218333	Ice1
2033	chr10	21341800	21342000	200	178.197	3.62408	0.000474286	1	chip1_peak_3024	chr10_21341800_21342000	chr10	21341800	21342000	56422	Hbs1l
2034	chr10	21341800	21342000	200	178.197	3.62408	0.000474286	1	chip1_peak_3024	chr10_21341800_21342000	chr10	21341800	21342000	73990	4930455C13Rik
179	chr1	134596400	134596700	300	178.252	3.6252	2.87e-05	0.98166	chip1_peak_259	chr1_134596400_134596700	chr1	134596400	134596700	75605	Kdm5b
1491	chr13	23611600	23611800	200	178.34	3.62698	0.000344089	1	chip1_peak_2172	chr13_23611600_23611800	chr13	23611600	23611800	319179	Hist1h2be
3679	chr1	161058000	161058200	200	178.35	3.6272	0.000849778	1	chip1_peak_5668	chr1_161058000_161058200	chr1	161058000	161058200	226539	Dars2
3309	chr11	4927500	4927700	200	178.401	3.62822	0.000762369	1	chip1_peak_5044	chr11_4927500_4927700	chr11	4927500	4927700	107829	Thoc5
3503	chr8	128418200	128418400	200	178.413	3.62847	0.000803394	1	chip1_peak_5357	chr8_128418200_128418400	chr8	128418200	128418400	18186	Nrp1
952	chr17	78931100	78931300	200	178.437	3.62896	0.000214529	1	chip1_peak_1364	chr17_78931100_78931300	chr17	78931100	78931300	12607	Cebpz
2002	chr12	110537100	110537300	200	178.542	3.6311	0.000467318	1	chip1_peak_2975	chr12_110537100_110537300	chr12	110537100	110537300	26931	Ppp2r5c
2569	chr4	151802900	151803100	200	178.542	3.6311	0.000598965	1	chip1_peak_3884	chr4_151802900_151803100	chr4	151802900	151803100	100072	Camta1
2066	chr3	129868300	129868500	200	178.576	3.63179	0.000482669	1	chip1_peak_3075	chr3_129868300_129868500	chr3	129868300	129868500	12630	Cfi
4053	chr19	29068800	29069000	200	178.621	3.6327	0.000928389	1	chip1_peak_6277	chr19_29068800_29069000	chr19	29068800	29069000	100503337	Gm9895
4054	chr6	121361100	121361300	200	178.621	3.6327	0.000928389	1	chip1_peak_6278	chr6_121361100_121361300	chr6	121361100	121361300	14411	Slc6a12
4023	chr5	140906700	140906900	200	178.641	3.63312	0.000922343	1	chip1_peak_6229	chr5_140906700_140906900	chr5	140906700	140906900	108723	Card11
3606	chr5	121536500	121536700	200	178.703	3.63437	0.000830785	1	chip1_peak_5540	chr5_121536500_121536700	chr5	121536500	121536700	17165	Mapkapk5
1857	chr5	32773500	32773800	300	178.754	3.63541	0.000431547	1	chip1_peak_2745	chr5_32773500_32773800	chr5	32773500	32773800	320951	Pisd
3192	chr17	50635100	50635300	200	178.755	3.63543	0.000739764	1	chip1_peak_4868	chr17_50635100_50635300	chr17	50635100	50635300	224860	Plcl2
2280	chr6	89413300	89413600	300	178.783	3.636	0.00053076	1	chip1_peak_3404	chr6_89413300_89413600	chr6	89413300	89413600	66098	Chchd6
1448	chr17	24421400	24421600	200	178.788	3.63609	0.000334748	1	chip1_peak_2111	chr17_24421400_24421600	chr17	24421400	24421600	19826	Rnps1
3168	chr6	124822000	124822200	200	178.875	3.63787	0.000733977	1	chip1_peak_4832	chr6_124822000_124822200	chr6	124822000	124822200	22225	Usp5
3153	chr6	88564400	88564700	300	178.901	3.6384	0.000731642	1	chip1_peak_4808	chr6_88564400_88564700	chr6	88564400	88564700	74589	Kbtbd12
111	chr4	40171500	40171900	400	178.964	3.63969	1.51e-05	0.769158	chip1_peak_165	chr4_40171500_40171900	chr4	40171500	40171900	11428	Aco1
3550	chr11	121308600	121308800	200	178.987	3.64016	0.000817876	1	chip1_peak_5449	chr11_121308600_121308800	chr11	121308600	121308800	68837	Foxk2
3181	chr15	35789900	35790100	200	179.125	3.64297	0.000737922	1	chip1_peak_4853	chr15_35789900_35790100	chr15	35789900	35790100	666173	Vps13b
3390	chr13	43426500	43426700	200	179.201	3.6445	0.000780107	1	chip1_peak_5173	chr13_43426500_43426700	chr13	43426500	43426700	226432	Ipo9
3811	chr5	151108800	151109000	200	179.209	3.64466	0.000879221	1	chip1_peak_5875	chr5_151108800_151109000	chr5	151108800	151109000	243362	Stard13
3451	chr7	141101200	141101400	200	179.209	3.64466	0.000791322	1	chip1_peak_5274	chr7_141101200_141101400	chr7	141101200	141101400	71345	Ano9
1906	chr3	108263100	108263300	200	179.223	3.64495	0.000447749	1	chip1_peak_2836	chr3_108263100_108263300	chr3	108263100	108263300	26442	Psma5
3096	chr1	80660000	80660200	200	179.268	3.64586	0.000719512	1	chip1_peak_4718	chr1_80660000_80660200	chr1	80660000	80660200	210293	Dock10
3477	chr2	129090000	129090200	200	179.328	3.64709	0.000798795	1	chip1_peak_5323	chr2_129090000_129090200	chr2	129090000	129090200	69737	Ttl
3885	chr2	77195200	77195400	200	179.361	3.64775	0.000893268	1	chip1_peak_5989	chr2_77195200_77195400	chr2	77195200	77195400	228071	Sestd1
4367	chr3	69429700	69429900	200	179.388	3.6483	0.000996258	1	chip1_peak_6802	chr3_69429700_69429900	chr3	69429700	69429900	242083	Ppm1l
138	chr8	128421100	128421600	500	179.392	3.64838	2.13e-05	0.896405	chip1_peak_202	chr8_128421100_128421600	chr8	128421100	128421600	18186	Nrp1
3308	chr2	71008200	71008500	300	179.436	3.64928	0.000762	1	chip1_peak_5043	chr2_71008200_71008500	chr2	71008200	71008500	228019	Mettl8
781	chr1	139734100	139734500	400	179.457	3.64972	0.000177198	1	chip1_peak_1118	chr1_139734100_139734500	chr1	139734100	139734500	214403	Gm4788
2111	chr5	149211100	149211300	200	179.543	3.65145	0.000494293	1	chip1_peak_3150	chr5_149211100_149211300	chr5	149211100	149211300	231915	Uspl1
438	chr12	76821300	76821600	300	179.548	3.65156	9.02e-05	1	chip1_peak_628	chr12_76821300_76821600	chr12	76821300	76821600	104886	Rab15
4218	chr19	7379700	7379900	200	179.601	3.65264	0.000962612	1	chip1_peak_6546	chr19_7379700_7379900	chr19	7379700	7379900	68229	AI846148
1541	chr2	120461300	120461500	200	179.622	3.65307	0.000355919	1	chip1_peak_2253	chr2_120461300_120461500	chr2	120461300	120461500	70933	4931402G19Rik
1341	chr9	21480500	21480800	300	179.696	3.65456	0.000312212	1	chip1_peak_1954	chr9_21480500_21480800	chr9	21480500	21480800	13430	Dnm2
3342	chr16	17027400	17027600	200	179.73	3.65526	0.000769641	1	chip1_peak_5098	chr16_17027400_17027600	chr16	17027400	17027600	26413	Mapk1
869	chr4	149329900	149330100	200	179.751	3.65569	0.000196765	1	chip1_peak_1244	chr4_149329900_149330100	chr4	149329900	149330100	63958	Ube4b
227	chr11	70465100	70465400	300	179.763	3.65594	4.03e-05	1	chip1_peak_321	chr11_70465100_70465400	chr11	70465100	70465400	574428	Zmynd15
1795	chr1	180583500	180583800	300	179.882	3.65835	0.000414127	1	chip1_peak_2635	chr1_180583500_180583800	chr1	180583500	180583800	11545	Parp1
3378	chr2	28030300	28030500	200	179.914	3.65901	0.000778608	1	chip1_peak_5157	chr2_28030300_28030500	chr2	28030300	28030500	12831	Col5a1
4163	chr15	80155800	80156000	200	179.945	3.65964	0.00095041	1	chip1_peak_6454	chr15_80155800_80156000	chr15	80155800	80156000	66513	Tab1
845	chr10	40116800	40117000	200	179.95	3.65973	0.000192106	1	chip1_peak_1202	chr10_40116800_40117000	chr10	40116800	40117000	72472	Slc16a10
1394	chr17	53652600	53652900	300	179.95	3.65974	0.00032284	1	chip1_peak_2030	chr17_53652600_53652900	chr17	53652600	53652900	18519	Kat2b
4174	chr8	45720300	45720500	200	180.01	3.66095	0.000952205	1	chip1_peak_6471	chr8_45720300_45720500	chr8	45720300	45720500	234214	Sorbs2
[truncated: 1,736 more rows]

## Sheet: Snhg3_HKI
	chr.x	start	end	length	signal value	M(Log2FC)	p	q	peak	chrom	chr.y	peak.start	peak.end	gene.id	symbol
6693	chr18	61713900	61714100	200	110.2	2.00028	0.000722143	0.636385	chip2_peak_11041	chr18_61713900_61714100	chr18	61713900	61714100	17714	Grpel2
140	chr5	111358700	111359100	400	110.202	2.00033	1.33e-06	0.0407252	chip2_peak_260	chr5_111358700_111359100	chr5	111358700	111359100	56305	Pitpnb
3997	chr8	57800400	57800700	300	110.251	2.00121	0.00039237	0.570365	chip2_peak_6511	chr8_57800400_57800700	chr8	57800400	57800700	270049	Galntl6
884	chr19	20528600	20529000	400	110.256	2.0013	4.66e-05	0.280747	chip2_peak_1452	chr19_20528600_20529000	chr19	20528600	20529000	320092	E030003E18Rik
1094	chr11	60248100	60248400	300	110.264	2.00145	6.79e-05	0.332202	chip2_peak_1804	chr11_60248100_60248400	chr11	60248100	60248400	216810	Tom1l2
1750	chr3	84962300	84962600	300	110.264	2.00145	0.000130276	0.414377	chip2_peak_2849	chr3_84962300_84962600	chr3	84962300	84962600	50754	Fbxw7
515	chr4	123535400	123535600	200	110.294	2.00199	2.02e-05	0.192732	chip2_peak_887	chr4_123535400_123535600	chr4	123535400	123535600	11426	Macf1
986	chr5	3466300	3466900	600	110.304	2.00218	5.67e-05	0.306331	chip2_peak_1631	chr5_3466300_3466900	chr5	3466300	3466900	12571	Cdk6
7284	chr7	66339700	66339900	200	110.305	2.00219	0.000796118	0.645246	chip2_peak_12053	chr7_66339700_66339900	chr7	66339700	66339900	233328	Lrrk1
2866	chr6	72606300	72606500	200	110.333	2.0027	0.000259854	0.515789	chip2_peak_4693	chr6_72606300_72606500	chr6	72606300	72606500	67442	Retsat
1907	chr11	93997900	93998200	300	110.346	2.00294	0.000147502	0.433816	chip2_peak_3102	chr11_93997900_93998200	chr11	93997900	93998200	70834	Spag9
5551	chr14	105288600	105288900	300	110.348	2.00297	0.000580101	0.614375	chip2_peak_9115	chr14_105288600_105288900	chr14	105288600	105288900	76273	Ndfip2
2332	chr7	132705200	132705400	200	110.362	2.00323	0.000197447	0.476853	chip2_peak_3825	chr7_132705200_132705400	chr7	132705200	132705400	76429	Lhpp
4990	chr5	120604800	120605000	200	110.366	2.0033	0.000512511	0.600571	chip2_peak_8164	chr5_120604800_120605000	chr5	120604800	120605000	75732	Iqcd
2063	chr9	77756600	77756800	200	110.37	2.00337	0.000164996	0.447121	chip2_peak_3381	chr9_77756600_77756800	chr9	77756600	77756800	14629	Gclc
3989	chr11	75596000	75596300	300	110.441	2.00466	0.000391033	0.57002	chip2_peak_6494	chr11_75596000_75596300	chr11	75596000	75596300	18738	Pitpna
99	chr4	35146300	35146900	600	110.468	2.00516	5.43e-07	0.0233608	chip2_peak_177	chr4_35146300_35146900	chr4	35146300	35146900	214944	Mob3b
3994	chr13	45711400	45711600	200	110.471	2.0052	0.000391999	0.570156	chip2_peak_6506	chr13_45711400_45711600	chr13	45711400	45711600	20238	Atxn1
5706	chr8	18606800	18607000	200	110.476	2.0053	0.000598402	0.617931	chip2_peak_9365	chr8_18606800_18607000	chr8	18606800	18607000	244329	Mcph1
5417	chr11	21239800	21240000	200	110.502	2.00577	0.000562782	0.610954	chip2_peak_8874	chr11_21239800_21240000	chr11	21239800	21240000	245944	Vps54
3034	chr11	35977500	35977800	300	110.512	2.00595	0.000280971	0.526737	chip2_peak_4979	chr11_35977500_35977800	chr11	35977500	35977800	211652	Wwc1
1288	chr2	26418000	26418600	600	110.517	2.00603	8.17e-05	0.348548	chip2_peak_2084	chr2_26418000_26418600	chr2	26418000	26418600	227648	Sec16a
7882	chr6	87670200	87670400	200	110.527	2.00621	0.000873808	0.651913	chip2_peak_13119	chr6_87670200_87670400	chr6	87670200	87670400	72103	Aplf
6508	chr14	78987500	78987700	200	110.547	2.00658	0.000698755	0.632506	chip2_peak_10747	chr14_78987500_78987700	chr14	78987500	78987700	219189	Vwa8
292	chr16	4062200	4062500	300	110.571	2.00701	6.93e-06	0.11106	chip2_peak_508	chr16_4062200_4062500	chr16	4062200	4062500	73122	Tgfbrap1
941	chr3	96561600	96562100	500	110.583	2.00724	5.21e-05	0.296247	chip2_peak_1546	chr3_96561600_96562100	chr3	96561600	96562100	100038464	Gm15441
942	chr3	96561600	96562100	500	110.583	2.00724	5.21e-05	0.296247	chip2_peak_1546	chr3_96561600_96562100	chr3	96561600	96562100	56338	Txnip
5363	chr13	92274700	92274900	200	110.585	2.00727	0.000556736	0.610648	chip2_peak_8783	chr13_92274700_92274900	chr13	92274700	92274900	17686	Msh3
1432	chr15	78802200	78802400	200	110.592	2.00739	9.44e-05	0.367878	chip2_peak_2316	chr15_78802200_78802400	chr15	78802200	78802400	105844	Card10
6005	chr1	37891300	37891600	300	110.598	2.0075	0.000639453	0.625897	chip2_peak_9905	chr1_37891300_37891600	chr1	37891300	37891600	107734	Mrpl30
7391	chr3	146618200	146618400	200	110.604	2.00762	0.000809264	0.646243	chip2_peak_12234	chr3_146618200_146618400	chr3	146618200	146618400	22262	Uox
791	chr18	68942200	68942700	500	110.659	2.00862	4.01e-05	0.264606	chip2_peak_1313	chr18_68942200_68942700	chr18	68942200	68942700	78931	4930546C10Rik
3913	chr4	150594100	150594400	300	110.672	2.00886	0.00038263	0.568532	chip2_peak_6371	chr4_150594100_150594400	chr4	150594100	150594400	68703	Rere
1783	chr11	3445100	3445300	200	110.685	2.0091	0.000134549	0.420265	chip2_peak_2904	chr11_3445100_3445300	chr11	3445100	3445300	100499518	Mir3470a
1784	chr11	3445100	3445300	200	110.685	2.0091	0.000134549	0.420265	chip2_peak_2904	chr11_3445100_3445300	chr11	3445100	3445300	193670	Rnf185
6225	chr14	33033400	33033600	200	110.693	2.00924	0.000663446	0.628601	chip2_peak_10247	chr14_33033400_33033600	chr14	33033400	33033600	545030	Wdfy4
6578	chr14	33084600	33084800	200	110.705	2.00945	0.000706586	0.633681	chip2_peak_10852	chr14_33084600_33084800	chr14	33084600	33084800	545030	Wdfy4
990	chr17	5899200	5899700	500	110.709	2.00953	5.73e-05	0.308403	chip2_peak_1636	chr17_5899200_5899700	chr17	5899200	5899700	66616	Snx9
2547	chrX	137019400	137019600	200	110.711	2.00955	0.000220855	0.491498	chip2_peak_4165	chrX_137019400_137019600	chrX	137019400	137019600	67062	Slc25a53
3663	chr14	62940400	62940600	200	110.727	2.00986	0.000354454	0.559466	chip2_peak_5990	chr14_62940400_62940600	chr14	62940400	62940600	268752	Wdfy2
4645	chr9	106786000	106786200	200	110.733	2.00995	0.000472093	0.592894	chip2_peak_7599	chr9_106786000_106786200	chr9	106786000	106786200	81000	Rad54l2
6355	chr13	34224200	34224400	200	110.753	2.01033	0.000679752	0.630863	chip2_peak_10471	chr13_34224200_34224400	chr13	34224200	34224400	73102	Slc22a23
7465	chr17	71249600	71249800	200	110.762	2.01048	0.000818628	0.647397	chip2_peak_12371	chr17_71249600_71249800	chr17	71249600	71249800	64898	Lpin2
5169	chr5	128579100	128579600	500	110.8	2.01117	0.000535057	0.605729	chip2_peak_8466	chr5_128579100_128579600	chr5	128579100	128579600	319616	5930412G12Rik
684	chr5	123167800	123168300	500	110.809	2.01134	3.15e-05	0.235016	chip2_peak_1152	chr5_123167800_123168300	chr5	123167800	123168300	208043	Setd1b
3243	chr17	25992800	25993000	200	110.828	2.01169	0.000303549	0.536187	chip2_peak_5309	chr17_25992800_25993000	chr17	25992800	25993000	215445	Rab11fip3
363	chrX	75155700	75156000	300	110.833	2.01178	9.45e-06	0.130358	chip2_peak_611	chrX_75155700_75156000	chrX	75155700	75156000	434800	Smim9
7526	chr2	126586000	126586200	200	110.879	2.0126	0.000825842	0.648074	chip2_peak_12475	chr2_126586000_126586200	chr2	126586000	126586200	26458	Slc27a2
3386	chr10	122679800	122680100	300	110.884	2.0127	0.000322116	0.546824	chip2_peak_5537	chr10_122679800_122680100	chr10	122679800	122680100	319468	Ppm1h
3755	chr10	115385900	115386100	200	110.886	2.01274	0.00036442	0.562265	chip2_peak_6135	chr10_115385900_115386100	chr10	115385900	115386100	216345	Zfc3h1
2000	chr3	121256200	121256500	300	110.889	2.0128	0.000158406	0.442006	chip2_peak_3281	chr3_121256200_121256500	chr3	121256200	121256500	99887	Tmem56
5227	chr5	49120500	49120700	200	110.894	2.01288	0.000540874	0.606693	chip2_peak_8566	chr5_49120500_49120700	chr5	49120500	49120700	80334	Kcnip4
7181	chr17	44943900	44944100	200	110.897	2.01294	0.000784823	0.643976	chip2_peak_11881	chr17_44943900_44944100	chr17	44943900	44944100	109115	Supt3
174	chr14	66103900	66104300	400	110.937	2.01366	2.22e-06	0.0560306	chip2_peak_311	chr14_66103900_66104300	chr14	66103900	66104300	13850	Ephx2
3139	chr2	92425600	92425800	200	110.953	2.01395	0.000292636	0.532213	chip2_peak_5147	chr2_92425600_92425800	chr2	92425600	92425800	12953	Cry2
3140	chr2	92425600	92425800	200	110.953	2.01395	0.000292636	0.532213	chip2_peak_5147	chr2_92425600_92425800	chr2	92425600	92425800	320507	D930015M05Rik
7271	chr16	32934400	32934600	200	110.962	2.01411	0.000794854	0.645141	chip2_peak_12033	chr16_32934400_32934600	chr16	32934400	32934600	70144	Lrch3
8585	chr10	24912300	24912500	200	110.973	2.01431	0.000962744	0.657711	chip2_peak_14384	chr10_24912300_24912500	chr10	24912300	24912500	70208	Med23
1621	chr4	152227400	152227600	200	110.981	2.01445	0.000115785	0.397691	chip2_peak_2644	chr4_152227400_152227600	chr4	152227400	152227600	70025	Acot7
6234	chr14	7839300	7839500	200	111.006	2.01492	0.000665023	0.628712	chip2_peak_10267	chr14_7839300_7839500	chr14	7839300	7839500	286940	Flnb
7871	chr10	32411400	32411600	200	111.022	2.01521	0.000872054	0.651913	chip2_peak_13096	chr10_32411400_32411600	chr10	32411400	32411600	432450	Nkain2
863	chr13	43654100	43654400	300	111.041	2.01554	4.55e-05	0.278909	chip2_peak_1424	chr13_43654100_43654400	chr13	43654100	43654400	328234	Rnf182
5538	chr9	9040800	9041000	200	111.052	2.01574	0.000578596	0.614095	chip2_peak_9093	chr9_9040800_9041000	chr9	9040800	9041000	71544	Arhgap42
2167	chr5	114738800	114739000	200	111.057	2.01584	0.000177731	0.458914	chip2_peak_3560	chr5_114738800_114739000	chr5	114738800	114739000	26431	Git2
8248	chr18	35840500	35840700	200	111.077	2.0162	0.000920588	0.65458	chip2_peak_13773	chr18_35840500_35840700	chr18	35840500	35840700	67393	Cxxc5
2724	chr3	95676500	95676700	200	111.088	2.0164	0.000242512	0.504143	chip2_peak_4459	chr3_95676500_95676700	chr3	95676500	95676700	229595	Adamtsl4
2941	chr2	154548600	154549000	400	111.099	2.0166	0.000269582	0.522099	chip2_peak_4820	chr2_154548600_154549000	chr2	154548600	154549000	56846	Necab3
2942	chr2	154548600	154549000	400	111.099	2.0166	0.000269582	0.522099	chip2_peak_4820	chr2_154548600_154549000	chr2	154548600	154549000	75480	1700003F12Rik
4224	chr11	66935100	66935300	200	111.118	2.01694	0.000422568	0.580855	chip2_peak_6902	chr11_66935100_66935300	chr11	66935100	66935300	100038666	Gm12298
6377	chr8	27202100	27202300	200	111.134	2.01723	0.000682333	0.630901	chip2_peak_10512	chr8_27202100_27202300	chr8	27202100	27202300	76615	Got1l1
1653	chr11	121652600	121652900	300	111.147	2.01747	0.000118327	0.400523	chip2_peak_2686	chr11_121652600_121652900	chr11	121652600	121652900	210004	B3gntl1
2272	chr8	120666000	120666200	200	111.158	2.01767	0.000188981	0.468495	chip2_peak_3717	chr8_120666000_120666200	chr8	120666000	120666200	18117	Emc8
3538	chr15	79393100	79393300	200	111.172	2.01792	0.000340037	0.555102	chip2_peak_5777	chr15_79393100_79393300	chr15	79393100	79393300	223693	Tmem184b
6333	chr5	144265200	144265400	200	111.195	2.01834	0.000675737	0.62987	chip2_peak_10428	chr5_144265200_144265400	chr5	144265200	144265400	66898	Baiap2l1
1924	chr17	56373300	56373500	200	111.195	2.01834	0.000150293	0.437113	chip2_peak_3133	chr17_56373300_56373500	chr17	56373300	56373500	193796	Kdm4b
3911	chr3	31044900	31045200	300	111.203	2.01849	0.000382427	0.568532	chip2_peak_6368	chr3_31044900_31045200	chr3	31044900	31045200	18759	Prkci
4326	chr5	135064400	135064600	200	111.287	2.02001	0.000434434	0.583934	chip2_peak_7067	chr5_135064400_135064600	chr5	135064400	135064600	66114	Dnajc30
4327	chr5	135064400	135064600	200	111.287	2.02001	0.000434434	0.583934	chip2_peak_7067	chr5_135064400_135064600	chr5	135064400	135064600	66138	Wbscr22
6223	chr4	151335200	151335400	200	111.295	2.02017	0.000663275	0.628601	chip2_peak_10244	chr4_151335200_151335400	chr4	151335200	151335400	100072	Camta1
442	chr2	135854500	135855000	500	111.296	2.02019	1.51e-05	0.170003	chip2_peak_745	chr2_135854500_135855000	chr2	135854500	135855000	18798	Plcb4
2173	chr2	11513100	11513300	200	111.3	2.02025	0.00017824	0.459203	chip2_peak_3569	chr2_11513100_11513300	chr2	11513100	11513300	170768	Pfkfb3
2701	chr3	131238500	131238700	200	111.323	2.02067	0.000239347	0.502223	chip2_peak_4419	chr3_131238500_131238700	chr3	131238500	131238700	15107	Hadh
339	chr17	27850700	27851400	700	111.373	2.02158	8.46e-06	0.122232	chip2_peak_579	chr17_27850700_27851400	chr17	27850700	27851400	20630	Snrpc
6246	chr4	107597200	107597400	200	111.376	2.02163	0.000665605	0.628727	chip2_peak_10279	chr4_107597200_107597400	chr4	107597200	107597400	230587	Glis1
2073	chr2	4592800	4593100	300	111.377	2.02165	0.000166992	0.450114	chip2_peak_3402	chr2_4592800_4593100	chr2	4592800	4593100	209630	Frmd4a
2758	chr3	97638800	97639400	600	111.419	2.02242	0.000246464	0.506262	chip2_peak_4514	chr3_97638800_97639400	chr3	97638800	97639400	14263	Fmo5
1659	chr7	126474300	126474800	500	111.426	2.02253	0.000118831	0.401329	chip2_peak_2694	chr7_126474300_126474800	chr7	126474300	126474800	20399	Sh2b1
4590	chr4	128655600	128655800	200	111.484	2.02358	0.000465659	0.591547	chip2_peak_7509	chr4_128655600_128655800	chr4	128655600	128655800	54383	Phc2
4422	chr2	58766800	58767000	200	111.505	2.02397	0.000446232	0.587543	chip2_peak_7223	chr2_58766800_58767000	chr2	58766800	58767000	76654	Upp2
431	chr4	49537600	49537900	300	111.534	2.0245	1.45e-05	0.166803	chip2_peak_728	chr4_49537600_49537900	chr4	49537600	49537900	230163	Aldob
5643	chr8	90867200	90867400	200	111.535	2.02452	0.0005923	0.617171	chip2_peak_9271	chr8_90867200_90867400	chr8	90867200	90867400	109151	Chd9
4279	chr1	46066700	46066900	200	111.556	2.02491	0.00042945	0.5831	chip2_peak_6991	chr1_46066700_46066900	chr1	46066700	46066900	227058	Dnah7b
4639	chr15	83118800	83119000	200	111.611	2.02589	0.00047146	0.592894	chip2_peak_7588	chr15_83118800_83119000	chr15	83118800	83119000	74778	Rrp7a
969	chr9	66575400	66575700	300	111.629	2.02622	5.48e-05	0.30149	chip2_peak_1601	chr9_66575400_66575700	chr9	66575400	66575700	235441	Usp3
697	chr19	3352100	3352300	200	111.634	2.02631	3.22e-05	0.237164	chip2_peak_1169	chr19_3352100_3352300	chr19	3352100	3352300	12894	Cpt1a
7946	chr16	94927700	94927900	200	111.64	2.02642	0.000880306	0.651913	chip2_peak_13234	chr16_94927700_94927900	chr16	94927700	94927900	16522	Kcnj6
5295	chr7	6941000	6941200	200	111.651	2.02662	0.000547417	0.608078	chip2_peak_8659	chr7_6941000_6941200	chr7	6941000	6941200	57775	Usp29
8272	chr11	110487400	110487600	200	111.656	2.02672	0.000922357	0.65458	chip2_peak_13811	chr11_110487400_110487600	chr11	110487400	110487600	26399	Map2k6
5793	chr14	67833100	67833300	200	111.697	2.02745	0.000609686	0.621067	chip2_peak_9504	chr14_67833100_67833300	chr14	67833100	67833300	68813	Dock5
5655	chr12	91709900	91710100	200	111.706	2.02762	0.000593268	0.617171	chip2_peak_9289	chr12_91709900_91710100	chr12	91709900	91710100	108800	Ston2
7747	chr7	30621200	30621400	200	111.715	2.02779	0.000855681	0.651393	chip2_peak_12876	chr7_30621200_30621400	chr7	30621200	30621400	110323	Cox6b1
8718	chr15	27867800	27868000	200	111.723	2.02793	0.000979521	0.658047	chip2_peak_14631	chr15_27867800_27868000	chr15	27867800	27868000	223435	Trio
7605	chr2	122260200	122260400	200	111.729	2.02804	0.000833891	0.648347	chip2_peak_12594	chr2_122260200_122260400	chr2	122260200	122260400	20322	Sord
7764	chr2	155387600	155387800	200	111.761	2.02862	0.000858002	0.65169	chip2_peak_12907	chr2_155387600_155387800	chr2	155387600	155387800	68728	Trp53inp2
1328	chr6	129535400	129535700	300	111.784	2.02904	8.52e-05	0.354491	chip2_peak_2150	chr6_129535400_129535700	chr6	129535400	129535700	57436	Gabarapl1
3129	chr1	155408300	155408500	200	111.786	2.02908	0.000291705	0.531733	chip2_peak_5133	chr1_155408300_155408500	chr1	155408300	155408500	19775	Xpr1
247	chr6	85250600	85251100	500	111.791	2.02916	4.6e-06	0.0847009	chip2_peak_436	chr6_85250600_85251100	chr6	85250600	85251100	94282	Sfxn5
752	chr7	47051600	47051900	300	111.799	2.02931	3.68e-05	0.253782	chip2_peak_1256	chr7_47051600_47051900	chr7	47051600	47051900	67893	Tmem86a
3532	chr7	45614100	45614400	300	111.804	2.0294	0.000339256	0.554537	chip2_peak_5769	chr7_45614100_45614400	chr7	45614100	45614400	56636	Fgf21
2449	chr6	58974600	58974800	200	111.805	2.02942	0.000211371	0.485873	chip2_peak_4025	chr6_58974600_58974800	chr6	58974600	58974800	58909	Fam13a
1205	chr3	97639900	97640400	500	111.809	2.02948	7.51e-05	0.341351	chip2_peak_1957	chr3_97639900_97640400	chr3	97639900	97640400	14263	Fmo5
835	chr12	79029200	79029400	200	111.818	2.02966	4.33e-05	0.27339	chip2_peak_1382	chr12_79029200_79029400	chr12	79029200	79029400	211945	Plekhh1
6169	chr13	4607100	4607300	200	111.848	2.0302	0.000656619	0.628032	chip2_peak_10151	chr13_4607100_4607300	chr13	4607100	4607300	56043	Akr1e1
323	chr5	74613700	74613900	200	111.852	2.03027	8.02e-06	0.120193	chip2_peak_557	chr5_74613700_74613900	chr5	74613700	74613900	16924	Lnx1
3181	chr1	58197100	58197300	200	111.874	2.03068	0.000295906	0.532818	chip2_peak_5209	chr1_58197100_58197300	chr1	58197100	58197300	71724	Aox3
2997	chr5	105527900	105528100	200	111.881	2.0308	0.000276253	0.525205	chip2_peak_4917	chr5_105527900_105528100	chr5	105527900	105528100	100604	Lrrc8c
154	chr1	106158200	106158700	500	111.885	2.03088	1.69e-06	0.0474421	chip2_peak_281	chr1_106158200_106158700	chr1	106158200	106158700	626049	Gm20753
4501	chr2	118790900	118791100	200	111.896	2.03107	0.00045394	0.588348	chip2_peak_7353	chr2_118790900_118791100	chr2	118790900	118791100	214240	Disp2
674	chr4	136176000	136176300	300	111.919	2.03148	3.07e-05	0.232752	chip2_peak_1136	chr4_136176000_136176300	chr4	136176000	136176300	242705	E2f2
6455	chr1	86155000	86155200	200	111.92	2.03151	0.000692211	0.632282	chip2_peak_10647	chr1_86155000_86155200	chr1	86155000	86155200	78795	Armc9
5930	chr2	38786200	38786400	200	111.93	2.03168	0.000629708	0.624864	chip2_peak_9765	chr2_38786200_38786400	chr2	38786200	38786400	14536	Nr6a1
6862	chr14	34093100	34093300	200	111.941	2.03188	0.00074218	0.638827	chip2_peak_11327	chr14_34093100_34093300	chr14	34093100	34093300	105518	A630023A22Rik
6863	chr14	34093100	34093300	200	111.941	2.03188	0.00074218	0.638827	chip2_peak_11327	chr14_34093100_34093300	chr14	34093100	34093300	11752	Anxa8
3212	chr9	108297300	108297500	200	111.964	2.0323	0.00029944	0.534617	chip2_peak_5257	chr9_108297300_108297500	chr9	108297300	108297500	434437	Amt
169	chr9	116174300	116174800	500	111.972	2.03244	2.06e-06	0.0536509	chip2_peak_304	chr9_116174300_116174800	chr9	116174300	116174800	21813	Tgfbr2
7326	chr13	70762500	70762700	200	111.982	2.03264	0.000802396	0.646243	chip2_peak_12125	chr13_70762500_70762700	chr13	70762500	70762700	271127	Adamts16
1358	chr6	4903700	4903900	200	111.984	2.03267	8.86e-05	0.360387	chip2_peak_2207	chr6_4903700_4903900	chr6	4903700	4903900	243725	Ppp1r9a
1382	chr6	70871500	70871700	200	111.986	2.03269	9.13e-05	0.365443	chip2_peak_2247	chr6_70871500_70871700	chr6	70871500	70871700	13666	Eif2ak3
2673	chr12	80681300	80681500	200	112.005	2.03305	0.000236491	0.500942	chip2_peak_4378	chr12_80681300_80681500	chr12	80681300	80681500	328133	Slc39a9
2733	chr11	5906600	5906800	200	112.015	2.03323	0.00024418	0.505427	chip2_peak_4478	chr11_5906600_5906800	chr11	5906600	5906800	103988	Gck
216	chr8	119532500	119533000	500	112.017	2.03326	3.74e-06	0.0753586	chip2_peak_392	chr8_119532500_119533000	chr8	119532500	119533000	56453	Mbtps1
7681	chr8	70182600	70182800	200	112.024	2.03339	0.000844138	0.649182	chip2_peak_12730	chr8_70182600_70182800	chr8	70182600	70182800	234371	Tmem161a
834	chr12	76938000	76938400	400	112.032	2.03354	4.3e-05	0.271815	chip2_peak_1381	chr12_76938000_76938400	chr12	76938000	76938400	17187	Max
7915	chr16	32889900	32890100	200	112.048	2.03383	0.000877552	0.651913	chip2_peak_13183	chr16_32889900_32890100	chr16	32889900	32890100	69823	Fyttd1
3330	chr17	5036300	5036600	300	112.062	2.03408	0.000312974	0.540282	chip2_peak_5441	chr17_5036300_5036600	chr17	5036300	5036600	239985	Arid1b
48	chr5	92772800	92773200	400	112.081	2.03443	6.11e-08	0.00562851	chip2_peak_79	chr5_92772800_92773200	chr5	92772800	92773200	27428	Shroom3
2503	chr15	85423900	85424200	300	112.111	2.03497	0.000217816	0.490794	chip2_peak_4104	chr15_85423900_85424200	chr15	85423900	85424200	54138	Atxn10
4151	chr2	18391800	18392100	300	112.114	2.03503	0.000412671	0.576807	chip2_peak_6787	chr2_18391800_18392100	chr2	18391800	18392100	13418	Dnajc1
5164	chr18	12731900	12732100	200	112.196	2.03652	0.000534773	0.605729	chip2_peak_8458	chr18_12731900_12732100	chr18	12731900	12732100	72747	Ttc39c
90	chr4	86664100	86665100	1000	112.222	2.03699	4.63e-07	0.0216125	chip2_peak_163	chr4_86664100_86665100	chr4	86664100	86665100	11520	Plin2
3087	chr12	4685600	4685900	300	112.249	2.03748	0.000287758	0.530927	chip2_peak_5063	chr12_4685600_4685900	chr12	4685600	4685900	20403	Itsn2
2713	chr16	13722900	13723200	300	112.251	2.03751	0.000241073	0.503398	chip2_peak_4437	chr16_13722900_13723200	chr16	13722900	13723200	26565	Pla2g10
5362	chr2	122467200	122467400	200	112.27	2.03786	0.000556094	0.610384	chip2_peak_8775	chr2_122467200_122467400	chr2	122467200	122467400	81913	Bambi-ps1
6595	chr13	24894300	24894500	200	112.272	2.03789	0.000709288	0.633965	chip2_peak_10885	chr13_24894300_24894500	chr13	24894300	24894500	210108	D130043K22Rik
1891	chr11	96046800	96047000	200	112.279	2.03802	0.00014512	0.430429	chip2_peak_3077	chr11_96046800_96047000	chr11	96046800	96047000	27681	Snf8
1676	chr8	85171200	85171700	500	112.29	2.03822	0.000120756	0.404097	chip2_peak_2716	chr8_85171200_85171700	chr8	85171200	85171700	624855	Cks1brt
6690	chr12	111853600	111853800	200	112.293	2.03828	0.000721348	0.636382	chip2_peak_11034	chr12_111853600_111853800	chr12	111853600	111853800	21981	Ppp1r13b
2314	chr7	130503300	130503500	200	112.309	2.03857	0.000195103	0.474801	chip2_peak_3795	chr7_130503300_130503500	chr7	130503300	130503500	11907	Ate1
4929	chr17	27751800	27752000	200	112.352	2.03934	0.000507053	0.600186	chip2_peak_8073	chr17_27751800_27752000	chr17	27751800	27752000	224647	D17Wsu92e
6699	chr13	99394800	99395000	200	112.368	2.03964	0.000724037	0.637245	chip2_peak_11057	chr13_99394800_99395000	chr13	99394800	99395000	218506	Mrps27
1679	chr10	117669500	117669700	200	112.381	2.03987	0.000120965	0.404097	chip2_peak_2720	chr10_117669500_117669700	chr10	117669500	117669700	70574	Cpm
4553	chr13	63046600	63046800	200	112.386	2.03997	0.000460326	0.589885	chip2_peak_7444	chr13_63046600_63046800	chr13	63046600	63046800	72061	2010111I01Rik
225	chr3	95299100	95299400	300	112.389	2.04002	3.93e-06	0.0767729	chip2_peak_405	chr3_95299100_95299400	chr3	95299100	95299400	71790	Anxa9
3656	chr13	46725200	46725400	200	112.395	2.04012	0.000353276	0.55911	chip2_peak_5979	chr13_46725200_46725400	chr13	46725200	46725400	218210	Nup153
2930	chr9	53617600	53617900	300	112.401	2.04023	0.000268563	0.521694	chip2_peak_4805	chr9_53617600_53617900	chr9	53617600	53617900	75717	Cul5
1965	chr15	98772700	98772900	200	112.414	2.04048	0.00015423	0.438551	chip2_peak_3211	chr15_98772700_98772900	chr15	98772700	98772900	22410	Wnt10b
774	chr15	12817700	12818200	500	112.423	2.04064	3.83e-05	0.258315	chip2_peak_1289	chr15_12817700_12818200	chr15	12817700	12818200	77877	6030458C11Rik
5088	chr1	21530700	21531000	300	112.434	2.04084	0.000526892	0.604209	chip2_peak_8341	chr1_21530700_21531000	chr1	21530700	21531000	226922	Kcnq5
2647	chr17	70848200	70848400	200	112.471	2.0415	0.000233492	0.498924	chip2_peak_4340	chr17_70848200_70848400	chr17	70848200	70848400	21815	Tgif1
8553	chr15	85760200	85760400	200	112.472	2.04152	0.000958155	0.657603	chip2_peak_14324	chr15_85760200_85760400	chr15	85760200	85760400	19013	Ppara
1605	chr9	60795100	60795300	200	112.483	2.04172	0.000114045	0.395151	chip2_peak_2617	chr9_60795100_60795300	chr9	60795100	60795300	72565	Uaca
509	chr13	45000800	45001100	300	112.501	2.04206	1.98e-05	0.191282	chip2_peak_874	chr13_45000800_45001100	chr13	45000800	45001100	94245	Dtnbp1
2486	chr17	81495800	81496100	300	112.531	2.04259	0.000214937	0.488455	chip2_peak_4071	chr17_81495800_81496100	chr17	81495800	81496100	20541	Slc8a1
8592	chr6	116131900	116132100	200	112.531	2.0426	0.000963129	0.657711	chip2_peak_14393	chr6_116131900_116132100	chr6	116131900	116132100	330401	Tmcc1
1494	chr5	123670000	123670200	200	112.58	2.04349	0.000101958	0.379614	chip2_peak_2432	chr5_123670000_123670200	chr5	123670000	123670200	269713	Clip2
3431	chr17	33649900	33650100	200	112.594	2.04373	0.00032749	0.549917	chip2_peak_5607	chr17_33649900_33650100	chr17	33649900	33650100	76936	Hnrnpm
7240	chr1	55215500	55215700	200	112.602	2.04388	0.000791321	0.644502	chip2_peak_11987	chr1_55215500_55215700	chr1	55215500	55215700	74013	Rftn2
4960	chr7	78290200	78290500	300	112.617	2.04416	0.000509481	0.600294	chip2_peak_8115	chr7_78290200_78290500	chr7	78290200	78290500	18213	Ntrk3
721	chr2	93446800	93447000	200	112.622	2.04424	3.42e-05	0.244605	chip2_peak_1206	chr2_93446800_93447000	chr2	93446800	93447000	12521	Cd82
2169	chr2	3714300	3714500	200	112.628	2.04435	0.000177872	0.458914	chip2_peak_3564	chr2_3714300_3714500	chr2	3714300	3714500	66540	Fam107b
4406	chr5	36369000	36369200	200	112.636	2.04449	0.00044435	0.587415	chip2_peak_7194	chr5_36369000_36369200	chr5	36369000	36369200	81840	Sorcs2
193	chr2	128832900	128833600	700	112.643	2.04463	2.75e-06	0.0630143	chip2_peak_349	chr2_128832900_128833600	chr2	128832900	128833600	72477	Tmem87b
8502	chr6	58633700	58633900	200	112.675	2.04522	0.000952751	0.657291	chip2_peak_14244	chr6_58633700_58633900	chr6	58633700	58633900	26357	Abcg2
191	chr12	79762500	79763000	500	112.7	2.04565	2.67e-06	0.062102	chip2_peak_341	chr12_79762500_79763000	chr12	79762500	79763000	19363	Rad51b
2016	chr10	20486300	20486500	200	112.708	2.0458	0.000160032	0.442487	chip2_peak_3306	chr10_20486300_20486500	chr10	20486300	20486500	29863	Pde7b
1553	chr1	182958600	182958800	200	112.714	2.04592	0.000107876	0.386054	chip2_peak_2528	chr1_182958600_182958800	chr1	182958600	182958800	53791	Tlr5
6680	chr7	98084400	98084600	200	112.729	2.0462	0.000720478	0.636268	chip2_peak_11018	chr7_98084400_98084600	chr7	98084400	98084600	17921	Myo7a
243	chr13	37858100	37858300	200	112.754	2.04664	4.43e-06	0.0823677	chip2_peak_431	chr13_37858100_37858300	chr13	37858100	37858300	68750	Rreb1
52	chr9	99390500	99391100	600	112.775	2.04702	8.24e-08	0.00672509	chip2_peak_90	chr9_99390500_99391100	chr9	99390500	99391100	17532	Mras
580	chr18	10580900	10581200	300	112.775	2.04703	2.47e-05	0.211593	chip2_peak_997	chr18_10580900_10581200	chr18	10580900	10581200	77805	Esco1
3536	chr19	55771100	55771300	200	112.83	2.04803	0.000339641	0.554802	chip2_peak_5774	chr19_55771100_55771300	chr19	55771100	55771300	21416	Tcf7l2
2499	chr13	34316900	34317100	200	112.835	2.04812	0.000217752	0.490794	chip2_peak_4100	chr13_34316900_34317100	chr13	34316900	34317100	73102	Slc22a23
2610	chr2	164770200	164770400	200	112.858	2.04853	0.00022933	0.496813	chip2_peak_4284	chr2_164770200_164770400	chr2	164770200	164770400	68612	Ube2c
6969	chr11	77028000	77028200	200	112.862	2.0486	0.000756479	0.641155	chip2_peak_11516	chr11_77028000_77028200	chr11	77028000	77028200	15567	Slc6a4
8354	chr11	77518600	77518800	200	112.868	2.04872	0.000931803	0.654719	chip2_peak_13970	chr11_77518600_77518800	chr11	77518600	77518800	67477	Abhd15
8582	chr4	19703800	19704000	200	112.897	2.04923	0.000962311	0.657711	chip2_peak_14377	chr4_19703800_19704000	chr4	19703800	19704000	107568	Wwp1
8514	chr6	116647200	116647400	200	112.906	2.04941	0.00095479	0.657417	chip2_peak_14269	chr6_116647200_116647400	chr6	116647200	116647400	213391	Rassf4
1908	chr13	97251800	97252000	200	112.911	2.0495	0.000147683	0.434217	chip2_peak_3103	chr13_97251800_97252000	chr13	97251800	97252000	13803	Enc1
1547	chr18	16806500	16806700	200	112.916	2.04958	0.000107417	0.386054	chip2_peak_2514	chr18_16806500_16806700	chr18	16806500	16806700	12558	Cdh2
7464	chr1	184034800	184035000	200	112.993	2.05098	0.000818529	0.647394	chip2_peak_12370	chr1_184034800_184035000	chr1	184034800	184035000	63953	Dusp10
461	chr9	121830300	121830600	300	113.004	2.05118	1.64e-05	0.176188	chip2_peak_784	chr9_121830300_121830600	chr9	121830300	121830600	100502861	Ccdc13
4937	chr2	153445200	153445400	200	113.004	2.05119	0.000507658	0.600207	chip2_peak_8084	chr2_153445200_153445400	chr2	153445200	153445400	329540	Nol4l
8056	chr10	86296000	86296200	200	113.02	2.05148	0.000892411	0.65218	chip2_peak_13434	chr10_86296000_86296200	chr10	86296000	86296200	27204	Syn3
4117	chr11	88840500	88840700	200	113.026	2.05157	0.000408082	0.575187	chip2_peak_6725	chr11_88840500_88840700	chr11	88840500	88840700	11640	Akap1
878	chr11	101752300	101752700	400	113.031	2.05168	4.63e-05	0.280747	chip2_peak_1443	chr11_101752300_101752700	chr11	101752300	101752700	217207	Dhx8
4360	chr11	65820300	65820700	400	113.066	2.0523	0.000439429	0.585682	chip2_peak_7127	chr11_65820300_65820700	chr11	65820300	65820700	52712	Zkscan6
4647	chr16	46476100	46476300	200	113.077	2.05251	0.000472475	0.592894	chip2_peak_7602	chr16_46476100_46476300	chr16	46476100	46476300	58998	Pvrl3
1035	chr2	64966900	64967100	200	113.118	2.05325	6.25e-05	0.322476	chip2_peak_1708	chr2_64966900_64967100	chr2	64966900	64967100	50915	Grb14
2399	chr14	26651900	26652100	200	113.178	2.05433	0.000205694	0.482695	chip2_peak_3945	chr14_26651900_26652100	chr14	26651900	26652100	11843	Arf4
5536	chr5	124872100	124872300	200	113.24	2.05546	0.000578543	0.614095	chip2_peak_9091	chr5_124872100_124872300	chr5	124872100	124872300	269704	Zfp664
5835	chr8	87695500	87695700	200	113.245	2.05555	0.000615773	0.622234	chip2_peak_9583	chr8_87695500_87695700	chr8	87695500	87695700	94187	Zfp423
3267	chr17	35835700	35836000	300	113.245	2.05556	0.000306055	0.537025	chip2_peak_5347	chr17_35835700_35836000	chr17	35835700	35836000	22154	Tubb5
1635	chr17	72132200	72132500	300	113.245	2.05556	0.000117211	0.399781	chip2_peak_2661	chr17_72132200_72132500	chr17	72132200	72132500	11682	Alk
2275	chr12	59130000	59130200	200	113.261	2.05585	0.000189095	0.468495	chip2_peak_3720	chr12_59130000_59130200	chr12	59130000	59130200	217615	Ctage5
1574	chr18	38590300	38590500	200	113.274	2.05609	0.000110159	0.389007	chip2_peak_2567	chr18_38590300_38590500	chr18	38590300	38590500	24066	Spry4
145	chr19	3367100	3367500	400	113.29	2.05637	1.39e-06	0.0419048	chip2_peak_265	chr19_3367100_3367500	chr19	3367100	3367500	12894	Cpt1a
3690	chr9	53389200	53389400	200	113.32	2.05692	0.000357248	0.56046	chip2_peak_6029	chr9_53389200_53389400	chr9	53389200	53389400	68304	Kdelc2
657	chr8	18935500	18935900	400	113.334	2.05717	2.97e-05	0.230109	chip2_peak_1110	chr8_18935500_18935900	chr8	18935500	18935900	319581	Xkr5
3705	chr3	121763100	121763300	200	113.339	2.05725	0.000359314	0.560808	chip2_peak_6060	chr3_121763100_121763300	chr3	121763100	121763300	19299	Abcd3
667	chr4	32537300	32537500	200	113.348	2.05743	3.01e-05	0.231063	chip2_peak_1121	chr4_32537300_32537500	chr4	32537300	32537500	12014	Bach2
4208	chr15	31365000	31365200	200	113.351	2.05747	0.000420626	0.580502	chip2_peak_6877	chr15_31365000_31365200	chr15	31365000	31365200	67434	Ankrd33b
912	chr19	53313500	53313700	200	113.377	2.05795	4.93e-05	0.289302	chip2_peak_1499	chr19_53313500_53313700	chr19	53313500	53313700	17859	Mxi1
4428	chr5	123077000	123077300	300	113.428	2.05888	0.000446738	0.587543	chip2_peak_7232	chr5_123077000_123077300	chr5	123077000	123077300	330189	Tmem120b
934	chr16	43393400	43393700	300	113.429	2.0589	5.12e-05	0.294625	chip2_peak_1529	chr16_43393400_43393700	chr16	43393400	43393700	56490	Zbtb20
3006	chr5	30982400	30982600	200	113.46	2.05945	0.000277482	0.525612	chip2_peak_4934	chr5_30982400_30982600	chr5	30982400	30982600	102465191	Mir6369
2635	chr4	123663100	123663300	200	113.476	2.05976	0.000231896	0.498332	chip2_peak_4320	chr4_123663100_123663300	chr4	123663100	123663300	11426	Macf1
8255	chr16	43551100	43551300	200	113.49	2.06	0.000921095	0.65458	chip2_peak_13782	chr16_43551100_43551300	chr16	43551100	43551300	56490	Zbtb20
1631	chr11	115295800	115296000	200	113.502	2.06022	0.00011692	0.399781	chip2_peak_2657	chr11_115295800_115296000	chr11	115295800	115296000	328035	Fads6
8366	chr19	31747100	31747300	200	113.505	2.06027	0.000933469	0.654834	chip2_peak_13994	chr19_31747100_31747300	chr19	31747100	31747300	19091	Prkg1
160	chr6	147064300	147064600	300	113.506	2.0603	1.74e-06	0.0480222	chip2_peak_286	chr6_147064300_147064600	chr6	147064300	147064600	232536	Mrps35
7803	chr2	154810700	154810900	200	113.516	2.06048	0.000864819	0.651913	chip2_peak_12977	chr2_154810700_154810900	chr2	154810700	154810900	19383	Raly
3720	chr11	26184200	26184500	300	113.518	2.06052	0.00036107	0.561464	chip2_peak_6086	chr11_26184200_26184500	chr11	26184200	26184500	70626	5730522E02Rik
7664	chr11	58980500	58980700	200	113.532	2.06076	0.000842492	0.649182	chip2_peak_12700	chr11_58980500_58980700	chr11	58980500	58980700	94091	Trim11
7698	chr8	121626500	121626700	200	113.536	2.06084	0.000847717	0.649849	chip2_peak_12776	chr8_121626500_121626700	chr8	121626500	121626700	142682	Zcchc14
4915	chr7	81230000	81230200	200	113.536	2.06084	0.000505886	0.600109	chip2_peak_8053	chr7_81230000_81230200	chr7	81230000	81230200	18584	Pde8a
739	chr16	43130600	43130900	300	113.557	2.06122	3.57e-05	0.250176	chip2_peak_1235	chr16_43130600_43130900	chr16	43130600	43130900	56490	Zbtb20
7136	chr4	126429000	126429200	200	113.615	2.06227	0.000779598	0.643976	chip2_peak_11796	chr4_126429000_126429200	chr4	126429000	126429200	214150	Ago3
1350	chr8	34808700	34808900	200	113.632	2.06258	8.79e-05	0.358761	chip2_peak_2195	chr8_34808700_34808900	chr8	34808700	34808900	319520	Dusp4
560	chr6	115470300	115470500	200	113.643	2.06279	2.34e-05	0.207016	chip2_peak_964	chr6_115470300_115470500	chr6	115470300	115470500	19016	Pparg
6203	chr4	11547000	11547200	200	113.654	2.06298	0.000660557	0.628307	chip2_peak_10208	chr4_11547000_11547200	chr4	11547000	11547200	66185	1110037F02Rik
3287	chr19	40463800	40464000	200	113.66	2.06309	0.000308434	0.538585	chip2_peak_5374	chr19_40463800_40464000	chr19	40463800	40464000	20411	Sorbs1
7376	chr4	155554700	155555100	400	113.681	2.06346	0.000808054	0.646243	chip2_peak_12207	chr4_155554700_155555100	chr4	155554700	155555100	14688	Gnb1
2093	chr1	134358800	134359000	200	113.687	2.06357	0.000168603	0.450142	chip2_peak_3437	chr1_134358800_134359000	chr1	134358800	134359000	57439	Tmem183a
7830	chr1	158355900	158356200	300	113.691	2.06366	0.000867407	0.651913	chip2_peak_13019	chr1_158355900_158356200	chr1	158355900	158356200	240843	Brinp2
137	chr12	70283300	70283700	400	113.738	2.06451	1.2e-06	0.0380242	chip2_peak_254	chr12_70283300_70283700	chr12	70283300	70283700	94090	Trim9
1088	chr2	32256900	32257200	300	113.743	2.06459	6.75e-05	0.332202	chip2_peak_1795	chr2_32256900_32257200	chr2	32256900	32257200	22245	Uck1
716	chr8	85511900	85512300	400	113.743	2.0646	3.39e-05	0.24335	chip2_peak_1201	chr8_85511900_85512300	chr8	85511900	85512300	108682	Gpt2
7612	chr17	79354400	79354600	200	113.75	2.06473	0.000834458	0.648361	chip2_peak_12605	chr17_79354400_79354600	chr17	79354400	79354600	260409	Cdc42ep3
2573	chr17	71243700	71243900	200	113.763	2.06496	0.000224149	0.492714	chip2_peak_4218	chr17_71243700_71243900	chr17	71243700	71243900	64898	Lpin2
8062	chr7	100637700	100637900	200	113.803	2.06568	0.000893502	0.652302	chip2_peak_13450	chr7_100637700_100637900	chr7	100637700	100637900	19346	Rab6a
199	chr9	57541500	57541800	300	113.824	2.06607	3.02e-06	0.0668143	chip2_peak_358	chr9_57541500_57541800	chr9	57541500	57541800	78323	Fam219b
4716	chr3	95269900	95270100	200	113.87	2.06691	0.000479132	0.593161	chip2_peak_7713	chr3_95269900_95270100	chr3	95269900	95270100	229589	Prune
3417	chr4	155651600	155651800	200	113.904	2.06752	0.000325728	0.549001	chip2_peak_5583	chr4_155651600_155651800	chr4	155651600	155651800	26561	Mmp23
7281	chr11	74707100	74707300	200	113.909	2.06761	0.000795773	0.64519	chip2_peak_12050	chr11_74707100_74707300	chr11	74707100	74707300	18472	Pafah1b1
4084	chr5	115348300	115348500	200	113.923	2.06786	0.000403065	0.573505	chip2_peak_6657	chr5_115348300_115348500	chr5	115348300	115348500	12861	Cox6a1
5934	chr6	98978900	98979100	200	113.943	2.06822	0.000630229	0.624864	chip2_peak_9771	chr6_98978900_98979100	chr6	98978900	98979100	108655	Foxp1
5668	chr17	12455500	12455700	200	113.972	2.06874	0.000594802	0.617552	chip2_peak_9307	chr17_12455500_12455700	chr17	12455500	12455700	20519	Slc22a3
4229	chr17	71229800	71230000	200	113.972	2.06875	0.000423884	0.581777	chip2_peak_6911	chr17_71229800_71230000	chr17	71229800	71230000	64898	Lpin2
8390	chr14	7945400	7945600	200	114.017	2.06956	0.00093707	0.655357	chip2_peak_14042	chr14_7945400_7945600	chr14	7945400	7945600	286940	Flnb
2407	chr2	69884200	69884400	200	114.065	2.07044	0.000207154	0.48392	chip2_peak_3961	chr2_69884200_69884400	chr2	69884200	69884400	75422	Mettl5
197	chr8	124713900	124714400	500	114.071	2.07056	2.95e-06	0.0660652	chip2_peak_355	chr8_124713900_124714400	chr8	124713900	124714400	234875	Ttc13
6790	chr11	8628500	8628700	200	114.074	2.0706	0.000734986	0.638436	chip2_peak_11217	chr11_8628500_8628700	chr11	8628500	8628700	319939	Tns3
67	chr7	30717400	30717600	200	114.079	2.07069	1.9e-07	0.0121329	chip2_peak_118	chr7_30717400_30717600	chr7	30717400	30717600	11944	Atp4a
6247	chr13	55523200	55523400	200	114.099	2.07106	0.000665771	0.628727	chip2_peak_10280	chr13_55523200_55523400	chr13	55523200	55523400	27261	Dok3
5095	chr11	3371000	3371200	200	114.105	2.07116	0.000527237	0.604209	chip2_peak_8351	chr11_3371000_3371200	chr11	3371000	3371200	100499518	Mir3470a
5096	chr11	3371000	3371200	200	114.105	2.07116	0.000527237	0.604209	chip2_peak_8351	chr11_3371000_3371200	chr11	3371000	3371200	16886	Limk2
675	chrX	100314600	100314800	200	114.106	2.07118	3.07e-05	0.232752	chip2_peak_1137	chrX_100314600_100314800	chrX	100314600	100314800	13607	Eda
5400	chr2	91930400	91930600	200	114.109	2.07125	0.000560995	0.610954	chip2_peak_8849	chr2_91930400_91930600	chr2	91930400	91930600	17242	Mdk
3349	chr18	12186600	12186800	200	114.142	2.07183	0.000316589	0.543589	chip2_peak_5472	chr18_12186600_12186800	chr18	12186600	12186800	76482	3110002H16Rik
2767	chr16	13363100	13363300	200	114.15	2.07199	0.000247668	0.507604	chip2_peak_4525	chr16_13363100_13363300	chr16	13363100	13363300	239719	Mkl2
25	chr19	3359700	3360100	400	114.172	2.07238	1e-08	0.00174926	chip2_peak_39	chr19_3359700_3360100	chr19	3359700	3360100	12894	Cpt1a
583	chr6	116653800	116654200	400	114.225	2.07334	2.5e-05	0.213129	chip2_peak_1002	chr6_116653800_116654200	chr6	116653800	116654200	213391	Rassf4
3605	chr14	121298300	121298500	200	114.256	2.07391	0.000347362	0.556528	chip2_peak_5899	chr14_121298300_121298500	chr14	121298300	121298500	223255	Stk24
3808	chr3	154921900	154922100	200	114.283	2.0744	0.000371872	0.566295	chip2_peak_6216	chr3_154921900_154922100	chr3	154921900	154922100	435766	Tnni3k
8052	chr15	85797600	85797800	200	114.29	2.07452	0.000891665	0.652021	chip2_peak_13426	chr15_85797600_85797800	chr15	85797600	85797800	19013	Ppara
2764	chr6	71813000	71813300	300	114.293	2.07457	0.000246769	0.50627	chip2_peak_4521	chr6_71813000_71813300	chr6	71813000	71813300	66223	Mrpl35
8828	chr12	87199600	87199800	200	114.306	2.07482	0.000996545	0.659811	chip2_peak_14864	chr12_87199600_87199800	chr12	87199600	87199800	382620	Tmed8
1386	chr19	5988900	5989400	500	114.339	2.07541	9.15e-05	0.36552	chip2_peak_2252	chr19_5988900_5989400	chr19	5988900	5989400	12333	Capn1
6390	chr2	135848200	135848400	200	114.408	2.07666	0.000684196	0.631338	chip2_peak_10537	chr2_135848200_135848400	chr2	135848200	135848400	18798	Plcb4
2652	chr2	105226000	105226300	300	114.423	2.07694	0.000234438	0.500012	chip2_peak_4351	chr2_105226000_105226300	chr2	105226000	105226300	74088	Them7
204	chr4	11575600	11575900	300	114.442	2.07728	3.18e-06	0.0684624	chip2_peak_370	chr4_11575600_11575900	chr4	11575600	11575900	623474	Rad54b
4272	chr9	21626500	21626700	200	114.442	2.07729	0.000428315	0.582396	chip2_peak_6979	chr9_21626500_21626700	chr9	21626500	21626700	20586	Smarca4
1846	chr1	74973700	74973900	200	114.485	2.07806	0.000140452	0.426765	chip2_peak_3000	chr1_74973700_74973900	chr1	74973700	74973900	75570	Nhej1
2010	chr13	97927500	97927800	300	114.508	2.07849	0.00015923	0.442283	chip2_peak_3297	chr13_97927500_97927800	chr13	97927500	97927800	110596	Arhgef28
3124	chr19	43824300	43824600	300	114.522	2.07874	0.000291189	0.531461	chip2_peak_5126	chr19_43824300_43824600	chr19	43824300	43824600	12780	Abcc2
12	chr11	120789700	120790200	500	114.537	2.07901	1.09e-09	0.000316277	chip2_peak_20	chr11_120789700_120790200	chr11	120789700	120790200	68730	Dus1l
8806	chr4	109430800	109431000	200	114.545	2.07914	0.000991453	0.659073	chip2_peak_14801	chr4_109430800_109431000	chr4	109430800	109431000	230603	Ttc39a
542	chr8	22508600	22508900	300	114.571	2.07962	2.21e-05	0.201571	chip2_peak_934	chr8_22508600_22508900	chr8	22508600	22508900	20516	Slc20a2
5057	chr14	16260000	16260200	200	114.599	2.08013	0.000522762	0.603255	chip2_peak_8286	chr14_16260000_16260200	chr14	16260000	16260200	59007	Ngly1
2643	chr5	117319300	117319500	200	114.621	2.08054	0.000232851	0.498621	chip2_peak_4333	chr5_117319300_117319500	chr5	117319300	117319500	231668	Vsig10
3482	chr2	125764500	125764700	200	114.63	2.0807	0.000333338	0.551899	chip2_peak_5690	chr2_125764500_125764700	chr2	125764500	125764700	70354	Secisbp2l
2279	chr12	83885800	83886100	300	114.661	2.08125	0.000189867	0.469613	chip2_peak_3728	chr12_83885800_83886100	chr12	83885800	83886100	18222	Numb
5278	chr4	97779600	97779800	200	114.664	2.08132	0.000545889	0.607463	chip2_peak_8641	chr4_97779600_97779800	chr4	97779600	97779800	18027	Nfia
7365	chr3	13866400	13866600	200	114.671	2.08143	0.000806823	0.646243	chip2_peak_12190	chr3_13866400_13866600	chr3	13866400	13866600	76897	Ralyl
903	chr19	45902300	45902800	500	114.703	2.08203	4.85e-05	0.286996	chip2_peak_1484	chr19_45902300_45902800	chr19	45902300	45902800	71617	9130011E15Rik
490	chr10	43930200	43930800	600	114.73	2.08251	1.85e-05	0.185257	chip2_peak_842	chr10_43930200_43930800	chr10	43930200	43930800	170728	Rtn4ip1
2080	chr7	24594100	24594300	200	114.795	2.08369	0.00016761	0.450142	chip2_peak_3411	chr7_24594100_24594300	chr7	24594100	24594300	66071	Ethe1
1804	chr11	59834800	59835400	600	114.815	2.08406	0.000136685	0.423069	chip2_peak_2936	chr11_59834800_59835400	chr11	59834800	59835400	26572	Cops3
267	chr7	114362200	114362500	300	114.829	2.0843	5.56e-06	0.0962309	chip2_peak_469	chr7_114362200_114362500	chr7	114362200	114362500	71045	4933406I18Rik
8030	chr5	76964800	76965000	200	114.829	2.08431	0.000889173	0.651913	chip2_peak_13386	chr5_76964800_76965000	chr5	76964800	76965000	67054	Paics
605	chr8	85513000	85513300	300	114.845	2.08459	2.66e-05	0.218114	chip2_peak_1037	chr8_85513000_85513300	chr8	85513000	85513300	108682	Gpt2
4238	chr5	24757200	24757400	200	114.85	2.08469	0.000424737	0.581881	chip2_peak_6923	chr5_24757200_24757400	chr5	24757200	24757400	214301	Crygn
6585	chr4	95743200	95743400	200	114.853	2.08474	0.000707783	0.633695	chip2_peak_10866	chr4_95743200_95743400	chr4	95743200	95743400	75578	Fggy
2241	chr1	86590400	86590600	200	114.853	2.08475	0.000186163	0.465605	chip2_peak_3685	chr1_86590400_86590600	chr1	86590400	86590600	26895	Cops7b
6873	chr17	86780400	86780600	200	114.857	2.08482	0.000743773	0.639086	chip2_peak_11350	chr17_86780400_86780600	chr17	86780400	86780600	13819	Epas1
7301	chr13	34188200	34188400	200	114.859	2.08485	0.000798193	0.645299	chip2_peak_12082	chr13_34188200_34188400	chr13	34188200	34188400	73102	Slc22a23
358	chr1	106758700	106759000	300	114.875	2.08514	9.21e-06	0.128164	chip2_peak_605	chr1_106758700_106759000	chr1	106758700	106759000	70750	Kdsr
4087	chr8	77310100	77310300	200	114.877	2.08519	0.000403213	0.573505	chip2_peak_6662	chr8_77310100_77310300	chr8	77310100	77310300	78514	Arhgap10
7788	chr15	101190600	101190800	200	114.885	2.08532	0.000862528	0.651913	chip2_peak_12947	chr15_101190600_101190800	chr15	101190600	101190800	11479	Acvr1b
5081	chr3	146617900	146618100	200	114.91	2.08577	0.000525524	0.60409	chip2_peak_8323	chr3_146617900_146618100	chr3	146617900	146618100	22262	Uox
495	chr18	11641000	11641300	300	114.917	2.08591	1.88e-05	0.187196	chip2_peak_847	chr18_11641000_11641300	chr18	11641000	11641300	225182	Rbbp8
1934	chr9	46099200	46099400	200	114.931	2.08615	0.000150888	0.437113	chip2_peak_3149	chr9_46099200_46099400	chr9	46099200	46099400	70661	Sik3
3985	chr5	143503000	143503200	200	114.94	2.08632	0.000390522	0.569938	chip2_peak_6484	chr5_143503000_143503200	chr5	143503000	143503200	231871	Daglb
5844	chr9	45345500	45345800	300	114.945	2.08642	0.000618025	0.622723	chip2_peak_9606	chr9_45345500_45345800	chr9	45345500	45345800	435845	Tmprss11c
7758	chr13	49342400	49342700	300	114.972	2.08691	0.00085747	0.651614	chip2_peak_12899	chr13_49342400_49342700	chr13	49342400	49342700	76895	Bicd2
975	chr13	100005600	100006100	500	114.987	2.08718	5.52e-05	0.302147	chip2_peak_1609	chr13_100005600_100006100	chr13	100005600	100006100	78038	Mccc2
1710	chr11	45943500	45943700	200	114.988	2.08719	0.000125411	0.4096	chip2_peak_2776	chr11_45943500_45943700	chr11	45943500	45943700	72290	Lsm11
2180	chr8	34933100	34933400	300	115.004	2.08749	0.000179045	0.459926	chip2_peak_3579	chr8_34933100_34933400	chr8	34933100	34933400	21951	Tnks
6394	chr12	91673100	91673300	200	115.017	2.08772	0.000684998	0.631413	chip2_peak_10546	chr12_91673100_91673300	chr12	91673100	91673300	108800	Ston2
1489	chr10	128891300	128891600	300	115.018	2.08774	0.000101502	0.379038	chip2_peak_2422	chr10_128891300_128891600	chr10	128891300	128891600	14561	Gdf11
741	chr7	112316200	112316600	400	115.035	2.08805	3.59e-05	0.250944	chip2_peak_1238	chr7_112316200_112316600	chr7	112316200	112316600	320878	Mical2
6127	chr10	88495400	88495600	200	115.062	2.08853	0.000650706	0.62698	chip2_peak_10076	chr10_88495400_88495600	chr10	88495400	88495600	212862	Chpt1
4196	chr19	16579700	16580000	300	115.063	2.08855	0.000419926	0.580502	chip2_peak_6860	chr19_16579700_16580000	chr19	16579700	16580000	14675	Gna14
184	chr12	3390900	3391200	300	115.151	2.09016	2.55e-06	0.0605945	chip2_peak_331	chr12_3390900_3391200	chr12	3390900	3391200	16570	Kif3c
2121	chr15	27850900	27851100	200	115.161	2.09034	0.000171686	0.453113	chip2_peak_3481	chr15_27850900_27851100	chr15	27850900	27851100	223435	Trio
8015	chr16	72830500	72830700	200	115.182	2.09071	0.000887218	0.651913	chip2_peak_13355	chr16_72830500_72830700	chr16	72830500	72830700	19876	Robo1
6874	chr6	77475800	77476000	200	115.208	2.09118	0.000744255	0.639086	chip2_peak_11357	chr6_77475800_77476000	chr6	77475800	77476000	12386	Ctnna2
2405	chr8	104387600	104387900	300	115.283	2.09255	0.0002068	0.483606	chip2_peak_3955	chr8_104387600_104387900	chr8	104387600	104387900	97487	Cmtm4
6869	chr11	117339000	117339200	200	115.283	2.09255	0.000743291	0.639057	chip2_peak_11345	chr11_117339000_117339200	chr11	117339000	117339200	53860	2023-09-09
8089	chr3	89355800	89356000	200	115.294	2.09275	0.00089876	0.653496	chip2_peak_13500	chr3_89355800_89356000	chr3	89355800	89356000	77772	Dcst1
8037	chr7	73376700	73376900	200	115.303	2.0929	0.000889901	0.651913	chip2_peak_13400	chr7_73376700_73376900	chr7	73376700	73376900	244058	Rgma
3707	chr11	72467600	72467800	200	115.351	2.09379	0.000359644	0.560808	chip2_peak_6064	chr11_72467600_72467800	chr11	72467600	72467800	216892	Spns2
1578	chr4	114970700	114971300	600	115.412	2.09488	0.000110842	0.389901	chip2_peak_2578	chr4_114970700_114971300	chr4	114970700	114971300	66588	Cmpk1
8239	chr17	71240800	71241000	200	115.433	2.09527	0.000919388	0.65458	chip2_peak_13759	chr17_71240800_71241000	chr17	71240800	71241000	64898	Lpin2
578	chr1	30810700	30811000	300	115.45	2.09558	2.45e-05	0.210637	chip2_peak_993	chr1_30810700_30811000	chr1	30810700	30811000	213109	Phf3
2035	chr12	105688700	105689000	300	115.466	2.09587	0.000162011	0.443235	chip2_peak_3344	chr12_105688700_105689000	chr12	105688700	105689000	66787	Gskip
1415	chr5	24821600	24821900	300	115.492	2.09634	9.31e-05	0.36649	chip2_peak_2292	chr5_24821600_24821900	chr5	24821600	24821900	19744	Rheb
7239	chr4	129008000	129008200	200	115.496	2.09641	0.000791288	0.644502	chip2_peak_11986	chr4_129008000_129008200	chr4	129008000	129008200	11637	Ak2
2773	chr17	80243200	80243500	300	115.51	2.09666	0.00024787	0.507604	chip2_peak_4531	chr17_80243200_80243500	chr17	80243200	80243500	106794	Dhx57
893	chr6	22295200	22295500	300	115.52	2.09684	4.75e-05	0.28346	chip2_peak_1467	chr6_22295200_22295500	chr6	22295200	22295500	93735	Wnt16
8429	chr2	127255100	127255300	200	115.532	2.09707	0.000942788	0.65602	chip2_peak_14112	chr2_127255100_127255300	chr2	127255100	127255300	69470	Tmem127
210	chr2	164804000	164804300	300	115.537	2.09716	3.49e-06	0.0720055	chip2_peak_381	chr2_164804000_164804300	chr2	164804000	164804300	170789	Acot8
4260	chr17	11752900	11753100	200	115.541	2.09724	0.000426768	0.581881	chip2_peak_6957	chr17_11752900_11753100	chr17	11752900	11753100	50873	Park2
4670	chr13	92301700	92301900	200	115.554	2.09746	0.000474512	0.592894	chip2_peak_7639	chr13_92301700_92301900	chr13	92301700	92301900	17686	Msh3
2053	chr10	4712400	4712600	200	115.597	2.09824	0.000164006	0.445859	chip2_peak_3369	chr10_4712400_4712600	chr10	4712400	4712600	13982	Esr1
1504	chr3	116967200	116967500	300	115.685	2.09985	0.000102836	0.380202	chip2_peak_2448	chr3_116967200_116967500	chr3	116967200	116967500	114301	Palmd
3177	chr3	34649800	34650000	200	115.686	2.09986	0.000295759	0.532796	chip2_peak_5204	chr3_34649800_34650000	chr3	34649800	34650000	320478	Sox2ot
8326	chr10	90728200	90728400	200	115.689	2.09992	0.000928393	0.654659	chip2_peak_13921	chr10_90728200_90728400	chr10	90728200	90728400	77531	Anks1b
2797	chr19	6001600	6002000	400	115.757	2.10115	0.000250488	0.509093	chip2_peak_4567	chr19_6001600_6002000	chr19	6001600	6002000	12333	Capn1
5167	chr18	61716700	61716900	200	115.796	2.10186	0.000534993	0.605729	chip2_peak_8464	chr18_61716700_61716900	chr18	61716700	61716900	17714	Grpel2
1224	chr14	55520500	55520700	200	115.846	2.10277	7.66e-05	0.343114	chip2_peak_1988	chr14_55520500_55520700	chr14	55520500	55520700	18185	Nrl
2995	chr10	78211400	78211600	200	115.894	2.10364	0.000276197	0.525205	chip2_peak_4914	chr10_78211400_78211600	chr10	78211400	78211600	216131	Trappc10
7899	chr11	76292600	76292800	200	115.894	2.10365	0.000875171	0.651913	chip2_peak_13147	chr11_76292600_76292800	chr11	76292600	76292800	18230	Nxn
4495	chr1	188717100	188717300	200	115.908	2.1039	0.000453608	0.588348	chip2_peak_7344	chr1_188717100_188717300	chr1	188717100	188717300	22283	Ush2a
534	chr3	105705000	105705200	200	115.908	2.1039	2.16e-05	0.199964	chip2_peak_921	chr3_105705000_105705200	chr3	105705000	105705200	109050	Fam212b
822	chr4	99931900	99932100	200	115.913	2.10398	4.19e-05	0.269112	chip2_peak_1358	chr4_99931900_99932100	chr4	99931900	99932100	72157	Pgm2
6434	chr15	82332100	82332300	200	115.914	2.10399	0.000689883	0.632282	chip2_peak_10610	chr15_82332100_82332300	chr15	82332100	82332300	17939	Naga
640	chr2	135853100	135853500	400	115.939	2.10446	2.85e-05	0.226107	chip2_peak_1084	chr2_135853100_135853500	chr2	135853100	135853500	18798	Plcb4
8573	chr2	4253500	4253700	200	115.97	2.10502	0.000961243	0.657711	chip2_peak_14362	chr2_4253500_4253700	chr2	4253500	4253700	209630	Frmd4a
6107	chr11	51591900	51592300	400	115.98	2.10519	0.000648288	0.626538	chip2_peak_10041	chr11_51591900_51592300	chr11	51591900	51592300	72947	Phykpl
8401	chr14	75056900	75057100	200	115.986	2.1053	0.000938832	0.655357	chip2_peak_14063	chr14_75056900_75057100	chr14	75056900	75057100	100124475	Mir466f-3
3693	chr6	115558200	115558400	200	115.988	2.10535	0.000357416	0.56046	chip2_peak_6034	chr6_115558200_115558400	chr6	115558200	115558400	381802	Tsen2
8159	chr2	32163900	32164100	200	116.006	2.10567	0.000909311	0.65458	chip2_peak_13616	chr2_32163900_32164100	chr2	32163900	32164100	227723	Prrc2b
1798	chr11	75627000	75627200	200	116.021	2.10594	0.000136149	0.422635	chip2_peak_2928	chr11_75627000_75627200	chr11	75627000	75627200	18738	Pitpna
1119	chr12	36437100	36437500	400	116.033	2.10617	6.93e-05	0.333327	chip2_peak_1845	chr12_36437100_36437500	chr12	36437100	36437500	75847	Ispd
2064	chr5	88566500	88566700	200	116.048	2.10643	0.000165151	0.447365	chip2_peak_3383	chr5_88566500_88566700	chr5	88566500	88566700	52822	Rufy3
3475	chr13	41200400	41200600	200	116.051	2.10648	0.000332742	0.551899	chip2_peak_5680	chr13_41200400_41200600	chr13	41200400	41200600	54326	Elovl2
7595	chr7	112239100	112239300	200	116.101	2.10739	0.000833081	0.648347	chip2_peak_12580	chr7_112239100_112239300	chr7	112239100	112239300	320878	Mical2
724	chr5	120131600	120131900	300	116.122	2.10778	3.46e-05	0.246285	chip2_peak_1210	chr5_120131600_120131900	chr5	120131600	120131900	100503427	Gm10390
725	chr5	120131600	120131900	300	116.122	2.10778	3.46e-05	0.246285	chip2_peak_1210	chr5_120131600_120131900	chr5	120131600	120131900	74111	Rbm19
3326	chr12	111096100	111096300	200	116.133	2.10797	0.000312904	0.540282	chip2_peak_5436	chr12_111096100_111096300	chr12	111096100	111096300	217864	Rcor1
8309	chr3	129583900	129584100	200	116.134	2.10799	0.000926276	0.65458	chip2_peak_13880	chr3_129583900_129584100	chr3	129583900	129584100	170439	Elovl6
3089	chr12	4455800	4456000	200	116.144	2.10818	0.000288409	0.530927	chip2_peak_5071	chr12_4455800_4456000	chr12	4455800	4456000	17977	Ncoa1
3346	chr13	41201200	41201400	200	116.152	2.10832	0.000315894	0.543028	chip2_peak_5466	chr13_41201200_41201400	chr13	41201200	41201400	54326	Elovl2
8769	chr15	81181300	81181500	200	116.183	2.10889	0.000987162	0.658559	chip2_peak_14742	chr15_81181300_81181500	chr15	81181300	81181500	223701	Mkl1
3910	chr17	35906200	35906500	300	116.186	2.10894	0.000382276	0.568532	chip2_peak_6365	chr17_35906200_35906500	chr17	35906200	35906500	73242	Atat1
579	chr5	113146900	113147100	200	116.189	2.10899	2.46e-05	0.210641	chip2_peak_994	chr5_113146900_113147100	chr5	113146900	113147100	243219	2900026A02Rik
2796	chr14	55740100	55740400	300	116.2	2.10919	0.000250151	0.508919	chip2_peak_4565	chr14_55740100_55740400	chr14	55740100	55740400	52585	Dhrs1
2492	chr4	59870600	59870800	200	116.201	2.10922	0.000216277	0.490064	chip2_peak_4084	chr4_59870600_59870800	chr4	59870600	59870800	209131	Snx30
2999	chr11	6003300	6003500	200	116.209	2.10935	0.000276627	0.525295	chip2_peak_4923	chr11_6003300_6003500	chr11	6003300	6003500	12323	Camk2b
2294	chr3	55129000	55129200	200	116.221	2.10958	0.000192434	0.472291	chip2_peak_3758	chr3_55129000_55129200	chr3	55129000	55129200	229285	Spg20
5136	chr2	160760100	160760300	200	116.23	2.10975	0.000531377	0.605085	chip2_peak_8412	chr2_160760100_160760300	chr2	160760100	160760300	18803	Plcg1
152	chr8	106266300	106266600	300	116.232	2.10977	1.59e-06	0.0457302	chip2_peak_277	chr8_106266300_106266600	chr8	106266300	106266600	58994	Smpd3
394	chr9	109039200	109039500	300	116.237	2.10987	1.2e-05	0.151574	chip2_peak_661	chr9_109039200_109039500	chr9	109039200	109039500	66940	Shisa5
2189	chr15	79351100	79351400	300	116.258	2.11024	0.000180503	0.461815	chip2_peak_3596	chr15_79351100_79351400	chr15	79351100	79351400	17133	Maff
7665	chr15	7934200	7934400	200	116.273	2.11052	0.000842504	0.649182	chip2_peak_12701	chr15_7934200_7934400	chr15	7934200	7934400	545085	Wdr70
42	chr19	3370500	3371700	1200	116.279	2.11062	4.44e-08	0.00465176	chip2_peak_68	chr19_3370500_3371700	chr19	3370500	3371700	12894	Cpt1a
2322	chr15	80674600	80674800	200	116.295	2.11092	0.000196123	0.47575	chip2_peak_3804	chr15_80674600_80674800	chr15	80674600	80674800	213956	Fam83f
6757	chr19	45591800	45592000	200	116.302	2.11104	0.000731479	0.638436	chip2_peak_11162	chr19_45591800_45592000	chr19	45591800	45592000	30838	Fbxw4
1558	chr11	61245100	61245400	300	116.321	2.11138	0.00010817	0.386181	chip2_peak_2536	chr11_61245100_61245400	chr11	61245100	61245400	11671	Aldh3a2
4094	chr14	9608900	9609100	200	116.334	2.11163	0.000404256	0.573783	chip2_peak_6675	chr14_9608900_9609100	chr14	9608900	9609100	14198	Fhit
1751	chr14	62884600	62884800	200	116.347	2.11187	0.000130343	0.414377	chip2_peak_2852	chr14_62884600_62884800	chr14	62884600	62884800	268752	Wdfy2
4623	chr4	141067600	141067800	200	116.381	2.11248	0.000469514	0.592798	chip2_peak_7559	chr4_141067600_141067800	chr4	141067600	141067800	66147	Necap2
8517	chr9	121447600	121447800	200	116.426	2.11329	0.000954858	0.657417	chip2_peak_14273	chr9_121447600_121447800	chr9	121447600	121447800	67095	Trak1
5720	chr5	113105900	113106100	200	116.486	2.11439	0.000600362	0.618135	chip2_peak_9394	chr5_113105900_113106100	chr5	113105900	113106100	243219	2900026A02Rik
692	chr8	18762900	18763100	200	116.491	2.11448	3.2e-05	0.236765	chip2_peak_1165	chr8_18762900_18763100	chr8	18762900	18763100	244329	Mcph1
1561	chr18	12753100	12753300	200	116.497	2.11459	0.000108422	0.386574	chip2_peak_2541	chr18_12753100_12753300	chr18	12753100	12753300	71132	Cabyr
6912	chr9	50834200	50834400	200	116.508	2.11479	0.000748747	0.639915	chip2_peak_11422	chr9_50834200_50834400	chr9	50834200	50834400	102580	Alg9
1770	chr7	30741600	30741800	200	116.527	2.11514	0.000133189	0.418889	chip2_peak_2886	chr7_30741600_30741800	chr7	30741600	30741800	14447	Gapdhs
6802	chr8	25753400	25753600	200	116.528	2.11515	0.000736152	0.638436	chip2_peak_11236	chr8_25753400_25753600	chr8	25753400	25753600	72108	Ddhd2
2364	chr10	80957800	80958000	200	116.567	2.11585	0.000200775	0.478582	chip2_peak_3878	chr10_80957800_80958000	chr10	80957800	80958000	14708	Gng7
5266	chr16	31423800	31424000	200	116.568	2.11588	0.000544979	0.60739	chip2_peak_8624	chr16_31423800_31424000	chr16	31423800	31424000	71911	Bdh1
5575	chr8	3439600	3439800	200	116.619	2.11679	0.000585179	0.616383	chip2_peak_9162	chr8_3439600_3439800	chr8	3439600	3439800	102098	Arhgef18
2095	chr1	38055300	38055500	200	116.677	2.11786	0.000168664	0.450142	chip2_peak_3441	chr1_38055300_38055500	chr1	38055300	38055500	226982	Eif5b
2096	chr1	38055300	38055500	200	116.677	2.11786	0.000168664	0.450142	chip2_peak_3441	chr1_38055300_38055500	chr1	38055300	38055500	56210	Rev1
8491	chr1	172274700	172274900	200	116.679	2.11789	0.000950987	0.656835	chip2_peak_14225	chr1_172274700_172274900	chr1	172274700	172274900	98660	Atp1a2
907	chr7	68320500	68320700	200	116.681	2.11792	4.9e-05	0.288505	chip2_peak_1492	chr7_68320500_68320700	chr7	68320500	68320700	434197	Fam169b
8726	chr5	36374200	36374400	200	116.688	2.11805	0.00098045	0.658047	chip2_peak_14646	chr5_36374200_36374400	chr5	36374200	36374400	81840	Sorcs2
7481	chr7	110818800	110819000	200	116.701	2.11829	0.00082085	0.647586	chip2_peak_12402	chr7_110818800_110819000	chr7	110818800	110819000	67150	Rnf141
5114	chr17	71248700	71248900	200	116.718	2.1186	0.000529116	0.60498	chip2_peak_8376	chr17_71248700_71248900	chr17	71248700	71248900	64898	Lpin2
4375	chr18	39292800	39293000	200	116.728	2.11879	0.000440961	0.586004	chip2_peak_7151	chr18_39292800_39293000	chr18	39292800	39293000	71302	Arhgap26
3109	chr18	65057600	65057800	200	116.74	2.11899	0.000290052	0.531461	chip2_peak_5103	chr18_65057600_65057800	chr18	65057600	65057800	83814	Nedd4l
350	chr2	103473900	103474500	600	116.746	2.1191	8.98e-06	0.126783	chip2_peak_595	chr2_103473900_103474500	chr2	103473900	103474500	17339	Mip
4407	chr1	135461300	135461500	200	116.761	2.11937	0.000444442	0.587453	chip2_peak_7195	chr1_135461300_135461500	chr1	135461300	135461500	215690	Nav1
3841	chr3	62456600	62456900	300	116.782	2.11975	0.000375112	0.566396	chip2_peak_6267	chr3_62456600_62456900	chr3	62456600	62456900	622434	Arhgef26
619	chr14	7840500	7840800	300	116.783	2.11978	2.77e-05	0.223794	chip2_peak_1058	chr14_7840500_7840800	chr14	7840500	7840800	286940	Flnb
65	chr11	3984300	3984700	400	116.788	2.11987	1.77e-07	0.0113668	chip2_peak_116	chr11_3984300_3984700	chr11	3984300	3984700	53897	Gal3st1
344	chr17	71242600	71243300	700	116.813	2.12031	8.6e-06	0.123215	chip2_peak_584	chr17_71242600_71243300	chr17	71242600	71243300	64898	Lpin2
5015	chr4	36181900	36182100	200	116.858	2.12114	0.000516734	0.602007	chip2_peak_8211	chr4_36181900_36182100	chr4	36181900	36182100	242384	Lingo2
305	chr15	89425700	89426200	500	116.859	2.12115	7.37e-06	0.114717	chip2_peak_529	chr15_89425700_89426200	chr15	89425700	89426200	100134861	ChkbCpt1b
306	chr15	89425700	89426200	500	116.859	2.12115	7.37e-06	0.114717	chip2_peak_529	chr15_89425700_89426200	chr15	89425700	89426200	12895	Cpt1b
8728	chr7	25229000	25229200	200	116.86	2.12117	0.00098087	0.658047	chip2_peak_14651	chr7_25229000_25229200	chr7	25229000	25229200	606496	Gsk3a
8729	chr7	25229000	25229200	200	116.86	2.12117	0.00098087	0.658047	chip2_peak_14651	chr7_25229000_25229200	chr7	25229000	25229200	77124	9130221H12Rik
3527	chr15	76900900	76901100	200	116.92	2.12226	0.000338668	0.554362	chip2_peak_5759	chr15_76900900_76901100	chr15	76900900	76901100	66398	Commd5
2938	chr16	33941400	33941700	300	116.921	2.12228	0.000269409	0.522099	chip2_peak_4817	chr16_33941400_33941700	chr16	33941400	33941700	16419	Itgb5
6494	chr11	97181000	97181200	200	116.947	2.12274	0.000697019	0.632319	chip2_peak_10717	chr11_97181000_97181200	chr11	97181000	97181200	16211	Kpnb1
7557	chr6	120167800	120168000	200	116.949	2.1228	0.000828568	0.648074	chip2_peak_12521	chr6_120167800_120168000	chr6	120167800	120168000	29862	Ninj2
4554	chr1	127595700	127595900	200	116.993	2.12359	0.00046066	0.590049	chip2_peak_7446	chr1_127595700_127595900	chr1	127595700	127595900	72160	Tmem163
2026	chr8	124810700	124811000	300	116.999	2.1237	0.000160936	0.442487	chip2_peak_3330	chr8_124810700_124811000	chr8	124810700	124811000	330863	Trim67
6720	chr2	121440100	121440300	200	117.036	2.12436	0.000727484	0.63839	chip2_peak_11093	chr2_121440100_121440300	chr2	121440100	121440300	269344	Ell3
3194	chr8	106839500	106839800	300	117.049	2.1246	0.000297399	0.533462	chip2_peak_5231	chr8_106839500_106839800	chr8	106839500	106839800	272538	Tango6
4455	chr13	60709700	60710000	300	117.051	2.12464	0.000449232	0.587543	chip2_peak_7270	chr13_60709700_60710000	chr13	60709700	60710000	69635	Dapk1
6104	chr9	62361300	62361500	200	117.062	2.12483	0.000648137	0.626538	chip2_peak_10036	chr9_62361300_62361500	chr9	62361300	62361500	11737	Anp32a
3233	chr11	60246300	60246500	200	117.086	2.12528	0.000302098	0.535649	chip2_peak_5287	chr11_60246300_60246500	chr11	60246300	60246500	216810	Tom1l2
4732	chr2	152794600	152794900	300	117.09	2.12534	0.000479991	0.593161	chip2_peak_7731	chr2_152794600_152794900	chr2	152794600	152794900	12048	Bcl2l1
2435	chr17	10738300	10738600	300	117.102	2.12557	0.000210059	0.485665	chip2_peak_4002	chr17_10738300_10738600	chr17	10738300	10738600	69310	Pacrg
7852	chr19	40247400	40247600	200	117.115	2.12581	0.000870083	0.651913	chip2_peak_13060	chr19_40247400_40247600	chr19	40247400	40247600	54132	Pdlim1
1592	chr6	108509100	108509300	200	117.123	2.12595	0.000112245	0.391799	chip2_peak_2599	chr6_108509100_108509300	chr6	108509100	108509300	16438	Itpr1
1503	chr5	17824800	17825100	300	117.141	2.12628	0.000102746	0.380202	chip2_peak_2446	chr5_17824800_17825100	chr5	17824800	17825100	12491	Cd36
4002	chrX	36126600	36126800	200	117.155	2.12653	0.00039303	0.570441	chip2_peak_6520	chrX_36126600_36126800	chrX	36126600	36126800	16164	Il13ra1
3035	chr5	66125200	66125400	200	117.157	2.12656	0.000280996	0.526737	chip2_peak_4981	chr5_66125200_66125400	chr5	66125200	66125400	245945	Rbm47
2926	chr7	6144500	6144700	200	117.166	2.12673	0.000267947	0.521121	chip2_peak_4799	chr7_6144500_6144700	chr7	6144500	6144700	67109	Zfp787
6785	chr5	38085900	38086100	200	117.167	2.12674	0.000734729	0.638436	chip2_peak_11212	chr5_38085900_38086100	chr5	38085900	38086100	71116	Stx18
7690	chr10	81116500	81116700	200	117.187	2.12712	0.000846137	0.649849	chip2_peak_12750	chr10_81116500_81116700	chr10	81116500	81116700	26396	Map2k2
153	chr17	5926700	5927100	400	117.195	2.12725	1.62e-06	0.0459937	chip2_peak_279	chr17_5926700_5927100	chr17	5926700	5927100	66616	Snx9
3242	chr17	71196600	71196800	200	117.197	2.1273	0.000303335	0.536187	chip2_peak_5305	chr17_71196600_71196800	chr17	71196600	71196800	64898	Lpin2
6400	chr12	98799200	98799400	200	117.202	2.12738	0.000685605	0.631413	chip2_peak_10557	chr12_98799200_98799400	chr12	98799200	98799400	319670	Eml5
1955	chr17	70746700	70747000	300	117.25	2.12825	0.000153165	0.437869	chip2_peak_3192	chr17_70746700_70747000	chr17	70746700	70747000	224997	Dlgap1
1475	chr16	52062000	52062300	300	117.261	2.12845	0.000100137	0.378312	chip2_peak_2394	chr16_52062000_52062300	chr16	52062000	52062300	208650	Cblb
5569	chr1	58403700	58403900	200	117.341	2.1299	0.000584022	0.615865	chip2_peak_9153	chr1_58403700_58403900	chr1	58403700	58403900	66882	Bzw1
3769	chr9	114639400	114639600	200	117.373	2.13048	0.000366481	0.563627	chip2_peak_6155	chr9_114639400_114639600	chr9	114639400	114639600	78893	Cnot10
1188	chr3	53000000	53000400	400	117.387	2.13075	7.37e-05	0.340376	chip2_peak_1926	chr3_53000000_53000400	chr3	53000000	53000400	67542	Cog6
7092	chr5	27660600	27660800	200	117.398	2.13095	0.000773746	0.643976	chip2_peak_11711	chr5_27660600_27660800	chr5	27660600	27660800	13483	Dpp6
4861	chr6	136130600	136130800	200	117.405	2.13106	0.000499407	0.599984	chip2_peak_7960	chr6_136130600_136130800	chr6	136130600	136130800	14812	Grin2b
5885	chr5	129512100	129512300	200	117.422	2.13137	0.000623714	0.623754	chip2_peak_9685	chr5_129512100_129512300	chr5	129512100	129512300	231769	Sfswap
4995	chr12	28804200	28804400	200	117.424	2.13141	0.000513187	0.600905	chip2_peak_8170	chr12_28804200_28804400	chr12	28804200	28804400	380752	Tssc1
8154	chr17	43606800	43607000	200	117.434	2.1316	0.000908559	0.65458	chip2_peak_13604	chr17_43606800_43607000	chr17	43606800	43607000	27226	Pla2g7
5277	chr6	144197700	144197900	200	117.456	2.13199	0.000545696	0.607416	chip2_peak_8639	chr6_144197700_144197900	chr6	144197700	144197900	20678	Sox5
4216	chr12	59183100	59183300	200	117.486	2.13253	0.000421479	0.580831	chip2_peak_6888	chr12_59183100_59183300	chr12	59183100	59183300	217615	Ctage5
1711	chr8	27120700	27120900	200	117.487	2.13255	0.000125769	0.410169	chip2_peak_2781	chr8_27120700_27120900	chr8	27120700	27120900	78560	Gpr124
6002	chr14	8229100	8229300	200	117.492	2.13264	0.000638959	0.625716	chip2_peak_9900	chr14_8229100_8229300	chr14	8229100	8229300	93732	Acox2
5816	chr8	72460300	72460500	200	117.501	2.13282	0.000612878	0.621921	chip2_peak_9537	chr8_72460300_72460500	chr8	72460300	72460500	27967	Cherp
5817	chr8	72460300	72460500	200	117.501	2.13282	0.000612878	0.621921	chip2_peak_9537	chr8_72460300_72460500	chr8	72460300	72460500	72254	1700030K09Rik
3640	chr11	53872000	53872200	200	117.507	2.13293	0.000350563	0.557174	chip2_peak_5952	chr11_53872000_53872200	chr11	53872000	53872200	20520	Slc22a5
6738	chr11	77501300	77501500	200	117.508	2.13294	0.000729487	0.638436	chip2_peak_11128	chr11_77501300_77501500	chr11	77501300	77501500	216963	Git1
347	chr8	108584500	108585000	500	117.537	2.13345	8.83e-06	0.12549	chip2_peak_591	chr8_108584500_108585000	chr8	108584500	108585000	100124495	Mir466g
348	chr8	108584500	108585000	500	117.537	2.13345	8.83e-06	0.12549	chip2_peak_591	chr8_108584500_108585000	chr8	108584500	108585000	109215	3010033K07Rik
7794	chr5	121772300	121772500	200	117.541	2.13353	0.000862944	0.651913	chip2_peak_12956	chr5_121772300_121772500	chr5	121772300	121772500	20239	Atxn2
7316	chr8	86642300	86642500	200	117.546	2.13363	0.000800581	0.645828	chip2_peak_12108	chr8_86642300_86642500	chr8	86642300	86642500	66887	Lonp2
2273	chr14	36921500	36921800	300	117.548	2.13366	0.000189001	0.468495	chip2_peak_3718	chr14_36921500_36921800	chr14	36921500	36921800	72972	Ccser2
6638	chr16	4375800	4376100	300	117.623	2.13502	0.000715155	0.635167	chip2_peak_10955	chr16_4375800_4376100	chr16	4375800	4376100	11515	Adcy9
2229	chr5	110788300	110788500	200	117.639	2.13531	0.000185409	0.465605	chip2_peak_3666	chr5_110788300_110788500	chr5	110788300	110788500	22241	Ulk1
7019	chr19	4839800	4840000	200	117.652	2.13554	0.000765263	0.64317	chip2_peak_11605	chr19_4839800_4840000	chr19	4839800	4840000	399599	Ccdc87
129	chr14	21847800	21848100	300	117.689	2.13623	1.06e-06	0.0357869	chip2_peak_236	chr14_21847800_21848100	chr14	21847800	21848100	69156	Comtd1
1498	chr2	166994100	166994300	200	117.69	2.13623	0.000102157	0.379697	chip2_peak_2437	chr2_166994100_166994300	chr2	166994100	166994300	20853	Stau1
2125	chr3	96527500	96527700	200	117.717	2.13672	0.000172252	0.453793	chip2_peak_3488	chr3_96527500_96527700	chr3	96527500	96527700	69585	Hfe2
5457	chr5	3598100	3598400	300	117.718	2.13675	0.000567216	0.611314	chip2_peak_8944	chr5_3598100_3598400	chr5	3598100	3598400	107689	Pet1
2001	chr9	78344600	78344800	200	117.756	2.13744	0.00015849	0.442059	chip2_peak_3282	chr9_78344600_78344800	chr9	78344600	78344800	14858	Gsta2
1997	chr2	119994800	119995200	400	117.756	2.13744	0.000158175	0.441979	chip2_peak_3272	chr2_119994800_119995200	chr2	119994800	119995200	26390	Mapkbp1
3236	chr7	25206600	25206800	200	117.766	2.13762	0.000302268	0.535649	chip2_peak_5291	chr7_25206600_25206800	chr7	25206600	25206800	67379	Dedd2
2115	chr11	103899300	103899500	200	117.768	2.13766	0.000171248	0.452724	chip2_peak_3474	chr11_103899300_103899500	chr11	103899300	103899500	18195	Nsf
4564	chr14	64439200	64439400	200	117.769	2.13767	0.00046215	0.590049	chip2_peak_7466	chr14_64439200_64439400	chr14	64439200	64439400	110265	Msra
4497	chr11	110207900	110208200	300	117.77	2.1377	0.000453693	0.588348	chip2_peak_7348	chr11_110207900_110208200	chr11	110207900	110208200	76184	Abca6
2658	chr15	90609900	90610100	200	117.783	2.13793	0.00023508	0.500335	chip2_peak_4360	chr15_90609900_90610100	chr15	90609900	90610100	66871	Cpne8
6959	chr12	85138700	85138900	200	117.802	2.13828	0.000754898	0.640661	chip2_peak_11503	chr12_85138700_85138900	chr12	85138700	85138900	238323	Rps6kl1
6074	chr8	90870200	90870400	200	117.817	2.13855	0.000644012	0.626297	chip2_peak_9974	chr8_90870200_90870400	chr8	90870200	90870400	109151	Chd9
345	chr19	42017400	42017700	300	117.824	2.13868	8.64e-06	0.123767	chip2_peak_585	chr19_42017400_42017700	chr19	42017400	42017700	226122	Ubtd1
6609	chr11	17169500	17169700	200	117.841	2.13899	0.000710872	0.634214	chip2_peak_10905	chr11_17169500_17169700	chr11	17169500	17169700	19058	Ppp3r1
2869	chr3	75530800	75531000	200	117.858	2.13929	0.000260275	0.515948	chip2_peak_4697	chr3_75530800_75531000	chr3	75530800	75531000	56426	Pdcd10
2530	chr7	76393000	76393200	200	117.886	2.13979	0.00021975	0.491396	chip2_peak_4144	chr7_76393000_76393200	chr7	76393000	76393200	244071	Agbl1
1148	chr12	70280400	70280700	300	117.893	2.13992	7.16e-05	0.336715	chip2_peak_1889	chr12_70280400_70280700	chr12	70280400	70280700	94090	Trim9
3497	chr15	99704300	99704600	300	117.914	2.14031	0.000336026	0.55333	chip2_peak_5719	chr15_99704300_99704600	chr15	99704300	99704600	83797	Smarcd1
5977	chr2	129101400	129101600	200	117.936	2.1407	0.000635743	0.625402	chip2_peak_9856	chr2_129101400_129101600	chr2	129101400	129101600	20017	Polr1b
6944	chr14	21035200	21035400	200	117.966	2.14124	0.000752573	0.640016	chip2_peak_11477	chr14_21035200_21035400	chr14	21035200	21035400	55946	Ap3m1
263	chr2	18265700	18266100	400	117.984	2.14158	5.36e-06	0.0935773	chip2_peak_464	chr2_18265700_18266100	chr2	18265700	18266100	13418	Dnajc1
2494	chr11	116400800	116401000	200	118.038	2.14256	0.000217104	0.490794	chip2_peak_4092	chr11_116400800_116401000	chr11	116400800	116401000	217340	Rnf157
172	chr8	119827600	119828100	500	118.062	2.14299	2.17e-06	0.0556478	chip2_peak_308	chr8_119827600_119828100	chr8	119827600	119828100	72042	Cotl1
6389	chr4	99945700	99945900	200	118.071	2.14316	0.000684083	0.631323	chip2_peak_10535	chr4_99945700_99945900	chr4	99945700	99945900	72157	Pgm2
3072	chr8	34941200	34941400	200	118.076	2.14324	0.000286461	0.530423	chip2_peak_5045	chr8_34941200_34941400	chr8	34941200	34941400	21951	Tnks
4071	chr11	75231500	75231800	300	118.078	2.14327	0.00040179	0.573254	chip2_peak_6638	chr11_75231500_75231800	chr11	75231500	75231800	237847	Rtn4rl1
7213	chr8	13964800	13965000	200	118.101	2.1437	0.000787939	0.643989	chip2_peak_11939	chr8_13964800_13965000	chr8	13964800	13965000	72148	Tdrp
7194	chr15	96998500	96998700	200	118.105	2.14378	0.000786034	0.643976	chip2_peak_11906	chr15_96998500_96998700	chr15	96998500	96998700	69354	Slc38a4
2794	chr8	119817700	119818000	300	118.141	2.14443	0.000249699	0.508444	chip2_peak_4560	chr8_119817700_119818000	chr8	119817700	119818000	72042	Cotl1
4906	chr4	46463400	46463600	200	118.164	2.14483	0.000504897	0.599984	chip2_peak_8042	chr4_46463400_46463600	chr4	46463400	46463600	67628	Anp32b
3066	chr3	95891600	95891800	200	118.191	2.14534	0.000285478	0.529829	chip2_peak_5030	chr3_95891600_95891800	chr3	95891600	95891800	229600	BC028528
2597	chr17	64675500	64675700	200	118.218	2.14581	0.00022644	0.493627	chip2_peak_4259	chr17_64675500_64675700	chr17	64675500	64675700	17158	Man2a1
1636	chr2	23071500	23071800	300	118.234	2.1461	0.000117234	0.399781	chip2_peak_2662	chr2_23071500_23071800	chr2	23071500	23071800	74159	Acbd5
7147	chr1	168288400	168288600	200	118.251	2.14641	0.000780967	0.643976	chip2_peak_11817	chr1_168288400_168288600	chr1	168288400	168288600	18514	Pbx1
1155	chr2	3490300	3490800	500	118.27	2.14676	7.19e-05	0.337004	chip2_peak_1899	chr2_3490300_3490800	chr2	3490300	3490800	50497	Hspa14
882	chr11	93967300	93967500	200	118.346	2.14814	4.66e-05	0.280747	chip2_peak_1449	chr11_93967300_93967500	chr11	93967300	93967500	18102	Nme1
8596	chr14	116349500	116349700	200	118.364	2.14847	0.000964024	0.657711	chip2_peak_14405	chr14_116349500_116349700	chr14	116349500	116349700	103978	Gpc5
4968	chr17	32319400	32319600	200	118.37	2.14858	0.000510278	0.600294	chip2_peak_8129	chr17_32319400_32319600	chr17	32319400	32319600	56399	Akap8
518	chr1	187226700	187227300	600	118.491	2.15077	2.04e-05	0.193628	chip2_peak_892	chr1_187226700_187227300	chr1	187226700	187227300	67769	Gpatch2
1807	chr17	56102900	56103500	600	118.501	2.15097	0.000137006	0.423282	chip2_peak_2940	chr17_56102900_56103500	chr17	56102900	56103500	57435	Plin4
412	chr15	78439600	78440000	400	118.569	2.15219	1.32e-05	0.159567	chip2_peak_690	chr15_78439600_78440000	chr15	78439600	78440000	71753	Tmprss6
213	chr19	11770600	11770900	300	118.57	2.15222	3.69e-06	0.0749026	chip2_peak_388	chr19_11770600_11770900	chr19	11770600	11770900	94063	Mrpl16
5480	chr17	63497200	63497400	200	118.581	2.1524	0.000568978	0.611314	chip2_peak_8979	chr17_63497200_63497400	chr17	63497200	63497400	50758	Fbxl17
8088	chr8	111949700	111949900	200	118.599	2.15273	0.000898472	0.65337	chip2_peak_13499	chr8_111949700_111949900	chr8	111949700	111949900	93739	Gabarapl2
30	chr10	83032500	83033100	600	118.604	2.15283	1.86e-08	0.00254	chip2_peak_50	chr10_83032500_83033100	chr10	83032500	83033100	58250	Chst11
6907	chr5	96160300	96160500	200	118.667	2.15398	0.000747929	0.639658	chip2_peak_11415	chr5_96160300_96160500	chr5	96160300	96160500	231464	Cnot6l
2205	chr15	42676400	42676700	300	118.705	2.15467	0.000182423	0.46348	chip2_peak_3625	chr15_42676400_42676700	chr15	42676400	42676700	11600	Angpt1
6819	chr10	89510600	89510800	200	118.707	2.15469	0.000737505	0.638515	chip2_peak_11262	chr10_89510600_89510800	chr10	89510600	89510800	20186	Nr1h4
2408	chr14	105124900	105125100	200	118.713	2.1548	0.000207434	0.484416	chip2_peak_3962	chr14_105124900_105125100	chr14	105124900	105125100	74213	Rbm26
5729	chr18	65582200	65582400	200	118.72	2.15493	0.000601805	0.618628	chip2_peak_9409	chr18_65582200_65582400	chr18	65582200	65582400	100526497	Mir466p
5730	chr18	65582200	65582400	200	118.72	2.15493	0.000601805	0.618628	chip2_peak_9409	chr18_65582200_65582400	chr18	65582200	65582400	102466254	Mir3473f
5731	chr18	65582200	65582400	200	118.72	2.15493	0.000601805	0.618628	chip2_peak_9409	chr18_65582200_65582400	chr18	65582200	65582400	328977	Zfp532
1723	chr10	87555700	87555900	200	118.726	2.15505	0.000126648	0.410322	chip2_peak_2803	chr10_87555700_87555900	chr10	87555700	87555900	18478	Pah
1433	chr19	31945800	31946300	500	118.74	2.15531	9.44e-05	0.367878	chip2_peak_2318	chr19_31945800_31946300	chr19	31945800	31946300	69865	A1cf
4787	chrX	18423700	18423900	200	118.747	2.15542	0.000488462	0.596736	chip2_peak_7819	chrX_18423700_18423900	chrX	18423700	18423900	75905	4930578C19Rik
8171	chr10	75078000	75078200	200	118.777	2.15596	0.00091128	0.65458	chip2_peak_13637	chr10_75078000_75078200	chr10	75078000	75078200	110279	Bcr
3147	chr5	30875800	30876100	300	118.779	2.15601	0.000293755	0.532758	chip2_peak_5164	chr5_30875800_30876100	chr5	30875800	30876100	68796	Tmem214
195	chr6	112635800	112636200	400	118.785	2.15611	2.9e-06	0.065544	chip2_peak_353	chr6_112635800_112636200	chr6	112635800	112636200	58186	Rad18
5112	chr2	113305500	113305700	200	118.801	2.1564	0.000528691	0.604823	chip2_peak_8371	chr2_113305500_113305700	chr2	113305500	113305700	100316776	Mir1954
5508	chr2	26587600	26587800	200	118.812	2.15661	0.0005737	0.61225	chip2_peak_9041	chr2_26587600_26587800	chr2	26587600	26587800	353156	Egfl7
5961	chr10	76883800	76884000	200	118.852	2.15733	0.000633151	0.624975	chip2_peak_9821	chr10_76883800_76884000	chr10	76883800	76884000	59093	Pcbp3
3521	chr17	47922700	47923000	300	118.857	2.15742	0.000337779	0.553803	chip2_peak_5750	chr17_47922700_47923000	chr17	47922700	47923000	74123	Foxp4
7279	chr15	100076800	100077000	200	118.897	2.15815	0.000795629	0.645141	chip2_peak_12047	chr15_100076800_100077000	chr15	100076800	100077000	239667	Dip2b
1623	chr7	135028500	135028700	200	118.903	2.15826	0.00011582	0.397691	chip2_peak_2646	chr7_135028500_135028700	chr7	135028500	135028700	330662	Dock1
381	chr5	103903800	103904100	300	118.928	2.15871	1.09e-05	0.143165	chip2_peak_638	chr5_103903800_103904100	chr5	103903800	103904100	246293	Klhl8
5107	chr14	39192000	39192300	300	118.936	2.15885	0.000528024	0.604416	chip2_peak_8365	chr14_39192000_39192300	chr14	39192000	39192300	18183	Nrg3
3152	chr8	22636000	22636200	200	118.942	2.15896	0.000294161	0.532796	chip2_peak_5170	chr8_22636000_22636200	chr8	22636000	22636200	18970	Polb
3153	chr8	22636000	22636200	200	118.942	2.15896	0.000294161	0.532796	chip2_peak_5170	chr8_22636000_22636200	chr8	22636000	22636200	68074	A930013F10Rik
6688	chr13	45708200	45708400	200	118.975	2.15956	0.000721275	0.636382	chip2_peak_11032	chr13_45708200_45708400	chr13	45708200	45708400	20238	Atxn1
5016	chr7	132729600	132729800	200	118.982	2.15969	0.000517532	0.602542	chip2_peak_8215	chr7_132729600_132729800	chr7	132729600	132729800	77938	Fam53b
1469	chr5	143678500	143678800	300	119.02	2.16038	9.93e-05	0.377502	chip2_peak_2376	chr5_143678500_143678800	chr5	143678500	143678800	19159	Cyth3
1034	chr6	82997700	82998000	300	119.024	2.16046	6.25e-05	0.322476	chip2_peak_1707	chr6_82997700_82998000	chr6	82997700	82998000	110958	M1ap
6102	chr17	71233800	71234000	200	119.028	2.16052	0.000648082	0.626538	chip2_peak_10034	chr17_71233800_71234000	chr17	71233800	71234000	64898	Lpin2
7622	chr9	9019800	9020000	200	119.031	2.16058	0.000835741	0.648364	chip2_peak_12624	chr9_9019800_9020000	chr9	9019800	9020000	71544	Arhgap42
15	chr9	119151800	119152900	1100	119.046	2.16086	1.37e-09	0.000365083	chip2_peak_23	chr9_119151800_119152900	chr9	119151800	119152900	235674	Acaa1b
8268	chr11	100823900	100824100	200	119.057	2.16105	0.00092216	0.65458	chip2_peak_13806	chr11_100823900_100824100	chr11	100823900	100824100	20851	Stat5b
2936	chr13	20511400	20511600	200	119.084	2.16155	0.00026926	0.522099	chip2_peak_4812	chr13_20511400_20511600	chr13	20511400	20511600	140580	Elmo1
6961	chr9	123842200	123842400	200	119.104	2.1619	0.000755196	0.640846	chip2_peak_11505	chr9_123842200_123842400	chr9	123842200	123842400	17281	Fyco1
1927	chr11	115616400	115616600	200	119.12	2.16219	0.000150557	0.437113	chip2_peak_3138	chr11_115616400_115616600	chr11	115616400	115616600	67283	Slc25a19
3253	chr10	121370500	121370700	200	119.14	2.16256	0.000304647	0.536525	chip2_peak_5327	chr10_121370500_121370700	chr10	121370500	121370700	75612	Gns
1123	chr1	38626800	38627200	400	119.147	2.16268	6.96e-05	0.333339	chip2_peak_1850	chr1_38626800_38627200	chr1	38626800	38627200	16764	Aff3
8125	chr14	66108500	66108700	200	119.162	2.16295	0.00090354	0.654203	chip2_peak_13560	chr14_66108500_66108700	chr14	66108500	66108700	13850	Ephx2
984	chr1	128245100	128245300	200	119.245	2.16446	5.64e-05	0.305119	chip2_peak_1629	chr1_128245100_128245300	chr1	128245100	128245300	67812	Ubxn4
2369	chr12	90202600	90203000	400	119.275	2.165	0.000201953	0.480112	chip2_peak_3890	chr12_90202600_90203000	chr12	90202600	90203000	18191	Nrxn3
139	chr8	122625700	122626600	900	119.278	2.16506	1.27e-06	0.0394857	chip2_peak_258	chr8_122625700_122626600	chr8	122625700	122626600	12398	Cbfa2t3
8077	chr10	7793600	7793800	200	119.281	2.16512	0.000896193	0.652833	chip2_peak_13480	chr10_7793600_7793800	chr10	7793600	7793800	67418	Ppil4
3483	chr1	138590800	138591000	200	119.282	2.16514	0.00033339	0.551899	chip2_peak_5691	chr1_138590800_138591000	chr1	138590800	138591000	59125	Nek7
8253	chr1	184819000	184819200	200	119.284	2.16517	0.000920923	0.65458	chip2_peak_13780	chr1_184819000_184819200	chr1	184819000	184819200	107980	Ifaprc2
2260	chr11	120477300	120477600	300	119.29	2.16528	0.000187526	0.46713	chip2_peak_3698	chr11_120477300_120477600	chr11	120477300	120477600	15239	Hgs
2160	chr6	38792600	38792800	200	119.324	2.16589	0.000176703	0.457777	chip2_peak_3550	chr6_38792600_38792800	chr6	38792600	38792800	15258	Hipk2
5869	chr5	124205000	124205200	200	119.34	2.16619	0.000622244	0.623754	chip2_peak_9662	chr5_124205000_124205200	chr5	124205000	124205200	19679	Pitpnm2
5173	chr13	77178200	77178400	200	119.381	2.16693	0.000535243	0.605729	chip2_peak_8470	chr13_77178200_77178400	chr13	77178200	77178400	72371	2210408I21Rik
3959	chr9	46298100	46298400	300	119.396	2.1672	0.000388363	0.569737	chip2_peak_6447	chr9_46298100_46298400	chr9	46298100	46298400	215051	Bud13
4969	chr12	110576100	110576300	200	119.397	2.16723	0.000510899	0.600571	chip2_peak_8133	chr12_110576100_110576300	chr12	110576100	110576300	26931	Ppp2r5c
1702	chr5	120440900	120441200	300	119.397	2.16723	0.000124473	0.40913	chip2_peak_2761	chr5_120440900_120441200	chr5	120440900	120441200	16873	Lhx5
233	chr19	40362000	40362400	400	119.406	2.16739	4.12e-06	0.0783948	chip2_peak_417	chr19_40362000_40362400	chr19	40362000	40362400	20411	Sorbs1
3865	chr5	121683100	121683400	300	119.426	2.16775	0.000377965	0.567617	chip2_peak_6299	chr5_121683100_121683400	chr5	121683100	121683400	72399	Brap
3811	chr2	130697300	130697500	200	119.437	2.16794	0.000372185	0.566295	chip2_peak_6220	chr2_130697300_130697500	chr2	130697300	130697500	269356	Slc4a11
5831	chr13	5863300	5863500	200	119.469	2.16853	0.000615555	0.622234	chip2_peak_9577	chr13_5863300_5863500	chr13	5863300	5863500	23849	Klf6
26	chr16	72663000	72663400	400	119.475	2.16863	1.15e-08	0.00186566	chip2_peak_42	chr16_72663000_72663400	chr16	72663000	72663400	19876	Robo1
6441	chr13	63155000	63155300	300	119.481	2.16874	0.000690577	0.632282	chip2_peak_10619	chr13_63155000_63155300	chr13	63155000	63155300	72061	2010111I01Rik
5396	chr8	83921500	83921700	200	119.499	2.16907	0.000560689	0.610954	chip2_peak_8842	chr8_83921500_83921700	chr8	83921500	83921700	330814	Lphn1
804	chr4	117867900	117868100	200	119.547	2.16994	4.12e-05	0.267732	chip2_peak_1335	chr4_117867900_117868100	chr4	117867900	117868100	14664	Slc6a9
4076	chr15	102126700	102127200	500	119.549	2.16998	0.000402141	0.573254	chip2_peak_6646	chr15_102126700_102127200	chr15	102126700	102127200	223918	Spryd3
262	chr13	80891700	80892000	300	119.55	2.17	5.34e-06	0.0933826	chip2_peak_463	chr13_80891700_80892000	chr13	80891700	80892000	105171	Arrdc3
859	chr6	97871700	97872000	300	119.577	2.17049	4.52e-05	0.27835	chip2_peak_1420	chr6_97871700_97872000	chr6	97871700	97872000	667838	Naip3
8173	chr2	26342700	26342900	200	119.589	2.17072	0.000911475	0.65458	chip2_peak_13641	chr2_26342700_26342900	chr2	26342700	26342900	67839	Gpsm1
5618	chr2	157030700	157030900	200	119.627	2.1714	0.000589733	0.61714	chip2_peak_9230	chr2_157030700_157030900	chr2	157030700	157030900	320706	Soga1
4475	chr10	60289900	60290100	200	119.641	2.17165	0.000451025	0.587806	chip2_peak_7307	chr10_60289900_60290100	chr10	60289900	60290100	19156	Psap
744	chr8	94393600	94393800	200	119.659	2.17198	3.64e-05	0.253116	chip2_peak_1245	chr8_94393600_94393800	chr8	94393600	94393800	64209	Herpud1
8605	chr14	11151500	11151700	200	119.7	2.17271	0.000965421	0.657711	chip2_peak_14424	chr14_11151500_11151700	chr14	11151500	11151700	14198	Fhit
6093	chr7	47052600	47052800	200	119.702	2.17276	0.00064728	0.626538	chip2_peak_10019	chr7_47052600_47052800	chr7	47052600	47052800	67893	Tmem86a
5034	chr18	75067300	75067500	200	119.718	2.17304	0.000519737	0.602542	chip2_peak_8243	chr18_75067300_75067500	chr18	75067300	75067500	69190	Dym
3428	chr11	60790500	60790800	300	119.723	2.17315	0.000327157	0.549917	chip2_peak_5602	chr11_60790500_60790800	chr11	60790500	60790800	20425	Shmt1
4616	chr15	80989700	80989900	200	119.739	2.17343	0.000468873	0.592378	chip2_peak_7554	chr15_80989700_80989900	chr15	80989700	80989900	105835	Sgsm3
2811	chr6	116349000	116349400	400	119.758	2.17378	0.000252882	0.511092	chip2_peak_4596	chr6_116349000_116349400	chr6	116349000	116349400	71779	2023-03-08
7051	chr2	125781800	125782000	200	119.76	2.17381	0.000769155	0.643615	chip2_peak_11653	chr2_125781800_125782000	chr2	125781800	125782000	70354	Secisbp2l
1331	chr16	43485600	43485800	200	119.777	2.17413	8.53e-05	0.354491	chip2_peak_2154	chr16_43485600_43485800	chr16	43485600	43485800	56490	Zbtb20
850	chr6	141659800	141660100	300	119.785	2.17426	4.47e-05	0.277318	chip2_peak_1406	chr6_141659800_141660100	chr6	141659800	141660100	28253	Slco1b2
4941	chr13	96060300	96060500	200	119.829	2.17506	0.000508127	0.600207	chip2_peak_8090	chr13_96060300_96060500	chr13	96060300	96060500	75209	Sv2c
6105	chr7	96904300	96904500	200	119.834	2.17516	0.000648246	0.626538	chip2_peak_10039	chr7_96904300_96904500	chr7	96904300	96904500	23966	Tenm4
7588	chr8	77012200	77012400	200	119.843	2.17532	0.000832344	0.648347	chip2_peak_12571	chr8_77012200_77012400	chr8	77012200	77012400	110784	Nr3c2
2958	chr16	96391100	96391400	300	119.847	2.1754	0.000272041	0.52388	chip2_peak_4849	chr16_96391100_96391400	chr16	96391100	96391400	72058	Igsf5
1445	chr11	103406500	103407000	500	119.862	2.17567	9.66e-05	0.372101	chip2_peak_2341	chr11_103406500_103407000	chr11	103406500	103407000	353047	Plekhm1
6077	chr3	67084200	67084500	300	119.863	2.17568	0.000644324	0.626297	chip2_peak_9982	chr3_67084200_67084500	chr3	67084200	67084500	66880	Rsrc1
6129	chr4	109001300	109001500	200	119.918	2.17668	0.000651113	0.627057	chip2_peak_10079	chr4_109001300_109001500	chr4	109001300	109001500	230598	Nrd1
4981	chr10	40790600	40790800	200	119.922	2.17675	0.000512107	0.600571	chip2_peak_8154	chr10_40790600_40790800	chr10	40790600	40790800	327747	Mettl24
2048	chr7	65863800	65864300	500	119.923	2.17676	0.000163405	0.4452	chip2_peak_3364	chr7_65863800_65864300	chr7	65863800	65864300	18553	Pcsk6
7691	chr3	34072900	34073100	200	119.941	2.17709	0.000846281	0.649849	chip2_peak_12753	chr3_34072900_34073100	chr3	34072900	34073100	67713	Dnajc19
1641	chr7	101927900	101928300	400	119.966	2.17756	0.000117685	0.400414	chip2_peak_2669	chr7_101927900_101928300	chr7	101927900	101928300	69358	Lrrc51
1370	chr5	3598700	3599000	300	119.993	2.17804	9.02e-05	0.362885	chip2_peak_2231	chr5_3598700_3599000	chr5	3598700	3599000	107689	Pet1
2295	chr14	16483900	16484500	600	119.997	2.17812	0.00019244	0.472291	chip2_peak_3759	chr14_16483900_16484500	chr14	16483900	16484500	218772	Rarb
7444	chr13	53356800	53357000	200	120.002	2.17821	0.000815792	0.646731	chip2_peak_12339	chr13_53356800_53357000	chr13	53356800	53357000	268656	Sptlc1
5786	chr5	25253300	25253500	200	120.017	2.17847	0.000609056	0.620932	chip2_peak_9494	chr5_25253300_25253500	chr5	25253300	25253500	231050	Galnt11
378	chr7	127803600	127803800	200	120.019	2.17851	1.08e-05	0.142241	chip2_peak_635	chr7_127803600_127803800	chr7	127803600	127803800	101502	Hsd3b7
6388	chr4	81316400	81316600	200	120.033	2.17877	0.000683944	0.631323	chip2_peak_10533	chr4_81316400_81316600	chr4	81316400	81316600	17475	Mpdz
6254	chr1	52040500	52040700	200	120.036	2.17882	0.00066669	0.628727	chip2_peak_10296	chr1_52040500_52040700	chr1	52040500	52040700	20849	Stat4
413	chr19	3365800	3366100	300	120.061	2.17927	1.32e-05	0.159643	chip2_peak_692	chr19_3365800_3366100	chr19	3365800	3366100	12894	Cpt1a
235	chr19	3356800	3357300	500	120.076	2.17954	4.18e-06	0.0791097	chip2_peak_420	chr19_3356800_3357300	chr19	3356800	3357300	12894	Cpt1a
637	chr15	89428900	89429100	200	120.083	2.17968	2.84e-05	0.225714	chip2_peak_1081	chr15_89428900_89429100	chr15	89428900	89429100	100134861	ChkbCpt1b
638	chr15	89428900	89429100	200	120.083	2.17968	2.84e-05	0.225714	chip2_peak_1081	chr15_89428900_89429100	chr15	89428900	89429100	12651	Chkb
5283	chr12	104036900	104037100	200	120.104	2.18005	0.000546311	0.607741	chip2_peak_8646	chr12_104036900_104037100	chr12	104036900	104037100	68054	Serpina12
815	chr7	25645900	25646200	300	120.119	2.18033	4.15e-05	0.268028	chip2_peak_1347	chr7_25645900_25646200	chr7	25645900	25646200	12039	Bckdha
1131	chr8	104584900	104585200	300	120.13	2.18054	7.04e-05	0.33556	chip2_peak_1860	chr8_104584900_104585200	chr8	104584900	104585200	723945	Mir297-2
8463	chr8	84744500	84744700	200	120.133	2.18059	0.000946959	0.656668	chip2_peak_14165	chr8_84744500_84744700	chr8	84744500	84744700	18032	Nfix
6006	chr9	99523900	99524200	300	120.152	2.18093	0.000639656	0.625985	chip2_peak_9906	chr9_99523900_99524200	chr9	99523900	99524200	74125	Armc8
2268	chr6	88750200	88750500	300	120.157	2.18102	0.000188722	0.468312	chip2_peak_3713	chr6_88750200_88750500	chr6	88750200	88750500	23945	Mgll
1141	chr17	24584500	24584800	300	120.182	2.18148	7.11e-05	0.335892	chip2_peak_1876	chr17_24584500_24584800	chr17	24584500	24584800	18763	Pkd1
2037	chr2	102450300	102450600	300	120.199	2.18179	0.000162117	0.443235	chip2_peak_3347	chr2_102450300_102450600	chr2	102450300	102450600	14221	Fjx1
1841	chr14	64764300	64764500	200	120.241	2.18255	0.000139685	0.425478	chip2_peak_2990	chr14_64764300_64764500	chr14	64764300	64764500	16554	Kif13b
7451	chr5	24439800	24440000	200	120.242	2.18256	0.000817113	0.64695	chip2_peak_12355	chr5_24439800_24440000	chr5	24439800	24440000	20535	Slc4a2
424	chr4	118179100	118179300	200	120.291	2.18344	1.38e-05	0.162334	chip2_peak_711	chr4_118179100_118179300	chr4	118179100	118179300	230674	Kdm4a
3722	chr16	11638800	11639100	300	120.294	2.1835	0.000361259	0.561464	chip2_peak_6089	chr16_11638800_11639100	chr16	11638800	11639100	74478	Snx29
1725	chr3	97633100	97633300	200	120.309	2.18378	0.000126924	0.41071	chip2_peak_2806	chr3_97633100_97633300	chr3	97633100	97633300	14263	Fmo5
7742	chr6	124686200	124686400	200	120.32	2.18398	0.000854212	0.650894	chip2_peak_12864	chr6_124686200_124686400	chr6	124686200	124686400	14792	Lpcat3
7	chr7	132727900	132728400	500	120.324	2.18404	1.18e-10	5.35e-05	chip2_peak_15	chr7_132727900_132728400	chr7	132727900	132728400	77938	Fam53b
5314	chr3	87908600	87908800	200	120.337	2.18428	0.000550218	0.609105	chip2_peak_8688	chr3_87908600_87908800	chr3	87908600	87908800	15191	Hdgf
53	chr17	86293100	86293300	200	120.353	2.18457	1e-07	0.00790785	chip2_peak_93	chr17_86293100_86293300	chr17	86293100	86293300	18754	Prkce
2310	chr5	35839600	35839900	300	120.387	2.18519	0.000194782	0.474536	chip2_peak_3790	chr5_35839600_35839900	chr5	35839600	35839900	231148	Ablim2
763	chr17	11580500	11580800	300	120.392	2.18528	3.76e-05	0.25647	chip2_peak_1273	chr17_11580500_11580800	chr17	11580500	11580800	50873	Park2
8719	chr11	109970800	109971000	200	120.442	2.1862	0.000979532	0.658047	chip2_peak_14632	chr11_109970800_109971000	chr11	109970800	109971000	27404	Abca8b
4687	chr7	122534000	122534200	200	120.446	2.18626	0.000475812	0.592903	chip2_peak_7664	chr7_122534000_122534200	chr7	122534000	122534200	18751	Prkcb
77	chr16	90804500	90804900	400	120.457	2.18646	2.59e-07	0.0146251	chip2_peak_135	chr16_90804500_90804900	chr16	90804500	90804900	207932	Urb1
7254	chr13	92469800	92470000	200	120.483	2.18693	0.000792449	0.644659	chip2_peak_12004	chr13_92469800_92470000	chr13	92469800	92470000	73942	Fam151b
6288	chr2	156204600	156204800	200	120.483	2.18693	0.000669895	0.628727	chip2_peak_10353	chr2_156204600_156204800	chr2	156204600	156204800	228829	Phf20
5654	chr1	89516300	89516500	200	120.501	2.18726	0.000593166	0.617171	chip2_peak_9288	chr1_89516300_89516500	chr1	89516300	89516500	347722	Agap1
6984	chr3	146770900	146771100	200	120.51	2.18743	0.000758623	0.641794	chip2_peak_11540	chr3_146770900_146771100	chr3	146770900	146771100	18749	Prkacb
6968	chr4	145276300	145276500	200	120.556	2.18826	0.00075631	0.641155	chip2_peak_11515	chr4_145276300_145276500	chr4	145276300	145276500	21941	Tnfrsf8
380	chr17	10664400	10664700	300	120.58	2.1887	1.09e-05	0.142796	chip2_peak_637	chr17_10664400_10664700	chr17	10664400	10664700	69310	Pacrg
282	chr12	73316300	73316900	600	120.586	2.18881	6.41e-06	0.106247	chip2_peak_490	chr12_73316300_73316900	chr12	73316300	73316900	625098	Slc38a6
885	chr1	55505800	55506300	500	120.587	2.18881	4.66e-05	0.280747	chip2_peak_1453	chr1_55505800_55506300	chr1	55505800	55506300	227120	Plcl1
6216	chr2	24405400	24405600	200	120.593	2.18893	0.000662292	0.628307	chip2_peak_10231	chr2_24405400_24405600	chr2	24405400	24405600	215632	Psd4
2871	chr8	107480500	107480900	400	120.608	2.1892	0.000260312	0.515948	chip2_peak_4699	chr8_107480500_107480900	chr8	107480500	107480900	66894	Wwp2
6360	chr4	120801500	120801700	200	120.617	2.18936	0.00068044	0.630863	chip2_peak_10480	chr4_120801500_120801700	chr4	120801500	120801700	18046	Nfyc
8622	chr17	34264500	34264700	200	120.63	2.1896	0.00096789	0.657711	chip2_peak_14455	chr17_34264500_34264700	chr17	34264500	34264700	14961	H2-Ab1
95	chr13	9687200	9687800	600	120.636	2.18971	5.11e-07	0.0226893	chip2_peak_171	chr13_9687200_9687800	chr13	9687200	9687800	66505	Zmynd11
2274	chr5	148542300	148542500	200	120.733	2.19148	0.00018909	0.468495	chip2_peak_3719	chr5_148542300_148542500	chr5	148542300	148542500	24109	Ubl3
4936	chr14	34226900	34227100	200	120.738	2.19157	0.000507501	0.600207	chip2_peak_8082	chr14_34226900_34227100	chr14	34226900	34227100	319508	Syt15
7214	chr8	93191100	93191300	200	120.746	2.19171	0.000788118	0.643989	chip2_peak_11940	chr8_93191100_93191300	chr8	93191100	93191300	104158	Ces1d
4487	chr8	75039800	75040000	200	120.755	2.19186	0.000452383	0.587882	chip2_peak_7330	chr8_75039800_75040000	chr8	75039800	75040000	21968	Tom1
6249	chr10	78243600	78243800	200	120.777	2.19227	0.000666106	0.628727	chip2_peak_10285	chr10_78243600_78243800	chr10	78243600	78243800	216131	Trappc10
914	chr7	143588200	143588800	600	120.781	2.19234	4.95e-05	0.289741	chip2_peak_1501	chr7_143588200_143588800	chr7	143588200	143588800	27267	Cars
1881	chr4	154012500	154012800	300	120.807	2.19281	0.00014372	0.429234	chip2_peak_3057	chr4_154012500_154012800	chr4	154012500	154012800	72946	Lrrc47
1882	chr11	50417100	50417600	500	120.811	2.19288	0.000143851	0.42941	chip2_peak_3058	chr11_50417100_50417600	chr11	50417100	50417600	216724	Rufy1
4881	chr3	86634800	86635000	200	120.82	2.19306	0.000502544	0.599984	chip2_peak_7998	chr3_86634800_86635000	chr3	86634800	86635000	80877	Lrba
1293	chr3	14871100	14871400	300	120.835	2.19333	8.19e-05	0.348548	chip2_peak_2094	chr3_14871100_14871400	chr3	14871100	14871400	12350	Car3
7339	chr3	62392100	62392300	200	120.852	2.19364	0.000803741	0.646243	chip2_peak_12141	chr3_62392100_62392300	chr3	62392100	62392300	622434	Arhgef26
408	chrX	100729800	100730200	400	120.87	2.19395	1.29e-05	0.158069	chip2_peak_681	chrX_100729800_100730200	chrX	100729800	100730200	71584	Gdpd2
1496	chr14	27402200	27402500	300	120.883	2.19419	0.00010213	0.379697	chip2_peak_2435	chr14_27402200_27402500	chr14	27402200	27402500	71704	Arhgef3
2113	chr4	128777200	128777400	200	120.894	2.19439	0.000170733	0.451799	chip2_peak_3470	chr4_128777200_128777400	chr4	128777200	128777400	230761	Zfp362
2734	chr2	166957200	166957400	200	120.897	2.19445	0.000244274	0.505427	chip2_peak_4479	chr2_166957200_166957400	chr2	166957200	166957400	20853	Stau1
635	chr9	71132700	71133000	300	120.9	2.19451	2.83e-05	0.225604	chip2_peak_1079	chr9_71132700_71133000	chr9	71132700	71133000	64008	Aqp9
7205	chr9	21288900	21289100	200	120.905	2.19459	0.00078698	0.643976	chip2_peak_11925	chr9_21288900_21289100	chr9	21288900	21289100	12581	Cdkn2d
1585	chr14	55783200	55783500	300	120.953	2.19547	0.000111744	0.390869	chip2_peak_2592	chr14_55783200_55783500	chr14	55783200	55783500	104110	Adcy4
735	chr4	141329000	141329300	300	120.953	2.19547	3.55e-05	0.249396	chip2_peak_1228	chr4_141329000_141329300	chr4	141329000	141329300	13836	Epha2
841	chr2	25255800	25256100	300	120.955	2.1955	4.39e-05	0.275464	chip2_peak_1390	chr2_25255800_25256100	chr2	25255800	25256100	227615	Tmem203
6760	chr10	103028400	103028600	200	120.955	2.1955	0.000731856	0.638436	chip2_peak_11166	chr10_103028400_103028600	chr10	103028400	103028600	216285	Alx1
3842	chr17	14960100	14960300	200	120.97	2.19578	0.000375155	0.566396	chip2_peak_6268	chr17_14960100_14960300	chr17	14960100	14960300	72057	Phf10
420	chr2	25707000	25707300	300	120.991	2.19615	1.37e-05	0.161534	chip2_peak_704	chr2_25707000_25707300	chr2	25707000	25707300	107771	Bmyc
5268	chr4	82497100	82497300	200	120.991	2.19616	0.000545053	0.60739	chip2_peak_8626	chr4_82497100_82497300	chr4	82497100	82497300	18028	Nfib
8826	chr16	8524800	8525000	200	120.997	2.19627	0.000995349	0.659507	chip2_peak_14850	chr16_8524800_8525000	chr16	8524800	8525000	268860	Abat
3628	chr8	13961600	13961800	200	121.013	2.19656	0.000349091	0.55659	chip2_peak_5929	chr8_13961600_13961800	chr8	13961600	13961800	72148	Tdrp
468	chr10	89492800	89493300	500	121.017	2.19663	1.7e-05	0.178694	chip2_peak_800	chr10_89492800_89493300	chr10	89492800	89493300	20186	Nr1h4
3853	chr19	22171400	22171600	200	121.019	2.19667	0.000375952	0.566683	chip2_peak_6283	chr19_22171400_22171600	chr19	22171400	22171600	226025	Trpm3
3363	chr15	102501100	102501300	200	121.021	2.1967	0.000318275	0.544585	chip2_peak_5492	chr15_102501100_102501300	chr15	102501100	102501300	26404	Map3k12
552	chr18	38258000	38258200	200	121.04	2.19705	2.3e-05	0.205383	chip2_peak_953	chr18_38258000_38258200	chr18	38258000	38258200	66839	0610009O20Rik
6467	chr9	21921400	21921600	200	121.058	2.19737	0.000693431	0.632282	chip2_peak_10666	chr9_21921400_21921600	chr9	21921400	21921600	235043	Tmem205
5272	chr7	45464900	45465100	200	121.068	2.19755	0.000545386	0.60739	chip2_peak_8632	chr7_45464900_45465100	chr7	45464900	45465100	18095	Nkx3-1
5335	chr14	75377400	75377600	200	121.078	2.19773	0.000552716	0.609623	chip2_peak_8725	chr14_75377400_75377600	chr14	75377400	75377600	100124475	Mir466f-3
2002	chr13	23685000	23685400	400	121.132	2.19872	0.000158739	0.442178	chip2_peak_3285	chr13_23685000_23685400	chr13	23685000	23685400	68024	Hist1h2bc
1133	chr17	84652900	84653300	400	121.151	2.19905	7.06e-05	0.335807	chip2_peak_1864	chr17_84652900_84653300	chr17	84652900	84653300	213575	Dync2li1
3715	chr8	85079800	85080000	200	121.161	2.19923	0.000360378	0.561037	chip2_peak_6077	chr8_85079800_85080000	chr8	85079800	85080000	67836	Wdr83
5955	chr3	146612500	146612700	200	121.171	2.19943	0.00063254	0.624864	chip2_peak_9811	chr3_146612500_146612700	chr3	146612500	146612700	22262	Uox
5956	chr3	146612500	146612700	200	121.171	2.19943	0.00063254	0.624864	chip2_peak_9811	chr3_146612500_146612700	chr3	146612500	146612700	56629	Dnase2b
1385	chr17	71245700	71245900	200	121.188	2.19973	9.14e-05	0.36552	chip2_peak_2250	chr17_71245700_71245900	chr17	71245700	71245900	64898	Lpin2
1200	chr5	31949500	31949800	300	121.206	2.20006	7.47e-05	0.340649	chip2_peak_1945	chr5_31949500_31949800	chr5	31949500	31949800	107976	Bre
108	chr5	110733300	110733600	300	121.208	2.2001	6.76e-07	0.0274368	chip2_peak_191	chr5_110733300_110733600	chr5	110733300	110733600	75560	Ep400
2614	chr4	129220400	129220600	200	121.236	2.2006	0.000230189	0.497722	chip2_peak_4290	chr4_129220400_129220600	chr4	129220400	129220600	97130	C77080
7645	chr2	156447500	156447700	200	121.238	2.20064	0.000839325	0.648953	chip2_peak_12667	chr2_156447500_156447700	chr2	156447500	156447700	13821	Epb4.1l1
2920	chr9	118886000	118886200	200	121.25	2.20086	0.000266836	0.520267	chip2_peak_4789	chr9_118886000_118886200	chr9	118886000	118886200	104099	Itga9
4248	chr15	66578300	66578500	200	121.265	2.20113	0.000425833	0.581881	chip2_peak_6942	chr15_66578300_66578500	chr15	66578300	66578500	239510	Phf20l1
4961	chr1	179476600	179476800	200	121.268	2.20119	0.000509592	0.600294	chip2_peak_8116	chr1_179476600_179476800	chr1	179476600	179476800	69726	Smyd3
2175	chr15	12566900	12567200	300	121.299	2.20174	0.000178415	0.459203	chip2_peak_3572	chr15_12566900_12567200	chr15	12566900	12567200	68070	Pdzd2
1091	chr14	66098400	66098800	400	121.318	2.2021	6.76e-05	0.332202	chip2_peak_1799	chr14_66098400_66098800	chr14	66098400	66098800	13850	Ephx2
311	chr11	62315100	62315500	400	121.342	2.20254	7.47e-06	0.115516	chip2_peak_534	chr11_62315100_62315500	chr11	62315100	62315500	72795	Ttc19
7760	chr13	24128700	24128900	200	121.363	2.20291	0.000857718	0.651657	chip2_peak_12903	chr13_24128700_24128900	chr13	24128700	24128900	68732	Lrrc16a
1214	chr11	95337400	95337600	200	121.407	2.20371	7.58e-05	0.342122	chip2_peak_1972	chr11_95337400_95337600	chr11	95337400	95337600	215512	Fam117a
4031	chr3	106544400	106544600	200	121.409	2.20374	0.0003973	0.572288	chip2_peak_6571	chr3_106544400_106544600	chr3	106544400	106544600	99712	Cept1
4108	chr10	76455300	76455700	400	121.453	2.20455	0.000406672	0.574901	chip2_peak_6705	chr10_76455300_76455700	chr10	76455300	76455700	76964	2610028H24Rik
4626	chr2	154598400	154598600	200	121.479	2.20502	0.000470046	0.592894	chip2_peak_7566	chr2_154598400_154598600	chr2	154598400	154598600	59038	Pxmp4
8501	chr16	38613800	38614000	200	121.509	2.20556	0.000952481	0.657237	chip2_peak_14241	chr16_38613800_38614000	chr16	38613800	38614000	12549	Arhgap31
5476	chr11	101576100	101576300	200	121.545	2.20622	0.000568818	0.611314	chip2_peak_8973	chr11_101576100_101576300	chr11	101576100	101576300	17966	Nbr1
1326	chr5	136135500	136135700	200	121.549	2.20628	8.52e-05	0.354491	chip2_peak_2147	chr5_136135500_136135700	chr5	136135500	136135700	71735	Lrwd1
3780	chr5	64325900	64326300	400	121.554	2.20638	0.000367541	0.564101	chip2_peak_6171	chr5_64325900_64326300	chr5	64325900	64326300	57915	Tbc1d1
4427	chr6	55123100	55123300	200	121.556	2.20641	0.000446672	0.587543	chip2_peak_7230	chr6_55123100_55123300	chr6	55123100	55123300	12922	Crhr2
8504	chr11	95033700	95033900	200	121.564	2.20656	0.000953014	0.657312	chip2_peak_14247	chr11_95033700_95033900	chr11	95033700	95033900	18604	Pdk2
3574	chr5	146431900	146432100	200	121.583	2.2069	0.000344699	0.556432	chip2_peak_5848	chr5_146431900_146432100	chr5	146431900	146432100	245880	Wasf3
6581	chr6	31528000	31528300	300	121.585	2.20693	0.000707254	0.633695	chip2_peak_10859	chr6_31528000_31528300	chr6	31528000	31528300	27205	Podxl
5673	chr3	84479800	84480000	200	121.602	2.20724	0.000595204	0.617577	chip2_peak_9314	chr3_84479800_84480000	chr3	84479800	84480000	229474	Fhdc1
3031	chr11	101163000	101163200	200	121.62	2.20758	0.000280578	0.526737	chip2_peak_4975	chr11_101163000_101163200	chr11	101163000	101163200	217198	Plekhh3
7035	chr17	84081900	84082100	200	121.628	2.20771	0.000767175	0.64339	chip2_peak_11630	chr17_84081900_84082100	chr17	84081900	84082100	74473	4933433H22Rik
7769	chr17	84235600	84235800	200	121.647	2.20806	0.000858956	0.651912	chip2_peak_12915	chr17_84235600_84235800	chr17	84235600	84235800	240174	Thada
8285	chr9	67845900	67846100	200	121.669	2.20846	0.0009232	0.65458	chip2_peak_13831	chr9_67845900_67846100	chr9	67845900	67846100	320528	Vps13c
6744	chr3	108781500	108781800	300	121.674	2.20855	0.000730397	0.638436	chip2_peak_11142	chr3_108781500_108781800	chr3	108781500	108781800	329738	Aknad1
105	chr7	49393000	49393600	600	121.71	2.20922	6.34e-07	0.0262972	chip2_peak_185	chr7_49393000_49393600	chr7	49393000	49393600	78286	Nav2
2050	chr2	69488000	69488200	200	121.716	2.20931	0.000163828	0.445635	chip2_peak_3366	chr2_69488000_69488200	chr2	69488000	69488200	14725	Lrp2
196	chr17	71244400	71245000	600	121.746	2.20986	2.94e-06	0.0660652	chip2_peak_354	chr17_71244400_71245000	chr17	71244400	71245000	64898	Lpin2
663	chr9	110315900	110316300	400	121.749	2.20991	2.99e-05	0.230501	chip2_peak_1116	chr9_110315900_110316300	chr9	110315900	110316300	72341	Elp6
793	chr16	35767600	35767900	300	121.76	2.21012	4.01e-05	0.264606	chip2_peak_1315	chr16_35767600_35767900	chr16	35767600	35767900	224132	Dirc2
1362	chr17	56101200	56101500	300	121.772	2.21034	8.91e-05	0.361087	chip2_peak_2216	chr17_56101200_56101500	chr17	56101200	56101500	57435	Plin4
4098	chr4	152184600	152184800	200	121.825	2.2113	0.000405089	0.573945	chip2_peak_6685	chr4_152184600_152184800	chr4	152184600	152184800	70025	Acot7
3812	chr4	116037500	116037700	200	121.835	2.21147	0.000372391	0.566295	chip2_peak_6222	chr4_116037500_116037700	chr4	116037500	116037700	72181	Nsun4
4303	chr16	11636400	11636600	200	121.849	2.21172	0.000432106	0.583311	chip2_peak_7032	chr16_11636400_11636600	chr16	11636400	11636600	74478	Snx29
2290	chr2	91320700	91320900	200	121.864	2.212	0.000191796	0.4718	chip2_peak_3750	chr2_91320700_91320900	chr2	91320700	91320900	228356	1110051M20Rik
2139	chr2	156250800	156251100	300	121.983	2.21416	0.000174406	0.456428	chip2_peak_3511	chr2_156250800_156251100	chr2	156250800	156251100	228829	Phf20
82	chr6	14999100	14999600	500	121.991	2.21432	3.48e-07	0.0180486	chip2_peak_147	chr6_14999100_14999600	chr6	14999100	14999600	114142	Foxp2
8758	chr1	194753200	194753400	200	121.994	2.21436	0.000986049	0.658559	chip2_peak_14720	chr1_194753200_194753400	chr1	194753200	194753400	18845	Plxna2
4854	chr4	35224100	35224300	200	121.994	2.21437	0.000497168	0.598657	chip2_peak_7941	chr4_35224100_35224300	chr4	35224100	35224300	73205	3110043O21Rik
224	chr10	75160700	75161200	500	122.008	2.21461	3.93e-06	0.0767729	chip2_peak_404	chr10_75160700_75161200	chr10	75160700	75161200	110279	Bcr
8818	chr4	149418700	149418900	200	122.013	2.21471	0.00099407	0.659266	chip2_peak_14835	chr4_149418700_149418900	chr4	149418700	149418900	63958	Ube4b
2204	chr10	31956900	31957100	200	122.023	2.2149	0.000182281	0.463378	chip2_peak_3623	chr10_31956900_31957100	chr10	31956900	31957100	432450	Nkain2
2967	chr2	105271900	105272200	300	122.025	2.21493	0.000272858	0.524046	chip2_peak_4864	chr2_105271900_105272200	chr2	105271900	105272200	74088	Them7
8435	chr11	48814400	48814600	200	122.042	2.21523	0.000943912	0.656297	chip2_peak_14123	chr11_48814400_48814600	chr11	48814400	48814600	211007	Trim41
6490	chr2	167113000	167113200	200	122.066	2.21566	0.000696093	0.632319	chip2_peak_10707	chr2_167113000_167113200	chr2	167113000	167113200	16500	Kcnb1
1457	chr7	125705300	125705600	300	122.072	2.21577	9.77e-05	0.374488	chip2_peak_2355	chr7_125705300_125705600	chr7	125705300	125705600	233863	Gtf3c1
8812	chr1	55054200	55054400	200	122.087	2.21606	0.000993239	0.659169	chip2_peak_14823	chr1_55054200_55054400	chr1	55054200	55054400	67876	Coq10b
5147	chr9	36795900	36796100	200	122.095	2.21619	0.000532755	0.605729	chip2_peak_8428	chr9_36795900_36796100	chr9	36795900	36796100	13663	Ei24
2429	chr15	4791100	4791400	300	122.099	2.21627	0.000209611	0.485665	chip2_peak_3994	chr15_4791100_4791400	chr15	4791100	4791400	12274	C6
3883	chr4	134508600	134508800	200	122.125	2.21673	0.000379954	0.567848	chip2_peak_6329	chr4_134508600_134508800	chr4	134508600	134508800	71904	Paqr7
2541	chr1	58187900	58188100	200	122.139	2.217	0.000220472	0.491396	chip2_peak_4157	chr1_58187900_58188100	chr1	58187900	58188100	71724	Aox3
5537	chr8	121647600	121647800	200	122.141	2.21702	0.000578569	0.614095	chip2_peak_9092	chr8_121647600_121647800	chr8	121647600	121647800	142682	Zcchc14
2122	chr12	17750800	17751000	200	122.141	2.21703	0.000171799	0.453125	chip2_peak_3483	chr12_17750800_17751000	chr12	17750800	17751000	53602	Hpcal1
7118	chr11	103246300	103246500	200	122.147	2.21714	0.000777515	0.643976	chip2_peak_11765	chr11_103246300_103246500	chr11	103246300	103246500	53859	Map3k14
3421	chr1	176998000	176998300	300	122.153	2.21726	0.000325974	0.549095	chip2_peak_5588	chr1_176998000_176998300	chr1	176998000	176998300	76816	Sdccag8
7762	chr15	79358500	79358700	200	122.204	2.21817	0.000857974	0.65169	chip2_peak_12905	chr15_79358500_79358700	chr15	79358500	79358700	17133	Maff
3852	chr3	52099400	52099600	200	122.225	2.21855	0.000375898	0.566666	chip2_peak_6282	chr3_52099400_52099600	chr3	52099400	52099600	433586	Maml3
1390	chr1	6382700	6383000	300	122.231	2.21867	9.18e-05	0.365957	chip2_peak_2257	chr1_6382700_6383000	chr1	6382700	6383000	620393	Fam150a
6758	chr14	70546700	70546900	200	122.235	2.21874	0.000731678	0.638436	chip2_peak_11164	chr14_70546700_70546900	chr14	70546700	70546900	72549	Reep4
3409	chr5	134542000	134542200	200	122.268	2.21933	0.000325209	0.549001	chip2_peak_5573	chr5_134542000_134542200	chr5	134542000	134542200	269713	Clip2
2774	chr12	111104900	111105100	200	122.278	2.21952	0.000247893	0.507604	chip2_peak_4532	chr12_111104900_111105100	chr12	111104900	111105100	217864	Rcor1
1672	chr5	103995300	103995500	200	122.279	2.21953	0.000120116	0.402872	chip2_peak_2710	chr5_103995300_103995500	chr5	103995300	103995500	114664	Hsd17b11
7457	chr10	17827400	17827600	200	122.312	2.22013	0.000817532	0.646951	chip2_peak_12361	chr10_17827400_17827600	chr10	17827400	17827600	378431	Txlnb
926	chr4	83794300	83794600	300	122.339	2.22062	5.06e-05	0.293373	chip2_peak_1517	chr4_83794300_83794600	chr4	83794300	83794600	320226	Ccdc171
2818	chr10	78458400	78458600	200	122.346	2.22074	0.000253882	0.511987	chip2_peak_4608	chr10_78458400_78458600	chr10	78458400	78458600	216134	Pdxk
2207	chr7	67704400	67704600	200	122.383	2.22143	0.00018279	0.464152	chip2_peak_3628	chr7_67704400_67704600	chr7	67704400	67704600	67009	Ttc23
2790	chr19	58975300	58975500	200	122.397	2.22167	0.000249022	0.507759	chip2_peak_4554	chr19_58975300_58975500	chr19	58975300	58975500	71653	4930506M07Rik
1021	chr7	114719800	114720100	300	122.412	2.22195	6.08e-05	0.317234	chip2_peak_1684	chr7_114719800_114720100	chr7	114719800	114720100	116903	Calcb
4634	chr5	144279200	144279400	200	122.416	2.22202	0.000471101	0.592894	chip2_peak_7581	chr5_144279200_144279400	chr5	144279200	144279400	100504231	Gm15708
4635	chr5	144279200	144279400	200	122.416	2.22202	0.000471101	0.592894	chip2_peak_7581	chr5_144279200_144279400	chr5	144279200	144279400	66898	Baiap2l1
1336	chr13	12231700	12232000	300	122.423	2.22215	8.62e-05	0.355563	chip2_peak_2167	chr13_12231700_12232000	chr13	12231700	12232000	238505	Mtr
6153	chr5	90283100	90283300	200	122.497	2.22349	0.000653775	0.627392	chip2_peak_10121	chr5_90283100_90283300	chr5	90283100	90283300	81702	Ankrd17
505	chr1	172132300	172132600	300	122.505	2.22364	1.96e-05	0.190738	chip2_peak_869	chr1_172132300_172132600	chr1	172132300	172132600	19298	Pex19
2698	chr18	70478000	70478200	200	122.518	2.22387	0.000239234	0.502223	chip2_peak_4415	chr18_70478000_70478200	chr18	70478000	70478200	170461	Stard6
8506	chr12	99330900	99331100	200	122.534	2.22417	0.000953688	0.657417	chip2_peak_14250	chr12_99330900_99331100	chr12	99330900	99331100	71375	Foxn3
5586	chr7	141329400	141329600	200	122.545	2.22437	0.0005863	0.616497	chip2_peak_9179	chr7_141329400_141329600	chr7	141329400	141329600	380959	Alg10b
5587	chr7	141329400	141329600	200	122.545	2.22437	0.0005863	0.616497	chip2_peak_9179	chr7_141329400_141329600	chr7	141329400	141329600	71448	Tmem80
6972	chr2	58775100	58775300	200	122.553	2.22452	0.000756592	0.641155	chip2_peak_11519	chr2_58775100_58775300	chr2	58775100	58775300	76654	Upp2
4987	chr9	55046900	55047100	200	122.555	2.22455	0.00051239	0.600571	chip2_peak_8162	chr9_55046900_55047100	chr9	55046900	55047100	108015	Chrnb4
3746	chr11	72065300	72065500	200	122.589	2.22517	0.000363939	0.562058	chip2_peak_6125	chr11_72065300_72065500	chr11	72065300	72065500	327958	Pitpnm3
8642	chr13	58760300	58760500	200	122.61	2.22554	0.000969464	0.657711	chip2_peak_14488	chr13_58760300_58760500	chr13	58760300	58760500	67585	4930455J16Rik
5985	chr11	23312500	23312700	200	122.611	2.22556	0.000636668	0.625463	chip2_peak_9867	chr11_23312500_23312700	chr11	23312500	23312700	17847	Usp34
875	chr7	107748100	107748300	200	122.62	2.22573	4.63e-05	0.280747	chip2_peak_1440	chr7_107748100_107748300	chr7	107748100	107748300	19024	Ppfibp2
7570	chr2	78888200	78888400	200	122.625	2.22581	0.000830415	0.648173	chip2_peak_12544	chr2_78888200_78888400	chr2	78888200	78888400	22193	Ube2e3
251	chr1	160979700	160980000	300	122.642	2.22613	4.7e-06	0.085606	chip2_peak_442	chr1_160979700_160980000	chr1	160979700	160980000	11905	Serpinc1
840	chr17	71062200	71062600	400	122.673	2.22669	4.39e-05	0.275457	chip2_peak_1389	chr17_71062200_71062600	chr17	71062200	71062600	17929	Myom1
4669	chr9	113681800	113682000	200	122.676	2.22674	0.000474501	0.592894	chip2_peak_7637	chr9_113681800_113682000	chr9	113681800	113682000	18571	Pdcd6ip
8722	chr5	32760800	32761000	200	122.682	2.22684	0.000979984	0.658047	chip2_peak_14641	chr5_32760800_32761000	chr5	32760800	32761000	320951	Pisd
4597	chr17	46995600	46995800	200	122.692	2.22702	0.000466236	0.591673	chip2_peak_7519	chr17_46995600_46995800	chr17	46995600	46995800	224826	Ubr2
6676	chr12	91806000	91806200	200	122.784	2.2287	0.000719823	0.636097	chip2_peak_11015	chr12_91806000_91806200	chr12	91806000	91806200	20338	Sel1l
3239	chr13	28688900	28689100	200	122.788	2.22877	0.000302554	0.535871	chip2_peak_5294	chr13_28688900_28689100	chr13	28688900	28689100	72518	2610307P16Rik
3587	chr3	105078200	105078500	300	122.802	2.22904	0.000345902	0.556491	chip2_peak_5869	chr3_105078200_105078500	chr3	105078200	105078500	75269	4930564D02Rik
188	chr2	28524900	28525600	700	122.846	2.22983	2.6e-06	0.0611906	chip2_peak_336	chr2_28524900_28525600	chr2	28524900	28525600	19730	Ralgds
3058	chr6	115897400	115897700	300	122.859	2.23006	0.000284438	0.529569	chip2_peak_5018	chr6_115897400_115897700	chr6	115897400	115897700	81896	Ift122
3460	chr1	151614700	151615000	300	122.865	2.23017	0.000330873	0.551856	chip2_peak_5648	chr1_151614700_151615000	chr1	151614700	151615000	63913	Fam129a
3045	chr13	95720200	95720400	200	122.893	2.23068	0.000282866	0.528827	chip2_peak_4997	chr13_95720200_95720400	chr13	95720200	95720400	544963	Iqgap2
788	chr4	155643600	155644100	500	122.951	2.23173	3.94e-05	0.262373	chip2_peak_1306	chr4_155643600_155644100	chr4	155643600	155644100	12537	Cdk11b
64	chr10	89720800	89721200	400	122.967	2.23202	1.75e-07	0.0113668	chip2_peak_114	chr10_89720800_89721200	chr10	89720800	89721200	67019	Actr6
254	chr2	122075000	122075500	500	122.994	2.23251	4.87e-06	0.0876786	chip2_peak_447	chr2_122075000_122075500	chr2	122075000	122075500	214585	Spg11
7164	chr6	54046800	54047000	200	123.006	2.23273	0.00078376	0.643976	chip2_peak_11854	chr6_54046800_54047000	chr6	54046800	54047000	69993	Chn2
3154	chr12	28801600	28801800	200	123.015	2.2329	0.000294249	0.532796	chip2_peak_5171	chr12_28801600_28801800	chr12	28801600	28801800	380752	Tssc1
6717	chr12	59158500	59158700	200	123.015	2.2329	0.000727273	0.63839	chip2_peak_11090	chr12_59158500_59158700	chr12	59158500	59158700	217615	Ctage5
997	chr18	65329100	65329600	500	123.023	2.23304	5.84e-05	0.311002	chip2_peak_1653	chr18_65329100_65329600	chr18	65329100	65329600	100526497	Mir466p
998	chr18	65329100	65329600	500	123.023	2.23304	5.84e-05	0.311002	chip2_peak_1653	chr18_65329100_65329600	chr18	65329100	65329600	225638	Alpk2
1684	chr14	74735800	74736000	200	123.041	2.23337	0.000121311	0.404134	chip2_peak_2728	chr14_74735800_74736000	chr14	74735800	74736000	13885	Esd
2098	chr3	54910600	54911100	500	123.045	2.23345	0.00016912	0.450803	chip2_peak_3445	chr3_54910600_54911100	chr3	54910600	54911100	329641	Sertm1
8644	chr3	95035000	95035200	200	123.049	2.23352	0.000970923	0.657711	chip2_peak_14498	chr3_95035000_95035200	chr3	95035000	95035200	19185	Psmd4
4478	chr18	5333700	5333900	200	123.075	2.23399	0.000451312	0.587882	chip2_peak_7312	chr18_5333700_5333900	chr18	5333700	5333900	240186	Zfp438
6447	chr10	127049600	127049800	200	123.079	2.23405	0.000691633	0.632282	chip2_peak_10633	chr10_127049600_127049800	chr10	127049600	127049800	13115	Cyp27b1
2882	chr8	61085500	61085700	200	123.105	2.23454	0.000261879	0.517109	chip2_peak_4719	chr8_61085500_61085700	chr8	61085500	61085700	18004	Nek1
4391	chr5	32802500	32802700	200	123.111	2.23465	0.000442254	0.586253	chip2_peak_7171	chr5_32802500_32802700	chr5	32802500	32802700	215476	Prr14l
6290	chr9	9160600	9160800	200	123.114	2.23469	0.000670055	0.628727	chip2_peak_10357	chr9_9160600_9160800	chr9	9160600	9160800	71544	Arhgap42
705	chr9	77945800	77946100	300	123.134	2.23506	3.27e-05	0.238878	chip2_peak_1182	chr9_77945800_77946100	chr9	77945800	77946100	68801	Elovl5
1316	chr7	112495600	112495900	300	123.149	2.23532	8.41e-05	0.352018	chip2_peak_2132	chr7_112495600_112495900	chr7	112495600	112495900	57342	Parva
4711	chr7	49533600	49533800	200	123.15	2.23535	0.000478608	0.593161	chip2_peak_7706	chr7_49533600_49533800	chr7	49533600	49533800	78286	Nav2
1915	chr7	84722800	84723000	200	123.171	2.23572	0.00014903	0.436341	chip2_peak_3115	chr7_84722800_84723000	chr7	84722800	84723000	72495	2610206C17Rik
4797	chr4	21728100	21728300	200	123.179	2.23588	0.0004898	0.597384	chip2_peak_7839	chr4_21728100_21728300	chr4	21728100	21728300	51813	Ccnc
8199	chr4	56902000	56902200	200	123.186	2.23599	0.000915333	0.65458	chip2_peak_13694	chr4_56902000_56902200	chr4	56902000	56902200	242474	Tmem245
1403	chr6	118990100	118990300	200	123.196	2.23617	9.24e-05	0.365957	chip2_peak_2272	chr6_118990100_118990300	chr6	118990100	118990300	12288	Cacna1c
1324	chr4	149150900	149151200	300	123.226	2.23672	8.51e-05	0.354491	chip2_peak_2145	chr4_149150900_149151200	chr4	149150900	149151200	110208	Pgd
2036	chr4	148609500	148609700	200	123.23	2.23679	0.000162024	0.443235	chip2_peak_3346	chr4_148609500_148609700	chr4	148609500	148609700	17175	Masp2
7379	chr10	69686500	69686700	200	123.272	2.23755	0.000808153	0.646243	chip2_peak_12214	chr10_69686500_69686700	chr10	69686500	69686700	11735	Ank3
2176	chr16	35739600	35739900	300	123.289	2.23786	0.000178483	0.45929	chip2_peak_3573	chr16_35739600_35739900	chr16	35739600	35739900	224132	Dirc2
[truncated: 6,086 more rows]
